# Supplementary material for: High frequencies of theropod bite marks provide evidence for feeding, scavenging, and possible cannibalism in a stressed Late Jurassic ecosystem
Source: PLoS One. 2020 May 27;15(5):e0233115. doi: 10.1371/journal.pone.0233115 (PMC7252595; doi:10.1371/journal.pone.0233115)
Supplement: S1 Table — (XLSX) [file pone.0233115.s001.xlsx]

## Sheet: theropod tooth data
Genus	ID#	Side	Location	Position	distal denticle width (mm)	mesial denticle width (mm)	Tooth crown basal length (mm)	Reference
Allosaurus	AMNH851	Right	Premaxilla	3	0.526316	0.5	17.95	Hendrickx et al., 2015
Allosaurus	AMNH851	Right	Maxilla	9	0.454545	0.5	22.2	Hendrickx et al., 2015
Allosaurus	CM 11844	Right	Premaxilla	-	0.416667	0.5	17.9	Hendrickx et al., 2015
Allosaurus	CM 11844	-	Isolated	-	-	-	18.2	Hendrickx et al., 2015
Allosaurus	CM 21703	Left	Premaxilla	2	0.5	0.5	12.6	Hendrickx et al., 2015
Allosaurus	CM 21703	Left	Premaxilla	3	-	-	15.6	Hendrickx et al., 2015
Allosaurus	CM 21703	Left	Premaxilla	4	0.454545	0.47619	15.5	Hendrickx et al., 2015
Allosaurus	CM 21703	Left	Premaxilla	2	0.5	0.47	14.05	Smith et al., 2005
Allosaurus	CM 21703	Left	Premaxilla	3	0.51	0.47	12.79	Smith et al., 2005
Allosaurus	CM 21703	Left	Premaxilla	4	0.48	0.43	13.73	Smith et al., 2005
Allosaurus	LACM 46030	Comp.	Premaxilla	1	0.51	0.49	16.1	Smith et al., 2005
Allosaurus	LACM 46030	Comp.	Premaxilla	2	0.46	0.51	16	Smith et al., 2005
Allosaurus	LACM 46030	Comp.	Premaxilla	3	0.44	0.48	15.5	Smith et al., 2005
Allosaurus	LACM 46030	Comp.	Premaxilla	4	0.45	0.48	16.3	Smith et al., 2005
Allosaurus	LACM 46030	Left	Premaxilla	5	0.42	0.44	17.5	Smith et al., 2005
Allosaurus	SDSM 25248	Left	Premaxilla	3	0.49	0.5	20.36	Smith et al., 2005
Allosaurus	SDSM 25248	Left	Premaxilla	5	0.36	0.28	16.01	Smith et al., 2005
Allosaurus	UMNH VP1251	Right	Premaxilla	5	0.37	0.43	16.1	Smith et al., 2005
Allosaurus	UMNH VP9211	Left	Maxilla	4	0.41	0.37	14.99	Smith et al., 2005
Allosaurus	UMNH VP9211	Left	Maxilla	6	0.33	0.36	15.22	Smith et al., 2005
Allosaurus	UMNH VP9218	Left	Maxilla	1	0.41	0.37	17.32	Smith et al., 2005
Allosaurus	UMNH VP9273	Right	Maxilla	6	0.29	0.3	14.78	Smith et al., 2005
Allosaurus	UMNH VP9273	Right	Maxilla	7	0.31	0.31	14.06	Smith et al., 2005
Allosaurus	UMNH VP9275	Right	Maxilla	7	0.29	0.28	12.08	Smith et al., 2005
Allosaurus	UMNH VP9365	Right	Dentary	2	0.41	0.41	10.63	Smith et al., 2005
Allosaurus	UMNH VP9369	Right	Dentary	6	0.32	0.28	11.77	Smith et al., 2005
Allosaurus	USNM 8335	Right	Maxilla	1	0.454545	0.416667	16.7	Hendrickx et al., 2015
Allosaurus	USNM 8335	Right	Maxilla	10	0.375094	0.384615	18.7	Hendrickx et al., 2015
Allosaurus	YPM 1333	Right	Premaxilla	2	0.45	0.48	12.46	Smith et al., 2005
Allosaurus	YPM 1333	Right	Premaxilla	3	0.44	0.42	12	Smith et al., 2005
Allosaurus	YPM 1333	Right	Premaxilla	5	0.37	0.39	13.04	Smith et al., 2005
Ceratosaurus	NMNH 4735	Left	Dentary	7	0.384615	0.4	19	Hendrickx et al., 2015
Ceratosaurus	NMNH 4735	Left	Dentary	9	0.375094	0.4	18.4	Hendrickx et al., 2015
Ceratosaurus	NMNH 4735	Right	Dentary	10	-	-	18.1	Hendrickx et al., 2015
Ceratosaurus	NMNH 4735	Right	Dentary	6	0.434783	0.5	17.4	Hendrickx et al., 2015
Ceratosaurus	NMNH 4735	Right	Dentary	12	0.4	0.444444	15	Hendrickx et al., 2015
Ceratosaurus	NMNH 4735	Right	Dentary	13	-	0.416667	14.9	Hendrickx et al., 2015
Ceratosaurus	NMNH 4735	Left	Maxilla	2	0.42	0.39	24.2
Ceratosaurus	NMNH 4735	Left	Maxilla	4	0.49	0.41	28.21
Ceratosaurus	UMNH VP5278	Left	Maxilla	1	0.53	0.45	25.47	Smith et al., 2005
Ceratosaurus	UMNH VP5278	Left	Maxilla	3	0.45	0.43	29.61	Smith et al., 2005
Ceratosaurus	UMNH VP5278	Left	Maxilla	5	0.37	0.39	32.95	Smith et al., 2005
Ceratosaurus	UMNH VP5278	Left	Maxilla	8	0.38	0.33	27.52	Smith et al., 2005
Ceratosaurus	UMNH VP5278	Left	Maxilla	10	0.42	-	20.79	Smith et al., 2005
Ceratosaurus	UMNH VP7819	Left	Premaxilla	1	0.59	-	25.86	Smith et al., 2005
Ceratosaurus	UMNH VP7819	Left	Premaxilla	2	0.56	-	23	Smith et al., 2005
Ceratosaurus	UMNH VP7819	Left	Premaxilla	3	0.44	0.47	24.04	Smith et al., 2005
Ceratosaurus	UMNH VP7819	Right	Premaxilla	1	0.5	-	20.26	Smith et al., 2005
Ceratosaurus	UMNH VP7819	Right	Premaxilla	3	0.53	0.44	22.64	Smith et al., 2005
