# Supplementary material for: High frequencies of theropod bite marks provide evidence for feeding, scavenging, and possible cannibalism in a stressed Late Jurassic ecosystem
Source: PLoS One. 2020 May 27;15(5):e0233115. doi: 10.1371/journal.pone.0233115 (PMC7252595; doi:10.1371/journal.pone.0233115)
Supplement: S2 Table — (XLSX) [file pone.0233115.s002.xlsx]

## Sheet: Specimen List
MWC Specimen #	Taxon	Skeletal Element	Bone Surface Modification	Description
9413	Allosaurus	Tibia	depressed fracture	evidence of crushing 4.0923mm deep
			scores	5 overlapping crisscross scores
			scores
			scores
			scores
			scores
			prep damage	3 or 4 lines extremely thin lines
949	Allosaurus	Metatarsal	score	relatively deep long and wide score 1.3999 mm deep
			score	two parallel, narrow scores relatively long, proximal score is .5696 mm deep, distal score is .1985 mm deep, one at an angle to proximal horizontal score .3122 mm deep
			score
			score
			score	relatively wide curved short score 1.3629 mm deep
			score	score starts straight and turns into an upside down parabola, relatively wide .583 mm deep
			serial scores	about 25 overlaping scores all relatively short and shallow, and relatively parraallel
			score	relatively short narrow deep score .6987mm deep
			score	relatively small short score .6405mm deep
1934	Allosaurus	Phalanx	serial scores	3, maybe 4 scores. Somewhat parallel
			score	2 scores, both very short, relatively shallow. One score has a sharp angle in the middle
			score
2743	Allosaurus	Haemal Arch	score	2 scores, one very curved score 1.002 mm deep, and one straight .1.1002mm deep
			score
			score	Straight deep score 1.0585 mm deep
			score	long deep score
			score	curved score
2763	Allosaurus	Rib Fragment	score	extremely shallow score .0112 mm deep
			score	shallow score
			striated score	very shallow, long score with striations
			score	very, very shallow, short score
			score	somewhat deeper, short score
			score	very shallow, somewhat short score .0246mm
2764	Allosaurus	Rib Fragment	pits	a set of 3 parallel pits .15cm deep
			score	single linear sore directly beneath pits >.1cm deep
			score	5 parallel scores >.1cm deep
			score	a single score perpendicular to th e5 parallel scores >.1 cm deep
			score	single linear score >.1cm deep
			score	single score >.1 cm deep
3641	Allosaurus	Vertebral Fragment	punctures	realatively shallow
			score	very deep score with obvious impact/crush damage
			punctures	puncture about .2 cm deep
3748	Allosaurus	Rib Fragment	score	single somewhat curved score .0284 mm deep
			score	single linear score with possible claw puncture at proximal end of score .2875mm deep
			score	single linear score intersected with crack .085mm deep gets deeper on distal end of score
			score	single linear score with flaking at the distal end of the score .5733 deep (More proximal than next score)
			score	single linear score with flaking on the distal end of score >.1cm deep(under ID tag)
			pit	>.1cm deep pit
			striations	3 parallel furrows clustered together >.1 cm deep
			serial scores	2 Parallel scores that converge towards medial end .2488 mm .wide
			pit	small slightly discolored pit .0125cm deep
3759	Allosaurus	Metatarsal	scores	One long, shallow score directly below two short, shallow scores. Not parallel.
			score	short, shallow score. Fairly heavy Bone flaking closer to proximal end.
3809	Allosaurus	Metatarsal	serial pits	5 parallel pits of simiar lengths and widths >.1cm deep[
			scores	2 crossing scores with similar widths and lengths
			score	single linear score >.1cm deep
			score	single linear score with heavy flaking at proximal end of score .1cm deep
			score	single somewhat curved score with Bone flaking on proximal edge of score >.1 cm deep
			score	2 linear parallel scores >.1 cm deep possible slight curve at proximal end of scores
3814	Allosaurus	Metatarsal	score	Somewhat wide, deep score but relatively short lengthed
			score	2 coverging relative shallow wide scores
			score	very shallow and narrow, somewhat long with flaking at proximal end of score
3833	Allosaurus	Rib Fragment	serial scores	three parrallel score
			depressions	set of three parallelish depressions
			serial pits	in an arc shallow
			score	Straight deep score
3857	Allosaurus	Metatarsal	score	1 score ~3 cm below red numbers
			score	score roughly 3 cm below and to the right of ID tag
3864	Allosaurus	Distal Caudal Centrum	puncture	puncture about .2 cm deep
			pit	small pit near puncture
			striations	3 clustered parallel groves
3865	Allosaurus	Vertebral Fragment	score	Single linear score >.1cm deep
			score	single score >.1 cm deep
			score	relatively short narrow score
			score	Single linear score >.1cm deep
4225	Allosaurus	Humerus	score	linear deep score
			score	linear shallow score
			score	deep score with slight curve
			score	shallow linear score
			score	curved score
5311	Allosaurus	Metatarsal	striations	Numerous parallel furrows clustered together.
			furrows	5 parallel furrows ranging from ..779mm - 1.0145mm deep
			furrows	2 parallel groves ranging from .4272mm - .8208 deep
5324	Allosaurus	Phalanx	scores	Multiple fairly parallel scores caused by airscRibe
			scores	Several shallow, short scores
			score	Shallow, curved score
			score	shallow score with ~120° angle in middle
5329	Allosaurus	Metatarsal	furrows	Multiple very deep, very smooth furrows
5703	Allosaurus	Rib Fragment	scores	5 scores relatively narrow, somewhat deep pretty short
			root marks	extensive root mark patch
			scores	3 somewhat parallel scores one being realatively very deep and the others being relatively shallower
			scores	4 scores all relatively shallow and short, one extrememly curved other three relatively straight
			furrows	3 shallow parallel groves
			score	series of parallel scores deeper going from lateral to medial
			serial scores	series of very short, somewhat deep parallel scores. Appears right at break between Bone Fragments
			serial scores	A series of very short, somewhat deep parallel scores. Appears right at break between Bone Fragments
			scores	Two parrallel scores. Relatively long and deep. Not quite parallel
			score	one score with slight bend in middle
			scores	3 parralele scores ranging from relatively long to relatively small
6634	Allosaurus	Rib Fragment	root marks	4 patches of root marks around specimen
6711	Allosaurus	Distal Caudal Centrum	score	two deep crosing scores
			serial scores	3 parallel scores acompanied with heavy Bone flaking 2 scores longer than the 3rd
6731	Allosaurus	Gastralia	score	single linear score that widens at medial end >.1cm
			score	single linear score >.1cm deep
8675	Allosaurus	Dorsal Vertebral Centrum	striations
			score	Large striated score
			root marks	Possible root activity in the form of large filligree like trace, raised
5055	Allosaurus	Dorsal Vertebral Centrum	score	substantial scoring
			serial pits
			root marks	odd etched branching structure
5054	Allosaurus	Caudal Centrum	insect pits / furrows	smooth sidded pitting
			scores	somewhat deep, verry short score
			punctures	possible punctures but surface is very weathered
			scores	2 parallel scores
5034	Allosaurus	Dorsal Centrum	pits	whitish staining with small pits
5817	Allosaurus	Proximal Caudal Centrum	score	linear structure might be a score but surrounding Bone has exfoliated
			score	straight score extremely exfoliated
			score	long deep meandering score
			serial pits	about 10-12 serial pits in arc
			depression	2 linear depressiond not quite intersectiong one long and one short
			score	very narrow, fairly straight
			pits	4 pits scatered
			serial scores	about 4-5 parallel serial scores with 3 very close together and 2 slightly more apart
			insect pits / furrows	insectptting with possible burrows
			insect pits / furrows	insect pitting surrounded by exfoliation
			pits	irregulare interconnected pits/etching
5821	Allosaurus	Caudal Centrum	prep damage	edges scratched in thing circular patterns
3743	Allosaurus	Dorsal Centrum	cracking / fracture	compression related cracking/deformation around Centrum minimal staining
5031	Allosaurus	Caudal Centrum	fracture	linear fracture looks like exfolliation follows compressin fracture
3746	Allosaurus	Dorsal Centrum	abrasion	interesting abrasion
5039	Allosaurus	Dorsal Centrum	scores	2 short relatively shallow scores on clost to ventral one close to Dorsal
			score	a few potential scores with smoth sides and exfoliated through about 4 scores
5646	Allosaurus	Dorsal Neural Arch	scores	6 small scores relatively shallow
			root marks	Bone surfaces in rough condition modern roots growing over Bone surface
5191	Allosaurus	Dorsal Vertebra	root marks	potential for modern root marks
5018	Allosaurus	Tibia	score	4 scores all straight and parallel
			insect pits / furrows	patch of pitting
			insect pits / furrows	10 pits in a cluster
			score	2 dense patches of scores
			score	patch 1: distal end, many branching/crisscrossing scores
			score	patch 2: proximal end, many scores in various sizes most overlapping
3819	Allosaurus	Ilium	root marks	Modern root marks
7257	Allosaurus	Caudal Centrum	pits	few pits and scores have very pale color relative to surrounding surface
			scores
3727	Allosaurus	Limb Fragment	insect pits / furrows	found in a few of the remaining patches of surface Bone
7268	Allosaurus	Caudal Vertebrae	root marks	modern root activity
9408	Allosaurus	Pubic Boot	insect pits / furrows	surficial mining
5037	Allosaurus	Tibia	insect pits / furrows
2880	Allosaurus	Tibia	score	3 scores with v-shaped cross section
			striations	small area of striations with 5 lines
			scores	7 sets of scores all with at least 2 scores covering entire anterior distal 1/2, in all shapes, directions, and sizes
			insect pits / furrows	patch of insect pits / furrows
5483	Allosaurus	Fused Sacral Arches	insect pits / furrows	extensive Possible insect pits / furrows across entire Bone, on all Bone surfaces
			score	straight score that intersects a crack somewhat shallow
			score	deep slightly flaky curved score
			score	short shallow curved score
			score	long bent score
			score	curved score
			scores	2 overlapping scores
			scores	short relatively shallow
			scores	cluster of branching scores possibly prehistoric root marks
			score	flaking score
			score	backwards s-shaped score relatively more shallow
			score	straight deep score
			score	a curved score that turns into pitting
			score	one curved score above linear sscore
			scores	one linear straight deep score
			scores	score in oval shape
6604	Allosaurus	Tibia	insect pits / furrows	extensive insect pits / furrows
			root marks	modern root cover
5700	Allosaurus	Tibia	puncture	deep punture
			score	extremely long deep straight deep score
			insect pits / furrows	extensive pitting and mines coveriing entire Bone surface of anterior side
			striations	extremly long striations
			scores	two very shallow crossing scores
			score	slightly exfoliated fairly straight score
			score	slightly curved smooth sedged score
			puncture	deep punture obscured by fracture
			insect pits / furrows	Patchy surface might be extensive insect pits / furrows
5644	Allosaurus	Fibula	score	small scores on midshaft obsured by modern root damage
			scores	small scores clustered together in a patch
			score	slightly curved, shallow and narrow
			insect pits / furrows	insect pits / furrows
5027	Allosaurus	Fibula	punctures	2 punctures
			pits
			insect pits / furrows	several irregular pits/ extensive insect pits / furrows covering distal end of Bone
2848	Allosaurus	Fibula	insect pits / furrows	insect pits / furrows/boring
			scores	veery short, narrow, shallow, straight score
			scores	2 very short parallel scores
			scores	slightly deeper and straight
			scores	scores including possible striations
			scores	very short slightly above midshaft, straight
			depressions	3 depressions
			insect pits / furrows	insect pits / furrows
			insect pits / furrows	insect pits / furrows
2872	Allosaurus	Fibula	score	directly above s small scres. Straight relatively shallo score
			scores	2 small scores
5652	Allosaurus	Tibia	scores	2 parallel scores crossed by 3rd short score
			insect pits / furrows	extensive insect pits / furrows
			punctures	2 possible punctures
8708	Allosaurus	Metatarsal	score	straight shallow slightly exgfollitaed score
			serial scores	multiple sets of serial scores with at least 3 in each set
			insect pits / furrows	patchy irregular insect pits / furrows
6721	Allosaurus	Rib	scores	possible cluster of parallel scores
9412	Allosaurus	Scapula	insect pits / furrows	2 patches of insect pits / furrows
8709	Theropoda	Rib Fragment	insect pits / furrows	insect surface mining wraping around the first 60mm of Bone
5460	Allosaurus	Tibia	punctures	2 punctures
			scores	cluster of small scores
			pits	pits
			insect pits / furrows	intensive insect mining
9411	Allosaurus	Rib	abrasion	several very fine nearly parallel scratches transverse to length of Rib
			serial scores	3 paralllel scores and 1 crosing score
			serial scores	possible part of interior surface
5658	Allosaurus	Rib	scores	2 parallel short scores
			scores	6 small scores surrouning specimen id
			scores	curved score
			insect pits / furrows	isolated pits and patches where they run together
9409	Allosaurus	Fibula	score	several small scores
			score	score with possible striations
7261	Allosaurus	Rib	scores	extremely shallow slightly exfoliated serial scores
			insect pits / furrows	small area of insect pitting
			prep damage	fine linear abrasion on Bone is also visible on plaster particles
7258	Allosaurus	Tibia	score	several small scores
			score	several small scores
7259	Allosaurus	Ischium	score	mostly straight score
			insect pits / furrows	possible insect pits / furrowsmostly pitting
3794	Allosaurus	Cervical Vertebra	striation
			score	narrow straight score
			serial scores
			scores	2 parallel scores with 1 branching into 3rd
			serial score
			insect pits / furrows	insect pitting
4010	Allosaurus	Cervical Vertebra	insect pits / furrows
			insect pits / furrows	Areas with pits, repeated small furrows, general insect pits / furrows
5492	Allosaurus	Proximal Caudal Centrum	scores	shallow scores
			insect pits / furrows
2217	Allosaurus	Dorsal Vertebra	root marks	one small patch at surface Bone might show root marks
5033	Allosaurus	Centrum	insect pits / furrows	BSM aaociated with exfoliation
5036	Allosaurus	Partial Vertebral Centrum	insect pits / furrows	clusters of irregularly space pitting
			insect pits / furrows	4 very shallow, small pits
			scores	3 very shallow scores in various directions
9414	Theropoda	Partial Vertebral Centrum	furrows	3 deep furrows but surrounding Bone exfoliated
			prep damage	definite light color marks
			serial scores	3-4 extrememly narrow, somewhat linear, parallel scores
3637	Allosaurus	Dorsal Centrum	insect pits / furrows	very faint potential insect traces
			pits	few pits potentially bite marks
			score	score
			score	Deeper, straight score
			striation	striation below score above ^
			score	on same plane as above ^
			score	Deeper, shorter, curved score
9407	Allosaurus	Caudal Centrum	striations	odd bite marks one on each side
			prep damage	tool mark shattering
3750	Allosaurus	Dorsal Centrum	insect pits / furrows	area with pits and irregular bumps from insect pits / furrows
			pits	3 pits
			scores	Multiple very small, shallow scores on ventral surface under dashed red line
			score	A (relatively) long shallow score
2726	Allosaurus	Dorsal Neural Arch	insect pits / furrows	possible insect pits / furrows
			insect pits / furrows	pitting and small furrows
			scores	2 small scores
			serial scores	2 parallel scores
			score	shallow score with pit in middle. Many small/shallow scores on pedicle area as well.
			pit
			insect pits / furrows	area with Bone flaking and pitting from insects
3632	Allosaurus	Dorsal Centrum	scores	Many overlapping scores varying in width, length & depth. Possible prep damage included in area.
			serial scores	One wider linear score on middle of concave surface opposite from the ID tag
			pits	3 pits of varying sizes, one may be nutrient hole. Ask Julia/Stephanie
			pits	Set of 3 pits(?) large but with tails that stretch out and grow more shallow than the pit
3631	Allosaurus	Dorsal Centrum	pits	Area w/ 5-6 small pits
			score	Wide, very short & shallow score
2534	Allosaurus	Caudal Neural Arch	insect pits / furrows	insect pits / furrows overlain with prep damage
2728	Allosaurus	Dorsal Vertebra	insect pits / furrows	posible minor insect pits / furrows
3635	Allosaurus	Fused Caudal Centra	depressed puncture
			pits	5 pits
			scores	2 curved short scores
			scores	2 short shallow scores with one curved
			serial scores	3 serial scores
			scores	area covered in scores ranging in size depth and width
			score	short straight score
5177	Allosaurus	Sacral Vertebra	insect pits / furrows
			insect pits / furrows	cluster of insect pits / furrows
			striation	extremely shallow striation
			insect pits / furrows	insect pits / furrows in exfoliated area
			score	mostly straight score
8698	Allosaurus	Carpal	scores	2 possible scores associated with exfoliation
			pit	pit
5025	Allosaurus	Quadrate	insect pits / furrows	several patches
6629	Allosaurus	Bone Fragment	insect pits / furrows	several large oval traces
5193	Allosaurus	Squamosal	score	1 short and straight score
			scores	3 parallel short scores (could be flakes)
			insect pits / furrows	possible insect traces
5309	Allosaurus	Lachrymal	insect pits / furrows	at least two patches of insect traces
			scores	a collection of several smooth sided scores with no crush damage
			insect pits / furrows	Small area with insect pitting and burrows
			insect pits / furrows	Small cluster of insect pits
			insect pits / furrows	Small cluster of insect pits
			scores	Multiple smooth sided pits and small scores
			pits	Large pits w/ Bone flaking
			score	Small, linear score. NOT continuous! Looks like whatever made it skipped like a rock after initial score.
3845	Allosaurus	Quadrate	insect pits / furrows	patchy insect traces
			insect pits / furrows	lots of tiny pits and burrow traces
			insect pits / furrows	Extensive insect pits / furrows & pitting
			insect pits / furrows	minor pitting
			scores	2 very short, somewhat curvy scores
8717	Allosaurus	Haemal Arch	striated score	running lengthwise
			serial scores	extremly narrow serial scores
			root marks
			insect pits / furrows	small bits of insect pits / furrows under id tag
8722	Allosaurus	Haemal Arch	striations	area with striations
			insect pits / furrows	small patch of insect pits / furrows
			scores	3 very small deep curved scores
6639	Allosaurus	Vertebra	insect pits / furrows	patches of insect pits / furrows all over
7263	Allosaurus	Pedal Claw	striations	2-3 scores on each side. Straight, short and relatively not too deep
			pits	2 small pits. Bone flaking also present around area
			pits	3-4 very small pits
			insect pits / furrows	Very well defined insect pits / furrows
8543	Allosaurus	Metacarpal	scores	~4 short, deep scores
			pits	3-4 small pits. Possible insect pits / furrows?
			score	Long shallow score diagonal over ID tag
8714	Theropoda	Phalanx	puncture	deep puncture with possible score
			score	score inside punture
7294	Theropoda	Distal Caudal Centrum	score	Narrow, curved score
7396	Allosaurus	Metacarpal	score	relatively deep and long score
			scores	parralel relatively deep scores
6931	Allosaurus	Caudal Centrum	serial pits	7+ serial pits
			score
			pits	2 pits on exfolited side too exfoliated to measure
2730	Allosaurus	Caudal Centrum	insect pits / furrows	HEAVY insect pits / furrows (mines & pits)
			scores	2 linear and relatively deep scores
			pits	2 large pits
			scores	many very small randomly spaced scores
			score	1 smallish score
			score	short score with flaking
3852	Theropoda	Vertebral Centrum	pits	covered in small pits
			striations	3 sets of striations
3849	Allosaurus	Metacarpal	edge mark	One possible edge mark - hard to see under mag.
5572	Allosaurus	Cervical Arch Fragments	serial scores	possible serial scores with flaking
			insect pits / furrows	a lot of insect pits / furrows
4252	Allosaurus	Gastralia	pits
			scores	many small scores and pits
			scores	2 scores going different directions
			scores	striated scores/serial scores
8707	Theropoda	Rib Fragment	pits	small number of possible pits and scores but surface quality is poor
			scores
5554	Allosaurus	Caudal Vertebra	punctures	punctures
9002	Theropoda	Gastralia	striated score	one striated score on shaft
9096	Theropoda	Rib	insect pits / furrows	pitted insect pits / furrows in small patches near the proximal end
2936	Theropoda	Sacral Rib	furrows	3 deep furrows , one is v-shaped in cross section
9354	Theropoda	Limb Fragment	scores	Limb Fragment - shaft only, no epiphyses, several scores present on shaft
5918	Sauropoda	Distal Caudal Vertebra	score	extremely exfolited score
			scores	two converging scores
5917	Sauropoda	Mid. Caudal Vertebra	score	slightly curved score
			insect pits / furrows	extensive insect pits / furrows all around Bone
			scores	2 parallel scores
9699	Sauropoda	Vertebra	serial scores	8-9 overlaping scores
7273	Apatosaurus	Vertebra	score	Short Narrow Straight score with curve in the middle
5912	Apatosaurus excelsus	Mid. Caudal Vertebra	furrows	4 short deep relatively parallel furrows
			scores	7 scores roghly parallel
			score	long straight slightly exfoliated score
			score	short straight slighty exfolated at one end
5916	Sauropoda	Mid Caudal Vertebra	puncture	possible puncture with flaking
			insect pits / furrows	pit surrounded by flaking
			scores	many extremely shallow overlapping scores
5911	Sauropoda	Distal Caudal Vertebra	serial scores	overlapping scoreas in many directions
			score	single straight short narrow score
5914	Sauropoda	Proximal Caudal Vertebra	furrows	4 unidetified furrows surrounded byexfoliation with no particular pattern
			scores	many scores in all directions overlaping each other
			scores	multiple straight long narrow scores
			score	deep diagnal branching score
7399	Sauropoda	Proximal Caudal Vertebra	scores	One long and one short score
			score	One short, narrow, relatively deep score.
			score	One short, narrow score
			depression	Curved depression
			serial scores	3 Parallel scores
			score	Curved score
			score	Short score
			scores	2 short parallel scores
			prep damage
			scores	MANY overlapping, long scores going in all directions and with differing thicknesses
			depression	long, linear depression
			scores	2 scores in the shape of a T
1427	Sauropoda	Cervical Vertebra	score	Long, curved score
			score	Exremely long, curved score w/ flaking
			score	Smaller, shallow, straight score
			insect pits / furrows	Extreme insect pits / furrows (both pitting and burrowing on all surfaces
			depression	One depression that has two-three parts separated by very spaces
			score	Long score
			score	Very shallow score
			serial scores	10 branching serial scores
5909	Apatosaurus excelsus	Cervical Vertebra	insect pits / furrows	insect pits / furrows
			insect pits / furrows	entire surface covered in insect pits / furrows
			serial scores	4-5 scores
			score	long thin shallow score
			scores	2 small short scores
			score	small short score
			score	starts of score but turns into flaking so could possibly be longer
			insect pits / furrows	extensive insect pits / furrows with burrows and pitting
			serial scores	4 scores rainbow pattern exfoliated
			serial scores	branching serial scores
			serial scores	8 scores
			scores	4 parallel scores with exfoliation
			serial scores	5 serial scores
7282	Sauropoda	Vertebra	serial scores	2 of scores broken off out of the 7-8 small scores
			furrows	unidentified furrows with discoloration
1049	Sauropoda	Cervical Vertebra	score	2 scores
			score	2 parallel scores
			score	curved score
			score	crosses a crack, curved
8705	Sauropoda	Distal Caudal Vertebra	insect pits / furrows	insect pitting
			scores	3 scores
5089	Apatosaurus	Pubis Fragment	score	1 long score with extreme exfoliationat end
			depressions	loong thick depression
			depressions	pair of depressions in an acute angle
863	Sauropoda	Dorsal Vertebra	insect pits / furrows	extreme insect pits / furrows
			striations	branching striations
			scores	3 short scores in a cluster
			scores	2 thin medium lengthed parallel scores 11.72 mm apart
			score	small short score
			score	thin slightly wavy medium sized score
			abrasion	possible abrasion marks
			scores	short shallow narrow scores
			scores	4 short scores
8046	Apatosaurus	Proximal Caudal Vertebra	insect pits / furrows	lots of insect pits / furrows
			score	medium sized lightly curved score
			score	straight medium sized score
			score	staight medium sized score
			score	long Y shaped score
			score	medium sized upside down parabola shaped score
			scores	2 medium sized upside down parabola shaped scres
			scores	18 thin shallow scores in parabola shape
5167	Apatosaurus	Cervical Vertebra	insect pits / furrows	insect pits
			score	slight wave
			score	linear medium sized score
			score	medium sized wide score with slight curve
			score	wide medium sized straight score
			score	curved score flaking at end
9526	Sauropoda	Cervical Vertebra	score	very deep score with abarsions inside
			score	long narrow shallow score
			depression	deep depression with flaking
			insect pits / furrows
			score	y shaped score
			score	shot thin score
			score	thin long extremely shallow
			score	V shaped score
			scores	two fairly parallel scores one long and deep and one in a V shape
			striations	short striations
3779	Sauropoda	Dorsal Vertebra	insect pits / furrows
			score	slightly curved score
			score	longdeep score
			score	straight score with slight bend
			score	slight wave
			score	gently curved
			score	long somewhat curvy score
3778	Sauropoda	Cervical Vertebra	insect pits / furrows	lots of insect pitting
			serial scores	3 exactly parallel serial scores smallest has flaking at one end
			score	long score
			score	straight score could be longer but oes to broken edge
			score	long deeper score with flake at end
			score	straight long shallow score
			score	thick shallow score with flaking that is curved with a peak
			score	slightly curved very deep score with flaking
			score	long flaked score intersecting previous entry at one end
			scores	2 shallow parallel scores
			pits	8 pits in two rows
			insect pits / furrows	lots of pitting and burrows
2869	Sauropoda	Dorsal Vertebra	score
			serial scores	5 serial scores with 1 crack crossing all 5
			score	V-shaped score
			insect pits / furrows	heavy insect pitting
			pits	12 pits in 4 fairly parallel rows
			scores	2 parallel scores
			scores	2 short deep scores
822	Apatosaurus	Dorsal Vertebra Fragment	score	thin shallow score
			serial scores	8 small short serial scores
2209	Sauropoda	Caudal Vertebra	insect pits / furrows	extreme insect pitting
			scores	3 curved longer scores
			scores	2 almost parallel slightly converging scores
			scores	12 scores in varying depth width and shape
			score	short thick deep score
			score	possible extremely flaked score
			scores	14-15 scores varying in length width and depth
			score	1 Y shaped score
			score	one long straight score, exfoliated
2551	Sauropoda	Proximal Caudal Vertebra	scores	8 possible scoresin extremly exfoliated
			insect pits / furrows
			scores	2 thick parallel scores with flaking
			score	deep upside down parabola shaped curve connected to parabola shaped curve
			score	deep wide gentle v shaped score
			score	long score with extreme flaking in gentle W shape
			score	short shallow score
			score	shallow short score interrupted by flaking
4333	Sauropoda	Mid. Caudal Vertebra	insect pits / furrows	insect pitting and burrowing
			score	wide medium sized score
			score	shallow score with flaking
			score	deep medium sized score
4016	Sauropoda	Proximal Caudal Vertebra	score	medium shallow score
			score	medium sized score with bend and flaking could be longer
			root marks	modern root marks
			score	medium sized score with flaking
			serial scores	4 serial scores
			insect pits / furrows
			score	short shallow score
2562	Sauropoda	Distal Caudal Vertebra	score	deep narrow medium sized score
			insect pits / furrows	extreme insct damage with burrows
			score	long score with flaking
			root marks
			score	long wavy score with flaking and slightly obstructed by exfoliation
			score	flaking long score
			score	long flaking score
			score	long score with root traces
			score	long thick score with evidence of exfoliation
9698	Apatosaurus	Proximal Caudal Vertebra	score	small straight deep score
			score	medium sized wave shaped score extremely shallow
			striations	short small striations
			score	medium sized thick score
			score	medium sized score
3835	Apatosaurus	Mid Caudal Vertebra	root marks
			insect pits / furrows	lots of insect pits / furrows including burrowing
			score	medium sized score with bend in it
			score	thick medium sized score
			score	deep flaked straight score
3838	Apatosaurus	Mid Caudal Vertebra	score	thin score with flaking in gentle v shaped
			insect pits / furrows	lots of insect pitting and burrows
			score	thin short score with bend in it
			score	branching score
			serial scores	5 thick medium sized
4334	Apatosaurus	Vertebra	insect pits / furrows	extreme insect pits / furrows
2927	Apatosaurus	Proximal Caudal Vertebra	root marks	modern root marks
			serial scores	4 possible serial scores in exfoliated area
			score	long thin score with flaking
			score	wide long score
			score	extremely weird saped score possibly several connected unclear due to exfoliation and flaking
2870	Apatosaurus	Dorsal Vertebra	score	curved score
			score	1 curved score
			root marks	modern root marks
			insect pits / furrows	lots of insect pits / furrows
			score	wave like score
			scores	2 scores one straight and one curved
5041	Apatosaurus	Mid Caudal Vertebra	score	long score really flaked and kinda wavy
2888	Apatosaurus	Proximal Caudal Vertebra	insect pits / furrows	lots of insect pits / furrows including burrowing
			score	straight narrow score
			root marks	root damage
			score	score with slight curve like a cosign graph
			score	wide score with slight bend and flaked
			score	long wide straight slight curve score
5042	Apatosaurus	Proximal Caudal Vertebra	insect pits / furrows	insect pits / furrows including burrows
			score	branching score
			score	medium sized thick score
			score	short score with flaking
9525	Apatosaurus	Distal Caudal Vertebra	insect pits / furrows
			score	slightly curved wide score with lots of exfoliation
5004	Apatosaurus	Distal Caudal Vertebra	score	extremely flaked medium straight wide score
			root marks	modern root marks
5047	Sauropoda	Vertebra	root marks	modern root marks
			insect pits / furrows
4181	Sauropoda	Caudal Vertebra	insect pits / furrows	extreme insect pits / furrows
2723	Sauropoda	Distal Caudal Vertebra	scores	5 long scores with flaking
			insect pits / furrows
			score	thin small curved score with flaking
			score	long wide score with flaking
5175	Apatosaurus	Distal Caudal Vertebra	insect pits / furrows	extreme insect pits / furrows
			score	upside down parabola shapped score with flaking
9697	Sauropoda	Distal Caudal Vertebra	insect pits / furrows	insect pits / furrows
			root marks
			scores	two parallel scores
			score	curvedish score
5003	Sauropoda	Distal Caudal Vertebra	serial scores	4 long slightly parallel wide serial scores
			scores	4 long converging scores
			score	curved score
5001	Sauropoda	Distal Caudal Vertebra	insect pits / furrows
			root marks
			scores	2 scores one medium sized with a slight curve and the other long and wavy both with flaking
			striations	short striations
			score	long score
5540	Apatosaurus	Mid. Caudal Vertebra	scores	2 parallel scores one longer than the other both slightly obscured by exfoliation
			scores	5 serial scoresextremely thin and medium sized with flaking (possibly longer)
			scores	11 serial scores in a row, small short and thin
			insect pits / furrows
			root marks
3633	Apatosaurus	Dorsal Vertebra	score	slightly curved long score obsucred by insect pits / furrows and intersected by crack
			insect pits / furrows
2984	Sauropoda	Proximal Caudal Vertebra	insect pits / furrows
			score	long thin score
			score	mediumish wide score wit flaking
			scores	8 crisscrossing scores
			score	long straight score with slight flaking
			root marks	extensive root marks
2554	Apatosaurus	Dorsal Vertebra	serial scores	8 serial scores in exfoliated area
			insect pits / furrows
			serial scores	7 thin small serial scores all mostly parallel
			score	long slightly wavy score
			score	gently wavy score
			scores	2 intersecting scores long and wide and slightly flaked
			score	small score with flaking
			scores	2 long parallel scores
9696	Sauropoda	Cervical Vertebra	insect pits / furrows
			serial scores	4 serial scores
1928	Apatosaurus	Cervical Vertebra	scores	2 crossing scores in an X shape
			insect pits / furrows
			root marks
2252	Sauropoda	Vertebra	insect pits / furrows
9530	Apatosaurus	Cervical Vertebra	insect pits / furrows
			score	curved score
			root marks
2557	Apatosaurus	Cervical Vertebra	score	thick odd shaped score
			root marks
			score	long straight wide score with flaking
			score	long straight score
			score	slightly wavy wide score
2552	Apatosaurus	Dorsal Vertebra	root marks
			insect pits / furrows
			score	long wide score with flaking
			score	deep medium sized score
			scores	8 crisscrossing scores in a clump
			score	long straight score with slight flaking
			score	medium sized deep score wide with a slight curve
8286	Sauropoda	Dorsal Vertebra	insect pits / furrows
			scores	2 medium sized straight thin somewhat parallel scores
			score	one small curved score intersected by flaking
5453	Apatosaurus	Caudal Vertebra	root marks
			insect pits / furrows
			score	slightly wavy score
5521	Sauropoda	Mid. Caudal Vertebra	insect pits / furrows
5452	Apatosaurus	Caudal Vertebra	score	long score with exfoliation
			root marks
			scores	3 long crissrossing wide exfoliated scores
			insect pits / furrows
5710	Apatosaurus	Caudal Vertebra	insect pits / furrows
2560	Apatosaurus	Caudal Vertebral Fragments	score	wide score with flakingat one end (could be longer)
			score	slightly wavy score with flaking on ends
		Caudal Vertebra	scores	2 small thin intersecting scores with slight flaking
			scores	2 medium-long scores not quite intersecting
			score	long thin score
			score	V-shaped score small and thin
			insect pits / furrows
			root marks
5535	Diplodocidae	Distal Caudal Vertebra	root marks
			score	wide medium sized score with lots of flaking
			serial scores	4 parallelish serial scores
			insect pits / furrows
5647	Apatosaurus	Caudal Vertebra	insect pits / furrows
			score	slightly curvy score
5653	Apatosaurus	Caudal Vertebra	insect pits / furrows
9531	Sauropoda	Distal Caudal Vertebra	insect pits / furrows
			score	medium sized score
5660	Apatosaurus	Caudal Vertebra	root marks
			score	smallish score
			insect pits / furrows
5654	Apatosaurus	Caudal Vertebra	insect pits / furrows
9528	Apatosaurus	Dorsal Vertebra	insect pits / furrows	pitting and burrows
			scores	2 possible upside down parabola shaped parallel scores both short and thick
			score	medium sized thin score
9529	Apatosaurus	Dorsal Vertebra	root marks
			score	slightly bent
			score	V-shaped score
9527	Apatosaurus	Dorsal Vertebra	insect pits / furrows
			serial scores	3 possible parallel serial scores
			root marks
			score	curved score
9695	Sauropoda	Prezygopothesis	depression	shallow long depression
			insect pits / furrows
			root marks
		Cervical Vertebra	score	shallow medium sized score
			insect pits / furrows
			root marks
			scores	2 medium sized parallel scores
			score	long score with flaking
6713	Apatosaurus	Vertebra	score	short slightly curved score
			insect pits / furrows
2874	Sauropoda	Cervical Vertebra	root marks
			insect pits / furrows
			score	smallish score
			score	medium sized straight score
			scores	2 parallel straight scores with one small score intersecting them in an H shape
			scores	2 straight parallel scores
			serial scores	3 parallel straight serial scores all short
1929	Sauropoda	Cervical Vertebra Fragment	root marks
			insect pits / furrows
			scores	2 scores small and wide
			score	one thin and slightly bent score
		Cervical Vertebra	root marks
			insect pits / furrows
1947	Sauropoda	Cervical Vertebra	scores	2 small parallel scores
			score	medium sized curved score with flaking
			scores	2 long parallel scores
			insect pits / furrows
			root marks
2724	Camarasuarus	Cervical Vertebra	score	one small straight wide score
			insect pits / furrows
9694	Sauropoda	Vertebral Fragment	score	long wide score
			insect pits / furrows
3777	Apatosaurus	Dorsal Vertebra	insect pits / furrows
9693	Sauropoda	Vertebra	root marks
			insect pits / furrows
5725	Apatosaurus excelsus	Cervical Vertebra	root marks
			insect pits / furrows
5082	Sauropoda	Cervical Vertebra	insect pits / furrows
			root marks
1224	Sauropoda	Vertebral Fragments	root marks
			score	medium sized extremely flaked score
			root marks
			insect pits / furrows
			score	flaked and exfoliated medium sized score
			insect pits / furrows
			root marks
			score	medium sized score with flaking
6601	Apatosaurus	Vertebral Fragment	scores	cluster of 4 smallish scores
			score	long thinnish score
8221	Apatosaurus	Vertebra	insect pits / furrows
			root marks
5060	Camarasaurus	Sacral Vertebra	score	small score
			score	small straight score
			insect pits / furrows	mostly pitting
3788	Apatosaurus	Cervical Vertebra	score	small straight score
			insect pits / furrows	mostly pitting
			score	medium sized thin straight score with flaking
			score	slightly wavy thin medium sized score
			score	U shaped small score
			root marks
			score	medium sized shallow score
6707	Sauropoda	Cervical Rib	root marks
			insect pits / furrows
2865	Apatosaurus	Dorsal Vertebra	score	small straight score
			insect pits / furrows	mostly pitting
			score	smallish straight score
255	Apatosaurus	Cervical Vertebra	insect pits / furrows
			root marks
			score	medium sized thin score
			score	slightly wavy score
			score	exfoliated score
3829	Sauropoda	Cervical Vertebra	root marks
			insect pits / furrows
			score	short exfolitaed score
4015	Sauropoda	Cervical Vertebra	score	small thin score
			score	small score
			serial scores	5 short serial scores
			score	thin shallow Y shaped score
			insect pits / furrows	pitting and burrowing
			score	very exfolited small score
			score	small score
			serial scores	4 parallel short-small serial scores
2796	Sauropoda	Vertebra	score	small score
			serial scores	4 serial scores small-medium sized and thin
			insect pits / furrows
			root marks
1946	Apatosaurus excelsus	Cervical Vertebra	score	zig-zag shaped score
			insect pits / furrows	mostly pitting
4198	Sauropoda	Vertebral Fragment	insect pits / furrows	mostly pitting
5659	Apatosaurus	Cervical Rib	insect pits / furrows	pitting
			score	medium sized wide score
5725	Apatosaurus	Cervical Vertebra	score	slightly wavy thin score in exfoliated area
			insect pits / furrows	insect pitting
9692	Apatosaurus	Cervical Vertebra	insect pits / furrows	insect pitting
9690	Sauropoda	Rib	score	thin medium sized score
			insect pits / furrows	mostly pitting
			root marks
			depressed puncture	exfoliated deppresed puncture
			score	long deep exfoliated score
			score	medium sized slightly curved score
			score	deep medium sized exfoliated score
			scores	5 crisscrossing thin branching scores
			serial scores	7 thin medium sized serial scores
			score	medium sized score
			score	long slightly exfoliated wide score
			score	long wide score
			score	medium sized thin score
			score	medium sized thin score
			score	wide slightly curved score
5079	Sauropoda	Rib	score	long thin exfoliated score
			score	short thin score
			scores	3 exfoliated scores short and wide
			insect pits / furrows	extreme insect pits / furrows
9689	Sauropoda	Rib	score	medium sized flaked wide score
			score	long wide exfoliated score
			serial scores	4 serial scores
5080	Sauropoda	Rib	insect pits / furrows
			root marks
9686	Sauropoda	Rib	insect pits / furrows	lots of burrowing
2683	Sauropoda	Fragment	insect pits / furrows	lots of insect pits / furrows with burrowing
9688	Sauropoda	Rib	scores	4 crisscrossing scores
			serial scores	7 thin crisscrossing serial scores
			insect pits / furrows
2718	Sauropoda	Rib	score	medium sized thick score
			score	medium sized thin score
			insect pits / furrows
			root marks
			score	slightly wavy long score
			scores	2 parallel scores
9687	Sauropoda	Rib	insect pits / furrows
5172	Sauropoda	Rib	insect pits / furrows
			root marks
3781	Sauropoda	Rib	insect pits / furrows
			score	medium sized score
			score	long wide score
			score	long wide score
2713	Sauropoda	Rib	insect pits / furrows
			scores	2 parallel medium sized score
5714	Sauropoda	Rib Fragment	root marks
			insect pits / furrows
5114	Sauropoda	Rib	insect pits / furrows
273	Apatosaurus	Rib Fragment	score	one short score
			scores	3 parallel scores in an area withh a lot of flaking
			insect pits / furrows
678	Sauropoda	Rib Fragment	serial scores	2 paralel serial scores
			scores	5 parallel scores
			insect pits / furrows
2712	Sauropoda	Rib	scores	2 parallel scores one thin one wide and both medium
			insect pits / furrows
9685	Sauropoda	Rib Fragment	scores	4 branching crisscrossing scores
			score	long exfoliated score
			root marks
			insect pits / furrows
			scores	2 parallel scores
			scores	20 overlapping somewhat parallel scores
9684	Sauropoda	Rib	score	long exfoliated score
			score	slightly curved score
3586	Sauropoda	Rib	insect pits / furrows
			root marks
3802	Sauropoda	Ischium	score	medium sized score
			scores	two long scores
			score	curved score
7404	Sauropoda	Cervical Rib	score	long score with curve in it
			insect pits / furrows
			root marks
			insect pits / furrows	a lot of insect pits / furrows
3724	Sauropoda	Limb Fragment	score	medium sized score
			scores	2 parallel smallish scores
8239	Diplodocidae	Caudal Vertebra	insect pits / furrows	slight insect pits / furrows
8468	Sauropoda	Rib	score	medium sized score
			score	medium sized wide score
283	Apatosaurus	Proximal Caudal Vertebra	score	medium sized wide score
			insect pits / furrows
9683	Apatosaurus	Proximal Caudal Vertebra	score	one medium sized score
			insect pits / furrows
3574	Sauropoda	Fragment	insect pits / furrows
5313	Camarasaurus	Ischium	scores	2 small parallel scores
			insect pits / furrows
9682	Sauropoda	Transverse Process	score	one medium sized wideish score
			scores	2 smallish parallel scores
			score	score with curve
			insect pits / furrows	lots of insect pits / furrows
			score	small straight score
			insect pits / furrows	big pit
			score	curved score
			score	long straight wide score
			score	deep wide score
9681	Sauropoda	Fragment	insect pits / furrows
1927	Apatosaurus excelsus	Cervical Vertebra	root marks
			scores	2 parallel scores one exfoliated
			insect pits / furrows
9680	Sauropoda	Fragment	score	extremely exfoliated score
9679	Sauropoda	Fragments	root marks	lots of root marks
9678	Apatosaurus	Dorsal Vertebra	insect pits / furrows
			root marks
5930	Sauropoda	Dorsal Vertebra	score	wide smallish score
			insect pits / furrows
5929	Sauropoda	Dorsal Vertebra	score	long deep wide score
			score	small-medium sized score and wideish
5083	Sauropoda	Vertebra	insect pits / furrows
6706	Sauropoda	Cervical Vertebra	insect pits / furrows
			serial scores	4 medium sized wide exfoliated serial scores
			insect pits / furrows	insect pitting and burrowing
			root marks
9677	Sauropoda	Scapula	score	medium sized wide score
			scores	2 medium sized parallel wide scores with exfoliation
			score	medium sized wideish score
9672	Sauropoda	Pubis	scores	2 paralllel medium sized scores
			score	medium sized score
818	Sauropoda	Pelvic Bone	root marks
			insect pits / furrows
621	Apatosaurus	Femur	scores	2medium sized parallel scores
			scores	6 crisscrossing scores
			scores	2 long parallle scores with 1 long score intersecting them
9671	Sauropoda	Fibula	score	one score medium sized and wideish
			depression	medium sized depression
			depression	medium sized wideish depression
			insect pits / furrows
5044	Sauropoda	Ulna	insect pits / furrows
			root marks
			score	long wideish score
			score	one medium sized wideish somewhat deep score
			score	medium sized wide score
			score	medium sized score
			score	long exfoliated score with flaking
			score	extremely long deep exfoliated score with abrasions
			score	deep medium sized score in check mark shape
			score	medium sized wide deep score
9670	Sauropoda	Radius	score	medium sized wide score
			scores	3 small - medium sized crisscrossing scores thin-wide
			insect pits / furrows
5648	Apatosaurus	Radius	scores	2 parallel scores one long and one medium sized
			scores	2 paralllel scores ranging from small to medium sized with some flaking
			score	medium sized score
			score	small shallow score
			score	small deep score
			scores	2 small-medium sized parallel wide deep scores
			scores	2 shallow medium sized parallel scores
			score	medium sized flaked score
			score	extremely deep wide medium sized score
			scores	2 parallel scores with one intersectiong them
			scores	2 medium sized parallel scores with on deep score intersecting
			score	long score
			score	3 medium sized parallel scores with one smaller wider score intersecting them
			score	short shallow score
			score	deep medium sized score
			score	2 medium-long sized scores, the long one has a bend in the middle
			striations	extremely long slightly flaked stirations
			scores	3 short scores
			scores	5 thin shallow medium sized scores
			scores	5 crisscrossing short thin scores
			scores	2 parallel scores intersecting one wide score
			score	thin score
			scores	2 parallel scores one small sized and one medium sized and exfoliated
			scores	3 parallel diagonal scores
			score	3 parallel shortish scores
			scores	3 deep scores in a patch
			scores	2 crossing scores in an x shape
			striation	long strieation with score crossing it
			score
			depressions	2 depressions and one long wide score that goes into previos section
			score
			striation	extremely long striation that goes into middle of previous section
			score	medium sized score intersecting striation
			score	medium sized score
			depression	shallow depression
			striation	deep exfoliated striation intersecting medium sized score and long striation
			score	medium sized score
			depressions	2 short parallel sdepressions
			score	extremely long score that continues into middle of next section in an arc
			score	medium sized score with flaking intersectiong previous
			score	mediumish sized shallow score crossing into next section
			score	thin shallow score
			scores	medium sized score with 2 short scores intersecting
			depression	long flaked depression
			score	long score running from middle section into second most distal section
			score	deep score
			score	deep medium sized score
			score	one exfoliated flaked score
			score	long score
			scores	2 medium sized crossing score in X shape
			scores	2 short scores in x pattern
			depression	deep depression
			score	extremely exfoliated possible long score
			root marks
			insect pits / furrows
			score	short deep score
			score	medium sized wide score
			score	medium sized score in backwards L shape
			scores	medium sized extremely wide curved scorewith short straight wide score intersecting
			score	medium sized score with root mark inside
			depression	short depression
			depression	L shaped wide depression
			score	long wide score running from middle to posterior edge and towards medial
			score	small curved score
			depression	straight depression
			depression	short wide depression with score in it
			score
5708	Apatosaurus	Fibula	score	flaked medium sized score
			score	schort score
			score	wide deep score
			depression	deep wide depression
			score	long deep score
			insect pits / furrows
5905	Apatosaurus	Cervical Vertebra	scores	2 partial parallel score
			score	small deep score
			depression	long depression
			depression	long depression
8356	Apatosaurus	Metatarsal	pits	2 pts almost directly next to each other could have crushing marks but surface is very exfoliated
8355	Apatosaurus	Metatarsal	insect pits / furrows
9662	Sauropoda	Rib	score	medium sized score
			root marks
9661	Sauropoda	Tibia	score	deep small score
			score	medium sized wide score
2530	Camarasaurus	Metacarpal	score	medium sized deep wide score
			insect pits / furrows
9660	Camarasaurus	Scapula	depression	long wide depression
			score	medium sized wide score
			score	deep wide score
			insect pits / furrows	lost of remarkable well defined burrow marks
5630	Sauropoda	Rib	score	medium sized thin score
			insect pits / furrows	pitting and burrowing
9664	Sauropoda	Rib	insect pits / furrows
5906	Sauropoda	Rib	root marks
			score	curved medium sized exfoliated score
			score	deep small score
9663	Sauropoda	Rib Fragment	score	small exfoliated score
			score	thin medium sized score
			insect pits / furrows
9655	Sauropoda	Rib	root marks
			insect pits / furrows
			score	14 mostly parallel scores
9659	Sauropoda	Vertebra	root marks
			insect pits / furrows
			score	short score
9650	Sauropoda	Neural Spine	score	medium sized wide score
			insect pits / furrows
9657	Sauropoda	Fragment	root marks
			insect pits / furrows	insect pitting
			score	small score
			scores	3 parallelish scores
9562	Sauropoda	Haemal Arch	insect pits / furrows
			score	wide exfoliated medium sizd score
9668	Sauropoda	Fragment	root marks
			score	curved wavy score
9651	Sauropoda	Fragment	root marks
9666	Sauropoda	Fragment	insect pits / furrows
3726	Sauropoda	Fragment	insect pits / furrows
9665	Sauropoda	Caudal Vertebra	insect pits / furrows	insect pitting
9669	Sauropoda	Rib	score	medium sized score
9658	Sauropoda	Fragment	insect pits / furrows
9647	Apatosaurus	Rib	depression	deep depression
			insect pits / furrows
9648	Sauropoda	Rib	insect pits / furrows
9649	Sauropoda	Rib	insect pits / furrows
9652	Sauropoda	Rib	scores	2 short scores
			score	2 curved scores
9667	Sauropoda	Fragment	insect pits / furrows	lots of insect pitting
9653	Sauropoda	Rib Fragments	insect pits / furrows
			score	small thin score
			score	short score
			root marks
3725	Apatosaurus	Ischium	serial scores	4 small parallel serial scores
			insect pits / furrows
9654	Sauropoda	Fragment	depression	medium sized wide depression
			root marks
			score	medium sized score
			insect pits / furrows
			score	medium-small sized score
			score	medium -long sized score
			depression	medium sized depression
5482	Diplodocidae	Sacral Neural Spine	score	medium sized score
			score	medium sized score
			score	medium-long wavy score
			score	medium to long curvy wide score
			scores	5 crisscrossing scores
			scores	2 criscrossing scores
			score	long score
			score	long score
			insect pits / furrows
8525	Apatosaurus	Fragment	root marks
			scores	2 parallelish scores
			score	thin shallow branching score
8519	Diplodocidae	Astragalus	root marks
			insect pits / furrows
6712	Apatosaurus	Gastralia	insect pits / furrows	3 insect pits
			insect pits / furrows	1 burrow
9646	Sauropoda	Fragment	insect pits / furrows
			score	medium sized score
8522	Sauropoda	Limb Fragment	score	long score partially exfoliated
			insect pits / furrows
5921	Sauropoda	Rib	insect pits / furrows
			root marks
8234	Apatosaurus	Cervical Vertebra	insect pits / furrows	4 lines of burrows
			root marks
			score	long wide score
			insect pits / furrows	insect pitting and burrows all over specimen
5923	Sauropoda	Rib	root marks
			insect pits / furrows
9645	Sauropoda	Rib Fragments	insect pits / furrows
			insect pits / furrows	6 parallel burrows
			insect pits / furrows	lots of burrows
			score	medium sized exfoliated score
			score	small Z shaped score
			score	medium sized exfoliated score
9644	Sauropoda	Fragment	insect pits / furrows	a lot of insect pits / furrows
			pits	6 pits in almost parallel 2 rows
			insect pits / furrows	medium sized line of insect burrows
8719	Sauropoda	Limb Fragment	scores	2 extremely exfoliated scores unable to measure
			insect pits / furrows
9640	Sauropoda	Metatarsal	insect pits / furrows
			score	small score
			scores	2 parallel small scores
9641	Sauropoda	Fragment	insect pits / furrows	large areas of insect burrows in long lines
			insect pits / furrows	a lot of insect pits / furrows
8720	Sauropoda	Rib	root marks
			score	small slightly curved score
			score	long flaked score
4012	Sauropoda	Limb Fragment	score	long score
			insect pits / furrows
			score	medium sized score
2715	Sauropoda	Limb Fragment	score	medium sized wide deep score
			score	long flaked score
			score	medium sized flaked score
			score	small score
			depression	medium sized deppression
			scores	4 crisscrossing scores
9642	Sauropoda	Limb Fragment	score	medium sized wide flaked score unable to measure due to positioning
			insect pits / furrows
9643	Sauropoda	Pubis Fragment	insect pits / furrows
			score	wide score
2717	Sauropoda	Fragment	insect pits / furrows
			root marks
5088	Sauropoda	Fragment	insect pits / furrows
			root marks
3817	Apatosaurus	Cervical Rib	serial scores	4 parallel serial scores
			insect pits / furrows
			root marks
			scores	2 medium sized parallel scores
			score	smallish score
			score	long score
			score	slightly curved mediumish score
5718	Sauropoda	Neural Spine	insect pits / furrows
9638	Sauropoda	Fragment	insect pits / furrows
			root marks
5057	Sauropoda	Fragment	insect pits / furrows
5063	Sauropoda	Fragment	insect pits / furrows
			root marks
3821	Apatosaurus	Dorsal Transverse Process	scores	2 possible scores in extremely exfoliated area
9639	Apatosaurus	Cervical Rib	insect pits / furrows
			root marks
5176	Apatosaurus	Neural Spine	score	long score
			insect pits / furrows
5069	Sauropoda	Fragment	root marks
5052	Diplodocidae	Dorsal Vertebra	insect pits / furrows	pits and burrows
			root marks
			score	medium sized wide score
			score	short thin score
			score	2 parallel scores
			score	one medium sized wide score
5569	Diplodocidae	Proximal Caudal Vertebra	insect pits / furrows
			score	small score
			score	medium sized score
5341	Diplodocidae	Caudal Vertebra	score	exfoliated score
			insect pits / furrows
9636	Sauropoda	Distal Caudal Vertebra	insect pits / furrows	a lot of insect pits / furrows with intertwinning burrows
			scores	2 parallel medium sized score with 1 small curved score in between
628	Sauropoda	Vertebra	insect pits / furrows
3797	Diplodocus	Distal Caudal Vertebra	score	small-medium sized score
			insect pits / furrows
			score	deep exfoliated score
9637	Sauropoda	Vertebra	root marks
			insect pits / furrows
5910	Sauropoda	Dorsal Vertebra	insect pits / furrows
7270	Sauropoda	Limb Fragment	insect pits / furrows
			score	posible long score with lots of exfoliation unable to measure
9632	Apatosaurus	Dorsal Vertebra	insect pits / furrows
			root marks
			score	long exfoliated score with numerous bends
5077	Camarasaurus	Mid Caudal Vertebra	score	medium sized score
			insect pits / furrows
683	Sauropoda	Vertebra	insect pits / furrows
5342	Diplodocidae	Dorsal Vertebra	insect pits / furrows
5007	Sauropoda	Vertebra	insect pits / furrows
			root marks
9631	Sauropoda	Mid Caudal Vertebra	insect pits / furrows
			root marks
			score	mediumish sized score
8524	Sauropoda	Cervical Vertebra	score	one long score with flaking
			score	medium sized score
			scores	2 parallel scores
			insect pits / furrows
8525	Sauropoda	Cervical Vertebra	scores	10 crisscrossing scores
			score	medium sized score
			insect pits / furrows
			scores	3 medium parallel scores
2583	Sauropoda	Rib	insect pits / furrows	pitting and burrows
			score	short deep score
8448	Sauropoda	Rib	insect pits / furrows
			root marks
			score	medium sized wide score
			score	long score
6702	Sauropoda	Rib	insect pits / furrows
			root marks
			insect pits / furrows
			root marks
			insect pits / furrows	pitting with lots of burrows
			root marks
			insect pits / furrows
			root marks
			score	medium sized score
			score	medium sized score
			insect pits / furrows	with lots of burrows
			score	wide medium sized exfoliated score
			score	wide short score with exfoliation
			root marks
			pit	exfoliated pit
			score	deep wide medium sized score
5685	Sauropoda	Dorsal Vertebra	insect pits / furrows
			root marks
8521	Sauropoda	Rib	insect pits / furrows
			score	really deep long wide score
9561	Apatosaurus	Rib	insect pits / furrows
			root marks
5017	Diplodocidae	Femur	insect pits / furrows
			root marks
			score	medium sized score
			scores	2 medium crossing scores in X shape
2716	Sauropoda	Limb Fragment	scores	2 small parallel scores
			scores	2 parallel scores
			insect pits / furrows
3780	Apatosaurus	Pubis	insect pits / furrows
			serial scores	3 flaked wide parallel serial scores
			scores	2 long parallel scores running below id tag
			score	medium sized score
			score	Y shaped score with medium sized score intersecting
			scores	2 long flaked scores in X shape
			score	medium sized wide score
			scores	2 parallel long wide scores
			scores	2 parallel short scores
			striations	long striations
			scores	3 small scores
			root marks
9627	Sauropoda	Fragment	insect pits / furrows
9626	Sauropoda	Fragment	insect pits / furrows
2879	Sauropoda	Epipodial	scores	2 exfoliated wide parallel scores
			insect pits / furrows	extreme insect pitting
6717	Sauropoda	Vertebra	insect pits / furrows
6715	Sauropoda	Vertebra	insect pits / furrows
5058	Sauropoda	Limb Fragment	scores	3 small-medium scores
			insect pits / furrows
5929	Sauropoda	Dorsal Vertebra	root marks
			insect pits / furrows
			score	medium sized score intersected by shortish score
			score	long wide score in very exfoliated area
			score	short deep score
5922	Sauropoda	Astragalus	insect pits / furrows
2707	Sauropoda	Coracoid	insect pits / furrows
			serial scores	4 somewhat parallel serial scores
1092	Sauropoda	Vertebra	serial scores	4 possible parallel serial scores in extremely exfoliated area
2539	Sauropoda	Vertebra	scores	medium thin score
			insect pits / furrows
			root marks
			score	long score with bends
			scores	4 medium sized mostly parallel score
			score	long wavy exfoliated score
2631	Sauropoda	Vertebra	root marks
			scores	4 crisscrossing scores
1948	Sauropoda	Limb Fragment	score	wide score
			pit	big pit with exfoliation possible punture
			insect pits / furrows
			score	medium sized wide score
			score	long wide score
			pit	small pit
9625	Sauropoda	Fragment	insect pits / furrows
8049	Sauropoda	Caudal Vertebra	insect pits / furrows
9624	Sauropoda	Fragment	insect pits / furrows
			root marks
9629	Sauropoda	Dorsal Vertebra	serial scores	3 parallel scores
			score	wide exfoliated score
			score	thin exfoliated score
			insect pits / furrows
5169	Sauropoda	Neural Arch	insect pits / furrows
9628	Camarasaurus	Cervical Vertebra	insect pits / furrows
			root marks
9630	Sauropoda	Fragment	insect pits / furrows
5922	Sauropoda	Astragalus	score	small curved wide score
7271	Sauropoda	Sacrum	insect pits / furrows
9622	Camarasaurus	Fragment	insect pits / furrows
9623	Sauropoda	Fragments	insect pits / furrows
			root marks
7411	Sauropoda	Vertebra	insect pits / furrows
9621	Sauropoda	Dorsal Vertebra	insect pits / furrows
			root marks
			insect pits / furrows	mostly pitting
			insect pits / furrows
			striations	long striations
			score	medium sized score exfoliated at one end
			insect pits / furrows
			root marks
2864	Camarasaurus	Dorsal Vertebra	score	smallish score
			insect pits / furrows
			insect pits / furrows
2842	Camarasaurus	Limb Fragment	insect pits / furrows
5907	Camarasaurus	Vertebral Fragment	insect pits / furrows
			score	curved wide score
			score	thinish wavy score
			score	short thin score
5081	Camarasaurus	Fragment	insect pits / furrows
1445	Camarasaurus	Vertebral Fragments	serial scores	7 parallel serial scores
			serial scores	7 interwoven serial score
			insect pits / furrows
2886	Apatosaurus	Coracoid	depression	wide depression
			score	wide score
			score	medium sized score
			insect pits / furrows
2547	Sauropoda	Fragment	root marks
5168	Sauropoda	Coracoid	insect pits / furrows
5931	Diplodocidae	Femur	insect pits / furrows
1944	Sauropoda	Fragment	score	Long score with possible very faint serrations at the tapered tip
			pit	Small, shallow pit
			insect pits / furrows	Small, concentrated area of insect pits / furrows
			score	Short, narrow score crossing very wide one at one end
			score	Bent score
			score	Straight, wider score crossing very long, wide score
			striated score	Very long, wide score with striations along part of the length
			score	Long, narrow, mildy curved score running lengthwise up from widest end of Bone to first glued crack.
5180	Sauropoda	Fragments	pits	3 very flaked pits
			prep damage	prep damage
			insect pits / furrows
			score
3826	Sauropoda	Vertebral Fragment	score	Faint, narrow V shaped score
			score	Faint score running width wise under ID
			score	1 extremely flaked score
5209	Sauropoda	Fragment	score	Straight, narrow score
			score	Curved, slightly flaked score
			score	3-4 possible scores, but all are very flaked and discontinuous
4218	Sauropoda	Fragment	insect pits / furrows	Large area of concentrated insect pitting
			score	score in the shape of x^3 graph
2201	Sauropoda	Vertebral Fragment	score	Only possible score is extremely faint and flaked
8466	Sauropoda	Vertebral Fragment	score	1 Deep, short score
			score	Short, curved score
			score	Partial straight score
		Vertebral Fragment	score	Short, mildy curved score
5097	Sauropoda	Vertebral Fragment	puncture	Round puncture with Bone crushing on edges
266	Apatosaurus	Vertebral Fragment	serial scores	Cluster (might be serial) of 9 scores that are generally paralles, but overlapping at shallow angles
			pit	Large pit with flaking
			scores	2 short, straight, coverging scores
			serial scores	Set of 4 serial scores
			scores	2 nearly parallel scores. Short and straight
			score	Gently curved score
			scores	8+ overlapping, narrow scores
			scores	11+ narrow, crosshatched and overlapping scores
316	Sauropoda	Fragment	insect pits / furrows	Odd perfectly straight line of insect pits. Sinlge line breaks into two parallel lines. pits are nearly exactly the same shape & size.
		Fragment	scores	3 parallel, short, flaked scores
3859	Sauropoda	Fragment	score	Narrow, shallow score
			score	Straight, short score
			scores	2 wider, not quite parallel scores
3846	Sauropoda	Vertebral Fragment	score	1 twice bent score
5210	Sauropoda	Fragment	score	Partial, straight sscore with flaking
			score	Very shallow straight score
6646	Sauropoda	Fragment	score	Long, narrow score with many curves
8546	Sauropoda	Vertebral Fragment	score	Long, narrow score
2863	Sauropoda	Vertebral Fragment	score	Lonng, wide, partial score
			scores	2 parallel, curved, flakey scores
			score	Long, curved score
			score	Wide, shorter score
			score	Long, wide score
			scores	2 parallel scores
			score	Very curved score
			score	score bent on one end
			score	score bent at one end
			score	Wide, short score
4186	Sauropoda	Fragment	score	Long, narrow score
3793	Camarasaurus	Vertebral Fragment	score	2 parallel scores, extremely narrow, & curved
			score
			score	1 partial, fairly straight score
4219	Sauropoda	Vertebral Fragment	insect pits / furrows	15+ scattered insect burrows
			score	2 parallel scores w/ a related pit
			score
			pit
			serial scores	Set of 3 serial scores. scores are slightly curved.
3831	Sauropoda	Zygopothesis	scores	Up to 5 deep wide, VERY exfoliated scores, measurements may be off due to exfoliation
			score	3 short and 5 long somehwat parallel, wide, extremely exfoliated scores
			score
			score
			score
			score
			score
			score
			score
3827	Sauropoda	Vertebral Fragment	serial scores	Set of 9 serial scores
			serial scores	Set of 5 short, narrow serial scores
			score	Set of 2 parallel scores perpandicular to set the set of 5
			score
4197	Sauropoda	Vertebral Fragment	score	Set of 3 long, narrow scores
			score
			score
4327	Sauropoda	Fragment	score	1 straight score
6609	Sauropoda	Neural Spine	score	4 very narrow scores
			score
			score
			score
8498	Sauropoda	Distal Caudal Vertebra	pit
			pit
4343	Sauropoda	Fragment	insect pits / furrows	Very heavy insect pitting across entire side opposite from ID tag
2735	Sauropoda	Neural Arch	score	Straight, discolored score
3636	Sauropoda	Distal Caudal Vertebra	score	2 narrow, very short parallel scores
			score
4024	Sauropoda	Distal Caudal Vertebra	scores	5 overlapping, short scores
			scores	Up to 10 branching and overlapping scores
9635	Sauropoda	Distal Caudal Vertebra	scores	Cluster of 13 overlapping scores
			scores	Cluster of 5 overlapping, straight scores
9634	Sauropoda	Distal Caudal Vertebra	score	2 short, shallow, parallel scores
			score
			score	Short, shallow, straight score
876	Sauropoda	Vertebral Fragment	score	2 narrow, diverging scores
			score
3863	Sauropoda	Vertebral Fragment	score	Narrow, "V" shaped score
7300	Sauropoda	Distal Caudal Vertebra	score	Straight score, deeper at one end
			score	2 Gently curved scores
			score
5474	Sauropoda	Neural Spine	insect pits / furrows	Area of concentrated insect burrows, 10+
			insect pits / furrows	Area of concentrated insect burrows all overlapping
8347	Sauropoda	Vertebral Fragment	Puncture	Very large puncture with visible Bone crushing around edges
			score	Smooth, exfoliated score
			insect pits / furrows	Concentrated area of insenct pits
5542	Sauropoda	Rib	insect pits / furrows	Very heavy insect pits / furrows all over
5544	Sauropoda	Rib	score	Shorter, straight wide score
			score	2 very short, parallel scores
			score
			pit	medium pit
			pit	larg pit
			furrow	Exfoliated furrow
			furrow	Slightly flaked, smooth furrow
5561	Sauropoda	Rib	score	2 not parallel, very flaked scores
			score	Short, relatively narrow score
			score	score bent sharply in middle
			score	Short, narrow score
5551	Sauropoda	Rib	serial scores	Set of 5 worn, narrow, short serial scores. (many more than 5 scores present, but area is very exfoliated & others are more flakes than anything at this point)
			score	Very short, straight score
			score	Flaked score
			scores	Cluster of 9 overlapping, short, flaked scores
			score	Short, narrow score
			insect pits / furrows	Single file line of 6 insect pits
5550	Sauropoda	Rib	score	Gently curved, shallow score
			insect pits / furrows	2 parallel insect burrows
			score	Short, straight score
5651	Sauropoda	Rib	score	Short, narrow, straight score
5548	Sauropoda	Rib	pit	One large pit
			furrow	Very short, smooth furrow
			score	1 flaked slightly curved score
5558	Sauropoda	Rib	scores	2 faint, short, parallel scores
			furrow	Long, shallow furrow
			furrows	3 small, smooth furrows
			score	Straight, long, flaked score
			scores	2 Narrow, short, parallel score
			score	two narrow, short, parallel score
			score	Long, wide score
			scores	Cluster of 7 scores in small area
			score	Wider, exfoliated score
			scores	three short, straight scores
			pits	8 small, smooth pits
			scores	Two parallel very shallow and narrow scores
			furrow	small, shallow furrow
			score	Narrow, flaked score
			score	Very long, narrow score with single striation
			score	Very long, narrow, curvy score
			score	Short, narrow score
			scores	Two very narrow, faint, parallel scores near ventral edge
3861	Sauropoda	Rib	score	Extrememly deep, wide score
			score	Shorter, shaolower score
			score	Long, very winding score
			score	Narrow, short, curved score
6608	Sauropoda	Rib	scores	14 very short, very deep scores. Clustered, not serial
			scores	2 partial, narrow, parallel scores
			score	Slightly curved score
			score	Slightly curved, wider score
			scores	Three somewhat parallel scores (short and flaked)
			scores	Set of 6 partial serial scores
			serial scores	Set of 4 serial scores
			pits	3 similar sized and 1 large pit
			striations	Large set of striations with 7-8 lines
			scores	Set of 6 very long, very deep, evenly spaced scores just above ID tag
			striations	Large area with striations
			striations	Somewhat exfoliated striations over 3 of the 6 deep, parallel scores above ID tag ( two entries up)
5107	Sauropoda	Rib	score	Long, straight, very shallow & narrow score
270	Sauropoda	Rib	scores	2 extrememly narrow, diverging scores
			score	Flaked score
			scores	2 thin scores
			score	Wide, short score
4294	Sauropoda	Rib	score	Wide, short score
			striation	Very narrow striation (only 2 striation lines beside main)
			score	Shallow, narrow score
			score	Partial, flaked score
			scores	Two slightly offset, parallel scores
			scores	Long, wide score
			striations	Partial, very faint and shallow striations
			scores	Cluster of very shallow, narrow, mostly parallel scores
3626	Sauropoda	Rib	score	long, backwards "S: score
			scores	Four shallow, short scores
			scores	3 narrow, curvy scores
2213	Sauropoda	Fragment	scores	10 very short scores
			striated scores	4 nearly parallel, slightly overlapping striated scores
4250	Sauropoda	Cervical Rib	score	Partial, narrow score
			score	Partial score
			score	Longer, narrower score
			score	Partial, long, wide, exfoliated score
			score	Short score with a pit at end
			pit
			pit	Small pit under ink
5662	Sauropoda	Rib	scores	3 very small scores
			serial scores	Set of 5 serial scores
			score	Short, discolored score
			scores	4 Short, wide scores
			scores	Two short, parallel scores
			scores	2 short, deep scores
			scores	cluster of 5 short scores
			scores	Cluster of 6 slightly curvy, parallel scores
			scores	2 perpandicular scores
			scores	2 Very long, not quite straight scores
			scores	Cluster of 5 shorter, deep scores
			scores	2 very flaked, parallel scores
			scores	Cluster of 5 medium length, DEEP scores
			scores	Cluster of 5 short scores
			scores	Extrememly dense cluster of ~30 very short, fairly narrow scores
5656	Sauropoda	Rib	striated scores	2 very short, converging, partial scores. Extremely shallow
			scores	2 short, unrelated scores
			scores	Short, narrow score
			score	Wide score
			score	Straight, very shallow score
			score	Very shallow, partial, straight score
			score	Very shallow, partial, straight score
			score	Partial straight, narrow score
			abrasion	Covered in exactly parallel, very narrow scores
			scores	2 almost parallel score
			scores	2 scores in a short "V"
			score	Long, straight score
			score	Short, straight score
			scores	4 narrow, clustered scores
			score and striation	Extrememly wide, long striated score w/ Single score running parallel along length
			scores	4 unrelated scores clustered on side of striation
			score	Short, slightly curved score
			score	Long, flaked score
3571	Sauropoda	Fragment	score	Shallow, partial score
4227	Sauropoda	Rib	score	Flaked, short score
			root marks	root marks covering side without ID tag
			score	Very wide, curvy score
			scores	2 parallel score
			score	4 short, parallel scores
			scores	2 short, parallel scores
			scores	1 long, 1 short score
3856	Sauropoda	Rib	scores	2 very narrow, short scores
3758	Sauropoda	Rib	score	Long, narrow score
			score	Longer, very narrow, curvy score
			scores	2 scores in steep "V" shape
948	Sauropoda	Fragment	score	Shallow, narrow, bent score
677	Sauropoda	Rib	scores	Cluster of ~17-20 long, narrow, parallel scores running lengthwise
4335	Sauropoda	Fragment	score	Very flaked, partial score
677	Sauropoda	Fragment	score	Partial score that widens from one end to the other
5188	Sauropoda	Rib	score	Very shallow, somewhat exfoliated score
			striated furrows	3 long, wide depressions with extrmemly shallow striations
			score	Partial, narrow score
677	Sauropoda	Fragments	score	Narrow, short score
			scores	2 straight, converging scores
			score	partial score that tapers at one end
			score	shallow, gently curved score
			score	partial score crossing a crack
2939	Sauropoda	Fragment	score	very shallow, narrow score
			score	Flaked, partial score
			score	Long, deep score
			score	short, wide score
			score	short, straight score
1930	Sauropoda	Rib	score	curved, tapering score
			depression	Wide, relatively deep depression
			depression	Slightly more narrow depression
2710	Sauropoda	Rib	score	shallow, straight score
2203	Sauropoda	Rib	score	Long, very narrow score
			striated score	Long, very shallow and narrow score with 1-2 partial length striations
			score	Long, straight, narrow score with small pauses along length
2526	Sauropoda	Rib	striated score	Curved score w/ 2-3 shorter, shallow striations
			score	narrow, shallow score
			scores	2 very curved, meandering score
5712	Sauropoda	Rib	score	short, wide score
			scores	3 roughly parallel, short, meandering scores
5074	Sauropoda	Rib	score	partial, curved score
			score	Extrememly narrow, long, overlapping scores
3572	Sauropoda	Rib	score	very long, slightly curved score
			score	Short, U shaped score
6670	Sauropoda	Rib	score	Long, narrow score
			score	Short, narrow score
			score	Long, wider score
			score	long, curved score
			striations	Set of 2 striations
6637	Sauropoda	Rib	score	Very short, narrow score
			depression	Cone shaped depression
			depression	Extrememly short, narrow depression
2206	Sauropoda	Rib	depression	short, shallow depression
			score	flaked, narrow score
4295	Sauropoda	Rib	scores	cluster of 8 overlapping, narrow scores
			score	Short, straight score
			serial scores	Set of ~19 serial scores that are almost perfectly parallel and very similar sizes w/ a couple short scores mixed in
			serial scores	Set of 4 short serial scores
			scores	Cluster of ~20+ perfectly parallel, long, overlapping scores. Can't distinguish where one ends or one starts, so giving area affected instead of ranges
2720	Sauropoda	Rib	scores	2 parallel, narrow scores
			score	Very narrow, straight score
			score	short, narrow score
			score	Long, gently curved score interuppted in middle by flake
			score	Shallow, faded score
			pit	Very large pit
3569	Sauropoda	Rib	striation	Partial serration
			scores	2 short, converging scores
			score	Wider, slightly curved score
			score	short, staight score
			score	deep wide score. May have parallel partner score, but large flake is obscurring
			score	narrow, long score converging with short, wider score
			score	Narrow, meanderingly curved score
3825	Sauropoda	Sacral Rib	serial scores	Set of 5 serial scores. ID glued overtop and obscurring one end so lengths are too short by up to `2mm
			score	Short, straight score
			score	Long, narrow, straight score
			score	bent, narrow score
			scores	Long wide score crossed by 2 narrow parallel scores
			score	straight, tapered score
			serial scores	Set of 5 perfectly parallel serial score/abraision marks/striation. Fairly shallow, varying widths
4236	Sauropoda	Rib	score	very short score
			insect pits / furrows	Small area of very concentrated insect pits, ~9
2205	Sauropoda	Fragments	score	Short, curved score
5067	Sauropoda	Fragment	scores	Cluster of 3 short, curved scores
			scores	2 long, narrow scores forming a "T"
			scores	2 long, parallel, bent scores
3569	Sauropoda	Rib	scores	2 narrow, almost parallel scores
			score	Long, straight score
			score	wide score
			score	Long, wider, straight score running lengthwise
			score	Narrow, straight score
			score	long, straight score
3630	Camarasaurus grandis	Dorsal Vertebra	etching	smooth edged
			etching	botom etching
5196	Camarasaurus	Dorsal Vertebra	puncture	juvenile specimen
4346	Apatosaurus	Cervical Vertebra	root marks	2 elements with possible root etching
			insect pits / furrows	1 element with possible insect pits / furrows, however surface condtion is all poor
7289	Sauropoda	Rib	insect pits / furrows	covers huge smooth of Bone surface near label and on opposing side, insect pits / furrows 1/2 down on # side sinuous
			scores	2 scores on far end from ID tag
7288	Sauropoda	Rib	abrasion	whole surface is covered with fine, linear striations
			score
7281	Sauropoda	Vertebral Process	abrasion	surface is in rough shape
			prep damage
8559	Sauropoda	Vertebral Fragment	prep damage	4 pieces, largest with prep damage
5051	Camarasaurus	Pubis	scores	at least 3 scores, 1 furrow? On both sides
3610	Camarasaurus	Haemal Arch	score	surface condition poor, 2 possible scores
7269	Sauropoda	Vertebral Fragment	scores	2 scores
7264	Sauropod	Dorsal Vertebra	score	surface condition poor, 1 score
5089	Apatosaurus	Vertebral Fragments	pit	1 possible pit on the smallet Fragment
3580	Apatosaurus	Neural Spine	etching	modern root etching
			prep damage
3579	Apatosaurus	Limb Fragment	scores	several scores on intact side, including 2 striated ones
5095	Apatosaurus	Haemal Arch Fragment	pits	pits
3565	Apatosaurus	Vertebra	insect pits / furrows	insect pits / furrows
4195	Apatosaurus	Vertebra Zygopothesis	etching	modern root etching
6823	Apatosaurus	Cervical Rib	pits	pits
4319	Apatosaurus	Fragments	scores	larger Fragment has multiple scores, 3 serial
5698	Apatosaurus	Cervical Rib	pits	2 pits on largest Fragment
			insect pits / furrows	insect pits / furrows on 2nd largest Fragment
317	Apatosaurus	Cervical Rib	score	1 large score, obscured by glue, largest piece
3589	Apatosaurus	Partial Zygapophysis	score	1 score
			pits	several possible pits on side opposing tag
3561	Apatosaurus	Neural Arch	scores	possible scores on narrowest surface
3587	Apatosaurus	Rib	scores	several scores, especially on larger Fragment to left of ID tag
4235	Apatosaurus	Cervical Vertebra	score	1 large score on process, obscured with glue and sharpie line
6614	Apatosaurus	Rib	scores	large scores on largest Fragment, below tag
5049	Apatosaurus	Haemal Arch	pit	1 pit
			insect pits / furrows
			scores	1 score on side near tag, 2 sets of larger, serial scores on opposing side
1925	Apatosaurus	Cervical Rib	pits	juvenile, pits on larger Fragment
4184	Sauropoda	Cervical Vertebra	pits	patch of pits on posterior surface at process
3639	Sauropoda	Vertebral Fragment	insect pits / furrows	insect pits / furrows
			score	score on surface with tag
9633	Camarasaurus	Dorsal Vertebra	puncture	large puncture
			fractures
2535	Sauropoda	Cervical Rib	scores	surface quality is poor, possible scores
2734	Sauropoda	Dorsal Vertebra	prep damage	surface quality is poor, possible prep damage
3739	Apatosaurus	Cervical Vertebra	pits	pits
5072	Apatosaurus	Vertebra	insect pits / furrows	juvenile specimen
2532	Sauropoda	Haemal Arch	scores	surface condition is poor, maybe 2 scores
3731	Sauropoda	Haemal Arch	insect pits / furrows	surface condition is poor
2923	Sauropoda	Haemal Arch	score	one score
			pits	2 pits
4298	Sauropoda	Haemal Arch	insect pits / furrows
			score
			root marks	modern root damage
3765	Sauropoda	Haemal Arch	serial scores	3 large serial? scores, some with striations
5071	Sauropoda	Haemal Arch	insect pits / furrows	insect traces?
6973	Sauropoda	Haemal Arch	serial pits	serial pits
8303	Sauropoda	Haemal Arch	score	1 score?, near margin as flaking, unclear
2532	Sauropoda	Haemal Arch	scores
5050	Apatosaurus	Haemal Arch	pits
			scores
5450	Sauropoda	Haemal Arch	pits
			scores
6971	Sauropoda	Haemal Arch	insect pits / furrows
3564	Apatosaurus	Haemal Arch	scores
2733	Camarasaurus	Haemal Arch	scores
2929	Apatosaurus	Haemal Arch	scores
8695	Sauropoda	Vertebral Fragment	scores	possible scores, surface in heavily textured
8500	Sauropoda	Vertebral Fragment	pits	pits
8043	Sauropoda	Haemal Arch	pits	several pits
			score
8712	Sauropoda	Rib	score	1 score
			punctures	2 punctures
8692	Sauropoda	Fragment	pits	small pits
			scores
8696	Sauropoda	Rib	insect pits / furrows	insect pits / furrows on largest fragmen
			scores	scores on 3rd largest Fragment
8703	Sauropoda	Fragment	scores	scores
5679	Sauropoda	Rib	scores	score on middle sized frament, other surfaces too poor quality
9620	Sauropoda	Cervical Rib	score	all from the same field jacket
9618	Sauropoda	Pelvic Bone	scores	Large Bone Fragment with numerous scores
2877	Sauropoda	Tibia	scores	proximal Fragment with numerous scores, a striated score and insect pitting damage
			insect pits / furrows
			striated score
3588	Sauropoda	Rib	insect pits / furrows	clusters of pitting on longest piece
9616	Sauropoda	Rib	insect pits / furrows	round and ovoid pitting cluster
827	Sauropoda	Rib	depressions	two shallow depressions
			insect pits / furrows	clusters of insect pitting and furrows
9617	Sauropoda	Rib	insect pits / furrows	pitting on distal piece, pleurocoels present on proximal piece
9619	Sauropoda	Rib	insect bioglyphs	linear pits leading into a large pit cluster
			insect pits / furrows
3777	Sauropoda	Dorsal Vertebra	furrow	faint furrows on mulitple surfaces, no striations visible, lots of cortical Bone flaking present
261	Sauropoda	Rib	prep damage
			striations	nice striations
2711	Sauropoda	Rib	scores	still in field jacket, LOTS of scores on all sides, some insect pits and linear pitting damage
			striated scores
			insect pits / furrows
			insect bioglyphs
3560	Sauropoda	Rib	insect pits / furrows	flaking is obscuring a possible score on one of the smaller pieces. The largest piece has lots of insect pitting damage
			score
3853	Sauropoda	Rib	score	short and deep score
			insect pits / furrows	small amount of insect pitting near distal breakline
3810	Sauropoda	Rib	insect pits / furrows	Rib Fragment in 2 pioeces, insect pitting along ridge, near break at distal margin of larger piece
			insect pits / furrows	small piece has insect pits along the Spine
3815	Sauropoda	Rib	scores	smaller Fragment has two parallel scores (?serial) and insect pitts
			insect pits / furrows
2208	Sauropoda	Sternal Plate	insect pits / furrows	insect pitting around margins of both sides, heavy concentration on the deep surface, near the distal tip.
			scores	Numerous short and shallow scores on the external surface
9614	Sauropoda	Fragment	striations	flat Bone (?partial sternal plate) some striations on external surface. Near center of east side of shelf
4332	Apatosaurus	Sacral Rib	serial scores	two sets of serial scores on small Bone Fragment on backside of main "nice" Bone area
5106	Sauropoda	Rib	scores	small shallow scores
			insect pits / furrows	scattered insect pits / furrows
4321	Sauropoda	Vertebral Fragment	insect pits / furrows	insect pitting just above id tag
9613	Sauropoda	Proximal Rib Fragment	insect pits / furrows	a lot of insect pitting on anterior surface, distal to the Rib head
9615	Sauropoda	Rib	scores	Many scores and striations, some criss-cross each other. scores present on both sides.
			striations	A very long striation, runs almost the lenght of the Bone
4331	Sauropoda	Fragment	scores	faint scores on narrow end of Fragment
3791	Sauropoda	Fragment	scores	a couple of long scores
			striations
9560	Sauropoda	Pubis	scores	very flaky surface
5183	Sauropoda	Scapula	striations	large Bone Fragment with faint serrations near ID tag
			furrows	deep and short furrows on opposite side
8291	Sauropoda	Caudal Vertebra	scores	several scores along exterior of Centrum.
			insect pits / furrows	Insect pitting is pervasive on Centrum and into pleurocoels
2876	Sauropoda	Fragment	score	strong score on opposite face of insect pits / furrows
			insect pits / furrows	cluster of insect pitting on anterior face
9557	Sauropoda	Rib	scores	numerous scores and striations on two distal pieces, some are very long and criss cross each other. On the distal-most piece, there is one score with striations that appears to end in a pitted pattern
			striations
			insect pits / furrows
5170	Sauropoda	Vertebral Fragments	insect pits / furrows	articulated Vertebral Fragments. Large aresas of insect pitting within multiple pleurocoels
5693	Sauropoda	Fibula	insect pits / furrows	very flaky Bone surface, some insect pitting at the distal end
5073	Sauropoda	Neural Spine	insect bioglyphs	puncutated linear insect pits / furrows on anterior face
3773	Sauropoda	Limb Fragment	scores	possible scores, but they may be obscured by some prep damage
			insect pits / furrows	widespread insect pits / furrows
			prep damage
2547	Sauropoda	Fragment	score	long, curved score on surface with id tag - shoulder area Bone?
9558	Sauropoda	Cervical Vertebra	insect pits / furrows	not much surface Bone left, but some insect pitting in the pleurocoels
2933	Sauropoda	Fibula	scores	Distal 1/3 is missing, numerous criss crossing scores along shaft
			insect pits / furrows	insect pitting clustered on distal margin
4179	Sauropoda	Limb Fragment	scores	several scores on distal edge
9559	Sauropoda	Pubis	insect pits / furrows	MASSIVE amounts of insect pitting, covering nearly 40% of the Bone surface
5469	Sauropoda	Rib	insect pits / furrows	lots of surface exfoliations, but some pitting insect pits / furrows distinguishable on distal margin
9611	Sauropoda	Pelvic Bone	insect pits / furrows	lots of surface wear with possible insect pitting, but unclear
5487	Sauropoda	Rib	striations	clusters of serrations on both sides towards the middle of the Fragment
9612	Sauropoda	Rib	scores	possible scores, but unlcear - Bone on center of shelf
			insect pits / furrows	abundant insect pitting
2202	Sauropoda	Rib	unknown	possible scores clustered together but unclear if prep damage
9563	Sauropoda	Rib	scores	short serial scores
			striations	NICE cluster of striations on lateral face, about halfway down the shaft, second cluster of serrations about 10 cm from distal tip
			insect pits / furrows	minor insect pitting
9610	Sauropoda	Fragment	insect pits / furrows	lots of insect pitting, especially near the narrow end
9609	Sauropoda	Rib	insect pits / furrows	lots of insect pitting along the main Spine
5925	Sauropoda	Rib	insect pits / furrows	LOTS of insect pitting on both sides of the Rib head and shaft. At the distal margin the shaft is split into two Fragments
5488	Sauropoda	Rib	scores	numerous scores and sets of striations on both sides
			striations
5486	Sauropoda	Rib	insect pits / furrows	insect pitting throughout the specimen
			scores	numerous shallow scores and striations along the shaft
			striations
8672	Apatosaurus	Fibula	insect pits / furrows	insect pitting is clustered at the muscular crest and along the proximal anterior face
9049	Sauropoda	Fragments	scores	box of five Fragments
9041	Sauropoda	Cervical Vertebra	insect pits / furrows
9047	Sauropoda	Rib	scores	several scores and striations
			striations
9048	Sauropoda	Fragment	scores	several scores and striations
			striations
9052	Sauropoda	Fragment	scores	large flat Bone Fragment with shallow scores
9053	Sauropoda	Rib	scores	scores on both surfaces, many are shallow
9054	Sauropoda	Rib	scores	numerous small scores (shallow)
9051	Sauropoda	Fragment	scores	shallow scores, unclear. Bone was found low in the quarry on top of the green clay layer (quarry floor)
9058	Sauropoda	Limb Fragment	scores	sauropod Limb in Fragments, several scores on larger pieces
			other	odd texturing on some pieces
9056	Sauropoda	Rib	striations	possible serrations but hard to determine, small
9057	Sauropoda	Rib	insect pits / furrows	on larger piece, multiple punctures and insect pitting, also odd texturing (?Combination of insect pitting and abiotic factors?)
			punctures
			other
9060	Sauropoda	Sternal Plate	score	deep score on external surface
			insect bioglyphs	mulitple rows of linear insect pits
9069	Sauropoda	Fragment	insect pits / furrows	pitting is questionable as the surface Bone is badly weathered on both pieces
9067	Sauropoda	Fragment	scores	two scores on flat side
9071	Sauropoda	Cervical Rib	score	shallow score
			other	odd texture - raised periosteum - pathologic Bone
9072	Sauropoda	Fragment	score	flat Bone Fragment with long score across near center of the largest piece
9074	Sauropoda	Vertebra	scores	cluster of multiple scores on the convex face
9077	Sauropoda	Rib	insect pits / furrows	minor insect pitting on Rib Spine
9078	Sauropoda	Vertebral Fragment	scores	numerous scores on multiple Bone surfaces
9079	Sauropoda	Fragment	score	single score on flat Bone face
9080	Sauropoda	Vertebra	scores	numberous pieces. scores are present on several Fragments
9082	Sauropoda	Cervical Vertebra	insect pits / furrows	insect pitting inside the pleurocoel, but not densely concentrated
9003	Sauropoda	Rib	scores	scores on flat Rib Fragment
9004	Sauropoda	Vertebra	insect pits / furrows	pitted insect pits / furrows on Vertebral Fragments and larger piece
			prep damage	scrape marks from backhoe (prep damage)
9010	Sauropoda	Rib	scores	several nice scores on the convex surface
9007	Sauropoda	Rib	scores	faint scores are visible near the center of the Fragment
9009	Sauropoda	Vertebra	scores	shallow scores on larger and flatter Fragment
9014	Sauropoda	Vertebra	furrows	several deep furrows on the second largest piece, surface Bone is gone, but furrows are CLEARLY visible
9018	Sauropoda	Vertebra	scores	on big vert Fragment there are two parallel scores that originate in punctures
			punctures
9019	Sauropoda	Neural Spine	insect pits / furrows	insect pitting is clustered inside a pleuroceol on anterior right side
9020	Sauropoda	Neural Spine	puncture	ovoid puncture on one piece
			scores	large cylindrical piece has several scores, another large Spine Fragment has prominent scores
9073	Sauropoda	Rib	score	large score on concave surface
9023	Sauropoda	Vertebra	fracturing	some crushing and possible marks, but hard to tell
9027	Sauropoda	Vertebra	furrow	largest piece has one long furrow
			striations	set of serrations that are very very faint and do not photograph well
9031	Sauropoda	Vertebra	insect pits / furrows	area of pitted insect pits / furrows
9032	Sauropoda	Rib	insect pits / furrows	massive and deep pitted insect pits / furrows - ?chelicerae marks in the pits? Photo taken
9033	Sauropoda	Haemal Arch	insect pits / furrows	partial Haemal Arch with shallow insect pitting along shaft
9088	Sauropoda	Rib	insect bioglyphs	distal Rib Fragmentin gwith several linear insect pits / furrows patterns
9089	Sauropoda	Fragment	furrows	sub-spherical Fragment with three shallow furrows
9099	Sauropoda	Vertebra	insect pits / furrows	patches of pitted insect pits / furrows on concave surfaces
9104	Sauropoda	Rib	scores	largest Fragment has several long scores that criss cross the Bone
9115	Sauropoda	Fragment	striated furrow	striated furrow in a long arc on the largest piece
305	Apatasaurus	Fragment	scores	2nd largest piece has scores, largest has possible scores but surface quality is poor
8769	Sauropoda	Vertebra	root marks	one smaller Fragment has modern root marks
8769?	Sauropoda	Fragment	scores	3rd largest has possible scores, surface quality is poor
8329	Apatasaurus	Cervical Rib	score	possible scores
8500	Sauropoda	Vertebral Fragment	pits	possible pits and scores but surface quality is very poor
8063	Sauropoda	Rib	insect pits / furrows	largest and 1 smaller have possible insect traces
			scores	another smaller piece has possible scores, surface quality is very poor
8501	Sauropoda	Vertebra	puncture	8 pieces unprepped, no visible marks; largest of prepped Fragment has a puncture
8592	Sauropoda	Fragment	scores	scores on largest Fragment
			pits
8586	Sauropoda	Fragment	score	possible score but surface quality is poor
8587	Sauropoda	Intersternal plate	insect pits / furrows	insect pits / furrows
8591	Sauropoda	Vertebra	unknown	surface quality too poor to ID midifications
8585	Camarasaurus	Fragment	scores	2 Fragments with possible scores and pits
			pits
8718	Sauropoda	Neural Arch	scores	largest has scores
8775	Sauropoda	Rib	pits	pits, scores, striations on both Fragments
			scores
			striations
8696	Sauropoda	Rib	score	3rd largest has score
8785	Sauropoda	Rib	scores	middle and largest have scores and insect pits / furrows
			insect pits / furrows
			root marks	mallest Fragment has modern root marks
9098	Sauropoda	Rib	striations	many serrations
9124	Camarasaurus	Vertebra	scores	numerous scores on larger pieces, smaller Fragments do not preserve cortical tissue
9126	Sauropoda	Fragment	scores	multiple scores
9125	Sauropoda	Rib	furrows	two large, matrix-filled furrows on both surfaces
9128	Sauropoda	Vertebra	scores	multiple scores on larger flat pieces
9132	Sauropoda	Fragment	scores	a pair of scores on one golf-ball sized Fragment
9143	Sauropoda	Rib	scores	Rib Fragment with multiple, weak scores
9150	Sauropoda	Vertebra	insect pits / furrows	scattered insect pitting on one surface. The individual pits are very far apart
9166	Sauropoda	Fragment	scores	large, concave Bone Fragment with several scores and one curved score
9168	Sauropoda	Fragment	scores	large Bone Fragment (?Limb) with multiple shallow scores
9172	Sauropoda	Rib	score	Rib Fragment with long score
9173	Sauropoda	Rib	abrasion	Rib in two pieces, the shorter Fragment has LOTS of sub-parallel scores, nearly covering the deep surface - possible abrasion
9178	Sauropoda	Vertebral process	insect pits / furrows	Vertebral process with minor insect pitting
9185	Sauropoda	Vertebra	scores	crushed Vertebral Fragment with possible scores
9186	Sauropoda	Rib	scores	large Rib Fragment with multiple scores
9187	Sauropoda	Fragment	scores	large flat Bone Fragment that is badly weathered, but mulitple scores are visible
9198	Sauropoda	Vertebra	scores	numerous Vertebral Fragments. Some small Fragments have scores
9200	Sauropoda	Rib	striation	Rib Fragment with possible serration
9212	Sauropoda	Rib	scores	nice long striations and scores
			striations
9213	Sauropoda	Girdle Fragment	insect pits / furrows	possible girdle Fragment wtiuh some insect pitting and possible scores, but flaking is obscurring scores
			scores
9220	Sauropoda	Limb Fragment	furrow	large, Bone Fragment with furrow (?Limb)
9221	Sauropoda	Vertebra	puncture	Vertebral Fragment with possible punctures - cortical Bone is weathered, making this unclear
9225	Sauropoda	Vertebra	scores	Vertebral Fragments in two boxes. scores on multiple pieces including the largest piece
9228	Sauropoda	Fragments	ovoid bore hole	Bone Fragment with large, ovoid bore hole (chamebr?) that is partially filled with matrix
9245	Sauropoda	Vertebra	puncture	many Vertebral Fragments with a possible puncture on the largest
9251	Sauropoda	Vertebra	scores	Vertebral Fragments, small flat piece has scores
9252	Sauropoda	Fragments	scores	three Bone Fragments with scores on the smallest piece
9273	Sauropoda	Fragments	depression	large Bone Fragment with sub-triangular depression - ?puncture. Cortical surface is weathered and hard to tell
9275	Sauropoda	Fragments	furrows	Bone Fragment with furrow
9279	Sauropoda	Vertebra	scores	numerous Vertebral Fragments, poorly preserved and bad glue, possible scores and furrows on largest piece
			furrows
9280	Sauropoda	Fragments	scores	Rib and Vertebral Fragments with scores and possible insect pits
			insect pits / furrows
9281	Sauropoda	Vertebra	scores	single Vertebral Fragment (?process) with shallow scores
9285	Sauropoda	Fragments	scores	flat Bone Fragment (?Rib) with several scores
9287	Sauropoda	Vertebral process	insect pits / furrows	Vertebral process Fragment with insect pitting damage inside a pneumatic cavity
9288	Sauropoda	Vertebral Fragment	score	flat vertberal Fragment with score
9290	Sauropoda	Fragments	puncture	large Bone Fragment with possible puncture
9291	Sauropoda	Rib	scores	Rib Fragment with shallow scores and some prep damage
			prep damage
9292	Sauropoda	Rib	scores	Rib Fragment with many scores and deep furrows
			furrows
9296	Sauropoda	Vertebra	scores	Vertebral Fragments with scores present on one Rib Fragment
9297	Sauropoda	Transverse Process	striated furrows	transverse process with Fragments, with two striated furrows on the transverse process
9309	Sauropoda	Pectoral Girdle Element	insect pits / furrows	pectoral girdle element with prep/scRibe damage and insect pits/mines
			prep damage
9310	Sauropoda	Vertebra	scores	Vertebral Fragments with scores on several larger pieces
9311	Sauropoda	Vertebra	score	Vertebral Fragments with a score on the larger piece
9314	Sauropoda	Limb Fragment	scores	Limb Fragment with many criss crossing shallow scores
9329	Sauropoda	Vertebral Process	score	Vertebral process with prominent score
9332	Sauropoda	Scapula	score	distal Scapular Fragment with a score and insect pitting damage
			insect pits / furrows
4011	Apatosaurus	Ischium	striated furrows
861	Apatosaurus	Pubis	punctures
			furrows
8968	Sauropoda	Condyle Fragment	seven small bore holes	seven very small subcircular bore holes, two are much larger than the others. The smallest are best viewed under a microscope
			three small bore holes	small, subcircular bore holes with matrix in close association
8975	Sauropoda	Vertebral Process	large ovoid bore hole	possible pupation chamber, large and deep ovoid penetration. Bottom of bore hole preserves matrix.
9339	Sauropoda	Proximal Rib Fragment	scores	proximal Rib Fragment with many shallow scores
9453	Sauropoda	Rib Fragments	scores	Sauropod Rib Fragment in eight pieces, Second largest pices has a few scores
			striated score	one striated score is present next to an area of flaked surface Bone, indicating that a tooth pierced through dried out Bone and scored the layer beneath.
8264	Sauropoda	Neural Spine	depressed fracture	partial Neural Spine of a sauropod (?Camarasaurus) in seven pieces Largest piece has a llinear depressed fracture that likely originated post-mortem and fossilized in place.
9490	Apatosaurus	Coracoid	scores	numerous long and criss crossing scores along the superifcial surface of the Coracoid, lateral to the glenoid fossa
9520	Sauropoda	Vertebral Spine Fragment	score	two long, intersecting scores
			score
9521	Sauropoda	Rib	shallow scores	many shallow scores
9522	Sauropoda	Vertebral Fragment	scores	scores present
9524	Sauropoda	Vertebral Laminae	depressions	two paired sets of depressions, matched on opposite surfaces. One depression is more accurately a depressed fracture. Upper and lower dentition meeting on this Fragment?
9543	Sauropoda	Bone Fragment	scores	six shallow, criss crossing scores and one deep and wide score
9566	Sauropoda	Vertebral Fragments	furrows	On long Fragment with spongiosa showing, two parallel furrows are present.
			scores	larger pieces have possible scores, but hard to tell
9565	Sauropoda	Cervical Vertebra	depression	small depression
			score	deep score
8584	Apatosaurus	Femur	furrows and punctures	three punctures and three furrows on posterior face of the femoral head
			punctures	cluster of deep punctures surround the adductor crest
9573	Sauropoda	Rib Fragment	scores	numerous, long and shallow scores with some striated scores
			striated scores
9575	Sauropoda	Vertebral Fragments	root marks	several, long and branching furrows from root etching on Y-shaped Fragment
9606	Sauropoda	Vertebra	puncture	deep, ovoid pouncture on Centrum Fragment
1908	Mymoorapelta maysi	Carpal Phalanx	scores	scores
4027	Mymoorapelta maysi	Ischium	scores	scores
6745	Mymoorapelta maysi	Humerus	scores	scores
1802	Mymoorapelta maysi	Dorsal Vertebra	insect pits / furrows	insect traces
6734	Mymoorapelta maysi	Dorsal Vertebra	insect pits / furrows	insect traces
1933	Mymoorapelta maysi	Atlas Centrum	score	score
3613	Mymoorapelta maysi	Dorsal-Sacral Centurm	score	2 scores
			score
1803	Mymoorapelta maysi	Dorsal Vertebra	pits	pit
6735	Mymoorapelta maysi	Dorsal Vertebra	pits	4 pits
			score
6932	Mymoorapelta maysi	Sacral Vertebral Centrum	score	possible scores, surface is bad
3620	Mymoorapelta maysi	Ribs	scores	scores
5720	Mymoorapelta maysi	Ribs	scores
			insect pits / furrows
5013	Mymoorapelta maysi	Ribs	pits
			scores
6930	Mymoorapelta maysi	Ribs	scores	scores
1905	Mymoorapelta maysi	Ribs	pits	pits
3747	Mymoorapelta maysi	Ribs	scores	scores
3763	Mymoorapelta maysi	Ribs	scores
			striations
5061	Mymoorapelta maysi	Ribs	pits
			scores
3652	Mymoorapelta maysi	Ribs	scores	scores
1812	Mymoorapelta maysi	Rib Fragments	pit	largest Fragment-pit
			insect pits / furrows	2nd smallest- insect pits / furrows
4329	Mymoorapelta maysi	Ribs	scores	scores
1811	Mymoorapelta maysi	Ribs	pit	pit
7985	Mymoorapelta maysi	Ribs	scores	scores
1912	Mymoorapelta maysi	Haemal Arch	pits	7 pits
1913	Mymoorapelta maysi	Cervical Vertebra	pits	3 pits
3651	Mymoorapelta maysi	Caudal Vertebra	score	score
1804	Mymoorapelta maysi	Caudal-Sacral Vertebra	puncture	1 puncture (2 others where surface Bone is comprimised?)
5070	Mymoorapelta maysi	Caudal Vertebra	insect pits / furrows
			score
4241	Reptilia	Vertebral Centrum	pits	possible pits
5477	Reptilia	Rib	pits	pit
8134	Dinosauria	Rib Fragment	scores	2 scores
6664	Dinosauria	Vertebral Fragment	insect pits / furrows	insect pits / furrows
6643	Dinosauria	Rib	scores	surface quality is poor, a few scores
6642	Dinosauria	Bone Fragment	scores	scores, striations
			striations
6619	Dinosauria	Rib Fragments	scores	scores on both pieces
4272	Dinosauria	Rib Fragments	scores	scores on larger of pieces
4338	Dinosauria	Limb Fragment	scores	modern insect pits / furrows, scores
			insect pits / furrows
295	Dinosauria	Bone Fragments	scores	possible scores, surface is very poor
5343	Dinosauria	Bone Fragment	insect pits / furrows	insect pits / furrows
6621	Dinosauria	Bone Fragments	score	score on largest Fragment
5352	Dinosauria	Rib	insect pits / furrows	insect pits / furrows
6626	Dinosauria	Rib	pits	pits, scores
			scores
6611	Dinosauria	Rib	score	scores, odd "chattering" surface traces, may be insect, may be modern tool marks, dremel?
6648	Dinosauria	Rib Fragments	scores	surface quality is poor, possible scores
			puncture	puncture on largest Fragment
6631	Dinosauria	Rib Fragments	scores	largest Fragment has scores
6613	Dinosauria	Pubis Fragments	root marks	middle Fragment has modern root marks
7393	Dinosauria	Rib	insect pits / furrows	insect pits / furrows
4240	Dinosauria	Bone Fragment	scores	scores
6827	Dinosauria	Vertebra	insect pits / furrows	insect pits / furrows
6826	Dinosauria	Vertebra	scores	scores
6806	Dinosauria	Rib	prep damage	chattering, dremel?, possible score, surface quality is poor
6662	Dinosauria	Rib	insect pits / furrows	insect pits / furrows?
5113	Dinosauria	Bone Fragment	deep furrows	surface quality is poor, deep furrows
6632	Dinosauria	Rib	scores	scores insect pits / furrows
			insect pits / furrows
5108	Dinosauria	Bone Fragment	scores	surface quality is poor, possible scores
6695	Dinosauria	Rib Fragment	insect pits / furrows	insect traces, puncture
			puncture
6678	Dinosauria	Rib Fragments	scores	scores on smaller piece
6673	Dinosauria	Rib Fragments	pits	pits?
307	Dinosauria	Bone Fragments	score	1 has scores
5915	Dinosauria	Haemal Arch	insect pits / furrows	possible insect traces but surface quality is poor
6612	Dinosauria	Rib	score	1 score, insect pits / furrows
			insect pits / furrows
6951	Dinosauria	Rib	insect pits / furrows	insect pits / furrows
5664	Dinosauria	Rib	insect pits / furrows	insect pits / furrows
6607	Dinosauria	Rib Fragments	insect pits / furrows	insect pits / furrows on larger Fragment
946	Dinosauria	Skull Fragment	scores	scores?
6630	Dinosauria	Rib	scores	scores
6638	Dinosauria	Rib	scores	surface quality is poor, scores?, insect pits / furrows?
			insect pits / furrows
5557	Dinosauria	Rib Fragment	scores	scores
5559	Dinosauria	Rib	scores	surface quality is poor, scores?, insect pits / furrows?
			insect pits / furrows
5532	Saurischia	Rib Fragments	score	score on largest Fragment
5528	Saurischia	Rib Fragment	insect pits / furrows	insect pits / furrows
5527	Saurischia	Bone Fragment	scores	scores
6714	Dinosauria	Rib	serial furrows	deep serial furrows
7302	Dinosauria	Haemal Arch	furrow	1 furrow, 1 pit
[truncated: 151 more rows]
