# Supplementary material for: High frequencies of theropod bite marks provide evidence for feeding, scavenging, and possible cannibalism in a stressed Late Jurassic ecosystem
Source: PLoS One. 2020 May 27;15(5):e0233115. doi: 10.1371/journal.pone.0233115 (PMC7252595; doi:10.1371/journal.pone.0233115)
Supplement: S3 Table — (XLSX) [file pone.0233115.s003.xlsx]

## Sheet: PPSresults
MWC Specimen #	Identifcation	Site Name	Elements	MWC Accession #	Collected By	Date Collected	Descrpiton
12	Unknown	Mygatt-Moore Quarry					RIB, FRAGMENTS
14	Unknown	Mygatt-Moore Quarry					BONE?, FRAGMENTS
15	Unknown	Mygatt-Moore Quarry					BONE, RIB?, FRAGMENTED
16	Unknown	Mygatt-Moore Quarry					BONE, FRAGMENTS, 1 BAG
20	Unknown	Mygatt-Moore Quarry					BONE, FRAGMENT
21	Unknown	Mygatt-Moore Quarry					BONE, CUT TO SHOW AGATIZED INTERIOR
22	Unknown	Mygatt-Moore Quarry					VERTEBRA, CAUDAL
87	Unknown	Mygatt-Moore Quarry			Museums of Western Colorado		CENTRUM, CAUDAL
126	Unknown	Mygatt-Moore Quarry			Museums of Western Colorado		SHELL, FRAGMENT WITH ATTACHED RIB?
126	Unknown	Mygatt-Moore Quarry			Museums of Western Colorado		BONE, FRAGMENT
126.1	Sauropoda	Mygatt-Moore Quarry			Museums of Western Colorado		VERTEBRA, DORSAL No field notes
127	Unknown	Mygatt-Moore Quarry			Museums of Western Colorado		TOOTH
127	Unknown	Mygatt-Moore Quarry			Museums of Western Colorado		BONE, FRAGMENTS
127	Unknown	Mygatt-Moore Quarry			Museums of Western Colorado		VERTEBRA, CAUDAL BONE FRAGMENTS
127	Unknown	Mygatt-Moore Quarry			Museums of Western Colorado		BONE,FRAGMENTS,POSTERIOR?(ASS. W. 126.1)
127	Unknown	Mygatt-Moore Quarry			Museums of Western Colorado		BONES,+ 2 CERV FRAGS IN ASSOC WITH 127.0
127	Unknown	Mygatt-Moore Quarry			Museums of Western Colorado		BONE, FRAGMENT
127	Unknown	Mygatt-Moore Quarry			Museums of Western Colorado		BONE, FRAGMENTS
127	Unknown	Mygatt-Moore Quarry			Museums of Western Colorado		BONE, FRAGMENTS
127	Unknown	Mygatt-Moore Quarry			Museums of Western Colorado		BONE, FRAGMENTS
127	Unknown	Mygatt-Moore Quarry			Museums of Western Colorado		BONE, PROCESS, TOOTH-LIKE
127	Unknown	Mygatt-Moore Quarry					VERTEBRA, IN PLASTER JACKET
127	Unknown	Mygatt-Moore Quarry					VERTEBRA, CERVICAL (FROM 127.0)
127	Unknown	Mygatt-Moore Quarry					BONE, FRAGMENTS, LOOSE, FOUND WITH 127.1
127	Unknown	Mygatt-Moore Quarry					BONE, FRAGMENTS, LOOSE, FOUND WITH 127.1
127	Unknown	Mygatt-Moore Quarry			Museums of Western Colorado		BONE, FRAGMENTS
191	Unknown	Mygatt-Moore Quarry				1994-09-13	Phalange
255	Apatosaurus sp.	Mygatt-Moore Quarry			Museums of Western Colorado		VERTEBRA, 3RD CERVICAL
256	Apatosaurus sp.	Mygatt-Moore Quarry	chevron		Museums of Western Colorado		Chevron (Old# has been scratched away)
257	Apatosaurus sp.	Mygatt-Moore Quarry	chevron		Museums of Western Colorado		CHEVRON
258	Apatosaurus sp.	Mygatt-Moore Quarry	chevron		---		CHEVRON
259	Apatosaurus sp.	Mygatt-Moore Quarry	Metacarpal		Museums of Western Colorado		Metacarpal
260	Unknown	Mygatt-Moore Quarry			Museums of Western Colorado		VERTEBRA, CERVICAL
260	Unknown	Mygatt-Moore Quarry			Museums of Western Colorado		VERTEBRA, TIP OF CERVICAL
261	Apatosaurus sp.	Mygatt-Moore Quarry			Museums of Western Colorado		TRANSVERSE PROCESS
262	Apatosaurus sp.	Mygatt-Moore Quarry	chevron		Museums of Western Colorado		CHEVRON, WITH SOME MUD STONE
263	Unknown	Mygatt-Moore Quarry			Museums of Western Colorado		BONE, FRAGMENT
264	Unknown	Mygatt-Moore Quarry			Museums of Western Colorado		VERTEBRA, BONE FRAGMENT
265	Apatosaurus sp.	Mygatt-Moore Quarry			Museums of Western Colorado		RIB, FRAGMENT
266	Apatosaurus sp.	Mygatt-Moore Quarry	limb bone			1993-09-14	BONE, END OF LIMB Field ID: unknown Poor condition Easting: 986 Northing: 997 Field notes: This block may contain field #6
268	Unknown	Mygatt-Moore Quarry			Museums of Western Colorado		RIB, FRAGMENT
269	Apatosaurus sp.	Mygatt-Moore Quarry			Museums of Western Colorado		Rib No field notes
270	Apatosaurus sp.	Mygatt-Moore Quarry	rib fragment		Museums of Western Colorado		Rib, fragment, flat No field notes
271	Unknown	Mygatt-Moore Quarry					BONE, FLAT
272	Apatosaurus sp.	Mygatt-Moore Quarry	bone fragments				Bone, near coracoid No field notes
274	Unknown	Mygatt-Moore Quarry					VERTEBRAE, SMALL
276	Unknown	Mygatt-Moore Quarry					?
277	Unknown	Mygatt-Moore Quarry					VERTEBRAE
278	Unknown	Mygatt-Moore Quarry					VERTEBRAE
284	Unknown	Mygatt-Moore Quarry			Museums of Western Colorado		VERTEBRA, CAUDAL
285	Unknown	Mygatt-Moore Quarry			Museums of Western Colorado	1982	RIB, FRAGMENT
286	Unknown	Mygatt-Moore Quarry			Museums of Western Colorado	1982	RIB, FRAGMENT
287	Unknown	Mygatt-Moore Quarry			Museums of Western Colorado	1982	RIB, FRAGMENT
288	Unknown	Mygatt-Moore Quarry			Museums of Western Colorado	1982	RIB, FRAGMENT
289	Unknown	Mygatt-Moore Quarry			Museums of Western Colorado	1982	RIB, FRAGMENT
290	Unknown	Mygatt-Moore Quarry			Museums of Western Colorado	1982	RIB, FRAGMENT
291	Unknown	Mygatt-Moore Quarry			Museums of Western Colorado	1982	RIB, FRAGMENT
292	Unknown	Mygatt-Moore Quarry			Museums of Western Colorado	1982	RIB, FRAGMENT
293	Unknown	Mygatt-Moore Quarry			Museums of Western Colorado	1982	RIB, FRAGMENT
295	Apatosaurus sp.	Mygatt-Moore Quarry	bone fragments		Museums of Western Colorado	1987-09-27	BONE, FRAGMENTS No field notes
296	Apatosaurus sp.	Mygatt-Moore Quarry			Museums of Western Colorado		RIB No field notes
297	Apatosaurus sp.	Mygatt-Moore Quarry	bone fragments		Museums of Western Colorado	1987-09-24	BONE, FRAGMENTS No field notes
298	Apatosaurus sp.	Mygatt-Moore Quarry	Bone fragments, Zygapophysis	FIC2010	Museums of Western Colorado	1987-09-23	Bone fragments, Zygapophysis No field notes
300	Unknown	Mygatt-Moore Quarry			Museums of Western Colorado		VERTEBRA, FRAGMENT
301	Unknown	Mygatt-Moore Quarry			Museums of Western Colorado		VERTEBRA, FRAGMENT
302	Unknown	Mygatt-Moore Quarry			Museums of Western Colorado		VERTEBRA, FRAGMENT
303	Apatosaurus sp.	Mygatt-Moore Quarry	bone fragments		Museums of Western Colorado	1987-09-26	BONE, FRAGMENTS No field notes
304	Apatosaurus sp.	Mygatt-Moore Quarry			Museums of Western Colorado	1987-09-27	BONE, FRAGMENTS No field notes
305	Apatosaurus sp.	Mygatt-Moore Quarry	Bone fragments		Museums of Western Colorado	1987-09-23	BONE, FRAGMENTS No field notes
306	Allosaurus sp.	Mygatt-Moore Quarry	phlanx or tarsal		Museums of Western Colorado		phalanx (TARSAL?)
307	Apatosaurus sp.	Mygatt-Moore Quarry	bone fragments		Museums of Western Colorado	1987-09-27	BONE, FRAGMENTS No field notes
308	Apatosaurus sp.	Mygatt-Moore Quarry	bone fragments		Museums of Western Colorado		BONE, FRAGMENTS No field notes
310	Unknown	Mygatt-Moore Quarry					VERTEBRA, FRAGMENT
311	Unknown	Mygatt-Moore Quarry					VERTEBRA, FRAGMENT
312	Unknown	Mygatt-Moore Quarry					BONE, FRAGMENTS
313	Apatosaurus sp.	Mygatt-Moore Quarry	ischium		Museums of Western Colorado	1982	ISCHIUM (FITS TO CAT.#314) No field notes
314	Apatosaurus sp.	Mygatt-Moore Quarry	ischium		Museums of Western Colorado	1982	ISCHIUM (FITS TO CAT# 313) No field notes
315	Apatosaurus sp.	Mygatt-Moore Quarry	Rib fragment	FIC2009	Museums of Western Colorado		RIB, FRAGMENT No field notes
316	Apatosaurus sp.	Mygatt-Moore Quarry	Rib, fragment		Museums of Western Colorado		Rib, fragment No field notes
317	Apatosaurus sp.	Mygatt-Moore Quarry	cervical rib	FIC2009	Museums of Western Colorado		RIB, CERVICAL No field notes
318	Apatosaurus sp.	Mygatt-Moore Quarry	cervical rib fragment		Museums of Western Colorado	1982	RIB, FRAGMENT, CERVICAL No field notes
321	Unknown	Mygatt-Moore Quarry			Museums of Western Colorado		RIB, FRAGMENT
322	Unknown	Mygatt-Moore Quarry			Museums of Western Colorado		RIB, FRAGMENT
323	Unknown	Mygatt-Moore Quarry			Museums of Western Colorado		RIB, FRAGMENT
324	Apatosaurus sp.	Mygatt-Moore Quarry	Rib frag		Museums of Western Colorado		RIB, FRAGMENT No field notes
325	Unknown	Mygatt-Moore Quarry			Museums of Western Colorado		RIB, FRAGMENT
326	Unknown	Mygatt-Moore Quarry			Museums of Western Colorado		RIB, FRAGMENT
327	Unknown	Mygatt-Moore Quarry			Museums of Western Colorado		RIB, FRAGMENT
328	Unknown	Mygatt-Moore Quarry			Museums of Western Colorado		RIB, FRAGMENT
329	Unknown	Mygatt-Moore Quarry			Museums of Western Colorado		RIB, FRAGMENT
331	Unknown	Mygatt-Moore Quarry			Museums of Western Colorado		BONE, FRAGMENT
332	Unknown	Mygatt-Moore Quarry			Museums of Western Colorado		BONE, FRAGMENT
333	Unknown	Mygatt-Moore Quarry			Museums of Western Colorado		BONE, FRAGMENT
334	Unknown	Mygatt-Moore Quarry			Museums of Western Colorado		CHEVRON, FRAGMENT
336	Unknown	Mygatt-Moore Quarry			Museums of Western Colorado	1982	CHEVRON
337	Unknown	Mygatt-Moore Quarry			Museums of Western Colorado		BONE, FRAGMENTS
338	Apatosaurus sp.	Mygatt-Moore Quarry	bone frags		Museums of Western Colorado		BONE, FRAGMENTS No field notes
340	Apatosaurus sp.	Mygatt-Moore Quarry	vertebral process	FIC2011	Museums of Western Colorado	1988-09-21	Vertebral process No field notes from below FS-MSQ-22 loc. 1.05.86
341	Unknown	Mygatt-Moore Quarry			Museums of Western Colorado		BONE, FRAGMENTS
342	Unknown	Mygatt-Moore Quarry			Museums of Western Colorado		BONE, FRAGMENTS
343	Unknown	Mygatt-Moore Quarry			Museums of Western Colorado		BONE, FRAGMENTS
344	Unknown	Mygatt-Moore Quarry			Museums of Western Colorado		RIB, FRAGMENT
347	Unknown	Mygatt-Moore Quarry			Museums of Western Colorado		BONE, FRAGMENTS
348	Unknown	Mygatt-Moore Quarry			Museums of Western Colorado		BONE, FRAGMENTS
351	Unknown	Mygatt-Moore Quarry			Museums of Western Colorado		BONE, FRAGMENTS (ASSOC. WITH CAT# 127)
352	Unknown	Mygatt-Moore Quarry			Museums of Western Colorado		BONE, FRAGMENTS
360	Unknown	Mygatt-Moore Quarry			Museums of Western Colorado		BONE, FRAGMENTS
361	Unknown	Mygatt-Moore Quarry			Museums of Western Colorado		BONE, FRAGMENTS
362	Unknown	Mygatt-Moore Quarry			Museums of Western Colorado		BONE, FRAGMENTS
367	Unknown	Mygatt-Moore Quarry			Museums of Western Colorado		BONE, FRAGMENTS
373	Unknown	Mygatt-Moore Quarry					BONE, FRAGMENTS
380	Unknown	Mygatt-Moore Quarry			Museums of Western Colorado		RIB, FRAGMENT
381	Unknown	Mygatt-Moore Quarry			Museums of Western Colorado		RIB, VERTEBRA AND FRAGMENTS
385	Apatosaurus sp.	Mygatt-Moore Quarry	chevron	FIC2009	Museums of Western Colorado		Chevron, missing distal half No field notes
390	Unknown	Mygatt-Moore Quarry			Museums of Western Colorado		VERTEBRAL, FRAGMENTS
391	Unknown	Mygatt-Moore Quarry			Museums of Western Colorado		BONE, FRAGMENTS
398	Unknown	Mygatt-Moore Quarry			Museums of Western Colorado		VERTEBRA, CERVICAL POSTERIOR
403	Unknown	Mygatt-Moore Quarry			Museums of Western Colorado		VERTEBRA, DORSAL FRAGMENTS
407	Unknown	Mygatt-Moore Quarry					BONE, FRAGS, ASOC. WITH 13TH CERVICAL?*
408	Unknown	Mygatt-Moore Quarry			Museums of Western Colorado		BONE, FRAGMENTS ASSOCIATED WITH #2 VERT.
410	Unknown	Mygatt-Moore Quarry					BONE, FRAGMENTS
411	Apatosaurus sp.	Mygatt-Moore Quarry	Cervical vert		Museums of Western Colorado	1982	VERTEBRA, CERVICAL AND BAG OF FRAGMENTS No field notes
411	Unknown	Mygatt-Moore Quarry					VERTEBRAL FRAG, MAY FIT 411
411	Unknown	Mygatt-Moore Quarry					VERTEBRA, FRAGMENT
411	Unknown	Mygatt-Moore Quarry					VERTEBRA, FRAGMENT
411	Unknown	Mygatt-Moore Quarry					VERTEBRA, FRAGMENT
411	Unknown	Mygatt-Moore Quarry					VERTEBRA, FRAGMENT
411	Unknown	Mygatt-Moore Quarry					VERTEBRA, FRAGMENT
411	Unknown	Mygatt-Moore Quarry					VERTEBRA, FRAGMENT
411	Unknown	Mygatt-Moore Quarry					BONE, FRAGMENT
411	Unknown	Mygatt-Moore Quarry					VERTEBRA, FRAGMENT
414	Unknown	Mygatt-Moore Quarry			Museums of Western Colorado		VERTEBRA, FRAGMENTS, RIB HEAD*
416	Unknown	Mygatt-Moore Quarry			Museums of Western Colorado		VERTEBRAL, FRAGMENTS
423	Unknown	Mygatt-Moore Quarry			Museums of Western Colorado		VERTEBRAL, FRAGMENTS
428	Unknown	Mygatt-Moore Quarry			Museums of Western Colorado		BONE, FRAGMENTS
432	Unknown	Mygatt-Moore Quarry			Museums of Western Colorado	1982	VERTEBRAL, FRAGMENTS
434	Unknown	Mygatt-Moore Quarry			Museums of Western Colorado		VERTEBRAL, FRAGMENTS
437	Unknown	Mygatt-Moore Quarry			Museums of Western Colorado		VERTEBRA, DORSAL
440	Unknown	Mygatt-Moore Quarry			Dinamation International Society		Fish, nearly complete external mold, missing ant skull and pe
441	Unknown	Mygatt-Moore Quarry			Dinamation International Society		External mold, flank, part pelvic fin, scale pattern preserve
451	Diplodocus	Mygatt-Moore Quarry	Caudal vertebra		Dinamation International Society		VERTEBRA, CAUDAL AND FRAGMENTS No field notes
452	Apatosaurus sp.	Mygatt-Moore Quarry	rib		Museums of Western Colorado		dorsal rib
453	Unknown	Mygatt-Moore Quarry			Museums of Western Colorado		BONES, FRAGMENTS*
454	Unknown	Mygatt-Moore Quarry			Museums of Western Colorado		METATARSAL?
628	Sauropoda indet.	Mygatt-Moore Quarry	vertebra				VERTEBRA, IN BOX
677	Sauropoda	Mygatt-Moore Quarry	rib frag	FIC2010			Rib frag No field notes
677	Unknown	Mygatt-Moore Quarry					bone frag
677	Unknown	Mygatt-Moore Quarry					bone frag
677	Unknown	Mygatt-Moore Quarry					vert fraag
677	Unknown	Mygatt-Moore Quarry					scute?
677	Unknown	Mygatt-Moore Quarry					bone frag
677	Unknown	Mygatt-Moore Quarry					rib?
677	Unknown	Mygatt-Moore Quarry					rib
677	Unknown	Mygatt-Moore Quarry					bone frag
677	Unknown	Mygatt-Moore Quarry					bone frag in matrix
677	Unknown	Mygatt-Moore Quarry					bone frag in matrix
677	Unknown	Mygatt-Moore Quarry					bone frag
677	Unknown	Mygatt-Moore Quarry					bone frag
677	Unknown	Mygatt-Moore Quarry					vertebral frag
677	Unknown	Mygatt-Moore Quarry					rib
677	Unknown	Mygatt-Moore Quarry					rib
677	Unknown	Mygatt-Moore Quarry					bone frag
677	Unknown	Mygatt-Moore Quarry					chevron?
677	Unknown	Mygatt-Moore Quarry					bone frag
677	Unknown	Mygatt-Moore Quarry					bone frag
677	Unknown	Mygatt-Moore Quarry					bone frag
677	Unknown	Mygatt-Moore Quarry					bone frag
677	Unknown	Mygatt-Moore Quarry					bone frag
677	Unknown	Mygatt-Moore Quarry					bone frag
677	Unknown	Mygatt-Moore Quarry					bone frag
677	Unknown	Mygatt-Moore Quarry					rib
677	Unknown	Mygatt-Moore Quarry					vert frag
677	Unknown	Mygatt-Moore Quarry					bone frag
677	Unknown	Mygatt-Moore Quarry					bone frag
677	Unknown	Mygatt-Moore Quarry					rib
677	Unknown	Mygatt-Moore Quarry					rib
677	Unknown	Mygatt-Moore Quarry					rib
677	Unknown	Mygatt-Moore Quarry					rib?
677	Unknown	Mygatt-Moore Quarry					bone frag
677	Unknown	Mygatt-Moore Quarry					bone frag
677	Unknown	Mygatt-Moore Quarry					bone frag
677	Unknown	Mygatt-Moore Quarry					bone frag
677	Unknown	Mygatt-Moore Quarry					bone frag
677	Unknown	Mygatt-Moore Quarry					rib
677	Unknown	Mygatt-Moore Quarry					bone frag
677	Unknown	Mygatt-Moore Quarry					bone frag
677	Unknown	Mygatt-Moore Quarry					bone frag
677	Unknown	Mygatt-Moore Quarry					bone frag
677	Unknown	Mygatt-Moore Quarry					bone frag
677	Unknown	Mygatt-Moore Quarry					bone frag
677	Unknown	Mygatt-Moore Quarry					bone frag
677	Unknown	Mygatt-Moore Quarry					bone frag
677	Unknown	Mygatt-Moore Quarry					bone frag
677	Unknown	Mygatt-Moore Quarry					bone frag
677	Unknown	Mygatt-Moore Quarry					bone frag
677	Unknown	Mygatt-Moore Quarry					bone frag
677	Unknown	Mygatt-Moore Quarry					bone frag
677	Unknown	Mygatt-Moore Quarry					bone frag
677	Unknown	Mygatt-Moore Quarry					bone frag
677	Unknown	Mygatt-Moore Quarry					bone frag
677	Unknown	Mygatt-Moore Quarry					bone frag
677	Unknown	Mygatt-Moore Quarry					bone frag
677	Unknown	Mygatt-Moore Quarry					bone frag
677	Unknown	Mygatt-Moore Quarry					bone frag
677	Unknown	Mygatt-Moore Quarry					bone frag
677	Unknown	Mygatt-Moore Quarry					bone frag
677	Unknown	Mygatt-Moore Quarry					bone frag
677	Unknown	Mygatt-Moore Quarry					bone frag
677	Unknown	Mygatt-Moore Quarry					bone frag
677	Unknown	Mygatt-Moore Quarry					bone frag
677	Unknown	Mygatt-Moore Quarry					bone frag
677	Unknown	Mygatt-Moore Quarry					bone frag
677	Unknown	Mygatt-Moore Quarry					bone frag
677	Unknown	Mygatt-Moore Quarry					scute?
677	Unknown	Mygatt-Moore Quarry					bone frag
677	Unknown	Mygatt-Moore Quarry					bone frag
677	Unknown	Mygatt-Moore Quarry					bone frag
677	Unknown	Mygatt-Moore Quarry					bone frag
677	Reptilia indet.	Mygatt-Moore Quarry	Bone fragments	FIC2009		1990-08-07	BONE, fragments FROM FIELD JACKET No field notes
677.7	Sauropoda indet.	Mygatt-Moore Quarry	rib?	FIC2010	Dinamation International Society	1990-08-07	rib? pieces No field notes
678	Sauropoda	Mygatt-Moore Quarry	rib		Museums of Western Colorado		Dorsal rib with scores and insect pits/furrows
683	Saurischia	Mygatt-Moore Quarry	caudal vertebra				VERTEBRA, TAIL
815	Unknown	Mygatt-Moore Quarry					BONE, FOR TESTING
816	Unknown	Mygatt-Moore Quarry					AGATIZED
817	Apatosaurus sp.	Mygatt-Moore Quarry	dorsal vertebra			1986-01-05	VERTEBRA, DORSAL AND FRAGMENTS No field notes
820	Unknown	Mygatt-Moore Quarry					VERTEBRA, LATERAL PROCESS
821	Unknown	Mygatt-Moore Quarry					RIB, FRAGMENT
821	Unknown	Mygatt-Moore Quarry					RIB, FRAGMENT
822	Apatosaurus sp.	Mygatt-Moore Quarry	vertebra				vertebral fragments with preserved scores
822	Unknown	Mygatt-Moore Quarry					VERTEBRA
822	Unknown	Mygatt-Moore Quarry					CENTRUM
822	Unknown	Mygatt-Moore Quarry					BONE, FRAGMENTS IN BAG
822	Unknown	Mygatt-Moore Quarry					BONE, FRAGMENTS, IN BAG
822	Unknown	Mygatt-Moore Quarry					BONE, FRAGMENTS, IN BAG
822	Unknown	Mygatt-Moore Quarry					BONE, FRAGMENTS, IN BAG
822	Unknown	Mygatt-Moore Quarry					CENTRUM, BONE FRAGMENTS, IN BAG
822	Unknown	Mygatt-Moore Quarry					RIB, FRAGMENTS
822	Unknown	Mygatt-Moore Quarry					VERTEBRA, FRAGMENTS
822	Unknown	Mygatt-Moore Quarry					BONE, FRAGS (2) AND PLANT
822	Unknown	Mygatt-Moore Quarry					BONE, FRAGMENTS, UNIDENTIFIED
822	Unknown	Mygatt-Moore Quarry					BONE, FRAGMENTS, UNIDENTIFIED
822.1	Apatosaurus sp.	Mygatt-Moore Quarry	vertebra				VERTEBRA No field notes
824	Apatosaurus sp.	Mygatt-Moore Quarry	vertebra frags				BONE FRAGMENTS, FROM VERTEBRA No field notes
827	Sauropoda	Mygatt-Moore Quarry	Rib frags				RIB, FRAGMENTS large rib fragment on OS-33 with depressions and insect pits/furrows No field notes
829	Unknown	Mygatt-Moore Quarry					RIB, FRAGMENT
830	Unknown	Mygatt-Moore Quarry					BONE, FRAGMENT
831	Unknown	Mygatt-Moore Quarry					RIB, END
832	Unknown	Mygatt-Moore Quarry					RIB, FRAGMENT
833	Unknown	Mygatt-Moore Quarry					VERTEBRA, FRAGMENT
834	Unknown	Mygatt-Moore Quarry
835	Unknown	Mygatt-Moore Quarry					RIB, FRAGMENT
836	Unknown	Mygatt-Moore Quarry					BONE, FRAGMENT
837	Saurischia indet.	Mygatt-Moore Quarry	proximal phalanx			1991-10-21	proximal phalanx of digit 3 had been identified as 'Carpal'
838	Unknown	Mygatt-Moore Quarry					BONE, FRAGMENTS
839	Unknown	Mygatt-Moore Quarry					BONE, FRAGMENTS
850	Unknown	Mygatt-Moore Quarry					BONE, FRAGMENTS
855	Unknown	Mygatt-Moore Quarry					BONE, FRAGMENT
856	Unknown	Mygatt-Moore Quarry					BONE, FRAGMENT
857	Unknown	Mygatt-Moore Quarry					BONE, FRAGMENT
858	Unknown	Mygatt-Moore Quarry					SCUTE(?)
875	Sauropoda	Mygatt-Moore Quarry	caudal vertebra			1991-09-24	Vert. caudal No field notes
876	Sauropoda indet.	Mygatt-Moore Quarry	transverse process	FIC2009		1991-09-24	transverse process No field notes
891	Unknown	Mygatt-Moore Quarry					rib frag
892	Sauropoda indet.	Mygatt-Moore Quarry	bone fragment		Dinamation International Society	1991-06-06	bone fragment Field ID: scute? in matrix, NW wall Pit 1, loc.1.05.86
908	Unknown	Mygatt-Moore Quarry					bone frag
909	Unknown	Mygatt-Moore Quarry					rib frag
909	Unknown	Mygatt-Moore Quarry					trransverse process
909	Unknown	Mygatt-Moore Quarry					bone frag
917	Unknown	Mygatt-Moore Quarry					11 bone frags in bag
918	Unknown	Mygatt-Moore Quarry					bone frags in bag
919	Unknown	Mygatt-Moore Quarry					rib? and bone frags
920	Unknown	Mygatt-Moore Quarry					bone frag
921	Unknown	Mygatt-Moore Quarry					bone frags in bag
922	Unknown	Mygatt-Moore Quarry					bone and frrags
923	Unknown	Mygatt-Moore Quarry					bone frag
930	Vertebrata	Mygatt-Moore Quarry	bone frag				bone frag No field notes
939	Mymoorapelta maysi	Mygatt-Moore Quarry	claw, ungual (manual?)		Dinamation International Society	1990-07-23	claw, ungual No field notes
942	Sauropoda indet.	Mygatt-Moore Quarry	dorsal vertebra fragment	FIC2009		1990-08-14	Vertebra, dorsal fragment Field notes: small apatosaurus dorsal vert
945	Dinosauria indet.	Mygatt-Moore Quarry	bone fragments			?1985	bone fragments collected in 1985?
946	Dinosauria indet.	Mygatt-Moore Quarry	skull fragment				skull fragment?
947	Dinosauria indet.	Mygatt-Moore Quarry	zygapophysis				zygapophysis
948	Vertebrata indet.	Mygatt-Moore Quarry	rib? fragments		Dinamation International Society	1990-08-14	rib? fragments piece with # 948.2 FIC2009 Duplicate field number with MWC 942 Field notes: small apatosaurus dorsal vert frags, in bag
949	Allosaurus sp.	Mygatt-Moore Quarry	metatarsal		Dinamation International Society	1990-08-14	metatarsal No field info Field tag says Apatosaurus metatarsal or Allo. element, with initials KLS
952	Sauropoda indet.	Mygatt-Moore Quarry	metacarpal IV	FIC2010	Dinamation International Society		metacarpal 4 No field notes Found old tag: apato? metatarsal, Pit 2, Ruby Kirkland Exped., loc. 1.05.86 (collected in 1986) was exhibited in D.V. lab window 2 April 1992
953	Sauropoda indet.	Mygatt-Moore Quarry	pedal ungual				pedal ungual large claw FIC 10/19
1023	Mymoorapelta maysi	Mygatt-Moore Quarry	scute		Dinamation International Society	1990-07-31	Scute Field ID: nodosaur scute, dorsal ribs
1027	Dinosauria indet.	Mygatt-Moore Quarry	vertebra	FIC	Dinamation International Society	1990-07-24	Vertebra? Field notes: small claw Jim Kirkland's notes: "Bone near "skull" - Morrison - Interesting"
1031	Saurischia indet.	Mygatt-Moore Quarry	bone fragments				bone fragments No field notes
1092	Sauropoda	Mygatt-Moore Quarry	Vertebral process	FIC2011			vertebral process No field notes
1800	Mymoorapelta maysi	Mygatt-Moore Quarry	dorsal vertebra			1992-06-07	DORSAL VERTEBRA, DORSAL 1 Field ID: anterior caudal vertebra, nodosaur
1801	Mymoorapelta maysi	Mygatt-Moore Quarry	dorsal vertebra			1992-10-05	dorsal vertebra, middle No field notes
1802	Mymoorapelta maysi	Mygatt-Moore Quarry	dorsal vertebra		Dinamation International Society	1993-06-21	dorsal vertebra, middle No field notes
1803	Mymoorapelta maysi	Mygatt-Moore Quarry	dorsal vertebra				Dorsal Vertebra, posterior No field notes
1804	Mymoorapelta maysi	Mygatt-Moore Quarry	caudo-sacral, caudal I		Museums of Western Colorado	1982-01-01	caudo-sacral, caudal 1 No field notes
1805	Mymoorapelta maysi	Mygatt-Moore Quarry	caudal vertebra				Caudal Vertebra, Caudal 2 Field ID: 1st(?) caudal vertebra, nodosaur
1807	Mymoorapelta maysi	Mygatt-Moore Quarry	mid-caudal				mid-caudal No field notes
1808	Mymoorapelta maysi	Mygatt-Moore Quarry	mid-distal caudal		Museums of Western Colorado	1992-07-01	mid-distal caudal No field notes
1810	Mymoorapelta maysi	Mygatt-Moore Quarry	rib	FIC2009			rib, anterior No field notes
1811	Mymoorapelta maysi	Mygatt-Moore Quarry	rib	FIC2009			rib No field notes
1812	Mymoorapelta maysi	Mygatt-Moore Quarry	ribs	FIC 2009	Dinamation International Society	1993-07-06	ribs On pebble bed
1813	Mymoorapelta maysi	Mygatt-Moore Quarry	scute	FIC 2009	Museums of Western Colorado	1993-08-17	scute No field notes
1814	Mymoorapelta maysi	Mygatt-Moore Quarry	right ulna				right ulna No field notes
1816	Mymoorapelta maysi	Mygatt-Moore Quarry	phalanx	FIC2009	Dinamation International Society	1992-08-04	phalanx No field notes
1817	Mymoorapelta maysi	Mygatt-Moore Quarry	carpal phalange	FIC2009	Dinamation International Society	1992-10-04	carpal phalange No field notes
1821	Mymoorapelta maysi	Mygatt-Moore Quarry	caudal spine	FIC2009	Dinamation International Society	1992-07-14	spine, caudal, upper Field ID: spine, nodosaur
1822	Mymoorapelta maysi	Mygatt-Moore Quarry	caudal spine	FIC2009			spine, caudal, upper No field notes
1823	Mymoorapelta maysi	Mygatt-Moore Quarry	lateral spine	FIC2009	Dinamation International Society	1992-09-16	lateral spine Field ID: nodosaur spine
1824	Mymoorapelta maysi	Mygatt-Moore Quarry	lateral spine	FIC2009			lateral spine, lower No field notes
1825	Mymoorapelta maysi	Mygatt-Moore Quarry	spine	FIC2009			spine, possibly part of 1st cervical ring? No field notes
1827	Mymoorapelta maysi	Mygatt-Moore Quarry	scute	FIC2009	Dinamation International Society	1990-07-31	scute Duplicate field number with MWC 1023 Field ID: nodosaur scute
1828	Mymoorapelta maysi	Mygatt-Moore Quarry	scute	FIC2009	Dinamation International Society	1993-07-26	scute No field notes
1829	Mymoorapelta maysi	Mygatt-Moore Quarry	scute	FIC2009			scute No field notes
1830	Mymoorapelta maysi	Mygatt-Moore Quarry	scute	FIC2009		1990-09-11	scute No field notes
1835	Mymoorapelta maysi	Mygatt-Moore Quarry	scute	FIC2009			scute No field notes
1836	Mymoorapelta maysi	Mygatt-Moore Quarry	scute	FIC2009			scute No field notes
1837	Mymoorapelta maysi	Mygatt-Moore Quarry	scute	FIC2009	Museums of Western Colorado	1993-08-17	scute No field notes
1838	Mymoorapelta maysi	Mygatt-Moore Quarry	sacral shield armor				sacral shield armor No field notes
1840	Mymoorapelta maysi	Mygatt-Moore Quarry	rib	FIC2009			rib, posterior No field notes
1841	Mymoorapelta maysi	Mygatt-Moore Quarry	scute	FIC2009	Museums of Western Colorado	1993-07-27	scute, plate section No field notes
1842	Mymoorapelta maysi	Mygatt-Moore Quarry	scute	FIC2009	Museums of Western Colorado	1991-06-25	scute, plate section No field notes
1843	Mymoorapelta maysi	Mygatt-Moore Quarry	scute	FIC2009	Museums of Western Colorado	1992-07-06	scute Too many specimens with this to determine which belongs to this scute
1844	Mymoorapelta maysi	Mygatt-Moore Quarry	scute	FIC2009	Dinamation International Society	1993-07-06	scute No field notes
1845	Mymoorapelta maysi	Mygatt-Moore Quarry	scute	FIC2009	Museums of Western Colorado	1992-07-07	scute Field ID: nodosaur Easting: 998.5 Northing: 1007.6
1848	Apatosaurus sp.	Mygatt-Moore Quarry	left scapula, juvenile				left scapula, juvenile No field notes
1902	Reptilia	Mygatt-Moore Quarry	dorsal vertebra		Museums of Western Colorado	1994-08-01	Vertebra, Dorsal, anterior Field ID: croc, small vert Easting: 993.0 Northing: 1005.3 10cm up from bottom of quarry
1904	Dinosauria indet.	Mygatt-Moore Quarry	claw			1993-08-03	Claw fragment and matrix ornithopod? No field notes
1905	Mymoorapelta maysi	Mygatt-Moore Quarry	rib		Dinamation International Society	1993-08-02	cervical rib No field notes
1906	Allosaurus sp.	Mygatt-Moore Quarry	dorsal rib				Rib, dorsal No field notes
1907	Mymoorapelta maysi	Mygatt-Moore Quarry	caudal, distal to mid-, vertebra			1992-10-04	Vertebra, caudal, distal to mid- No field notes
1908	Mymoorapelta maysi	Mygatt-Moore Quarry	carpal phalange			1991-09-23	carpal phalange No field notes
1909	Mymoorapelta maysi	Mygatt-Moore Quarry	scute	D-1992.1.1	Museums of Western Colorado	1992-07-29	Scute, spike? No field notes
1911	Mymoorapelta maysi	Mygatt-Moore Quarry	scute	FIC2009	Dinamation International Society	1993-07-05	scute No field notes
1912	Mymoorapelta maysi	Mygatt-Moore Quarry	Chevron		Dinamation International Society	1994-09-06	Chevron 30 cm above pebble bed Easting: 998.7 Northing: 1009.8 Length: 12cm Width: 2cm
1913	Mymoorapelta maysi	Mygatt-Moore Quarry	Vertebra, caudal, centrum		Museums of Western Colorado	1992-09-07	Vertebra, caudal, centrum No field notes
1914	Mymoorapelta maysi	Mygatt-Moore Quarry	scute		Museums of Western Colorado	1992-08-05	Scute No field notes
1915	Mymoorapelta maysi	Mygatt-Moore Quarry	rib			1992-10-04	Rib, ?nodo No field notes
1916	Sauropoda indet.	Mygatt-Moore Quarry	Vertebra, cervical, juvenile			1992-05-18	Vertebra, cervical, mid Juvenile based on size and open neurocentral sutures. Very young individual.
1917	Sauropoda indet.	Mygatt-Moore Quarry	Vertebra, cervical		Dinamation International Society	1992-09-16	Vertebra, cervical Juvenile, very young. DIS tag: baby Apato. cervical centrum 10(cm) above P. bed N 1009.8 E 999.8
1918	Allosaurus sp.	Mygatt-Moore Quarry	metatarsal II?		Dinamation International Society	1993-09-21	Metatarsal II? No field notes On Pebble bed N 1007.5-.8 E 995.9 L 335 W 90
1919	Allosaurus sp.	Mygatt-Moore Quarry	rib, dorsal, anterior (pectoral)			1992-07-13	Rib, dorsal, anterior (pectoral) No field notes
1921	Allosaurus sp.	Mygatt-Moore Quarry	vertebra, caudal, distal		Dinamation International Society	1992-07-27	Vertebra, caudal, distal, large No field notes Old tag says "on pebble bed Pond beds" N1008.5 998.9E
1925	Allosaurus sp.	Mygatt-Moore Quarry	rib, cervical		Dinamation International Society	1992-09-16	Rib, cervical No field notes
1927	Apatosaurus excelsus	Mygatt-Moore Quarry	cervical vertebra				Vertebra, Cervical, middle No field notes
1928	Apatosaurus sp.	Mygatt-Moore Quarry	vertebra, cervical, middle				Vertebra, Cervical, middle No field notes
1929	Apatosaurus sp.	Mygatt-Moore Quarry	vertebra, cervical, middle				Vertebra, Cervical, middle No field notes
1930	Sauropoda indet.	Mygatt-Moore Quarry	rib	FIC2009			Rib No field notes Was in block of four cervicals prepared by Bonnie and Kay.
1931	Allosaurus sp.	Mygatt-Moore Quarry	metacarpal I		Dinamation International Society	1992-06-15	Metacarpal I (metacarpal of 1st digit of manus) Pond 30cm above beds 1007.4N, 998.5E
1932	Sauropoda indet.	Mygatt-Moore Quarry	phalanx		Dinamation International Society	1992-08-04	Phalanx - juvenile excellent distal phalanx; listed as Nodo or baby Diplo Toe Bone on specimen card No field notes
1933	Mymoorapelta maysi	Mygatt-Moore Quarry	Atlas		Dinamation International Society	1993-08-02	Atlas No field notes
1934	Allosaurus sp.	Mygatt-Moore Quarry	phalanx, pes		Dinamation International Society		Phalanx, pes No field notes Phalanx 3 on digit IV, excellent condition, distal edge restored; listed as metatarsal on DIS specimen card
1935	Allosaurus sp.	Mygatt-Moore Quarry	cervical rib		Dinamation International Society		Rib, cervical
1936	Allosaurus sp.	Mygatt-Moore Quarry	phalanx, manus		Dinamation International Society	1992-10-04	Phalanx, manus ends eroded; listed as a Allo metacarpal by DIS Pebble beds N 1005.2, E 997.2 L 10.4, W 4.4
1938	Allosaurus sp.	Mygatt-Moore Quarry	phalanx, manus		Dinamation International Society	1993-06-16	Phalanx, manus. Extreme distal end and part of proximal tip eroded. No field notes DIS tag: listed as 3rd metacarpal 30cm above Pond beds N 1008.3, E 997.7 L 5.3, W 2.7
1939	Allosaurus sp.	Mygatt-Moore Quarry	metatarsal	D-1997.2.1	Dinamation International Society	1993-06-16	metatarsal On DIS tag remarked as "phalanx (R.S.)" Rod Scheetz? see Notes 20cm above Pebble layer (DIS tag says in Pebble beds) Easting: 997.0, Northing: 1011.75 (DIS tag says E 989.1, N 994.9) Length: 10cm, Width: 4.5cm and 3cm (DIS tag says L 9.8, W 4.1)
1940	Allosaurus sp.	Mygatt-Moore Quarry	vertebra, caudal, median		Museums of Western Colorado	1993-11-14	Vertebra, caudal, median No field notes
1942	Allosaurus sp.	Mygatt-Moore Quarry	ischium?			1991-07-08	Ischium? No field notes
1943	Allosaurus? sp.	Mygatt-Moore Quarry	chevron		Dinamation International Society	1994-05-31	Chevron Duplicate field number with MWC 1944 28 cm above Pond Easting: 997 Northing: 1010.2
1944	Sauropoda indet.	Mygatt-Moore Quarry	bone fragment	FIC2009		1994-05-31	Bone fragment, flat, bite marked with serration striae Duplicate field number with MWC 1943 25cm above Pebble bed Easting: 997 Northing: 1010.2
1946	Apatosaurus excelsus	Mygatt-Moore Quarry	cervical vertebra		Museums of Western Colorado		vertebra, cervical No field notes
1948	Apatosaurus sp.	Mygatt-Moore Quarry	fibula or radius		Dinamation International Society	1994-06-07	Fibula or radius On pebble bed Easting: 994 Northing: 1005
1950	Sauropoda	Mygatt-Moore Quarry	vertebrae, caudal, mesial			1992-09-10	Vertebrae, caudal, mesial No field notes
2200	Sauropoda indet.	Mygatt-Moore Quarry	limb bone fragment		Dinamation International Society		limb bone fragment On Pebble bed Easting: 995.15 Northing: 1005.9 Length: 13cm Width: 3cm
2201	Sauropoda indet.	Mygatt-Moore Quarry	vertebra, zygapophysis, partial		Museums of Western Colorado		vertebra, zygapophysis, partial 60cm above Pebble bed Easting: 993.2 Northing: 1005.0
2203	Sauropoda indet.	Mygatt-Moore Quarry	rib or scapula, partial		Museums of Western Colorado		Rib or scapula, partial No field notes
2204	Sauropoda indet.	Mygatt-Moore Quarry	rib, shaft, proximal		Museums of Western Colorado		Rib, shaft, proximal No field notes
2205	Sauropoda indet.	Mygatt-Moore Quarry	rib capitulum		Museums of Western Colorado		Rib capitulum No field notes
2206	Sauropoda indet.	Mygatt-Moore Quarry	rib head		Museums of Western Colorado		Rib, head No field notes
2208	Apatosaurus sp.	Mygatt-Moore Quarry	sternal plate		Museums of Western Colorado		Sternal plate No field notes
2212	Apatosaurus sp.	Mygatt-Moore Quarry	rib shaft		Museums of Western Colorado		rib shaft No field notes
2213	Sauropoda indet.	Mygatt-Moore Quarry	rib, midsection		Museums of Western Colorado		Rib, midsection No field notes
2217	Allosaurus sp.	Mygatt-Moore Quarry	dorsal vertebra				Dorsal vertebra No field notes
2218	Sauropoda	Mygatt-Moore Quarry	vertebra frags, pneumatic cavities				Vertebra fragments, pneumatic cavities No field notes
2522	Sauropoda indet.	Mygatt-Moore Quarry	vertebra, caudal, distal		Museums of Western Colorado	1993-01-01	vertebra, caudal, distal No field notes. Found on bottom side of block containing the giant pelvis.
2524	Sauropoda	Mygatt-Moore Quarry	astragalus		Museums of Western Colorado		Astragalus No field notes
2526	Sauropoda indet.	Mygatt-Moore Quarry	rib head	FIC2009	Museums of Western Colorado	1992-09-08	Rib head, with ? No field notes 5cm below top of Pebble bed E 1005.8 N 998.0
2531	Apatosaurus ? sp.	Mygatt-Moore Quarry	Metacarpal I		Museums of Western Colorado	1992-09-22	Metacarpal I, right Bite marks on ventral margin. Old tag says prob. Camarasaur - too long for Apatosaur.
2532	Sauropoda indet.	Mygatt-Moore Quarry	Chevron		Museums of Western Colorado	1990-08-14	Chevron No contact between distal end and shaft. Single large bite mark on laterodistal surface. Apatosaurus ?
2533	Allosaurus sp.	Mygatt-Moore Quarry	ulna or radius		Dinamation International Society	1993-08-03	Ulna per DIS tag: radius Pond bottom 1005.8N 996E No field notes
2535	Sauropoda indet.	Mygatt-Moore Quarry	Cervical rib and parapophysis		Museums of Western Colorado	1990-09-02	Cervical rib and parapophysis
2536	Apatosaurus sp.	Mygatt-Moore Quarry	neural spine		Dinamation International Society	1990-09-11	Neural spine No field notes
2537	Apatosaurus sp.	Mygatt-Moore Quarry	vertebra, caudal, distal		Museums of Western Colorado	1987-07-26	Vertebra, caudal, distal No field notes
2539	Apatosaurus sp.	Mygatt-Moore Quarry	vertebra, cervical, cranial	FIC2011	Museums of Western Colorado		Vertebra, cervical, cranial
2543	Sauropoda indet.	Mygatt-Moore Quarry	chevron		Museums of Western Colorado	1990-08-14	Chevron Odd shaped? Possibly broken and rehealed. No field notes
2545	Apatosaurus sp.	Mygatt-Moore Quarry	coracoid				Coracoid No field notes
2547	Apatosaurus sp.	Mygatt-Moore Quarry	coracoid				Coracoid No field notes
2552	Apatosaurus sp.	Mygatt-Moore Quarry	vertebra, caudal, proximal				Vertebra, Caudal, proximal No field notes
2554	Unknown	Mygatt-Moore Quarry					No field notes
2556	Apatosaurus sp.	Mygatt-Moore Quarry	vertebra, cervical, ant proximal				Vertebra, Cervical, ant proximal No field notes
2557	Apatosaurus sp.	Mygatt-Moore Quarry	vertebra, cervical, centrum				Vertebra, cervical, centrum No field notes
2558	Apatosaurus sp.	Mygatt-Moore Quarry	vertebra, dorsal, mid or post			1990-08-14	Vertebra, Dorsal, mid or post No field notes
2678	Mymoorapelta maysi	Mygatt-Moore Quarry	caudal spine		Museums of Western Colorado	1994-08-09	Armor, caudal spine, high 30 cm above pebble bed Easting: 999.1 Northing: 1009.7 Length: 27cm
2683	Sauropoda	Mygatt-Moore Quarry	bone frag				Tooth-marked bone fragment Field ID: z-joint? 30 cm above pebble bed Easting: 994 Northing: 1005.8 Length: 17cm Width: 7cm
2709	Allosaurus sp.	Mygatt-Moore Quarry	distal end of tibia		Dinamation International Society		Tibia (?) dital end, broken prior to burial has round metal tag attached "DIS, 5-95, no #"
2710	Sauropoda indet.	Mygatt-Moore Quarry	rib		Dinamation International Society	1992-06-06	Rib, mid-section No field notes Has Other # on piece of brown tape and round tag attached with string 11/19
2712	Sauropoda	Mygatt-Moore Quarry	rib		Dinamation International Society	1992-06-16	Rib No field notes
2720	Sauropoda indet.	Mygatt-Moore Quarry	rib		Dinamation International Society		Rib, mid-section has round metal-edged tag attached with string: DIS, 5-95, No#
2723	Sauropoda	Mygatt-Moore Quarry	vertebra, caudal		Dinamation International Society	1994-06-06	Vertebra, Caudal On pebble bed Easting: 996.6 Northing: 1005.5 Length: 22cm Width: 15cn Thick: 12cm
2724	Sauropoda	Mygatt-Moore Quarry	vertebra, caudal		Dinamation International Society		Vertebra, Caudal No field notes
2726	Allosaurus sp.	Mygatt-Moore Quarry	vertebra, dorsal, neural arch		Dinamation International Society		vertebra, dorsal, neural arch
2727	Allosaurus fragilis	Mygatt-Moore Quarry	vertebra, caudal, proximal		Dinamation International Society		Vertebra, Caudal, proximal No field notes
2729	Allosaurus sp.	Mygatt-Moore Quarry	vertebra		Dinamation International Society	1994-07-25	Vertebra, dorsal centrum with base of neural arch; edges eroded; ID as caudal or dorsal on DIS tag 25cm above Pebble bed N 1007.5 E 993.8
2730	Allosaurus sp.	Mygatt-Moore Quarry	vertebra		Dinamation International Society	1994-07-18	Vertebra, dorsal On Pebble bed N1007.4 E994.05 centrum eroded on edges and dorsally; ID as caudal on DIS specimen card
2731	Allosaurus sp.	Mygatt-Moore Quarry	metatarsal		Dinamation International Society	1993-10-05	Metatarsal on Pebble bed 1007.0N 997.1E No field notes
2733	Camarasaurus sp.	Mygatt-Moore Quarry	chevron		Dinamation International Society	1994-07-13	Chevron excellent mid-chevron with anterior edge restored On Pebble bed, Good condition Easting: 992.7 Northing: 1004.6 Length: 36cm Width: 8cm
2734	Sauropoda indet.	Mygatt-Moore Quarry	vertebra, dorsal, zygapophysis		Dinamation International Society	1994-05-31	Vertebra, dorsal, large zygapophysis 60cm above Pebble bed Easting: 993.2 Northing: 1005.0 Length: 24.8cm Width: 11.3cm Thick: 10.15cm
2735	Sauropoda indet.	Mygatt-Moore Quarry	Vertebra, caudal?, neural arch	D-1995.1.1	Museums of Western Colorado	1995-06-29	Vertebra, caudal?, neural arch Fair/good condition Easting: 905 Northing: 996
2737	Mymoorapelta maysi	Mygatt-Moore Quarry	scute		Dinamation International Society	1993-08-16	Scute No field notes
2738	Apatosaurus sp.	Mygatt-Moore Quarry	vertebra, caudal, proximal		Museums of Western Colorado	1992-09-25	Vertebra, Caudal, proximal No field notes
2739	Apatosaurus sp.	Mygatt-Moore Quarry	vertebra, caudal, proximal		Museums of Western Colorado		Vertebra, Caudal, proximal No field notes
2740	Allosaurus fragilis	Mygatt-Moore Quarry	caudal vertebra		Dinamation International Society	1994-07-18	Vertebra, caudal distal caudal centrum, edges eroded On Pebble bed Easting: 994.4 Northing: 1007.75 Length: 11cm Width: 5cm
2741	Allosaurus sp.	Mygatt-Moore Quarry	vertebra, caudal		Dinamation International Society		Vertebra, caudal distal caudal complete, excellent, one prezag partially restored
2742	Allosaurus sp.	Mygatt-Moore Quarry	phalanx, pes		Dinamation International Society	1994-06-07	Phalanx, pes On Pebble bed Easting: 993.9 Northing: 1005 Length: 6cm
2743	Allosaurus sp.	Mygatt-Moore Quarry	chevron		Dinamation International Society	1994-06-06	Chevron with prominent score on latral shaft missing distal tip per DIS tag collected 5cm above Pond beds
2744	Allosaurus sp.	Mygatt-Moore Quarry	phalanx, pes		Dinamation International Society	1993-07-05	Phalanx, pes No field notes on Pebble bed excellent toe bone from pes, little bit of prox edge gone, little restoration DIS labeled it as a metatarsal
2763	Allosaurus sp.	Mygatt-Moore Quarry	rib		Dinamation International Society	1992-10-05	Rib No field notes
2764	Allosaurus sp.	Mygatt-Moore Quarry	rib		Dinamation International Society	1992-07-07	rib, fragment of rib shaft No field notes
2765	Allosaurus sp.	Mygatt-Moore Quarry	skull bone fragments		Dinamation International Society		skull? bone fragments
2766	Dinosauria	Mygatt-Moore Quarry	bone fragment		Dinamation International Society	1993-09-12	unknown bone fragment interesting articular end with partial shaft No field notes
2831	Apatosaurus? sp.	Mygatt-Moore Quarry	proximal carpal?	D-1995.1.1	Museums of Western Colorado	1995-07-21	Proximal Carpal? -- Not Astragalus as previous ID. Juvenile. Strong groove at base of ascending... see notes! Good/Excellent condition Easting: 985.5 Northing: 992.4 100% completeness
2842	Camarasaurus sp.	Mygatt-Moore Quarry	humerus		Museums of Western Colorado	1995-06-26	Humerus No field notes
2843	Mymoorapelta maysi	Mygatt-Moore Quarry	Jugal with horn (quadradojugal)	D-1995.2.1	Museums of Western Colorado	1995-06-21	Jugal with horn (quadradojugal) Field ID: nodosaur spine On pebble bed Easting: 996.3 Northing: 1009.7 Dinamation
2846	Allosaurus sp.	Mygatt-Moore Quarry	metatarsal III		Museums of Western Colorado	1995-10-07	Metatarsal III No field notes
2847	Camarasaurus sp.	Mygatt-Moore Quarry	caudal vertebra		Museums of Western Colorado	1995-05-13	Vertebra, Caudal, mid-series
2848	Allosaurus sp.	Mygatt-Moore Quarry	fibula	D-1995.2.1	Dinamation International Society	1995-06-26	Fibula On pebble bed Easting: 990.5 Northing: 1003.4 Length: 38cm Width: 5cm and 4cm
2850	Allosaurus fragilis	Mygatt-Moore Quarry	femur		Dinamation International Society		femur On pebble bed
2851	Allosaurus sp.	Mygatt-Moore Quarry	phalanx		Dinamation International Society		Phalanx No field notes
2852	Unknown	Mygatt-Moore Quarry	phalanx	D-1995.2.1	Dinamation International Society		Phalanx Field ID: allosaurus phalange 50 cm above pebble bed Easting: 988.90 Northing: 1006.45 Length: 9.5cm Width: 5.5cm
2853	Allosaurus sp.	Mygatt-Moore Quarry	phalanx		Dinamation International Society	1995-05-29	Phalanx Easting: 999.0 Northing: 1004.6 Length: 12cm Width: 5cm
2854	Allosaurus sp.	Mygatt-Moore Quarry	phalanx		Dinamation International Society		Phalanx No field notes
2855	Allosaurus sp.	Mygatt-Moore Quarry	phalanx	D-1995.2.1	Dinamation International Society	1995-08-22	Phalanx Pebble bed Easting: 990.6 Northing: 1005.5 Length: 10cm
2856	Allosaurus sp.	Mygatt-Moore Quarry	phalanx		Dinamation International Society	1994-05-26	Phalanx 27 cm above pebble bed Easting: 993.75 Northing: 1005.9 Length: 8cm Width: 5cm Height: 3.5cm
2857	Allosaurus sp.	Mygatt-Moore Quarry	phalanx	D-1994.2.1	Dinamation International Society	1994-06-07	Phalanx Duplicate field number with MWC 2742 On Pebble bed Easting: 993.8 Northing: 1005 Length: 6cm
2859	Allosaurus sp.	Mygatt-Moore Quarry	metatarsal II	D-1995.2.1	Dinamation International Society	1995-09-18	Metatarsal II Duplicate field number with MWC 3732 On Pebble bed Easting: 990.4 Northing: 1006.2 Length: 30cm Width: 7cm
2860	Unknown	Mygatt-Moore Quarry	metatarsal III		Dinamation International Society	1993-09-24	Metatarsal III Field ID: allo toe bone On pebble bed Easting: 995.0 Northing: 1005.3
2861	Allosaurus sp.	Mygatt-Moore Quarry	vertebra, dorsal, posterior		Dinamation International Society		Vertebra, Dorsal, posterior No field notes
2862	Allosaurus sp.	Mygatt-Moore Quarry	ungual		Dinamation International Society		Ungual No field notes
2863	Sauropoda indet.	Mygatt-Moore Quarry	vertebra? fragment	D-1995.2.1	Dinamation International Society		Vertebra? fragment . Field ID: scapula? Note: Harold Bollan swears it is the left ischium of a nodosaur. On Pebble bed Easting: 991.2 Northing: 1005.25 Dinamation
2864	Camarasaurus sp.	Mygatt-Moore Quarry	vertebra, dorsal		Dinamation International Society	1993-06-21	Vertebra, dorsal, No field notes
2865	Apatosaurus sp.	Mygatt-Moore Quarry	vertebra, dorsal		Dinamation International Society	1995-05-30	Vertebra, dorsal 80 cm above pebble bed Easting: 1000.4 Northing: 1010.25 Field notes: much missing, but important specimen
2866	Sauropoda	Mygatt-Moore Quarry	humerus		Dinamation International Society		Humerus No field notes
2867	Mymoorapelta maysi	Mygatt-Moore Quarry	Spine		Dinamation International Society	1994-07-16	Spine, lateral Field ID: nodosaur spine 20 cm above pebble bed Easting: 998 Northing: 1009.45 Length: 20cm Width: 13cm
2868	Mymoorapelta maysi	Mygatt-Moore Quarry	spine	D-1995.2.1	Dinamation International Society	1995-09-18	Spine, lateral 10cm above pebble bed Easting: 1000.9 Northing: 1010.9 Dinamation
2869	Apatosaurus sp.	Mygatt-Moore Quarry	vertebra, dorsal, centrum		Dinamation International Society		Vertebra, dorsal, centrum On pebble bed Easting:994.05 Northing: 1005.35
2873	Allosaurus sp.	Mygatt-Moore Quarry	phalanx		Dinamation International Society		Phalanx No field notes
2876	Sauropoda	Mygatt-Moore Quarry	Long bone frag		Dinamation International Society		Long bone fragment Field ID: caudal vert Duplicate field number with MWC 3600 25 cm above pebble bed Easting: 995.8 Northing: 1006
2877	Sauropoda	Mygatt-Moore Quarry	long bone? fragment		Dinamation International Society		Long bone? fragment No field notes
2878	Allosaurus sp.	Mygatt-Moore Quarry	femur		Dinamation International Society		Femur, distal 1/3 only No field notes
2879	Sauropoda	Mygatt-Moore Quarry	epipodial, proximal end		Dinamation International Society		Epipodial, proximal end Tooth Marked No field notes
2880	Allosaurus sp.	Mygatt-Moore Quarry	tibia, distal 1/3	D-1995.2.1	Dinamation International Society		Tibia, distal 1/3 On pebble bed Easting: 992.85 Northing: 1007.25
2881	Unknown	Mygatt-Moore Quarry	vertebra or braincasse		Dinamation International Society		Vertebra or braincase No field notes
2882	Sauropoda indet.	Mygatt-Moore Quarry	Fibula?	D-1995.2.1	Dinamation International Society	1995-07-18	Fibula? On Pebble bed Easting: 998.90 Northing: 1010.8 Length: 20cm Width: 12cm
2886	Apatosaurus sp.	Mygatt-Moore Quarry	coracoid		Museums of Western Colorado		Coracoid No field notes
2888	Apatosaurus sp.	Mygatt-Moore Quarry	vertebra, caudal, proximal		Dinamation International Society		Vertebra, caudal, proximal On pebble bed Easting: 996.45 Northing: 1009.35 Length: 50cm Width: 40cm
2890	Allosaurus fragilis	Mygatt-Moore Quarry	manual claw	D-1997.1.1	Museums of Western Colorado		manual claw No field notes
2895	Apatosaurus sp.	Mygatt-Moore Quarry	vertebra, caudal, mid series		Dinamation International Society		Vertebra, caudal, mid series No field notes
2923	Sauropoda indet.	Mygatt-Moore Quarry	chevron		Museums of Western Colorado	1996-07-26	Chevron 100% complete L: 36.0cm
2925	Apatosaurus sp.	Mygatt-Moore Quarry	vertebra, distal, caudal		Museums of Western Colorado		Vertebra, distal, caudal No field notes
2926	Sauropoda	Mygatt-Moore Quarry	vertebra, transverse process, distal end		Museums of Western Colorado		Vertebra, transverse process, distal end No fied notes
2928	Sauropoda indet.	Mygatt-Moore Quarry	metapodial		Museums of Western Colorado		Metapodial, specimen is labeled McV with black marker No field notes
2929	Sauropoda indet.	Mygatt-Moore Quarry	chevron		Museums of Western Colorado	1990-07-17	Chevron, proximal end only collected from site #1.05.90
2930	Camarasaurus sp.	Mygatt-Moore Quarry	vertebra, caudal, midseries		Museums of Western Colorado	1996-08-15	Vertebra, caudal, midseries No field notes
2931	Camarasaurus sp.	Mygatt-Moore Quarry	vertebra, caudal, midseries		Museums of Western Colorado	1996-08-02	Vertebra, caudal, midseries No field notes
2933	Sauropoda	Mygatt-Moore Quarry	fibula		Museums of Western Colorado		Fibula No field notes
2934	Sauropoda indet.	Mygatt-Moore Quarry	vertebra, caudal?, partial neural arch		Dinamation International Society	1993-09-06	Vertebra, caudal?, partial neural arch No field notes per DIS tag "interesting large lump of bone" pond 10cm above N1005.9 E 995.2
2935	Allosaurus sp.	Mygatt-Moore Quarry	phalanx		Museums of Western Colorado	1992-08-06	Phalanx Field ID: Allo. toe bone On Pebble bed N 1003.9 E 97.9 No field notes
2936	Theropoda indet.	Mygatt-Moore Quarry	sacral rib		Museums of Western Colorado		Rib, sacral, tooth marks No field notes
2937	Apatosaurus sp.	Mygatt-Moore Quarry	vertebra, caudal, distal		Museums of Western Colorado		Vertebra, caudal, distal No field notes
2938	Apatosaurus sp.	Mygatt-Moore Quarry	vertebra, caudal, distal		Museums of Western Colorado	1995-06-26	Vertebra, caudal, distal Duplicate field number with MWC 3608 5 cm above pebble bed Easting: 991.25 Northing: 1006.40 Length: 9cm Width: 5.5cm
2939	Sauropoda indet.	Mygatt-Moore Quarry	long bone, rib?		Dinamation International Society		Long bone fragment, rib? Broken preburial 5% complete Length 302 Collected 1996
2940	Apatosaurus sp.	Mygatt-Moore Quarry	sacrum w/ both ilia and 5 sacrals		Museums of Western Colorado		Sacrum w/ both ilia and 5 sacrals No field notes
3560	Dinosauria	Mygatt-Moore Quarry	flat bone		Dinamation International Society	1994-06-07	flat bone Duplicate field number with MWC 2683 30 cm above pebble bed Easting: 994 Northing: 1005.8 Length: 17cm Width: 7cm
3561	Apatosaurus sp.	Mygatt-Moore Quarry	neural arch fragment	D-1996.1.1	Museums of Western Colorado	1996-08-15	neural arch fragment from large vertebra Bottom level of quarry Easting: 985 Northing: 1001
3562	Apatosaurus sp.	Mygatt-Moore Quarry	pneumatic internal portion of vertebra		Dinamation International Society	1994-06-07	pneumatic internal portion of vertebra On Pebble bed Easting: 993.5 Northing: 1003.8 Length: 9cm Width: 4cm
3563	Apatosaurus sp.	Mygatt-Moore Quarry	vertebra, centrum, posterior caudal	D-1995.1.1	Museums of Western Colorado	1995-08-21	vertebra, centrum, posterior caudal Field ID: Sauropod metapoidal Poor/Fair condition, 90-100% completeness Easting: 994.6 Northing: 998.5 Notes: one end soft
3564	Apatosaurus sp.	Mygatt-Moore Quarry	chevron	D-1996.1.1	Museums of Western Colorado	1996-06-20	chevron Mid level of quarry 100% completeness Easting: 989 Northing: 992
3565	Apatosaurus sp.	Mygatt-Moore Quarry	vertebra, partial centrum		Museums of Western Colorado	1991-10-24	vertebra, partial centrum No field notes
3567	Allosaurus sp.	Mygatt-Moore Quarry	vertebra, partial neural arch		Museums of Western Colorado	1993-09-28	vertebra, partial neural arch No field notes
3568	Mymoorapelta maysi	Mygatt-Moore Quarry	rib		Dinamation International Society	1994-05-31	rib Field ID: nodosaur rib 25 cm above pebble bed Easting: 995.9 Northing: 1009.75 Length: 7.5cm
3569	Apatosaurus sp.	Mygatt-Moore Quarry	rib		Museums of Western Colorado	1996-06-28	rib No field notes
3570	Allosaurus sp.	Mygatt-Moore Quarry	rib		Museums of Western Colorado	1996-08-05	Rib No field notes
3571	Allosaurus sp.	Mygatt-Moore Quarry	rib		Museums of Western Colorado	1996-08-05	Rib long bone plus small pieces in tray 11/19 HES
3572	Apatosaurus sp.	Mygatt-Moore Quarry	rib?	D-1996.1.1	Museums of Western Colorado	1996-08-05	rib? Low level of quarry, Good condition 20-50% Completeness Easting: 986 Northing: 1000 Notes: wide rib section
3573	Allosaurus sp.	Mygatt-Moore Quarry	rib		Museums of Western Colorado	1996-08-05	Rib No field notes
3574	Apatosaurus sp.	Mygatt-Moore Quarry	radius		Museums of Western Colorado		radius No field notes
3575	Apatosaurus sp.	Mygatt-Moore Quarry	phalange, R. pes or manus IV-I		Museums of Western Colorado		phalange round tag says "Manus IV-1, Right (with initials) JSM, Goes with Bite-marked caudal vert" other side of round tag says "phalanx from block prep. by Charlie" another note in tray says "R. pes IV-I" with puncture marks? HES 10/19
3579	Apatosaurus sp.	Mygatt-Moore Quarry	Partial shaft of limb bone	D-1996.1.1	Museums of Western Colorado	1996-08-02	partial shaft of limb bone Field ID: vertebra, caudal Bottom level of quarry Good condition, 75-100% completeness Easting: 985 Northing: 900
3580	Apatosaurus sp.	Mygatt-Moore Quarry	vertebra, dorsal spine top	D-1996.1.1	Museums of Western Colorado	1996-07-26	vertebra, dorsal spine top Mid level of quarry Fair condition Easting: 984 Northing: 998 Field Notes: only spine, near vertical, spine-top directed down
3581	Apatosaurus sp.	Mygatt-Moore Quarry	chevron	D-1995.1.1	Museums of Western Colorado	1995-07-20	chevron Good condition 50% completeness Notes: strong striations
3582	Allosaurus sp.	Mygatt-Moore Quarry	rib	FIC2009	Museums of Western Colorado		rib? No field notes
3583	Apatosaurus sp.	Mygatt-Moore Quarry	distal caudal centrum	D-1996.1.1	Museums of Western Colorado	1996-06-11	distal caudal ("whiplash caudal") - advanced weathering present, no cortical tissue left Field ID: Metapoidal? Good/Excellent condition 75-100% completeness
3584	Sauropoda indet.	Mygatt-Moore Quarry	whiplash caudal	D-1995.1.1	Museums of Western Colorado	1995-06-01	whiplash caudal vertebra? extreme distal caudal??? or radius of small animal No field notes
3585	Sauropoda indet.	Mygatt-Moore Quarry	chevron	D-1995.1.1	Museums of Western Colorado	1995-07-20	chevron 25% coompleteness Fair condition
3587	Apatosaurus sp.	Mygatt-Moore Quarry	rib	D-1996.1.1	Museums of Western Colorado	1996-08-05	rib Duplicate field number with MWC 3572 Low level of quarry, Good condition, 25-50% completeness Easting: 986 Northing: 1000 Field Notes: wide rib section
3588	Apatosaurus sp.	Mygatt-Moore Quarry	rib		Museums of Western Colorado		rib No field notes
3589	Apatosaurus sp.	Mygatt-Moore Quarry	partial zygapophysis		Dinamation International Society	1993-09-26	partial zygapophysis off vertebra No field notes on Pebble bed E 1005.7 N 995.0
3590	Apatosaurus sp.	Mygatt-Moore Quarry	partial neural arch? off vertebra	D-1996.1.1	Museums of Western Colorado	1996-07-27	partial neural arch?? off vertebra High level of quarry Fair condition 10% completeness Easting: 985 Northing: 992
3600	Allosaurus sp.	Mygatt-Moore Quarry	phalange, manus	D-1995.2.1	Dinamation International Society		phalange, manus Field ID: phalanx, in cast with caudal vert Duplicate field number with MWC 2876 25cm above Pebble bed Easting: 995.8 Northing: 1006
3601	Allosaurus sp.	Mygatt-Moore Quarry	phalange, manus	D-1995.2.1	Dinamation International Society	1995-08-22	phalange, manus Pebble bed Easting: 990.5 Northing: 1004.4 Length: 10cm
3602	Allosaurus sp.	Mygatt-Moore Quarry	phalange, manus		Dinamation International Society	1995-07-17	phalange, manus DIS tag: metatarsal corrected to metacarpal In Pebble bed Easting: 995 Northing: 1008.70 Length: 12cm
3603	Allosaurus sp.	Mygatt-Moore Quarry	phalange, manus		Dinamation International Society	1993-06-16	phalange, manus No field notes per DIS tag: metatarsal, metacarpal N 1002.2 E 997.6
3604	Allosaurus sp.	Mygatt-Moore Quarry	phalange, manus	D-1995.2.1	Dinamation International Society	1995-08-07	phalange, manus per DIS tag: Falange (sic) On Pebble bed Easting: 992.2 Northing: 1007.35 Length: 7cm Width: 3.5cm
3605	Allosaurus sp.	Mygatt-Moore Quarry	phalange, pes		Dinamation International Society	1994-08-03	phalange, pes per DIS tag: 1st thumb phalanges Left On Pebble bed Easting: 995 Northing: 1007.15 Length: 15cm Width: 7cm
3606	Allosaurus sp.	Mygatt-Moore Quarry	phalange, pes		Museums of Western Colorado	1995-07-13	phalange, pes No field notes per plastic bag piece: "Tarsal (?) collected 7/13/95 loose on surface in exposed bone area - Dinamation side, Mygatt-Moore Quarry, pebble congl. base layer"
3607	Allosaurus sp.	Mygatt-Moore Quarry	cervical rib		Dinamation International Society	1994-09-20	cervical rib On Pebble bed Easting: 999.75 Northing: 1009.3 Length: 35cm
3608	Allosaurus sp.	Mygatt-Moore Quarry	vertebra, caudal centrum		Dinamation International Society	1995-07-12	vertebra, caudal centrum Duplicate field number with MWC 2938 5 cm above Pebble bed Easting: 991.25 Northing: 1006.40 Length: 9.8cm Width: 5.5cm
3609	Allosaurus fragillis	Mygatt-Moore Quarry	vertebra, caudal posterior		Dinamation International Society	1995-06-12	vertebra, caudal posterior (distal) Upper Pebble bed Easting: 998.0 Northing: 1010.1 Length: 15cm and 9cm
3610	Camarasaurus sp.	Mygatt-Moore Quarry	chevron		Dinamation International Society	1993-06-22	chevron No field notes Per DIS tag: mid-caudal st...(?)s up off of Pebble bed
3611	Allosaurus sp.	Mygatt-Moore Quarry	rib	D-1995.2.1	Dinamation International Society	1995-07-12	rib 35 cm above Pebble bed Easting: 998.35 Northing: 1010.45 Length: 35cm
3612	Allosaurus sp.	Mygatt-Moore Quarry	vertebra, partial centrum		Dinamation International Society	1993-09-20	vertebra, partial centrum No field notes on Pebble bed
3613	Mymoorapelta maysi	Mygatt-Moore Quarry	vertebra, dorso-sacral centrum		Dinamation International Society	1993-07-27	vertebra, dorso-sacral centrum No field notes
3614	Sauropoda indet.	Mygatt-Moore Quarry	phalange, manus		Dinamation International Society	1993-06-14	phalange, manus No field notes
3615	Mymoorapelta maysi	Mygatt-Moore Quarry	phalange, manus	D-1995.2.1	Dinamation International Society	1995-09-18	phalange, manus Field ID: sauropod phalanx On pebble bed Easting: 989.2 Northing: 1005.50 Dinamation
3616	Mymoorapelta maysi	Mygatt-Moore Quarry	phalange, carpal	D-1995.2.1	Dinamation International Society	1995-06-26	phalange, carpal Field ID: small toe bone 20 cm above pebble bed Easting: 999.4 Northing: 1010.5 Length: 3cm Width: 1.5cm Dinamation
3617	Allosaurus sp.	Mygatt-Moore Quarry	chevron		Dinamation International Society	1994-08-22	chevron On Pebble beds Easting: 999.6 Northing: 1009.4 Length: 17cm
3618	Allosaurus sp.	Mygatt-Moore Quarry	bent cervical rib, or furcula?		Dinamation International Society	1993-08-02	cervical rib, bent, or furcula? No field notes
3619	Allosaurus sp.	Mygatt-Moore Quarry	cervical rib	D-1995.2.1	Dinamation International Society	1995-06-27	cervical rib On Pebble bed Easting: 999.2 Northing: 1010.25 Length: 24cm Width: 16cm
3620	Mymoorapelta maysi	Mygatt-Moore Quarry	rib fragment		Dinamation International Society	1993-08-02	rib fragment No field notes
3623	Allosaurus sp.	Mygatt-Moore Quarry	zagapophysis	FIC2009	Dinamation International Society	1992-09-08	zagapophysis No field notes
3624	Allosaurus sp.	Mygatt-Moore Quarry	sternal? rib		Dinamation International Society	1993-07-05	sternal? rib No field notes
3625	Allosaurus sp.	Mygatt-Moore Quarry	rib	D-1995.2.1	Dinamation International Society	1995-09-17	rib, fragment Pebble bed Easting: 991.4 Northing: 1007.1
3626	Apatosaurus sp.	Mygatt-Moore Quarry	rib head		Dinamation International Society	1992-10-11	rib head No field notes.
3627	Dinosauria indet.	Mygatt-Moore Quarry	phalange articular ends	FIC2009	Dinamation International Society	1993-06-14	phalange?, eroded and incomplete articular ends Nodosauridae?? No field notes
3628	Allosaurus sp.	Mygatt-Moore Quarry	skull element? neural arch?	D-1995.2.1	Dinamation International Society	1995-09-17	skull element?? or just part of neural arch? Pebble bed Easting: 991.4 Northing: 1007.1
3629	Mymoorapelta maysi	Mygatt-Moore Quarry	scutes (8)	FIC2009	Dinamation International Society		scutes (8) No field notes
3630	Camarasaurus grandis	Mygatt-Moore Quarry	dorsal centrum, vertebra	D-1995.2.1	Dinamation International Society	1995-09-18	Vertebra, dorsal centrum, juvenile Field ID: dorsal allosaur vertebra On Pebble bed Easting: 1000.2 Northing: 1010.6
3631	Allosaurus sp.	Mygatt-Moore Quarry	vertebra, dorsal centrum		Dinamation International Society		vertebra, dorsal centrum No field notes
3633	Apatosaurus sp.	Mygatt-Moore Quarry	vertebra, dorsal centrum		Dinamation International Society		vertebra, dorsal centrum On pebble bed Easting: 1000.80 Northing: 1009.55 Length: 32cm Width: 21cm
3634	Apatosaurus sp.	Mygatt-Moore Quarry	vertebra, caudal		Dinamation International Society	1995-06-27	vertebra, caudal On pebble bed Easting: 991.25 Northing: 1005.50 Length: 10cm Width: 8cm
3635	Allosaurus sp.	Mygatt-Moore Quarry	vertebra, sacral centra		Dinamation International Society	1994-06-06	vertebrae, sacral centra Field ID: fused allo vertebrae On pond Easting: 993.4 Northing: 1004.25 Length: 25cm Width: 12cm
3636	Sauropoda indet.	Mygatt-Moore Quarry	caudal vertebra	D-1995.2.1	Dinamation International Society	1995-06-26	small sauropod caudal vertebra On Pebble bed Easting: 998.65 Northing: 1010.2 Length: 8cm Width: 6cm
3637	Allosaurus sp.	Mygatt-Moore Quarry	vertebra, dorsal centrum		Dinamation International Society	1995-05-30	vertebra, dorsal centrum 20 cm above pebble bed Easting: 999.7 Northing: 1009.7 Length: 15cm Width: 12cm
3638	Sauropoda indet.	Mygatt-Moore Quarry	internal pneumatic infrastructure from vertebra		Dinamation International Society	1995-06-27	internal pneumatic infrastructure from vertebra Apatosaur? Field ID: cervical frag.? On Pebble bed Easting: 998.70 Northing: 1010.45 Length: 8cm Width: 8cm
3640	Allosaurus sp.	Mygatt-Moore Quarry	vertebra, sacral centra		Dinamation International Society	1994-07-10	vertebrae, sacral centra Field ID: Apato. metatarsal? On Pebble bed Easting: 993.3 Northing: 1005.9 Length: 15cm Width: 6cm Thick: 5cm
3641	Allosaurus sp.	Mygatt-Moore Quarry	vertebra, caudal centrum		Dinamation International Society	1992-08-17	vertebra, caudal centrum top 10cm of Pebble bed No field notes
3642	Allosaurus sp.	Mygatt-Moore Quarry	caudal centrum, vertebra	D-1995.2.1	Dinamation International Society	1995-08-02	vertebra, caudal centrum Field ID: camarasaur caudal vert 10 cm above Pebble bed Easting: 993.25 Northing: 1007.55 Length: 10cm Width: 5cm
3644	Allosaurus fragilis	Mygatt-Moore Quarry	dorsal centrum		Dinamation International Society	1993-09-20	vertebra, dorsal centrum No field notes On Pebble bed 1007.5N 996.3E
3645	Allosaurus sp.	Mygatt-Moore Quarry	vertebra, dorsal centrum with neuropophyses		Dinamation International Society	1995-09-16	vertebra, dorsal centrum with neuropophyses In Pebble bed Easting: 994.30 Northing: 1007.70 Length: 18cm Width: 11cm Thick: 13cm
3646	Allosaurus sp.	Mygatt-Moore Quarry	partial astragulus		Dinamation International Society	1994-09-19	partial astragulus? Field ID: cervical vert, young sauropod On Pebble bed Easting: 991.2 Northing: 1006.1
3647	Allosaurus sp.	Mygatt-Moore Quarry	vertebra, caudal centrum		Dinamation International Society	1994-05-31	vertebra, caudal centrum On Pond bed Easting: 994.7 Northing: 1006.5 Length: 9cm Width: 4.5cm Thick: 3cm
3649	Apatosaurus sp.	Mygatt-Moore Quarry	vertebra, dorsal process	FIC2009	Museums of Western Colorado	1993-09-25	vertebra, dorsal process Easting: 986 Northing: 997
3651	Mymoorapelta maysi	Mygatt-Moore Quarry	vertebra, caudal	D-1997.1.1	Museums of Western Colorado	1996-08-20	Vertebra, caudal Duplicate field number with MWC 4022 Field ID: caudal, nodosaur Bottom level of quarry 100% completeness Easting: 985 Northing: 1000 Field notes: has part of TP of 111 and has a scute in hard concretion and matrix. R. Scheetz
3652	Mymoorapelta maysi	Mygatt-Moore Quarry	rib	D-1995.1.1	Museums of Western Colorado	1995-06-29	rib fragment field ID: nodosaur rib Fair/Good condition 10% completeness Easting: 985 Northing: 996 Notes: partial rib T-shaped cross section
3714	Mymoorapelta maysi	Mygatt-Moore Quarry	ungual		Dinamation International Society	1994-05-30	ungual Field ID: claw, nodosaur On pebble bed Easting: 995.8 Northing: 1005.5 Length: 5cm Width: 2.5cm
3725	Apatosaurus sp.	Mygatt-Moore Quarry	ischium? or illium?	D-1996.2.1	Dinamation International Society	1996-08-19	ischium? or illium? Duplicate field number with MWCs; 3774, 3750, 3773, 3726, 3770, 3772 On pebble bed Easting: 999.25 Northing: 1011.8
3726	Apatosaurus sp.	Mygatt-Moore Quarry	sacral rib	D-1996.2.1	Dinamation International Society	1996-07-03	sacral rib Duplicate field number with MWCs: 3774, 3725, 3773, 3770, 3772 On pebble bed Easting: 999.25 Northing: 1011.8
3727	Allosaurus sp.	Mygatt-Moore Quarry	distal end of femur or tibia		Dinamation International Society		distal end of femur or tibia No field notes
3728	Apatosaurus sp.	Mygatt-Moore Quarry	vertebra, partial centrum		Dinamation International Society		vertebra, partial centrum No field notes
3729	Allosaurus sp.	Mygatt-Moore Quarry	RIb	D-1996.2.1	Dinamation International Society	1996-08-20	Rib, fragment Field ID: allosaurus rib with head 20 cm above Pebble bed Easting: 999.25 Northing: 1011.75
3730	Allosaurus fragilis	Mygatt-Moore Quarry	ungual claw	D-1996.2.1	Dinamation International Society	1996-07-30	ungual claw On Pebble bed Easting: 995.1 Northing: 1010.0 Length: 15cm
3731	Apatosaurus sp.	Mygatt-Moore Quarry	chevron	D-1996.2.1	Dinamation International Society	1996-08-13	Chevron On Pebble bed Easting: 1002.55 Northing: 1011.1 Length: 9cm Width: 7cm
3732	Allosaurus sp.	Mygatt-Moore Quarry	vertebra, caudal centrum	D-1995.2.1	Dinamation International Society	1995-09-18	vertebra, caudal centrum, partial Field ID: found wth Allosaur metatarsal On Pebble bed Easting: 990.4 Northing: 1006.2
3733	Allosaurus sp.	Mygatt-Moore Quarry	phalange, manus		Dinamation International Society	1994-08-22	phalange, manus 30cm above Pebble bed Easting: 996.7 Northing: 1009.6 Length: 5cm
3734	Allosaurus sp.	Mygatt-Moore Quarry	ungual claw		Dinamation International Society	1996-08-31	ungual claw No field notes
3735	Allosaurus sp.	Mygatt-Moore Quarry	vertebra, caudal centrum		Dinamation International Society		vertebra, caudal centrum No field notes
3736	Allosaurus sp.	Mygatt-Moore Quarry	phalange, pes		Dinamation International Society	1996-08-13	phalange, pes DIS ID'd as metacarpal 40cm above Pebble bed Easting: 1004.41 Northing: 1012.0
3737	Sauropoda indet.	Mygatt-Moore Quarry	chevron		Dinamation International Society	1996-09-17	chevron Camarasaurus? or Apatosaurus? Duplicate field number with MWC 6974 On Pebble bed Easting: 1000 Northing: 1010.5 Length: 22cm
3738	Sauropoda indet.	Mygatt-Moore Quarry	vertebra, dorsal centrum	D-1996.2.1	Dinamation International Society	1996-07-09	vertebra, dorsal, centrum, juvenile On Pebble bed Easting: 1001.3 Northing: 1011.15 DIS tag: E 1005.5 N 1009.8 Length: 11cm Width: 11cm
3739	Apatosaurus sp.	Mygatt-Moore Quarry	vertebra, cervical		Dinamation International Society		vertebra, cervical, postzygapophysis, partial No field notes Collected in 1991?
3740	Apatosaurus sp.	Mygatt-Moore Quarry	vertebra, caudal, neural spine top	FIC2009	Dinamation International Society	1993-08-02	vertebra, caudal, neural spine top DIS tag: rib (end?) frag. bottom of P. bed N 100.3 E 995.15 No field notes
3741	Allosaurus sp.	Mygatt-Moore Quarry	tarsal	D-1996.2.1	Dinamation International Society	1996-07-08	tarsal Field note id: metatarsal On Pebble bed Easting: 1000.25 Northing: 1011.0 Length: 10cm Width: 5cm
3742	Allosaurus sp.	Mygatt-Moore Quarry	vertebra, caudal centrum	D-1996.2.1	Dinamation International Society	1996-08-19	vertebra, caudal centrum Pebble bed Easting: 1003.5 Northing: 1011.8 Length: 15cm in field
3743	Allosaurus sp.	Mygatt-Moore Quarry	vertebra, dorsal centrum		Dinamation International Society		vertebra, dorsal centrum On pebble bed Easting: 997.8 Northing: 1009.9
3744	Mymoorapelta maysi	Mygatt-Moore Quarry	cervical ring armor	D-1996.2.1	Dinamation International Society	1996-08-13	Cervical ring armor 40 cm above pebble bed Easting: 1001.15 Northing: 1011.9
3745	Allosaurus sp.	Mygatt-Moore Quarry	vertebra, caudal centrum		Dinamation International Society		vertebra, caudal centrum No field notes
3746	Allosaurus sp.	Mygatt-Moore Quarry	vertebra, dorsal centrum	D-1996.2.1	Dinamation International Society	1996-07-01	vertebra, dorsal centrum 20 cm above pebble bed Easting: 998.1 Northing: 1011.15 Length: 25cm
3747	Mymoorapelta maysi	Mygatt-Moore Quarry	rib		Dinamation International Society	1993-08-17	rib No field notes
3748	Allosaurus sp.	Mygatt-Moore Quarry	rib		Dinamation International Society	1993-08-17	rib No field notes
3749	Allosaurus sp.	Mygatt-Moore Quarry	vertebra, caudal centrum		Dinamation International Society	1994-06-13	vertebra, caudal centrum, partial On Pebble bed Easting: 995.3 Northing: 1007.3 Width: 2cm Thick: 7cm
3750	Allosaurus sp.	Mygatt-Moore Quarry	vertebra, dorsal, centrum	D-1996.2.1	Dinamation International Society		vertebra, dorsal, centrum Duplicate field number with MWCs: 3774, 3725, 3773, 3772, 3726, 3770 On pebble bed Easting: 999.25 Northing: 1011.8
3751	Allosaurus sp.	Mygatt-Moore Quarry	misc. bone, may be skull part		Dinamation International Society	1993-09-21	skull bone? No field notes
3752	Mymoorapelta maysi	Mygatt-Moore Quarry	ungual		Dinamation International Society	1994-07-06	ungual Field ID:nodosaur claw 30 cm above pebble bed Easting: 998.1 Northing: 1009.5 Length: 4cm
3753	Allosaurus sp.	Mygatt-Moore Quarry	phalange, manus		Dinamation International Society		phalange, manus No field notes
3754	Allosaurus sp.	Mygatt-Moore Quarry	chevron	D-1996.2.1	Dinamation International Society	1996-08-19	chevron 5 cm above pebble bed Easting: 1003.1 Northing: 1011.9 Length: 14cm
3755	Allosaurus sp.	Mygatt-Moore Quarry	chevron		Dinamation International Society	1995-06-26	chevron Field ID: allosaur chevron 20cm above Pebble bed Easting: 998.1 Northing: 1010.45 Length: 10cm Width: 3cm and 2cm
3757	Allosaurus sp.	Mygatt-Moore Quarry	chevron		Dinamation International Society	1994-05-31	Chevron, fragment 15cm above Pebble bed Easting: 997.2 Northing: 1009 Length: 85cm Width: 10cm
3758	Apatosaurus sp.	Mygatt-Moore Quarry	rib shaft		Dinamation International Society		rib shaft, partial No field notes
3759	Allosaurus sp.	Mygatt-Moore Quarry	metatarsal	D-1996.2.1	Dinamation International Society	1996-08-19	metatarsal On Pebble bed Easting: 1004.6 Northing: 1010.0 Length: 32cm Width: 7cm and 4cm
3760	Allosaurus sp.	Mygatt-Moore Quarry	metatarsal		Dinamation International Society	1993-06-08	metatarsal No field notes
3761	Allosaurus sp.	Mygatt-Moore Quarry	rib	D-1996.2.1	Dinamation International Society	1996-09-28	rib Duplicate field number with MWC 3766 On Pebble bed Easting: 1000.0 Northing: 1011.15
3762	Allosaurus sp.	Mygatt-Moore Quarry	partial rib shaft		Dinamation International Society	1993-06-08	partial rib shaft No field notes
3763	Mymoorapelta maysi	Mygatt-Moore Quarry	rib		Dinamation International Society		rib No field notes
3764	Allosaurus fragilis	Mygatt-Moore Quarry	ungual claw	D-1996.2.1	Dinamation International Society	1996-07-15	ungual claw 30 cm above Pebble bed Easting: 996.8 Northing: 1010.2
3765	Sauropoda indet.	Mygatt-Moore Quarry	chevron		Dinamation International Society		chevron
3766	Allosaurus sp.	Mygatt-Moore Quarry	phalange, manus	D-1996.2.1	Dinamation International Society		phalange, manus note in tray says metacarpal Duplicate field number with MWC 3761 On Pebble bed Easting: 1000.0 Northing: 1011.1
3767	Allosaurus sp.	Mygatt-Moore Quarry	vertebra, dorsal centrum		Dinamation International Society	1993-09-26	vertebra, dorsal centrum No field notes Per DIS tag: On Pebble bed N 1007.8 E 995.8
3768	Apatosaurus sp.	Mygatt-Moore Quarry	vertebra, dorsal, partial centrum		Dinamation International Society		vertebra, dorsal, partial centrum No field notes
3769	Sauropoda indet.	Mygatt-Moore Quarry	vertebra, cervical centrum		Dinamation International Society	1994-09-19	vertebra, cervical centrum, juvenile 10cm above Pebble bed Easting: 993.0 Northing: 1009.8 Length: 8cm Width: 5cm
3770	Apatosaurus sp.	Mygatt-Moore Quarry	vertebra	D-1996.2.1	Dinamation International Society	1996-08-19	vertebra, very eroded Duplicate field number with MWCs: 3774, 3725, 3750, 3773, 3726, 3772 On Pebble bed Easting: 999.25 Northing: 1011.8
3771	Apatosaurus sp.	Mygatt-Moore Quarry	vertebra	D-1996.2.1	Dinamation International Society		very eroded vertebra Easting: 1000.75 Northing: 1011.75
3772	Apatosaurus sp.	Mygatt-Moore Quarry	vertebra centrum	D-1996.2.1	Dinamation International Society		very eroded vertebra centrum Duplicate field number with MWCs: 3774, 3725, 3773, 3770, 3726 On pebble bed Easting: 999.25 Northing: 1011.8
3773	Apatosaurus sp.	Mygatt-Moore Quarry	partial pelvic bone?	D-1996.2.1	Dinamation International Society	1996-08-19	partial pelvic bone??? Duplicate field number with MWCs: 3774, 3725, 3750, 3770, 3726, 3772 On pebble bed Easting: 999.25 Northing: 1011.8
3774	Apatosaurus sp.	Mygatt-Moore Quarry	dorsal vertebra	D-1996.2.1	Dinamation International Society	1996-07-03	Vertebra, dorsal Duplicate field number with MWCs: 3725, 3750, 3773, 3726, 3770, 3772 On pebble bed Easting: 999.25 Northing: 1011.8
3775	Apatosaurus sp.	Mygatt-Moore Quarry	vertebra, dorsal, diapophysis		Dinamation International Society		vertebra, dorsal, diapophysis No field notes
3777	Dinosauria indet.	Mygatt-Moore Quarry	dorsal vertebra	D-1996.2.1	Dinamation International Society		vertebra, dorsal (Apatosaurus?) Specimen in tray marked N with arrow, and N1008 E996 (these nos. do not agree with those below) Duplicate field number with MWC 3798; collected in 1996 On Pebble bed Easting: 1006.4 Northing: 1011.6
3778	Apatosaurus sp.	Mygatt-Moore Quarry	vertebra, posterial cervical		Dinamation International Society	1994-09-20	vertebra, posterior cervical On pebble bed Easting: 992.45 Northing: 1006.4
3779	Apatosaurus sp.	Mygatt-Moore Quarry	dorsal vertebra	D-1996.2.1	Dinamation International Society	1996-08-19	vertebra, dorsal On pebble bed Easting: 1003.5 Northing: 1010.4
3780	Apatosaurus sp.	Mygatt-Moore Quarry	pubis	DIS 1996.2	Dinamation International Society	1992-10-04	Pubis? No field notes
3787	Diplodocus sp.	Mygatt-Moore Quarry	ungual		Dinamation International Society	1992-08-04	ungual No field notes
3788	Apatosaurus sp.	Mygatt-Moore Quarry	vertebra, cervical		Dinamation International Society	1993-09-28	vertebra, cervical, No field notes
3790	Allosaurus sp.	Mygatt-Moore Quarry	vertebra, dorsal, neural arch		Dinamation International Society		vertebra, dorsal, neural arch No field notes
3791	Apatosaurus sp.	Mygatt-Moore Quarry	ischium??		Dinamation International Society		Ischium?? No field notes
3792	Sauropoda indet.	Mygatt-Moore Quarry	cervical vertebra		Dinamation International Society	1992-08-11	vertebra, cervical
3793	Camarasaurus sp.	Mygatt-Moore Quarry	vertebra, partial centrum		Dinamation International Society		Vertebra, partial centrum No field notes
3794	Allosaurus sp.	Mygatt-Moore Quarry	vertebra, dorsal, anterior	D-1996.2.1	Dinamation International Society	1996-07-15	Vertebra, dorsal, anterior On Pebble bed Easting: 997.8 Northing: 1010.8
3797	Diplodocus sp.	Mygatt-Moore Quarry	vertebra, caudal		Dinamation International Society		vertebra, caudal No field notes
3805	Apatosaurus sp.	Mygatt-Moore Quarry	humerus		Dinamation International Society	1992-08-18	Humerus? No field notes
3806	Allosaurus? sp.	Mygatt-Moore Quarry	bone fragment of ischium?		Dinamation International Society		bone fragment of ischium? No field notes
3807	Allosaurus sp.	Mygatt-Moore Quarry	pubis		Dinamation International Society		pubis No field notes
3808	Camarasaurus sp.	Mygatt-Moore Quarry	vertebra, caudal centrum		Dinamation International Society		vertebra, caudal centrum? No field notes
3809	Allosaurus sp.	Mygatt-Moore Quarry	metatarsal		Dinamation International Society	1993-08-02	metatarsal No field notes
3810	Apatosaurus sp.	Mygatt-Moore Quarry	rib, dorsal		Dinamation International Society		rib, dorsal No field notes
3811	Dinosauria indet.	Mygatt-Moore Quarry	vertebra, dorsal?, transverse process?		Dinamation International Society		vertebra, dorsal?, transverse process? Apatosaurus? No field notes
3812	Allosaurus sp.	Mygatt-Moore Quarry	femur shaft		Dinamation International Society	1993-09-26	femur shaft No field notes
3813	Camarasaurus sp.	Mygatt-Moore Quarry	vertebra, caudal centrum		Dinamation International Society	1992-09-08	vertebra, caudal centrum No field notes
3814	Allosaurus sp.	Mygatt-Moore Quarry	metatarsal		Dinamation International Society	1992-10-03	metatarsal No field notes
3815	Apatosaurus sp.	Mygatt-Moore Quarry	bone frags of limb bone		Dinamation International Society		bone fragment of limb bone No field notes
3816	Apatosaurus sp.	Mygatt-Moore Quarry	bone frag		Dinamation International Society		bone fragment No field notes
3817	Apatosaurus sp.	Mygatt-Moore Quarry	cervical rib		Dinamation International Society		rib, cervical No field notes
3818	Camarasaurus sp.	Mygatt-Moore Quarry	vertebra, caudal? centrum	FIC2009	Dinamation International Society	1994-07-12	vertebra, caudal? centrum Field ID: apatosaur dorsal vert Duplicate field number with MWC 2869 and 3819 On Pebble bed Easting: 994.05 Northing: 1005.35
3819	Allosaurus sp.	Mygatt-Moore Quarry	illium		Dinamation International Society	1994-07-12	illium Field ID: apatosaurus dorsal vert Duplicate field number with MWC 2869 and 3818 On pebble bed Easting: 994.05 Northing: 1005.35
3820	Allosaurus sp.	Mygatt-Moore Quarry	rib shaft		Dinamation International Society	1993-06-08	rib shaft No field notes
3822	Allosaurus sp.	Mygatt-Moore Quarry	vertebra, dorsal, neural arch		Dinamation International Society	1994-07-10	vertebra, dorsal, neural arch Field ID: allosaur prox caudal On Pebble bed Easting: 997.5 Northing: 1009.1 Length: 18cm Width: 5cm
3823	Apatosaurus sp.	Mygatt-Moore Quarry	bone frag of limb bone shaft		Dinamation International Society		bone fragment of limb bone shaft No field notes
3824	Apatosaurus sp.	Mygatt-Moore Quarry	bone frag of limb bone shaft		Dinamation International Society		bone fragment of limb bone shaft No field notes
3825	Sauropoda indet.	Mygatt-Moore Quarry	Sacral rib	D-1996.2.1	Dinamation International Society	1992-07-20	Sacral rib? No field notes 80% complete, On Pebble bed L 19cm, W 14cm 999E, 1005N
3826	Sauropoda indet.	Mygatt-Moore Quarry	vertebra, apophysis?	DIS 1993	Dinamation International Society	1993-07-26	Vertebra, apophysis? fragment only, with artic. No field notes Field notes identify piece as sauropod zygopophysis, or Nodosaurus pubis
3827	Sauropoda indet.	Mygatt-Moore Quarry	vertebra fragment	D-1996.2.1	Dinamation International Society	1993-07-13	Vertebra fragment No field notes Field identification: Camarasaurus vert. 996.2E 1005.4N On Pebble bed
3828	Sauropoda indet.	Mygatt-Moore Quarry	vertebra, cervical, centrum and neural arch	DIS 1993.2	Dinamation International Society	1993-07-05	Vertebra, cervical, centrum and neural arch No field notes per DIS tag: baby Apatosaur cervical vert. on Pebble bed N 1006.6 E 997.0
3830	Allosaurus fragillis	Mygatt-Moore Quarry	caudal vertebra centrum		Dinamation International Society	1994-08-02	caudal vertebra centrum Field ID: apato caudal centrum In Pebble bed Easting: 993.6 Northing: 1006.7 Length: 20cm Field notes: in two blocks
3831	Sauropoda indet.	Mygatt-Moore Quarry	vertebra, zygapophysis	DIS 1991	Dinamation International Society	1991-07-07	Vertebra, zygapophysis No field notes 1005.9 E 999.5 N
3832	Sauropoda indet.	Mygatt-Moore Quarry	vertebra, postzygapophysis	D-1996.2.1	Dinamation International Society	1995-08-14	Vertebra, postzygapophysis, fragment Field ID: allosaur squamosal 30cm above Pebble bed Easting: 993.0 Northing: 1008.3
3833	Allosaurus sp.	Mygatt-Moore Quarry	rib	FIC2009	Dinamation International Society		rib No field notes
3834	Dinosauria indet.	Mygatt-Moore Quarry	Bone fragments	D-1996.2.1	Dinamation International Society	1993-07-13	Bone fragments No field notes
3836	Allosaurus fragilis	Mygatt-Moore Quarry	phalange, 1st manual		Dinamation International Society	1997-02-28	phalange, 1st manual No field notes
3837	Sauropoda indet.	Mygatt-Moore Quarry	Bone fragment	D-1996.2.1	Dinamation International Society	1992-09-08	Bone fragment No field notes
3839	Sauropoda	Mygatt-Moore Quarry	caudal vertebra, midseries centrum w/ basal neural arch	DIS 1996.2	Dinamation International Society	1996-06-24	Vertebra, caudal, midseries centrum w/ basal neural arch Field ID: sauropod centrum On pebble bed Easting: 1002.25 Northing: 1010.2 Length: 14cm
3840	Allosaurus sp.	Mygatt-Moore Quarry	rib		Dinamation International Society		rib No field notes
3841	Allosaurus sp.	Mygatt-Moore Quarry	hyoid?		Dinamation International Society	1994-08-09	hyoid? Field ID: fibula 40cm above Pebble bed Easting: 998.7 Northing: 1009.7 Length: 36cm Field notes: small therapod tooth below fibula
3842	Allosaurus sp.	Mygatt-Moore Quarry	rib	D-1996.2.1	Dinamation International Society	1996-07-09	rib Easting: 1000.85 Northing: 1010.80
3844	Allosaurus sp.	Mygatt-Moore Quarry	gastralia or ossified tendon		Dinamation International Society	1992-08-11	gastralia or ossified tendon No field notes. DIS (prep?) tag says small theropod fibula? hyoid? part only impression from beds "pond 40cm above" Morrison Fm., Brushy Basin Mem. N1009.7 E998.7 8/9/94
3845	Allosaurus sp.	Mygatt-Moore Quarry	skull fragments, right quadrate	D-1995.2.1	Dinamation International Society	1995-08-08	skull fragments, quadrate, right On Pebble bed Easting: 994.05 Northing: 1008.90
3846	Sauropoda indet.	Mygatt-Moore Quarry	vertebra fragment	D-1996.2.1	Dinamation International Society	1996-07-01	Vertebra fragment 20cm above with Pebble bed Easting: 997.85 Northing: 1011.75 Length: 15cm Field notes: 3 pieces
3847	Mymoorapelta maysi	Mygatt-Moore Quarry	chevron	FIC2009	Dinamation International Society	1993-08-23	chevron No field notes
3848	Reptilia indet.	Mygatt-Moore Quarry	bone fragment	DIS 1994.2	Dinamation International Society	1994-08-08	Bone fragment. Process of vertebra? Small humerus? Field ID: humerus frag? 40cm above Pebble layer Easting: 999.2 Northing: 1009.5 Length: 6cm Width: 2.5cm and 1.5cm
3849	Allosaurus sp.	Mygatt-Moore Quarry	metacarpal	D-1996.2.1	Dinamation International Society	1996-07-08	metacarpal III 30cm above Pebble bed Easting: 998.0 Northing: 1012.05
3850	Dinosauria indet.	Mygatt-Moore Quarry	gastralium fragment?	D-1996.2.1	Dinamation International Society	1996-07-01	Gastralium fragment? Field ID: chevron, dinosauria 45cm above Pebble bed Easting: 997.5 Northing: 1012.75
3851	Allosaurus sp.	Mygatt-Moore Quarry	metatarsal		Dinamation International Society	1994-09-20	metatarsal On Pebble bed Easting: 995.7 Northing: 1008.6 Length: 40cm Field notes: in large pieces
3852	Theropoda indet.	Mygatt-Moore Quarry	vertebra, centrum	DIS 1996.2	Dinamation International Society		Vertebra, centrum, crushed No field notes partial completeness width 115 length 90 Coll. date 1996?
3853	Apatosaurus sp.	Mygatt-Moore Quarry	rib, dorsal		Dinamation International Society		rib, dorsal No field notes
3854	Dinosauria indet.	Mygatt-Moore Quarry	bone fragment	DIS 1993.2	Dinamation International Society	1993-09-12	Bone fragment No field notes On Pebble bed
3856	Sauropoda indet.	Mygatt-Moore Quarry	rib fragment	DIS 1996.2	Dinamation International Society	1994-07-19	Rib fragment On Pebble bed Easting: 996 Northing: 1008.7 Length: 18cm Width: 8cm
3857	Allosaurus sp.	Mygatt-Moore Quarry	metatarsal		Dinamation International Society	1993-09-28	metatarsal, broken spiral, and additional fragment No field notes DIS tag: Pebble bed, DIS#141, N1006.4 E996.2, coll. Pete M. 08/02/93
3858	Ceratosaurus sp.	Mygatt-Moore Quarry	vertebra, sacral, centrum, tooth	D-1996.2.1	Dinamation International Society		Vertebra, sacral, centrum, tooth No field notes
3859	Sauropoda indet.	Mygatt-Moore Quarry	bone fragment	DIS 1996.2	Dinamation International Society	1992-07-20	Bone fragment - NID No field notes
3860	Mymoorapelta maysi	Mygatt-Moore Quarry	scute	D-1996.1.1	Museums of Western Colorado		Scute, round with anterior cone No field notes
3861	Sauropoda indet.	Mygatt-Moore Quarry	rib fragment	D-1996.2.1	Dinamation International Society	1996-01-01	Rib fragment No field notes
3862	Sauropoda indet.	Mygatt-Moore Quarry	humerus? long bone shaft	D-1996.2.1	Dinamation International Society		Long bone shaft, humerus? No field notes
3863	Sauropoda indet.	Mygatt-Moore Quarry	vertebra fragment, pneumatic	D-1996.2.1	Dinamation International Society	1992-08-03	Vertebra, fragment, pneumatic, with excellent internal detail No field notes 20cm above pond (?) beds Old ID - Allosaurus neural spine
3864	Allosaurus fragillis	Mygatt-Moore Quarry	caudal vertebra centrum		Museums of Western Colorado	1994-09-13	vertebra, caudal, centrum On pebble bed Easting: 993.1 Northing: 1005.0 Length: 11.5cm Width: 9cm
3865	Allosaurus sp.	Mygatt-Moore Quarry	vertebra, dorsal centrum		Dinamation International Society	1993-09-28	vertebra fragment, dorsal, centrum No field notes 1004.1N 993.1E 40cm above Pebble bed
3866	Allosaurus sp.	Mygatt-Moore Quarry	metatarsal	FIC2009	Dinamation International Society		metatarsal No field notes
3867	Allosaurus sp.	Mygatt-Moore Quarry	Fibula?	D-1996.2.1	Dinamation International Society		Long bone shaft? Fibula? No field notes
3868	Dinosauria indet.	Mygatt-Moore Quarry	bone fragments	DIS 1996.2	Dinamation International Society		Bone fragments No field notes Collected 1996?
3917	Allosaurus fragilis	Mygatt-Moore Quarry	ungual claw	D-1993.2.1	Museums of Western Colorado	1993-09-12	ungual claw, heavily reconstructed No field notes E 995.980 N 1007.360 5cm up from Pebble bed
4010	Allosaurus fragilis	Mygatt-Moore Quarry	cervical vertebra				cervical vertebra, complete, cluster of insect damage present on infra-anterior face of the left prezygopothesis
4011	Apatosaurus excelsus	Mygatt-Moore Quarry	ischium		Dinamation International Society	1996-08-20	Ischium 40 cm above pebble bed Easting: 998.2 Northing: 1011.6
4012	Apatosaurus sp.	Mygatt-Moore Quarry	ischium	D-1997.2.1	Dinamation International Society	1997-10-01	ischium Length: 2m Width: 19cm and 45cm
4013	Unknown	Mygatt-Moore Quarry	vertebra, dorsal		Dinamation International Society		vertebra, dorsal Field ID: apatosaur dorsal vert Duplicate field number with MWC 2869, 3818, 3819 On pebble bed Easting: 994.05 Northing: 1005.35
4014	Apatosaurus sp.	Mygatt-Moore Quarry	ilia	D-1996.2.1	Dinamation International Society	1996-08-19	Ilia Duplicate field number with MWC 5324 40 cm above pebble bed Easting: 996.8 Northing: 1012
4016	Apatosaurus sp.	Mygatt-Moore Quarry	vertebra, anterior caudal		Dinamation International Society		vertebra, anterior caudal No field notes
4017	Allosaurus sp.	Mygatt-Moore Quarry	femur, distal half				Femur, distal 1/2 No field notes
4018	Mymoorapelta maysi	Mygatt-Moore Quarry	scute	D-1997.1.1			Scute No field notes
4019	Mymoorapelta maysi	Mygatt-Moore Quarry	scute, semi lateral				Scute, semi lateral No field notes
4022	Mymoorapelta maysi	Mygatt-Moore Quarry	scute	D-1996.1.1	Museums of Western Colorado	1996-08-15	Scute Field ID: caudal, nodosaur Bottom level of quarry 100% completeness Easting: 985 Northing: 1000 Field notes: has part of TP of 111 and has a scute in hard concretion and matrix. R. Scheetz
4023	Sauropoda indet.	Mygatt-Moore Quarry	squasmosal	D-1997.1.1	Museums of Western Colorado	1997-07-10	Squamosal Field ID: vertebra? process Fair condition Field notes: collected and discovered by Mike Helmer
4024	Apatosaurus sp.	Mygatt-Moore Quarry	vertebra, caudal, distal	D-1997.1.1	Museums of Western Colorado	1997-06-19	Vertebra, caudal, distal Medium quarry level Good condition 75-100% completeness Easting: 982.3 Northing: 1000
4027	Mymoorapelta maysi	Mygatt-Moore Quarry	ischium	D-1997.1.1	Museums of Western Colorado	1997-07-10	Ischium Low quarry level Good condition 75-100% completeness Easting: 990 Northing: 1004 Field notes: px end complete
4029	Mymoorapelta maysi	Mygatt-Moore Quarry	scute	D-1997.1.1	Museums of Western Colorado	1997-07-22	scute Easting: 984 Northing: 1001 Field notes: Warren Stortroen from Sci Mys of Minn group
4030	Mymoorapelta maysi	Mygatt-Moore Quarry	scute	D-1997.1.1	Museums of Western Colorado	1997-07-31	scute Field ID: scute, low spine, mymoorapelta Bottom level of quarry Excellent condition 100% completeness Easting: 984 Northing: 998.7
4031	Mymoorapelta maysi	Mygatt-Moore Quarry	scute	D-1997.1.1	Museums of Western Colorado	1997-08-01	scute Duplicate field number with MWC 4030 Bottom quarry level Excellent condition 100% completeness Easting: 984 Northing: 998.7
4032	Mymoorapelta maysi	Mygatt-Moore Quarry	vertebra. dorsal centrum	D-1997.1.1	Museums of Western Colorado	1997-07-31	vertebra, dorsal centrum Bottom level of quarry Fair condition 50% completeness Easting: 983.5 Northing: 998.7 Field notes: nearly complete centrum w/ pieces of NA near by
4035	Mymoorapelta maysi	Mygatt-Moore Quarry	quadrate, right	D-1998.1.1	Museums of Western Colorado	1998-08-12	quadrate, right Low quarry level (pebble bed) Excellent condition 100% completeness Easting: 985 Northing: 1000
4036	Mymoorapelta maysi	Mygatt-Moore Quarry	caudal vertebra	D-1998.1.1	Museums of Western Colorado	1998-06-30	vertebra, caudal Low quarry level (pebble bed) Excellent condition 75-100% completeness Easting: 986.2 Northing: 1002.25 Field Notes: process rounded, large proximal caudal. face up, spine south
4154	Allosaurus sp.	Mygatt-Moore Quarry	vertebra, zag.		Museums of Western Colorado		vertebra, zag. Specimen has ID sticker with red dot (MMQ), was found in Cab 25 Dr A with MMQ Morrison Jurassic specimens, and PP records Other # as MM..., but PP as updated by Curator 09/21/15 shows Site# 120. 12/19
4163	Allosaurus sp.	Mygatt-Moore Quarry	rib fragment	FIC2009	Dinamation International Society	1992-08-17	rib fragment No field notes
4181	Sauropoda	Mygatt-Moore Quarry	vertebra, caudal	D-1996.1.1	Museums of Western Colorado	1998-06-16	vertebra, caudal Bottom quarry level Good condition 75-100% completeness Easting: 988 Northing: 1002
4182	Sauropoda indet.	Mygatt-Moore Quarry	spine top	D-1998.1.1	Museums of Western Colorado	1998-08-27	spine top Field ID: plant stem? High quarry level, Fair condition Easting: 992 Northing: 1009 Field notes: found in overburden
4184	Sauropoda indet.	Mygatt-Moore Quarry	vertebra, axis	D-1995.1.1	Museums of Western Colorado	1995-06-26	vertebra, axis Field ID: cervical, sauropod Good condition, 90% completeness Easting: 990 Northing: 992 Field notes: vert anterior, some loss
4185	Allosaurus fragillis	Mygatt-Moore Quarry	caudal vertebra centrum	D-1999.6	Museums of Western Colorado	1999-08-18	caudal vertebra centrum Good condition Easting: 992.6 Northing: 1012.60
4186	Sauropoda indet.	Mygatt-Moore Quarry	bone fragment	D-1998.1.1	Museums of Western Colorado	1998-08-27	large bone fragment Field ID: Misc. interesting. ?? Good condition Easting:986 Northing: 1004 Field notes: Too interesting to be bone pebble
4187	Allosaurus sp.	Mygatt-Moore Quarry	ungual	D-1999.6	Museums of Western Colorado	1999-08-05	ungual, missing tip Good condition 50% completeness Field notes: found in education box
4188	Allosaurus sp.	Mygatt-Moore Quarry	large bone fragment	D-1999.6	Museums of Western Colorado	1999-08-17	large bone fragment Field ID: rib, allosaur? Medium quarry level Fair condition Easting: 995 Northing: 1013.35
4189	Allosaurus sp.	Mygatt-Moore Quarry	ungual	D-1997.1.1	Museums of Western Colorado	1997-08-20	Ungual fragment, articular end only Field ID: ungual, articular end only, Allosaurus Fair condition
4190	Allosaurus fragilis	Mygatt-Moore Quarry	ungual	D-1998.1.1	Museums of Western Colorado	1998-08-27	ungual Low quarry level Excellent condition 75-100% completeness Easting: 993 Northing: 1010
4191	Allosaurus sp.	Mygatt-Moore Quarry	distal tibia fragments	D-1999.6	Museums of Western Colorado	1999-08-17	distal tibia fragments Low quarry level Poor condition Easting: 996 Northing: 1013.35
4194	Allosaurus sp.	Mygatt-Moore Quarry	metatarsal shaft	D-1998.1.1	Museums of Western Colorado	1998-06-23	metatarsal shaft Easting: 989 Northing: 1002 Field notes: Allo metatarsal 1/2, broken before burial. End eroded
4195	Apatosaurus sp.	Mygatt-Moore Quarry	vertebra, zygapophysis	FIC2009	Museums of Western Colorado	1998-06-25	vertebra, zygapophysis Field ID: vertebra? cervical Low quarry level, Fair condition, 10% completeness Length: 200mm Width: 150mm Field notes: flat articular face-up. 1002.79N x 987.59E
4196	Mymoorapelta maysi	Mygatt-Moore Quarry	scute	D-1998.1.1	Museums of Western Colorado	1998-08-11	scute Low quarry level (pebble bed) 75-100% completeness Easting: 988 Northing: 1005 Field notes: embedded in limy mudstone
4197	Sauropoda indet.	Mygatt-Moore Quarry	vertebra, part of centrum	D-1998.1.1	Museums of Western Colorado	1998-08-13	vertebra, part of centrum Quarry level low Fair condition, 25% completeness Easting: 987 Northing: 1006 Field notes: 1/2 centrum
4198	Apatosaurus sp.	Mygatt-Moore Quarry	Left cervical rib		Museums of Western Colorado		Left cervical rib 108 Low quarry level Good condition Easting: 985 Northing: 1000 313 Field ID: vertebra, cervical TP Low quarry level Fair condition Easting: 994.5 Northing: 1009.3 Field notes: transverse process and partial cervical rib
4199	Allosaurus sp.	Mygatt-Moore Quarry	vertebra, caudal centrum	D-1999.6	Museums of Western Colorado	1999-06-30	vertebra, caudal centrum Low quarry level Poor/fair condition Easting: 993.8 Northing: 1009.8 Field notes: sheared on top; sunk in bottom clay layer
4216	Apatosaurus sp.	Mygatt-Moore Quarry	rib head w/partial shaft	D-1998.1.1	Museums of Western Colorado	1998-08-06	rib head w/partial shaft Low quarry level Fair condition 25% completeness Easting: 993 Northing: 1010
4217	Sauropoda indet.	Mygatt-Moore Quarry	limb fragment	D-1997.1.1	Museums of Western Colorado	1998-07-10	limb fragment Field ID: long bone, sauropoda Low quarry level, Poor condition 25% completeness Easting: 981 Northing: 1003
4218	Sauropoda indet.	Mygatt-Moore Quarry	bone fragment	D-1999.6	Museums of Western Colorado	1999-07-06	large bone fragment, in two pieces Easting: 993 Northing: 1009.5
4219	Sauropoda indet.	Mygatt-Moore Quarry	vertebral fragment	D-1999.6	Museums of Western Colorado	1999-07-08	vertebral fragment - large Field ID: vertebra, transverse process, apatosaur Fair condition Easting: 995.15 Northing: 1012.4
4220	Allosaurus sp.	Mygatt-Moore Quarry	tibia?	D-1997.1.1	Museums of Western Colorado	1997-08-03	tibia? Good condition 75% completeness Easting: 991.5 Northing: 1009.6 Field Notes: proximal 3/4 of bone w/ clean (although old) break through shaft. Assoc w/ femur 396
4221	Sauropoda indet.	Mygatt-Moore Quarry	vertebra, dorsal centrum	FIC2009			Vertebra, dorsal centrum, partial rim No field notes
4222	Sauropoda indet.	Mygatt-Moore Quarry	chevron	D-1999.6	Museums of Western Colorado	1999-08-18	Chevron Medium quarry level Good condition Easting: 994.3 Northing: 1012.90
4223	Mymoorapelta maysi	Mygatt-Moore Quarry	scute	D-1999.6	Museums of Western Colorado	1999-08-10	scute Field ID: scute and misc vertebra complex, mymoorapelta and sauropod Bottom quarry level Good condition Easting: 990.2 Northing: 1008 Length: 200mm Width: 200mm Field notes: bone complex with nice scute under
4224	Sauropoda indet.	Mygatt-Moore Quarry	limb shaft fragment	D-1999.6	Museums of Western Colorado	1999-07-22	limb shaft fragment, large Low quarry level Poor condition Easting: 995 Northing: 1012.3
4225	Allosaurus sp.	Mygatt-Moore Quarry	humerus shaft	D-1998.1.1	Museums of Western Colorado	1998-08-18	Humerus, shaft--no ends Low quarry level Fair condition Easting: 989 Northing: 1006
4226	Mymoorapelta maysi	Mygatt-Moore Quarry	scute	D-1998.1.1	Museums of Western Colorado	1998-06-16	Scute Field ID: spine or high scute, nodosaur Bottom level of quarry Good condition 75-100% completeness Easting: 986 Northing: 1004 Length: 90mm Height: 45mm
4227	Sauropoda indet.	Mygatt-Moore Quarry	Rib	D-1999.6	Museums of Western Colorado	1999-06-24	Rib section Medium quarry level Fair condition Easting: 993.6 Northing: 1011 Field notes: ends eroded, just partial shaft
4228	Mymoorapelta maysi	Mygatt-Moore Quarry	scute	D-1998.1.1	Museums of Western Colorado	1998-06-22	scute Bottom quarry level Good condition 100% completeness Easting: 987 Northing: 1003 Length: 60mm Width: 60mm
4229	Mymoorapelta maysi	Mygatt-Moore Quarry	scute	D-1998.1.1		1998-07-23	Scute Low quarry level (pebble bed) Good condition 100% completeness Easting: 988 Northing: 1005 Length: 40mm Width: 35mm
4235	Apatosaurus sp.	Mygatt-Moore Quarry	cervical vertebrae		Museums of Western Colorado		vertebra, anterior cervical No field notes
4236	Sauropoda indet.	Mygatt-Moore Quarry	rib	FIC2009			Rib No field notes
4237	Allosaurus fragilis	Mygatt-Moore Quarry	Humerus, distal end	D-1999.6	Museums of Western Colorado	1999-08-04	Humerus, distal end Medium quarry level Good condition 25% completeness Easting: 994.5 Northing: 1012 Field notes: good distal end of humerus
4238	Allosaurus fragilis	Mygatt-Moore Quarry	caudal vertebra	D-1999.6	Museums of Western Colorado	1999-08-03	Vertebra, caudal centrum Low quarry level Good condition 75-100% completeness Easting: 991.6 Northing: 1008.4 Length: 100mm Width: 500mm
4239	Allosaurus fragilis	Mygatt-Moore Quarry	caudal vertebrae	D-1999.6	Museums of Western Colorado	1999-08-03	Vertebra, caudal Field ID: Femur, allosaurus Low quarry level Good condition Easting: 991.5 Northing: 1009.6
4240	Dinosauria indet.	Mygatt-Moore Quarry	bone fragments	D-1996.1.1		1996-08-02	bone fragments, with marks Bottom quarry level Poor condition Easting: 985 Northing: 988
4241	Reptilia indet.	Mygatt-Moore Quarry	possible half centrum		Museums of Western Colorado		half centrum? No field notes
4244	Concretions	Mygatt-Moore Quarry	concretions				Concretions - 4 pieces No field notes Cut to look for 3-D plant material
4245	Allosaurus sp.	Mygatt-Moore Quarry	ulna	D-1999.6	Museums of Western Colorado	1999-08-03	Ulna Field ID: tibia? mymoorapelta Low/medium quarry level, Good condition Easting: 995.25 Northing: 1012.5 Length: 200mm Width: 30mm
4246	Allosaurus sp.	Mygatt-Moore Quarry	vertebra, dorsal centrum	D-1997.1.1	Museums of Western Colorado	1997-08-07	vertebra, dorsal centrum 2' above bst Good condition Easting: 982 Northing: 999 Field notes: eroded edges on anterior dorsal centrum
4247	Allosaurus sp.	Mygatt-Moore Quarry	vertebra, zag.	D-1999.6	Museums of Western Colorado	1999-06-30	Vertebra, zag., fragment Good condition Easting: 992.2 Northing: 1009.3
4248	Allosaurus sp.	Mygatt-Moore Quarry	rib	FIC2009			Rib, in two pieces that fit together but not glued No field notes
4249	Allosaurus sp.	Mygatt-Moore Quarry	rib fragments	FIC2009			rib fragments No field notes
4250	Sauropoda indet.	Mygatt-Moore Quarry	cervical rib				rib, cervical, small, nice!!! No field notes
4252	Allosaurus sp.	Mygatt-Moore Quarry	gastralia? ribs	FIC2009	Dinamation International Society	1996-08-14	Gastralia? Ribs [7 nice frags--4 numbered & measured] Field ID: Allosaurus gastralia Duplicate field number with MWC 3803 5cm above Pebble bed Easting: 1001.1-1001.3 Northing: 1011.65
4259	Allosaurus sp.	Mygatt-Moore Quarry	vertebra, caudal centrum				Vertebra, caudal centrum No field notes
4261	Chelonia indet.	Mygatt-Moore Quarry	shell fragment	D-1997.1.1	Museums of Western Colorado	1997-07-22	Turtle shell fragment Bottom level of quarry Fair condition, 10% completeness Easting: 985 Northing: 1001 Field notes: Dwight Robinson collected from Science Museum of Minnesota
4272	Dinosauria indet.	Mygatt-Moore Quarry	rib fragments	FIC2009	Dinamation International Society	1994-05-25	rib fragments Duplicate field number with MWC 3804 Easting: 994.1 Northing: 1006.9 Length: 18cm Width: 6cm
4273	Dinosauria? indet.	Mygatt-Moore Quarry	rib fragments?	FIC2009			rib fragments? No field notes
4294	Sauropoda indet.	Mygatt-Moore Quarry	rib fragment	D-1995.1.1	Museums of Western Colorado	1995-06-28	rib fragment Good condition 50% completeness Easting: 985 Northing: 992 Notes: long section no ends, easy prep. Extra piece thrown away after prep.
4295	Apatosaurus sp.	Mygatt-Moore Quarry	rib shaft				Rib shaft, flat fragment
4297	Apatosaurus sp.	Mygatt-Moore Quarry	Vertebra, fragment	D-1996.1.1	Museums of Western Colorado	1996-06-20	Vertebra, fragment Duplicate field number with MWC 4296 Field ID: Partial NA? Sauropod? Easting: 988 Northing: 992
4298	Sauropoda indet.	Mygatt-Moore Quarry	chevron	FIC2009		1994-07-21	chevron No field notes
4315	Apatosaurus sp.	Mygatt-Moore Quarry	vertebra frag				Vertebra, fragment No field notes
4319	Apatosaurus sp.	Mygatt-Moore Quarry	Bone fragment	D-1999.6	Museums of Western Colorado	1999-06-16	Bone fragment, in 3 pieces Poor/fair condition Field Notes: interesting thin blade on one side and thick along another
4320	Apatosaurus sp.	Mygatt-Moore Quarry	vertebra, dorsal, base of neural arch	D-1998.1.1	Museums of Western Colorado	1998-08-11	Vertebra, dorsal, base of neural arch Easting: 985 Northing: 1001 Length: 260mm Width: 200mm
4321	Apatosaurus sp.	Mygatt-Moore Quarry	vertebra, zag?	D-1999.6	Museums of Western Colorado	1999-07-01	Vertebra, zag? Field ID: sacral rib?, allosaur? Fair condition Easting: 991 Northing: 1009
4322	Sauropoda indet.	Mygatt-Moore Quarry	chevron	D-1996.1.1	Museums of Western Colorado	1996-08-15	chevron Bottom level of quarry Good condition Easting: 985 Northing: 1001
4325	Allosaurus sp.	Mygatt-Moore Quarry	ungual	D-1999.6	Museums of Western Colorado	1999-07-01	ungual - split thru half High/med quarry level Fair condition Easting: 991 Northing: 1009 Field notes: near 341. large ungual found only part w/ clean breaks. Looked for 1 hr w/out success in rubble pile
4326	Allosaurus sp.	Mygatt-Moore Quarry	vertebra, dorsal, 1/2 centrum	D-1999.6	Museums of Western Colorado	1999-07-01	Vertebra, dorsal, 1/2 centrum Low quarry level Fair/good condition Easting: 995.6 Northing: 1011.2
4327	Apatosaurus sp.	Mygatt-Moore Quarry	cervical rib	D-1998.1.1	Museums of Western Colorado	1998-06-22	Cervical rib, fragment Field ID: vertebra, transverse process, apatosaurus Bottom quarry level, Fair condition, 25% completeness Easting: 987 Northing: 1001 Length: 200mm Width: 90mm
4328	Allosaurus sp.	Mygatt-Moore Quarry	vertebra, dorsal centrum	D-1999.6	Museums of Western Colorado	1999-07-28	Vertebra, dorsal centrum Low quarry level Fair/good condition 75% completeness Easting: 991.25 Northing: 1008.9 Length: 100mm Width: 100mm
4329	Mymoorapelta maysi	Mygatt-Moore Quarry	rib head	FIC2009	Dinamation International Society	1990-09-11	Rib head Low quarry level Poor condition 50% completeness Easting: 989 Northing: 1006 Field notes: eroded
4330	Allosaurus sp.	Mygatt-Moore Quarry	vertebra, caudal centrum	D-1999.6	Museums of Western Colorado	1999-07-26	Vertebra, caudal centrum Low quarry level Good condition Easting: 992.2 Northing: 1008.9 Field notes: in Pebble bed
4331	Allosaurus sp.	Mygatt-Moore Quarry	limb shaft frag	D-1997.1.1	Museums of Western Colorado	1997-07-10	Limb shaft frag Bottom quarry level Poor condition 25% completeness Easting: 984 Northing: 998 Length: 450mm Width: 130mm Field notes: found 15 m W and 2 M S of datum. Lying on distal 1/2 allosaur femur (sketch included)
4332	Apatosaurus sp.	Mygatt-Moore Quarry	sacral rib	D-1999.6	Museums of Western Colorado	1999-07-12	Rib, sacral High/med quarry level Fair condition Easting: 993.3 Northing: 1011.1
4333	Apatosaurus sp.	Mygatt-Moore Quarry	vertebra, caudal, no spine	D-1997.1.1	Museums of Western Colorado	1997-07-22	Vertebra, caudal, no spine Bottom quarry level Easting: 983 Northing: 998 Width: 200mm
4334	Apatosaurus sp.	Mygatt-Moore Quarry	vertebra, caudal, no spine	D-1999.6	Museums of Western Colorado	1999-06-23	Vertebra, caudal, no spine Fair condition Easting: 993.4 Northing: 1011
4335	Apatosaurus sp.	Mygatt-Moore Quarry	rib shaft, missing ends	D-1996.1.1	Museums of Western Colorado	/ /	Rib shaft, missing ends Duplicate field number with MWC 4023 Field ID: vertebra? process, ? Fair condition
4338	Dinosauria indet.	Mygatt-Moore Quarry	shaft of limb bone, radius?	FIC2009	Museums of Western Colorado	1997-07-10	shaft of limb bone - radius? Bottom quarry level, Good condition, 50% completeness Easting: 983 Northing: 1001 Length: 100mm Field notes: 1.5 m N and 17m W
4339	Sauropoda indet.	Mygatt-Moore Quarry	claw	D-1998.1.1	Museums of Western Colorado	1998-05-20	claw Field ID: ungual sauropod Bottom quarry level, Good condition, 75% completeness Easting: 989 Northing: 1004 Length: 80mm Width: 50mm Thick: 30mm
4340	Sauropoda indet.	Mygatt-Moore Quarry	chevron	FIC2009	Museums of Western Colorado	1997-06-19	chevron Medium quarry level, Fair condition 50% completeness Easting: 983 Northing: 1000 Field notes: 16.4m west and 30cm N of datum. Slopes 80 degrees east (near vertical).
4344	Mymoorapelta maysi	Mygatt-Moore Quarry		FIC2009	Dinamation International Society	1994-06-07	"Nodosaur ossicle" On pebble bed Easting: 993.4 Northing: 1005.4 Length: 5cm
4346	Apatosaurus sp.	Mygatt-Moore Quarry	cervical and rib fragments	D-1996.1.1	Museums of Western Colorado	1996-08-15	cervical and rib fragments Field ID: vertebra, cervical Bottom level of quarry, Good condition, 25-50% completeness Easting: 985 Northing: 1000 Field Notes: part of TP in matrix of wrapped pkgs in #112 R. Scheetz
5000	Apatosaurus sp.	Mygatt-Moore Quarry	right astragalus	D-2001.10	Museums of Western Colorado	2001-06-26	right astragalus Medium quarry level Fair condition Easting: 999.5 Northing: 1015.75 Field notes: worn on edges and surface
5001	Apatosaurus sp.	Mygatt-Moore Quarry	mid-caudal vertebra	D-2000.3	Museums of Western Colorado	2000-07-13	mid-caudal vertebra Low quarry level Good condition Easting: 1000.5 Northing: 1014.20
5002	Allosaurus sp.	Mygatt-Moore Quarry	anterior caudal vertebra	D-2000.3	Museums of Western Colorado	2000-06-08	anterior caudal vertebra Duplicate field number with MWC 5001 Field ID: vertebra, caudal, distal, apatosaur Low quarry level Good condition Easting: 1000.5 Northing: 1014.20
5003	Apatosaurus sp.	Mygatt-Moore Quarry	mid-caudal vertebra	D-2000.3	Museums of Western Colorado	2000-06-08	mid-caudal vertebra Field ID: camarasaur caudal Easting: 1005.3 Northing: 1014.45
5004	Apatosaurus sp.	Mygatt-Moore Quarry	distal caudal vertebra			01/01/1004	distal caudal vertebra No field notes
5005	Apatosaurus sp.	Mygatt-Moore Quarry	mid-caudal vertebra	D-2001.10	Museums of Western Colorado	2001-07-03	mid-caudal vertebra High quarry level Good condition Easting: 1003.6 Northing: 1016 Field notes: centrum jacketed, neural spine removed seperately.
5006	Apatosaurus sp.	Mygatt-Moore Quarry	mid-caudal vertebra	D-2001.10	Museums of Western Colorado	2001-08-02	mid-caudal vertebra Low quarry level Good condition Easting: 997.1 Northing: 1015.75 Field notes: small element near it in jacket
5007	Camarasaurus sp.	Mygatt-Moore Quarry	caudal vertebra	D-2001.10	Museums of Western Colorado	2000-08-10	caudal vertebra Low quarry level Good condition Easting: 1004.15 Northing: 1014.25
5008	Allosaurus sp.	Mygatt-Moore Quarry	dorsal vertebra	D-2000.3	Museums of Western Colorado	2000-07-20	dorsal vertebra Good condition Easting: 1004.55 Northing: 1012.9
5009	Camarasaurus sp.	Mygatt-Moore Quarry	right dentary with 3 teeth			/ /	right dentary fragment with 3 teeth, juvenile No field notes
5012	Mymoorapelta maysi	Mygatt-Moore Quarry	mid-caudal vertebrae	D-2001.10	Museums of Western Colorado	2001-07-24	mid-caudal vertebrae Duplicate field number with MWC 5013 Fair condition Easting: 996 Northing: 1014.8 Field notes: caudal rib still in matrix; unintentionally removed before mapping so position is approximate
5013	Mymoorapelta maysi	Mygatt-Moore Quarry	rib fragment	D-2001.10	Museums of Western Colorado	2001-07-24	rib fragment Duplicate field number with MWC 5012 Fair condition Easting: 996 Northing: 1014.8 Field notes: caudal rib still in matrix; unintentionally removed before mapping so positions are approximate
5016	Mymoorapelta maysi	Mygatt-Moore Quarry	small scute	D-1998.1.1	Museums of Western Colorado	1997-07-14	Small scute Excellent condition 100% completeness Easting: 986 Northing: 1003 Length: 55mm Width: 50mm
5017	Diplodocidae	Mygatt-Moore Quarry	shaft of left femur	D-2000.3	Museums of Western Colorado	2000-08-01	shaft of left femur Easting: 1001.9 (to end) Northing: 1014.9 Field notes: End may have been crushed. Oriented N-S
5018	Allosaurus sp.	Mygatt-Moore Quarry	distal half of tibia	D-1999.6	Museums of Western Colorado	1999-08-03	distal half of tibia Low quarry level Good condition 75% completeness Easting: 991.5 Northing: 1009.6 Length: 500mm Width: 200mm Field notes: Proximal 3/4 of bone w/ clean (although old) break through shaft. Assoc. w/ femur 396 (editors note: MWC 4239)
5019	Apatosaurus excelsus	Mygatt-Moore Quarry	anterior caudal vertebra				anterior caudal vertebra No field notes
5020	Apatosaurus sp.	Mygatt-Moore Quarry	cervical vertebra (#4?)				cervical vertebra (#4?) No field notes
5021	Allosaurus sp.	Mygatt-Moore Quarry	dorsal vertebra centrum	D-2000.3	Museums of Western Colorado	2000-08-01	dorsal vertebra centrum Duplicate field number with MWC 5022 Field ID: vertebra centrum, allosaurus Medium quarry level Good condition Easting: 1001.45 Northing: 1015 Field notes: juvenile
5024	Allosaurus sp.	Mygatt-Moore Quarry	caudal centrum	D-2001.10	Museums of Western Colorado	2001-07-19	caudal centrum Low quarry level Good condition Easting: 998.4 Northing: 1015.9
5025	Allosaurus sp.	Mygatt-Moore Quarry	braincase	D-2000.3	Museums of Western Colorado	2000-06-05	braincase Excellent condition Easting: 1002.9 Northing: 1013.20
5026	Allosaurus sp.	Mygatt-Moore Quarry	metatarsal	D-1999.6	Museums of Western Colorado	1999-06-29	metatarsal Low quarry level Good condition Easting: 994.7 Northing: 1010.6
5027	Allosaurus sp.	Mygatt-Moore Quarry	Fibula	D-1996.2.1	Dinamation International Society	1996-07-30	Fibula Duplicate field number with MWC 6727 20 cm above pebble bed Easting: 1000.1 Northing: 1011.6 Length: 20cm Field notes: one end broken
5028	Allosaurus sp.	Mygatt-Moore Quarry	Caudal vertebra	D-2001.10	Museums of Western Colorado	2001-06-12	Caudal vertebra Field ID: mid caudal vert, allosaurus Low quarry level Fair condition Easting: 997.75 Northing: 1014.9 Length: 10cm Width: 4cm
5029	Allosaurus sp.	Mygatt-Moore Quarry	phalanx	D-2000.3	Museums of Western Colorado	2000-07-05	phalanx Low quarry level Good condition Easting: 1002.05 Northing: 1014.25
5030	Allosaurus sp.	Mygatt-Moore Quarry	mid-caudal centrum	D-2001.10	Museums of Western Colorado	2001-06-26	mid-caudal centrum Low quarry level Fair condition Easting: 997.75 Northing: 1015.5
5031	Allosaurus sp.	Mygatt-Moore Quarry	anterior caudal centrum	D-2000.3	Museums of Western Colorado	2000-06-05	anterior caudal centrum Good/excellent condition Easting: 1003.35 Northing: 1014
5032	Allosaurus sp.	Mygatt-Moore Quarry	radius	D-2001.10	Museums of Western Colorado	2001-06-21	radius Low quarry level Good condition Easting: 998.1 Northing: 1015.75 Length: 21cm Width: 3.5cm Field nottes: trend and plunge: 250 degrees, 10 degrees
5033	Allosaurus sp.	Mygatt-Moore Quarry	centrum, vertebra				centrum, vertebra No field notes
5034	Allosaurus sp.	Mygatt-Moore Quarry	large dorsal centrum				large dorsal centrum No field notes
5036	Allosaurus sp.	Mygatt-Moore Quarry	partial vertebral centrum	D-2001.10	Museums of Western Colorado	2001-08-28	partial vertebral centrum Low quarry level Fair condition Easting: 998.2 Northing: 1015.22 Field notes: 1/2 missing. Under 498
5037	Allosaurus sp.	Mygatt-Moore Quarry	distal tibia fragment	D-2001.10	Museums of Western Colorado	2001-07-05	distal tibia fragment Low quarry level Good condition Easting: 1002.2 Northing: 1015 Field notes: distal 15 cm of tibia; pre-burial break is fairly clean
5038	Allosaurus sp.	Mygatt-Moore Quarry	caudal vertebra centrum	D-2001.10	Museums of Western Colorado	2001-08-30	caudal vertebra centrum Low quarry level Fair condition Easting: 999.6 Northing: 1015.9
5039	Allosaurus sp.	Mygatt-Moore Quarry	dorsal vertebra centrum				dorsal vertebra centrum No field notes
5040	Diplodocidae	Mygatt-Moore Quarry	Right asragalus	D-2000.3	Museums of Western Colorado	2000-07-25	Right asragalus Easting: 1004.75 Northing: 1012.95
5041	Apatosaurus sp.	Mygatt-Moore Quarry	caudal vertebra	D-2000.3	Museums of Western Colorado	2000-09-01	caudal vertebra Duplicate field number with MWC 5003 Field ID: camarasaur caudal Easting: 1005.3 Northing: 1014.45
5042	Apatosaurus sp.	Mygatt-Moore Quarry	anterior caudal vertebra	D-2001.10	Museums of Western Colorado	2000-08-15	anterior caudal vertebra Field ID: Large, proximal caudal, apatosaurus Easting: 1004.7 Northing: 1014.5
5044	Apatosaurus sp.	Mygatt-Moore Quarry	right ulna		Museums of Western Colorado	1992-01-01	right ulna No field notes
5045	Apatosaurus sp.	Mygatt-Moore Quarry	right scapula	D-2000.3	Museums of Western Colorado	2001-08-01	right scapula Easting: 1001 Northing: 1015.3
5046	Apatosaurus sp.	Mygatt-Moore Quarry	Cervical vertebra & allosaurus tooth included	D-1999.6	Museums of Western Colorado	1999-07-21	Cervical vertebra & allosaurus tooth included Medium/low quarry level Good condition Easting: 991.55 Northing: 1009.4
5047	Apatosaurus sp.	Mygatt-Moore Quarry	Distal caudal vertebra	D-2001.10	Museums of Western Colorado	2001-07-12	Distal caudal vertebra Duplicate field number with MWC 5914 Fair condition Easting: 1000.15 Northing: 1015.75 Field notes: diplodocid?
5048	Camarasaurus sp.	Mygatt-Moore Quarry	Anterior chevron		Museums of Western Colorado	1990-08-14	Anterior chevron No field notes
5049	Apatosaurus sp.	Mygatt-Moore Quarry	chevron	D-1999.6	Museums of Western Colorado	1999-06-29	chevron Easting: 993.9 Northing: 1011
5050	Apatosaurus sp.	Mygatt-Moore Quarry	anterior chevron	D-2000.3	Museums of Western Colorado	2000-08-10	anterior chevron Low quarry level Good condition Easting: 1005.5 Northing: 1012.7
5051	Camarasaurus sp.	Mygatt-Moore Quarry	L. pubis, juvenile	D-2001.10	Museums of Western Colorado	2001-09-04	L. pubis, juvenile FIeld ID: sauropod, pelvic? element, pubis? Low quarry level, Good condition Easting: 999.0 Northing: 1016.2 Field notes: good condition, but odd shape; no idea what this is yet
5052	Diplodocidae	Mygatt-Moore Quarry	Posterior dorsal				Posterior dorsal No field notes
5053	Allosaurus fragilis	Mygatt-Moore Quarry	phalanx	2004	Museums of Western Colorado	1999-07-12	phalanx Field ID: phalange, allosaur Low quarry level Good condition Easting: 993.35 Northing: 1010.8
5054	Allosaurus sp.	Mygatt-Moore Quarry	caudal centrum				caudal centrum No field notes
5055	Allosaurus fragilis	Mygatt-Moore Quarry	partila dorsal		Museums of Western Colorado	1997-07-28	partial dorsal No field notes
5056	Dinosauria	Mygatt-Moore Quarry	Rib? (head)	D-1999.6	Museums of Western Colorado	1999-07-28	Rib? (head) Duplicate field number with MWC 5057 and 5058 Field ID: limb bone, sauropod Low quarry level Fair condition 75% completeness Easting: 990.8 Northing: 1009.5 Field notes: most shaft
5057	Apatosaurus sp.	Mygatt-Moore Quarry	fragment of cervical rib?	D-1999.6	Museums of Western Colorado	1997-07-28	fragment of cervical rib? Duplicate field number with MWC 5056 and 5058 Field ID: limb bone, sauropod Low quarry level Fair condition 75% completeness Easting: 990.8 Northing: 1009..5
5058	Sauropoda	Mygatt-Moore Quarry	fragment of limb bone	D-1999.6	Museums of Western Colorado	1997-07-28	fragment of limb bone Duplicate field number with MWC 5056 and 5057 Field ID: limb bone, sauropod Low quarry level Fair condition 75% completeness Easting: 990.8 Northing: 1009.5
5060	Camarasaurus sp.	Mygatt-Moore Quarry	partial sacrum & partial Ilia	D-1999.6	Museums of Western Colorado	1998-07-29	partial sacrum & partial Ilia Field ID: pelvis, camarasaur Good condition 100% completeness Easting: 987 Northing: 1004
5061	Mymoorapelta maysi	Mygatt-Moore Quarry	rib head	D-1999.6	Museums of Western Colorado	1998-08-11	rib head Low quarry level Excellent condition 50% completeness Easting: 984 Northing: 1000 Length: 180mm Width: 30mm
5062	Sauropoda indet.	Mygatt-Moore Quarry	phalanx		Museums of Western Colorado	1992-09-22	phalanx Old tag says loc. # 1.05.86 Bottom side found up in area of 3+ metatarsals
5063	Sauropoda	Mygatt-Moore Quarry	cervical rib (process?)	D-2001.10	Museums of Western Colorado	2001-07-03	cervical rib (process?) Low quarry level Easting: 1001.5 Northing: 1015.4
5064	Theropoda indet.	Mygatt-Moore Quarry	caudal centrum fragment	D-2000.3	Museums of Western Colorado	2000-08-17	caudal centrum fragment Low quarry level Poor/fair condition Field notes: 1/2 centrum in pebble layer Found in pebble layer; identified on field log as Allosaur
5067	Sauropoda indet.	Mygatt-Moore Quarry	rib head?	D-1998.1.1	Museums of Western Colorado	1998-06-23	rib head? large, flat, triangular shape Field ID: tooth crown, allosaurus Bottom quarry level, Fair condition 75-100% completeness Easting: 990.5 Northing: 1001.7
5068	Allosaurus fragilis	Mygatt-Moore Quarry	phalanx	D-2001.10	Museums of Western Colorado	2001-07-26	phalanx Low quarry level Fair condition Easting: 997 Northing: 1015.75
5069	Apatosaurus excelsus	Mygatt-Moore Quarry	left cervical rib	D-2000.3	Museums of Western Colorado	2000-07-22	left cervical rib Low quarry level Fair condition Easting: 1000.5 Northing: 1013.85
5070	Mymoorapelta maysi	Mygatt-Moore Quarry	caudal vertebra	D-2000.3	Museums of Western Colorado	1998-08-13	proximal caudal vertebra No field notes
5071	Sauropoda indet.	Mygatt-Moore Quarry	chevron	D-2000.3	Museums of Western Colorado	2000-07-26	chevron High quarry level, Fair/good condition Easting: 1006.35 Northing: 1013.8 Field notes: distal end down at 45 degrees
5072	Apatosaurus sp.	Mygatt-Moore Quarry	Juvenile dorsal centrum	D-2000.3	Museums of Western Colorado	2000-07-27	Juvenile dorsal centrum Low quarry level Good condition Easting: 1004.1 Northing: 1012.5 Field notes: cute baby vert
5073	Sauropoda	Mygatt-Moore Quarry	Sacral neural spine (fused)	D-2001.10	Museums of Western Colorado	2001-08-30	Sacral neural spine (fused) Low quarry level Poor condition Easting: 999.5 Northing: 1015.8
5074	Sauropoda indet.	Mygatt-Moore Quarry	rib fragment	D-2001.10	Museums of Western Colorado	2001-06-21	rib fragment Medium quarry level Fair condition Easting: 999.5 Northing: 1015.6
5075	Allosaurus fragilis	Mygatt-Moore Quarry	caudal vertebra			2001-09-01	caudal vertebra No field notes
5076	Apatosaurus sp.	Mygatt-Moore Quarry	caudal vertebra	D-1999.6	Museums of Western Colorado	1999-08-26	caudal vertebra Medium quarry level Good condition Easting: 995.7 Northing: 1013.40
5077	Camarasaurus sp.	Mygatt-Moore Quarry	caudal vertebra				caudal vertebra No field notes
5078	Apatosaurus sp.	Mygatt-Moore Quarry	mid-caudal centrum				mid-caudal centrum No field notes
5079	Sauropoda	Mygatt-Moore Quarry	rib	D-2001.10	Museums of Western Colorado	2001-07-24	rib Low quarry level Good condition Easting: 1000 Northing: 1016
5080	Sauropoda	Mygatt-Moore Quarry	rib		Museums of Western Colorado	2001-07-24	rib No field notes
5081	Camarasaurus sp.	Mygatt-Moore Quarry	pubis				pubis No field notes
5082	Apatosaurus sp.	Mygatt-Moore Quarry	cervical vertebra	D-2000.3	Museums of Western Colorado	2000-08-08	cervical vertebra Easting: 1007.35 Northing: 1012 Field notes: pair of post cervicals
5083	Apatosaurus sp.	Mygatt-Moore Quarry	dorsal vertebra	D-2001.10	Museums of Western Colorado	2001-06-21	dorsal vertebra Low quarry level Good condition Easting: 1001.25 Northing: 1014.2 Field notes: some bags and pieces associated
5084	Sauropoda indet.	Mygatt-Moore Quarry	anterior cervical vertebra				anterior cervical vertebra No field notes
5085	Apatosaurus sp.	Mygatt-Moore Quarry	chevron	D-2000.3	Museums of Western Colorado	2000-08-17	chevron Low quarry level, Fair condition Easting: 1005.5 Northing: 1012.50 Field notes: perpendicular to nearby 511 (editors note: MWC 5050)
5087	Diplodocidae	Mygatt-Moore Quarry	posterior half of caudal vertebra				posterior half of caudal vertebra No field notes
5088	Sauropoda	Mygatt-Moore Quarry	cervical vertebra			2000-01-01	cervical vertebra (2 pieces) No field notes
5089	Apatosaurus sp.	Mygatt-Moore Quarry	partial cervical vertebra				partial cervical vertebra No field notes
5090	Sauropoda indet.	Mygatt-Moore Quarry	rib fragments	D-2001.10	Museums of Western Colorado	2001-07-05	rib fragments Medium quarry level Poor condition Easting: 999.5 Northing: 1015.6 Field notes: beat-up
5091	Allosaurus fragilis	Mygatt-Moore Quarry	partial dorsal vertebra	D-2000.3	Museums of Western Colorado	2000-08-01	partial dorsal vertebra Duplicate field number with MWC 5021 and 5022 Field ID: vertebra centrum, allosaurus Medium quarry level Good condition Easting: 1001.45 Northing: 1015 Field notes: juvenile
5092	Allosaurus sp.	Mygatt-Moore Quarry	zygapophysis	D-2002.6	Museums of Western Colorado	2002-06-13	zygapophysis Low quarry level Good condition Easting: 995 Northing: 1013.5
5093	Sauropoda indet.	Mygatt-Moore Quarry	neural spine	D-2001.10	Museums of Western Colorado	2001-06-28	neural spine Duplicate field number with MWC 5097 Low quarry level Fair condition Easting: 999.25 Northing: 1015.4
5094	Mymoorapelta maysi	Mygatt-Moore Quarry	rib head	D-1996.2.1	Dinamation International Society	1996-07-30	rib head 10 cm above pebble bed Easting: 1000.45 Northing: 1011.1
5095	Apatosaurus sp.	Mygatt-Moore Quarry	distal chevron fragment	D-2000.3	Museums of Western Colorado	2000-09-10	distal chevron fragment Fair condition Easting: 1003.95 Northing: 1014.05 Field notes: distal keel-like chevron missing one articular side
5096	Allosaurus sp.	Mygatt-Moore Quarry	gastralia	D-1999.6	Museums of Western Colorado	1999-07-08	gastralia Missing one articular side Medium quarry level Fair condition Easting: 991.2 Northing: 1009.5
5097	Sauropoda indet.	Mygatt-Moore Quarry	anterior cervical vertebra fragments	D-2001.10	Museums of Western Colorado	2001-06-28	anterior cervical vertebra fragments Low quarry level Fair condition Easting: 999.25 Northing: 1015.4
5098	Allosaurus fragilis	Mygatt-Moore Quarry	phalanx	D-2002.6	Museums of Western Colorado	2002-08-13	phalanx Low quarry level Excellent condition Easting: 999.1 Northing: 1016.6
5099	Mymoorapelta maysi	Mygatt-Moore Quarry	scute fragment	D-2000.3	Museums of Western Colorado	2000-07-25	scute fragment High quarry level Good condition Easting: 1006.5 Northing: 1013.6
5100	Sauropoda	Mygatt-Moore Quarry	right half of sauropod cervical	D-1995.1.1	Museums of Western Colorado	1995-06-27	right half of sauropod cervical Fair condition Easting: 986 Northing: 993
5102	Allosaurus fragilis	Mygatt-Moore Quarry	pes ungual	D-1999.6	Museums of Western Colorado	1999-07-12	pes ungual Fair condition Easting: 990.7 Northing: 1008.7 Field notes: ends eroded
5103	Allosaurus fragilis	Mygatt-Moore Quarry	phalanx	D-2001.10	Museums of Western Colorado	2001-07-10	phalanx Low quarry level Excellent condition Easting: 998.2 Northing: 1015.75
5104	Mymoorapelta maysi	Mygatt-Moore Quarry	caudal centrum	D-2001.10	Museums of Western Colorado	2001-07-10	caudal centrum Field ID: phalanx, allosaurus Low quarry level Excellent condition Easting: 998.2 Northing: 1015.75
5105	Sauropoda indet.	Mygatt-Moore Quarry	neural spine fragment?	D-2001.10	Museums of Western Colorado	2001-07-04	neural spine fragment? Field ID: dinosauria, vert spine frag? Medium quarry level Poor condition Field notes: NE of 498 (editor' note: MWC 5045)
5106	Sauropoda	Mygatt-Moore Quarry	rib fragment	D-1999.6	Museums of Western Colorado	1999-08-03	rib fragment Good condition Easting: 991.8 Northing: 1009.4 Length: 250mm Width: 50mm Field notes: assoc w/ 395 (MWC 4220 and 5018) and 396 (MWC 4239) allosaur limb
5107	Sauropoda indet.	Mygatt-Moore Quarry	rib fragment	D-2001.10	Museums of Western Colorado	2001-08-30	rib fragment Low quarry level Fair condition Easting: 999.5 Northing: 1015.9
5108	Dinosauria indet.	Mygatt-Moore Quarry	bone fragment	D-2001.10	Museums of Western Colorado	2001-06-14	bone fragment Field ID: Dino, scrap Poor condition Easting: 997.5 Northing: 1015.2 Field notes: worn
5109	Dinosauria indet.	Mygatt-Moore Quarry	bone fragment	D-2001.10	Museums of Western Colorado	2001-06-07	bone fragment Field ID: limb element?, dinosauria Low quarry condition Poor condition
5110	Dinosauria indet.	Mygatt-Moore Quarry	Vertebral fragment?	D-2001.10	Museums of Western Colorado	2001-06-07	Vertebral fragment? Sauropoda? Duplicate field number with MWC 5109 Field ID: limb element?, dinosauria Low quarry level Poor condition
5111	Dinosauria indet.	Mygatt-Moore Quarry	rib head		Dinamation International Society	1991-09-27	rib head Theropoda? No field notes
5112	Dinosauria indet.	Mygatt-Moore Quarry	rib fragment?	D-2001.10	Museums of Western Colorado	2001-07-19	rib fragment? Field ID: Rib?, dinosauria Low quarry level, Poor condition Easting: 998.4 Northing: 1015.9 Field notes: fragment
5113	Dinosauria indet.	Mygatt-Moore Quarry	bone fragment	D-2001.10	Museums of Western Colorado	2001-07-04	bone fragment Low quarry level Poor condition Easting: 995.2 Northing: 1014.7 Field notes: Might be general dino scrap. ID'd in field as possible Mymoorapelta maysi scute.
5114	Sauropoda	Mygatt-Moore Quarry	rib	D-2001.10	Museums of Western Colorado	2001-10-04	rib Low quarry level Easting: 1000.5 Northing: 1016 Field notes: the proximal end of this rib is in the scapula jacket MM522; more in hill
5148	Mymoorapelta maysi	Mygatt-Moore Quarry	spike	D-1997.2.1	Dinamation International Society	1997-07-22	spike . 20 cm above pebble bed Easting: 1002.7 Northing: 1012.9 Length: 8cm Width: 5cm
5167	Apatosaurus sp.	Mygatt-Moore Quarry	cervical vertebra		Dinamation International Society	1998-08-18	cervical vertebra Duplicate field number with MWC 5449 and 5450 Field ID: camarasaurus caudal vertebra (2) On pebble bed Easting: 999.25 Northing: 1012.5
5168	Sauropoda	Mygatt-Moore Quarry	coracoid	D-2002.6	Museums of Western Colorado	2002-06-27	coracoid High quarry level Good condition Easting: 1001 Northing: 1017.7
5169	Sauropoda	Mygatt-Moore Quarry	dorsal neural arch	D-1997.1.1	Museums of Western Colorado	1997-01-01	dorsal neural arch No field notes
5170	Sauropoda	Mygatt-Moore Quarry	?				? No field notes
5172	Sauropoda	Mygatt-Moore Quarry	rib	D-2002.6	Museums of Western Colorado	2002-07-09	rib Low quarry level Good condition Easting: 1004 Northing: 1015.2 Field notes: distal in sections, proximal likely to be jacketed.
5174	Apatosaurus sp.	Mygatt-Moore Quarry	metatarsal 3	D-2002.6	Museums of Western Colorado	2002-08-13	metatarsal 3 Field ID: metatarsal, sauropod High quarry level, Good condition Easting: 1002 Northing: 1018 Field notes: very high
5175	Apatosaurus sp.	Mygatt-Moore Quarry	caudal vertebra #25	D-2002.6	Museums of Western Colorado	2002-08-20	caudal vertebra #25 Low quarry level Good condition Easting: 999.1 Northing: 1016.7
5176	Apatosaurus sp.	Mygatt-Moore Quarry	Neural Spine	D-2002.6	Museums of Western Colorado	2002-08-06	Neural Spine (3 pieces) High quarry level Easting: 1000.6 Northing: 1018.1
5177	Allosaurus sp.	Mygatt-Moore Quarry	vertebra sacral?	D-2000.3	Museums of Western Colorado	2000-08-03	vertebra sacral? Good/excellent condition Easting: 1005.8 Northing: 1013.50 Length: 20cm Width: 20cm Field notes: put in wash tub
5178	Saurischia	Mygatt-Moore Quarry	neural spine	D-2002.6	Museums of Western Colorado	2002-08-15	neural spine Field ID: misc, dinosauria Medium quarry level Fair/good condition Easting: 996.5 Northing: 1017
5179	Diplodocidae indet.	Mygatt-Moore Quarry	rib fagments	D-2002.6	Museums of Western Colorado	2002-08-06	rib fragments Field ID: rib, dinosauria High/medium quarry level Fair condition Easting: 996.5 Northing: 1017
5180	Sauropoda indet.	Mygatt-Moore Quarry	neural spine fragments	D-2002.6	Museums of Western Colorado	2002-06-11	neural spine fragments Field ID: ?, ? Easting: 1003 Northing: 1014
5181	Saurischia indet.	Mygatt-Moore Quarry	metararsal	D-2002.6	Museums of Western Colorado	2002-07-09	metararsal Low quarry level Easting: 1002.5 Northing: 1016.2
5182	Allosaurus sp.	Mygatt-Moore Quarry	caudal centrum	D-2002.6	Museums of Western Colorado	2002-07-18	caudal centrum Low quarry level Good condition Easting: 1004.75 Northing: 1016.3
5183	Sauropoda	Mygatt-Moore Quarry	scapul fragment?	D-2002.6	Museums of Western Colorado	2002-07-02	scapula fragment? Duplicate field number with MWC 5184 Field ID: ?, sauropod Low quarry level Fair condition Easting: 1004.1 Northing: 1014.7 Field notes: in trench next to rib and under it (in two main pieces on map but seem to be same bone)
5184	Sauropoda	Mygatt-Moore Quarry	vertebra fragment	D-2002.6	Museums of Western Colorado	2002-07-02	vertebra fragment Duplicate field number with MWC 5183 Low quarry level Fair condition Easting: 1004.1 Northing: 1014.7 Field notes: in trench next to rib and under it (in two main pieces on map but seem to be same bone)
5188	Sauropoda indet.	Mygatt-Moore Quarry	rib fragment	D-2002.6	Museums of Western Colorado	2002-08-27	rib fragment Field ID: rib fragment, sauropod Low quarry level, Good condition Easting: 1002.7 Northing: 1017.4 Field notes: runs underneath #698, on top of #______ (long rib)
5191	Allosaurus sp.	Mygatt-Moore Quarry	dorsal vertebrae	D-1998.1.1	Museums of Western Colorado	1998-08-05	dorsal vertebrae No field notes
5192	Allosaurus sp.	Mygatt-Moore Quarry	dorsal vertebrae with neural spine	D-1998.1.1	Museums of Western Colorado	1998-07-10	dorsal vertebrae with neural spine No field notes
5193	Allosaurus sp.	Mygatt-Moore Quarry	left squamosal		Museums of Western Colorado		left squamosal No field notes
5196	Camarasaurus sp.	Mygatt-Moore Quarry	dorsal centrum				vertebra - dorsal centrum No field notes
5197	Saurischia indet.	Mygatt-Moore Quarry	?	D-2003.11	Museums of Western Colorado		? No field notes Brook's Jacket, associated with MWC 5196, 5198, 5199, 5192, 5191. "Piece F. Both close to but not articulated with "B" vertebra. One part of compressed process? Other is the left anterior zygapophysis???" - R. Peirce
5198	Saurischia indet.	Mygatt-Moore Quarry	?	D-2003.11	Museums of Western Colorado		? No field notes Brooks Jacket (B1), associated with MWC 5196, 5197, 5199, 5192, 5191.
5199	Saurischia indet.	Mygatt-Moore Quarry	?	D-2003.11	Museums of Western Colorado		? No field notes Brooks Jacket (G1), associated with MWC 5196, 5197, 5198, 5192, 5191.
5200	Mymoorapelta maysi	Mygatt-Moore Quarry	scute		Museums of Western Colorado		scute No field notes
5201	Saurischia indet.	Mygatt-Moore Quarry	bone fragments	D-2003.11	Museums of Western Colorado		? bone fragments No field notes Brooks Jacket, associated with MWC 5196-5199, 5191, 5192.
5202	Saurischia indet.	Mygatt-Moore Quarry	fragment	D-2003.11	Museums of Western Colorado		fragment, vert. - floater No field notes Brooks Jacket, associated with 5196-5203
5203	Saurischia indet.	Mygatt-Moore Quarry	?	D-2003.11	Museums of Western Colorado		? No field notes Brooks Jacket H, associated with MWC 5196-5202.
5204	Saurischia indet.	Mygatt-Moore Quarry	bone fragments	D-2003.11	Museums of Western Colorado		bone fragments, misc. pieces from top of jacket no field notes Brook's Jacket, associated with MWC 5196-5204.
5205	Saurischia indet.	Mygatt-Moore Quarry	rib head	D-2003.11	Museums of Western Colorado		rib head No field notes Brooks Jacket G, associated with MWC 5196-5205.
5206	Saurischia indet.	Mygatt-Moore Quarry	? bone fragment	D-2003.11	Museums of Western Colorado		? bone fragment No field notes Brook's Jacket E, associated with MWC 5196-5205.
5207	Saurischia indet.	Mygatt-Moore Quarry	mid caudal vertebra fragment	D-2002.6	Museums of Western Colorado	2002-08-20	mid caudal vertebra fragment Duplicate field number with MWC 5175; Associated with Apatosaur mid-caudal vert. 5175. Low quarry level Good condition Easting: 999.1 Northing: 1016.7
5208	Sauropoda indet.	Mygatt-Moore Quarry	rib fragment	D-2002.6	Museums of Western Colorado	2002-07-09	rib fragment, triangular in section Field ID: 2 cervical or skull frags? one rib frag, dinosauria Low quarry level, Good condition Easting: 994.6 Northing: 1014.3 Field notes: check 644
5209	Sauropoda indet.	Mygatt-Moore Quarry	? bone fragment	D-2002.6	Museums of Western Colorado	2002-08-20	? bone fragment No field notes
5210	Sauropoda indet.	Mygatt-Moore Quarry	rib fragment?	D-2001.10	Museums of Western Colorado	2001-07-10	Rib fragment? Field ID: rib fragment, dinosauria Low quarry level Poor condition Field notes: two associated frags.
5211	Sauropoda indet.	Mygatt-Moore Quarry	right distal femur	D-2001.10	Museums of Western Colorado	2001-07-12	right distal femur fragment, two pieces Field ID: ?(limb), dinosauria Easting: 1002.8 Northing: 1014.7 Field notes: included fragment maybe not from this bone
5212	Allosauridae indet.	Mygatt-Moore Quarry	caudal centrum	D-2002.6	Museums of Western Colorado	2002-07-30	Caudal centrum Field ID: caudal centrum, theropoda? Low quarry level Fair condition Easting: 999.8 Northing: 1016.4
5215	Camarasaurus sp.	Mygatt-Moore Quarry	occipital condyle & brain case fragment	D-2006.0117	Museums of Western Colorado	2002-07-16	occipital condyle & brain case fragment No field notes
5222	Reptilia	Mygatt-Moore Quarry	bone fragment		Museums of Western Colorado		bone fragment No field notes
5270	Apatosaurus sp.	Mygatt-Moore Quarry	Anterior caudal vertebra	D-2002.6	Museums of Western Colorado	2002-08-06	Anterior caudal vertebra Low quarry level Fair/good condition Easting: 1001.5 Northing: 1017 Field notes: a-neural spine b-centrum
5293	Allosaurus fragilis	Mygatt-Moore Quarry	Caudal centrum	D-2000.3	Museums of Western Colorado	2000-08-24	Caudal centrum Good condition Easting: 1004.25 Northing: 1014.75
5294	Allosaurus fragilis	Mygatt-Moore Quarry	partial vertebra	D-1999.6	Museums of Western Colorado	1999-07-28	Partial vertebra Low quarry level Fair condition Easting: 995.8 Northing: 1012.8 Field notes: flat side down
5295	Theropoda indet.	Mygatt-Moore Quarry	Pedal Phalanx I Digit II				Pedal Phalanx I Digit II No field notes
5297	Allosaurus fragilis	Mygatt-Moore Quarry	right astragalus				right astragalus No field notes
5298	Allosaurus fragilis	Mygatt-Moore Quarry	phalanx				phalanx No field notes
5299	Allosaurus fragilis	Mygatt-Moore Quarry	Pedal phalanx				Pedal phalanx No field notes
5300	Allosaurus fragilis	Mygatt-Moore Quarry	right metatarsal 1				right metatarsal 1 No field notes
5301	Allosaurus fragilis	Mygatt-Moore Quarry	right metacarpal I				right metacarpal I No field notes
5305	Morrolepis schaefferi	Mygatt-Moore Quarry	Posterior half of skeleton	D-2002.6	Museums of Western Colorado	2002-06-01	posterior half of skeleton No field notes
5306	Morrolepis schaefferi	Mygatt-Moore Quarry	Nearly complete skeleton	D-2001.10	Museums of Western Colorado	2001-07-01	nearly complete skeleton No field notes
5307	Morrolepis	Mygatt-Moore Quarry	skull				skull No field notes
5309	Allosaurus sp.	Mygatt-Moore Quarry	left lachrymal	D-2000.3	Museums of Western Colorado	2000-07-22	left lachrymal Field ID: skull bones?? Low quarry level Fair condition Easting: 1001.8 Northing: 1013.65 Field notes: thin interesting bones
5310	Allosaurus sp.	Mygatt-Moore Quarry	manual claw	D-2002.6	Museums of Western Colorado	2002-08-27	manual claw Field ID: ungual, allosaurus Low quarry level Excellent condition Easting: 996.8 Northing: 1016.65 Field notes: tip missing
5311	Allosaurus sp.	Mygatt-Moore Quarry	Right Metatarsal 4	D-1997.2.1	Dinamation International Society	1997-10-01	Right Metatarsal 4 Duplicate field number with MWC 5329 Field ID: allo femur-tibia and top bones On Pebble bed Easting: 1001.4 Northing: 1012.5
5312	Allosaurus sp.	Mygatt-Moore Quarry	Right Metatarsal 2	D-1997.2.1	Dinamation International Society	1997-10-01	Right Metatarsal 2 Duplicate field number with MWC 5329 and 5311 Field ID: allo femur-tibia and top bones On Pebble bed Easting: 1001.4 Northing: 1012.5
5313	Camarasaurus sp.	Mygatt-Moore Quarry	ischium		Dinamation International Society	1993-09-14	ischium Field ID: sauropod rib frag On pebble bed Easting: 997.2 Northing: 997.0 Length: 40cm Width: 10cm
5314	Allosaurus sp.	Mygatt-Moore Quarry	distal caudal vertebra	D-2000.3	Museums of Western Colorado	2000-08-17	distal caudal vertebra Fair condition Easting: 1002.3 Northing: 1014.8 Field notes: very distal caudal missing one end
5315	Dinosauria? indet.	Mygatt-Moore Quarry	fragment of braincase	D-1999.6	Museums of Western Colorado	1999-07-12	braincase, fragment Low quarry level Fair condition Easting: 990.7 Northing: 1008.7 Field notes: ends eroded
5317	Dinosauria indet.	Mygatt-Moore Quarry	metapodial	D-2000.3	Museums of Western Colorado	2000-08-15	metapodial High quarry level Easting: 1005.55 Northing: 1015.4 Field notes: going in high e-w
5318	Allosaurus fragilis	Mygatt-Moore Quarry	astragalus	D-2001.10	Museums of Western Colorado	2000-08-22	astragalus Low quarry level Good condition Easting: 1002.2 Northing: 1014.85 Length: 20cm Width: 15cm
5319	Allosaurus fragilis	Mygatt-Moore Quarry	caudal vertebra fragment	D-2000.3	Museums of Western Colorado	2000-06-27	caudal vertebra fragment Low quarry level Poor/fair condition Easting: 1000.5 Northing: 1013.85 Length: 20cm Width: 18cm
5320	Mymoorapelta maysi	Mygatt-Moore Quarry	scute	D-1999.7	Dinamation International Society	1999-08-04	scute Medium quarry level Good condition 75% completeness Easting: 800 Northing: 1000 Field notes: found around femur, but found in refuse mapped-in but exact location unsure.
5321	Theropoda	Mygatt-Moore Quarry	fragment of caudal vertebra	D-1997.2.1	Dinamation International Society	1997-06-23	fragment of caudal vertebra Field ID: Allosaur vert Easting: 1000.1 Northing: 1012.25 Length: 8cm Width: 10cm
5323	Allosaurus fragilis	Mygatt-Moore Quarry	Phalanx				Phalanx Duplicate field number with MWC 2860 On pebble bed Easting: 995.0 Northing: 1005.3
5324	Allosaurus fragilis	Mygatt-Moore Quarry	Phalanx				Phalanx Duplicate field number with MWC 4014 40 cm above pebble bed Easting: 996.8 Northing: 1012.0
5325	Apatosaurus sp.	Mygatt-Moore Quarry	chevron	D-2000.3	Museums of Western Colorado	2000-08-10	Chevron Easting: 1005.3 Northing: 1012.5 Field notes: perpendicular to chevron 511
5329	Allosaurus fragilis	Mygatt-Moore Quarry	metatarsal	D-1997.2.1	Dinamation International Society	1997-10-01	metatarsal Field ID: Allosaurus femur-tibia and top bones On Pebble bed Easting: 1001.4 Northing: 1012.5
5336	Allosaurus fragilis	Mygatt-Moore Quarry	dorsal centrum	D-2000.3	Museums of Western Colorado	2000-08-10	dorsal centrum Poor condition Easting: 1004.15 Northing: 1014.35 Field notes: centrum
5338	Allosaurus fragilis	Mygatt-Moore Quarry	right humerus	D-2000.3	Museums of Western Colorado	2000-08-29	right humerus Low quarry level Good condition Easting: 1000.5 Northing: 1014.9
5339	Allosaurus fragilis	Mygatt-Moore Quarry	Caudal vertebra				Caudal vertebra No field notes
5340	Allosaurus fragilis	Mygatt-Moore Quarry	Caudal vertebra	D-2000.3	Museums of Western Colorado	2000-08-10	Caudal vertebra Low quarry level Poor condition Easting: 1000.8 Northing: 1015.0 Field notes: eroded centrum
5341	Diplodocus	Mygatt-Moore Quarry	Caudal vertebra	D-2000.3	Museums of Western Colorado	2000-07-20	Caudal vertebra Medium quarry level Poor condition Easting: 1002.70 Northing: 1014.90 Field notes: partial centrum eroded, w/ partial neural arch
5342	Diplodocidae	Mygatt-Moore Quarry	dorsal vertebra	D-2002.6	Museums of Western Colorado	2002-07-25	dorsal vertebra High quarry level Good condition Easting: 997 Northing: 1017 Field notes: sub-adult
5343	Dinosauria indet.	Mygatt-Moore Quarry	bone fragment				bone fragment No field notes Mygatt-Moore?
5344	Allosaurus fragilis	Mygatt-Moore Quarry	phalanx	D-2000.3	Museums of Western Colorado	2000-08-01	Phalanx Duplicate field number with MWC 5045 Field ID: scapula, apatosaurus Easting: 1001 Northing: 1015.3
5345	Dinosauria indet.	Mygatt-Moore Quarry	Skull fragment?	D-2000.3	Museums of Western Colorado	2000-09-02	Skull fragment? Field ID: vert, dorsal, allosaur Easting: 1004.10 Northing: 1013.65 Field notes: centrum
5346	Dinosauria indet.	Mygatt-Moore Quarry	Skull fragment?	D-2002.6	Museums of Western Colorado	2002-06-18	Skull fragment? High quarry level Good condition
5347	Dinosauria indet.	Mygatt-Moore Quarry	Skull fragment?	D-1999.6	Museums of Western Colorado	1999-08-26	Skull fragment? Field ID: misc, possible vert Low quarry level, in 6" (bottom?) Pebble layer Fair condition Easting: 995.45 Northing: 1012.7
5348	Theropoda indet.	Mygatt-Moore Quarry	Caudal centrum	D-2002.6	Museums of Western Colorado	1999-08-26	Caudal centrum Duplicate field number with MWC 5347 Field ID: misc. possible vert Low quarry level Fair condition Easting: 455 Northing: 1270
5349	Allosaurus fragilis	Mygatt-Moore Quarry	dorsal vertebra	D-2002.6	Museums of Western Colorado	2002-06-20	dorsal vertebra Low quarry level Good condition Easting: 998.9 Northing: 1016.5
5350	Allosaurus sp.	Mygatt-Moore Quarry	large tooth		Dinamation International Society	1990-09-11	large tooth No field notes
5352	Dinosauria indet.	Mygatt-Moore Quarry	rib fragment	D-2002.6	Museums of Western Colorado	2002-07-18	rib fragment Low quarry level Poor condition Easting: 994.6 Northing: 1014
5435	Mymoorapelta maysi	Mygatt-Moore Quarry	partial braincase	D-1998.1.1	Museums of Western Colorado	1998-08-27	partial braincase Low quarry level Good condition
5438	Mymoorapelta maysi	Mygatt-Moore Quarry	radius	D-2003.11	Museums of Western Colorado	2003-08-07	radius, left Low quarry level Good/excellent condition Easting: 997.7 Northing: 1018.0
5439	Apatosaurus excelsus	Mygatt-Moore Quarry	left femur, juvenile	D-2003.11	Museums of Western Colorado	2003-08-26	left femur, juvenile Low quarry level, excellent condition Easting: 997.2 Northing: 1018.2 Field notes: juv sauropod or ankylosaur
5440	Allosaurus sp.	Mygatt-Moore Quarry	left dentary, juvenile	D-2003.11	Museums of Western Colorado	2003-06-24	left dentary, juvenile, with unerupted teeth Field ID: jaw fragment, theropoda? Medium quarry level Good condition Easting: 998.8 Northing: 1017.8
5441	Allosaurus sp.	Mygatt-Moore Quarry	right dentary fragment, juvenile	D-2003.11	Museums of Western Colorado	2003-06-23	right dentary fragment, juvenile Field ID: jaw fragment, theropoda Medium/low quarry level Fair/good condition Easting: 998.9 Northing: 1017.6 Field notes: thick jacket top to bottom, maybe extra-thick. WHen flipped a chunk fell out with very very thin bone -> vinaced and replaced sperated from main block with toilet paper, and included in jacket/ Tiny frags in small dark vial go with this piece.…
5443	Crayfish	Mygatt-Moore Quarry	partial skeleton	D-2003.19	Museums of Western Colorado	/ /	partial skeleton No field notes
5444	Reptilia	Mygatt-Moore Quarry	small tooth	D-2003.11	Museums of Western Colorado	2003-08-26	small tooth Field ID: left femur, apatosaurus Duplicate field number with MWC 5439 Low quarry level Excellent condition Easting: 997.2 Northing: 1018.2 Field notes: juv sauropod or ankylosaur
5445	Allosaurus sp.	Mygatt-Moore Quarry	dorsal centrum	D-2003.11	Museums of Western Colorado	2003-08-05	dorsal centrum Low quarry level Good condition Easting: 1004.8 Northing: 1015.9 Field notes: juvenile, another bag of frags from same area has this # too
5446	Apatosaurus sp.	Mygatt-Moore Quarry	metatarsal	D-2003.11	Museums of Western Colorado	2003-06-24	metetarsal Field ID: multiple, dinosauria Fair condition
5447	Allosaurus fragilis	Mygatt-Moore Quarry	caudal vertebra	D-2003.11	Museums of Western Colorado	2003-07-21	caudal vertebra Field ID: caudal centrum, allosaurus Low quarry level Fair condition Easting: 998.2 Northing: 1018 Field notes: more pieces of neural arch still in ground
5448	Allosaurus sp.	Mygatt-Moore Quarry	caudal vertebra	D-1998.8	Dinamation International Society	1998-08-18	caudal vertebra Field ID: allosaurus pelvic bones, ribs, etc. On Pebble bed Easting: 1000.8 Northing: 1012.5
5449	Apatosaurus sp.	Mygatt-Moore Quarry	Cervical? vert fragment	D-1998.8	Dinamation International Society	1998-08-18	Cervical? vert fragment Duplicate field number with MWC 5167 and 5450 Field ID: camarasaur caudal vert (2) On pebble bed Easting: 999.25 Northing: 1012.5
5450	Sauropoda indet.	Mygatt-Moore Quarry	chevron	D-1998.8	Dinamation International Society	1998-08-18	chevron Duplicate field number with MWC 5449 and 5167 Field ID: camarasaurus caudal vertebra (2) On Pebble bed Easting: 999.25 Northing: 1012.5
5451	Allosaurus fragilis	Mygatt-Moore Quarry	radius	D-1997.2.1	Dinamation International Society	1997-06-23	radius 30 cm above Pebble bed Easting: 1002.8 Northing: 1012.9 Length: 25cm
5452	Apatosaurus sp.	Mygatt-Moore Quarry	caudal vertebra	D-2003.11	Museums of Western Colorado	2003-06-23	caudal vertebra Field ID: 2 caudal verts, apatosaurus? Duplicate field number with MWC 5453 Low quarry level Good condition Easting: 997.2 Northing: 1017 Field notes: could be Cam
5453	Apatosaurus sp.	Mygatt-Moore Quarry	caudal vertebra	D-2003.11	Museums of Western Colorado	2003-06-23	caudal vertebra Field ID: 2 caudal verts, apatosaurus? Duplicate field number with MWC 5452 Low quarry level Good condition Easting: 997.2 Northing: 1017 Field notes: could be Cam
5454	Diplodocidae indet.	Mygatt-Moore Quarry	chevron	D-2003.11	Museums of Western Colorado		chevron No field notes
5459	Saurischia indet.	Mygatt-Moore Quarry	vertebral fragment	D-2003.11	Museums of Western Colorado		vertebral fragment No field notes. Invalid field number
5460	Allosaurus sp.	Mygatt-Moore Quarry	Distal fragment of tibia	D-1995.2.1	Dinamation International Society	1995-07-17	Distal fragment of tibia In pebble bed Easting: 993 Northing: 1007 Length: 55cm Width: 45cm Field notes: lateral side up
5467	Diplodocidae indet.	Mygatt-Moore Quarry	mid-caudal chevron	D-2000.3	Museums of Western Colorado	2000-08-24	mid-caudal chevron Low quarry level, Fair condition Easting: 1003.15 Northing: 1014.8 Field notes: distal chevron
5468	Camarasaurus sp.	Mygatt-Moore Quarry	neural spine, caudal?	D-1998.9			neural spine, caudal? No field notes
5469	Sauropoda	Mygatt-Moore Quarry	rib	D-1999.6	Museums of Western Colorado	1999-08-18	rib Low quarry level Good condition Easting: 996 Northing: 1012.9
5470	Allosaurus fragilis	Mygatt-Moore Quarry	manus claw	D-1996.2.1	Dinamation International Society	1997-07-02	manus claw Field ID: mymoorapelta on allo femur 20 cm above pebble bed Easting: 1001.4 Northing: 1012.3
5471	Allosaurus fragilis	Mygatt-Moore Quarry	dorsal neural arch				dorsal neural arch No field notes
5472	Sauropoda	Mygatt-Moore Quarry	rib				rib No field notes
5473	Sauropoda indet.	Mygatt-Moore Quarry	neural spine fragment				neural spine fragment marked in red "N.S." No field notes
5474	Sauropoda indet.	Mygatt-Moore Quarry	neural spine				neural spine fragment No field notes
5477	Reptilia indet.	Mygatt-Moore Quarry	small rib	D-2000.3	Museums of Western Colorado	2000-06-13	small rib Field ID: Sacral rib? sauropod Excellent condition Easting: 1003.85 Northing: 1014.55
5478	Allosaurus sp.	Mygatt-Moore Quarry	cervical vertebra (posterior half)	D-2000.3	Museums of Western Colorado	2000-08-17	cervical vertebra (posterior half) Medium quarry level Poor condition Easting: 1006 Northing: 1013.2
5479	Mymoorapelta maysi	Mygatt-Moore Quarry	dermal scute, distal (caudal?)	D-1992.2.1	Dinamation International Society	1992-09-08	dermal scute, distal (caudal?) No field notes
5480	Allosaurus sp.	Mygatt-Moore Quarry	distal caudal vertebra				distal caudal vertebra No field notes
5481	Diplodocidae	Mygatt-Moore Quarry	dorsal neural spine	D-1995.1.1	Museums of Western Colorado	1995-06-27	dorsal neural spine Notes: field notes ID specimen as allosaurus tooth. Potentially incorrect field number Poor condition 50-75% completeness
5482	Diplodocidae	Mygatt-Moore Quarry	fused sacral neural spine	D-1995.1.1	Museums of Western Colorado	1995-06-27	fused sacral neural spine No field notes
5483	Allosaurus sp.	Mygatt-Moore Quarry	fused sacral neural spines and transverse processes		Museums of Western Colorado		fused sacral neural spines and transverse processes No field notes
5486	Sauropoda	Mygatt-Moore Quarry	rib	D-2003.11	Museums of Western Colorado	2003-08-26	rib Field ID:rib, dinosauria Low quarry level Easting: 999 Northing: 1016
5487	Sauropoda	Mygatt-Moore Quarry	rib fragment	D-2003.11	Museums of Western Colorado	2003-08-11	rib fragment Field ID: dinosauria, ? Low quarry level Excellent condition Easting: 998.1 Northing: 1017.8
5488	Sauropoda	Mygatt-Moore Quarry	rib fragment	D-2003.11	Museums of Western Colorado	2003-07-23	rib fragment Field ID: chevron? rib with pathology?, dinosauria High quarry level Good condition Easting: 1006.4 Northing: 1015.6
5489	Allosaurus fragilis	Mygatt-Moore Quarry	left metacarpal II	D-2003.11	Museums of Western Colorado	2003-07-08	left metacarpal II Field ID: manual phalanx or metacarpal, allosaurus Low quarry level Good condition Easting: 997.25 Northing: 1017.8 Field notes: under 741
5491	Allosaurus sp.	Mygatt-Moore Quarry	pedal phalanx	D-2003.11	Museums of Western Colorado	2003-06-30	pedal phalanx Field ID: pedal phalanx, theropoda Low quarry level Good condition Easting: 998.3 Northing: 1017.6 Field notes: MM 733
5492	Allosaurus sp.	Mygatt-Moore Quarry	caudal vertebra	D-2003.11	Museums of Western Colorado	2003-08-05	caudal vertebra Low quarry level Fair condition Easting: 1004.6 Northing: 1016.2
5518	Apatosaurus sp.	Mygatt-Moore Quarry	rib	D-2004.7	Museums of Western Colorado	2004-08-10	rib Medium quarry level Good condition Easting: 1004 Northing: 1014
5521	Apatosaurus sp.	Mygatt-Moore Quarry	mid caudal vertebra	D-2004.7	Museums of Western Colorado	2004-08-10	mid caudal vertebra Low quarry level Fair condition Easting: 1004 Northing: 1019
5527	Dinosauria? indet.	Mygatt-Moore Quarry	bone fragment	D-2002.6	Museums of Western Colorado	2002-08-20	bone "frag"ment - from juvenile? Low quarry level Excellent condition Easting: 997.8 Northing: 1016.7
5528	Dinosauria? indet.	Mygatt-Moore Quarry	Rib, fragment	D-2003.11	Museums of Western Colorado	2003-06-09	Rib, fragment Low quarry level Excellent condition Easting: 998.7 Northing: 1017.3
5529	Dinosauria? indet.	Mygatt-Moore Quarry	"vert" fragments	D-2003.11	Museums of Western Colorado	2003-06-09	"vert" fragments Low quarry level Excellent condition Easting: 998.7 Northing: 1017.3
5530	Dinosauria? indet.	Mygatt-Moore Quarry	rib	D-2003.11	Museums of Western Colorado	2003-07-08	rib, fragments Low quarry level, Fair condition Easting: 997.8 Northing: 1017.8 Field notes: small bone is in this; under 734
5531	Dinosauria? indet.	Mygatt-Moore Quarry	small bone end		Museums of Western Colorado	1992-09-23	small bone end No field notes in cut wall of S trench by huge cervical vert.
5532	Dinosauria? indet.	Mygatt-Moore Quarry	rib	D-2002.6	Museums of Western Colorado	2002-07-03	rib, fragments Low quarry level Poor condition Easting: 994.7 Northing: 1014
5535	Diplodocidae	Mygatt-Moore Quarry	posterior caudal	D-2004.7	Museums of Western Colorado	2004-07-08	posterior caudal High quarry level Fair condition Easting: 1007 Northing: 1015 Field notes: 3.25 meters from point (~1017N/1004E) due SE, 1 meter above bone bed, 35 degree orientation
5536	Allosaurus sp.	Mygatt-Moore Quarry	rib	D-2000.3	Museums of Western Colorado	2000-07-13	rib fragments in four discontinuous pieces Low quarry level Good condition Easting: 1002.2 Northing: 1014 Length: 270mm
5537	Dinosauria	Mygatt-Moore Quarry	skin impression/paper thin bone	D-2003.11	Museums of Western Colorado	2003-08-07	skin impression/paper thin bone Field ID: paper-thin bone? skin impression?, dinosauria Medium quarry level Fair conditiuon Easting: 998.7 Northing: 1018.2
5538	Dinosauria? indet.	Mygatt-Moore Quarry	caudal vertebra			1980-01-01	caudal vertebra, fragment No field notes
5539	Dinosauria indet.	Mygatt-Moore Quarry	zygapophysis	D-2003.11	Museums of Western Colorado	2003-07-21	vertebral fragment - zygapophysis Sauropoda? High quarry level, Good condition Easting: 1005.1 Northing: 1016.4
5540	Apatosaurus sp.	Mygatt-Moore Quarry	mid caudal vertebra	D-2004.7	Museums of Western Colorado	2004-07-20	mid caudal vertebra Low quarry level Fair condition Easting: 1005 Northing: 1018 Field Notes: 2 meters NE from ~1017N/1003E
5542	Sauropoda indet.	Mygatt-Moore Quarry	sauropod rib, medial end, and associated fragments	D-2003.11	Museums of Western Colorado	2003-06-19	sauropod rib, medial end, and associated fragments No field notes
5543	Dinosauria indet.	Mygatt-Moore Quarry	rib?	D-2003.11	Museums of Western Colorado	2003-07-08	rib? Hgih quarry level Poor condition Easting: 1006.25 Northing: 1013.5
5544	Sauropoda indet.	Mygatt-Moore Quarry	rib	D-2004.7	Museums of Western Colorado	2004-08-17	rib Low quarry level Fair/good condition Easting: 1000 Northing: 1018.5
5545	Saurischia indet.	Mygatt-Moore Quarry	skull or vert. piece	D-2002.6	Museums of Western Colorado	2002-07-09	skull or vert. piece Low quarry level Good condition Easting: Northing: 1013.8 Field notes: hook shaped
5546	Sauropoda? indet.	Mygatt-Moore Quarry	limb or pelvic bone fragment	D-2003.11	Museums of Western Colorado	2003-06-10	Fragment of limb or pelvic bone Field ID: large fragment-> limb?, vertebrata Low quarry level Fair condition Easting: 1000.4 Northing: 1017.3
5547	Reptilia indet.	Mygatt-Moore Quarry	Rib? fragment	D-2001.10	Museums of Western Colorado	2001-07-03	Rib? fragment Field ID: rib? fragment, dinosauria High quarry level Poor condition Field notes: above 572 in wall
5548	Sauropoda indet.	Mygatt-Moore Quarry	rib, medial portion	D-2004.7	Museums of Western Colorado	2004-08-17	rib, medial portion Low quarry level
5549	Dinosauria indet.	Mygatt-Moore Quarry	bone fragments	D-2003.11	Museums of Western Colorado	2003-07-30	bone fragments Low quarry level Easting: 1003.6 Northing: 1017.6 Field notes: Pebble layer
5550	Sauropoda indet.	Mygatt-Moore Quarry	rib fragment	D-2003.11	Museums of Western Colorado	2003-06-09	rib fragment Good condition Easting: 1004.1 Northing: 1017.4
5551	Sauropoda indet.	Mygatt-Moore Quarry	rib fragment	D-2001.10	Museums of Western Colorado	2001-01-01	rib fragment Field ID: rib (and others), dinosauria Low quarry level, Fair condition Easting: 1000.2 Northing: 1016 Field notes: more in hill
5552	Dinosauria indet.	Mygatt-Moore Quarry	vertebral centrum?	D-2003.11	Museums of Western Colorado	1998-07-14	vertebral centrum? Duplicate field number with MWC 6785 Low quarry level, Good condition, 75% completeness Easting: 987 Northing: 1002 Field notes: corner gone, found in refuse from broad area 987 E 1002N, not mapped
5553	Dinosauria indet.	Mygatt-Moore Quarry	"zygapophysis?"	D-2001.10	Museums of Western Colorado	2001-07-05	"zygapophysis?" Field ID: ?phalanx, dinosauria Low quarry level Fair condition Field notes: from near 498; NE of it
5554	Allosaurus sp.	Mygatt-Moore Quarry	vertebral, caudal neural spine	D-1998.9	Dinamation International Society	1998-08-11	vertebral, caudal neural spine Field ID: flat bone - weird bone, scapula??? chevron??? On Pebble bed Easting: 1000.20 Northing: 1013
5557	Dinosauria indet.	Mygatt-Moore Quarry	rib fragment	D-2002.6	Museums of Western Colorado	2002-07-09	rib fragment Field ID: rib?, dinosauria High quarry level, Fair condition Easting: 998.3 Northing: 1017.6 Field notes: very high in wall
5558	Sauropoda indet.	Mygatt-Moore Quarry	rib fragment	D-2002.6	Museums of Western Colorado	2000-06-22	rib fragment Fair condition Easting: 1005.2 Northing: 1015 Field notes: triangular bone, fairly thin, maybe poart of very large rib head?
5559	Dinosauria indet.	Mygatt-Moore Quarry	rib fragment		Museums of Western Colorado	1990-07-25	rib fragment No field notes
5560	Dinosauria indet.	Mygatt-Moore Quarry	skull fragment?	D-2003.11	Museums of Western Colorado	2003-08-26	skull fragment? Field ID: vert frag? skull frag?, dinosauria High quarry level Fair/good condition Easting: 1006.0 Northing: 1013.0
5561	Sauropoda indet.	Mygatt-Moore Quarry	bone fragment - rib?	D-2002.6	Museums of Western Colorado	2002-01-01	bone fragment - rib? Field ID: a-rounded chunk b-rib chunk c-rounded chunk d-rounded chunk e-rounded chunk f-rounded chunk, dinosauria Low quarry level, Poor condition Easting: 1003.8 Northing: 1015.5 Field notes: near/under rib parts A-F
5562	Sauropoda indet.	Mygatt-Moore Quarry	rib	D-1999.6	Museums of Western Colorado	1999-01-01	rib fragment Field ID: limb frag, sauropod "near/under rib" Easting: 991.5 Northing: 1008.6
5564	Hulettia hawesi	Mygatt-Moore Quarry	skeleton except head	D-2004.7	Museums of Western Colorado	2004-06-15	skeleton without head Good condition
5565	Actinopterygii	Mygatt-Moore Quarry	2 fins	D-2004.7	Museums of Western Colorado	2004-06-15	2 fins Fair condition Field notes: fish layer
5566	Crayfish	Mygatt-Moore Quarry	fragment	D-2003.11	Museums of Western Colorado	2004-06-15	fragment Fair condition Field notes: fish layer
5567	"fish"	Mygatt-Moore Quarry	fragment	D-2004.7	Museums of Western Colorado	2003-07-28	fragment no field notes
5569	Diplodocus	Mygatt-Moore Quarry	anterior caudal vertebra	D-2003.11	Museums of Western Colorado	2003-08-11	anterior caudal vertebra Duplicate field number with 5571 Medium quarry level Fair/good condition Easting: 1005.9 Northing: 1016.1
5571	Theropoda indet.	Mygatt-Moore Quarry	prezygapophysis	D-2003.11	Museums of Western Colorado	2003-08-11	prezygapophysis Duplicate field number with 5569 Medium quarry level Fair/good condition Easting: 1005.9 Northing: 1016.1
5572	Allosaurus? sp.	Mygatt-Moore Quarry	cervical vertebra fragments	D-2003.11	Museums of Western Colorado	2003-07-24	cervical vertebra fragments Field ID: Skull fragments?, dinosauria? Low quarry level Good condition Easting: 998.3 Northing: 1017.5 Field notes: lots of small pnuematic openings, split when found.
5635	Hulettia hawesi	Mygatt-Moore Quarry	front half of skeleton	D-2005.6	Museums of Western Colorado	2005-03-04	skeleton No field notes
5641	Mymoorapelta maysi	Mygatt-Moore Quarry	posterior cervical vertebra	D-2005.6	Museums of Western Colorado		posterior cervical vertebra No field notes
5642	Mymoorapelta maysi	Mygatt-Moore Quarry	lateral spine	D-2000.3	Museums of Western Colorado	2000-06-20	lateral spine Field ID: spike, mymoorapelta Low quarry level Excellent condition Easting: 1002.22 Northing: 1013.59 Length: 23cm Width: 14cm
5643	Mymoorapelta maysi	Mygatt-Moore Quarry	left ulna	D-1999.6	Museums of Western Colorado	1999-08-12	left ulna Medium quarry level Excellent condition Easting: 997 Northing: 1013.5
5644	Allosaurus sp.	Mygatt-Moore Quarry	fibula	D-2005.6	Museums of Western Colorado	2005-06-30	fibula High quarry level Good condition Easting: 995.2-995.8 Northing: 979.3
5645	Diplodocidae	Mygatt-Moore Quarry	astragalus, right	D-2005.6	Museums of Western Colorado	2005-07-06	astragalus, right High quarry level Good condition Easting: 994.5 Northing: 979.5
5646	Allosaurus sp.	Mygatt-Moore Quarry	Neural arch and spines with transverse processes (from dorsal vert. of juvenile)	D-2005.6	Museums of Western Colorado	2005-07-01	Neural arch and spines with transverse processes (from dorsal vert. of juvenile) Field ID: vert, allosaurus High quarry level Good condition Easting: 995.6 Northing: 979.2
5647	Apatosaurus sp.	Mygatt-Moore Quarry	Caudal vertebra	D-2005.6	Museums of Western Colorado	2005-06-24	Caudal vertebra Field ID: caudal vert, dinosauria High quarry level Good condition Easting: 995.8 Northing: 979.4
5648	Apatosaurus sp.	Mygatt-Moore Quarry	radius	D-2005.6	Museums of Western Colorado	2005-06-29	radius Low quarry level Good/excellent condition Easting: 995 Northing: 981
5649	Allosaurus sp.	Mygatt-Moore Quarry	cervical rib	D-2005.6	Museums of Western Colorado	2005-06-16	cervical rib, in fragments Field ID: vertebral frag?, dinosauria Poor/fair condition Easting: 995.2 Northing: 979.25
5650	Allosaurus sp.	Mygatt-Moore Quarry	cervical vertebral fragments	D-2005.6	Museums of Western Colorado	2005-06-10	cervical vertebral fragments Field ID: caudal, dinosauria Easting: 995 Northing: 981 Field notes: smashed
5651	Sauropoda indet.	Mygatt-Moore Quarry	rib fragment	D-2005.6	Museums of Western Colorado	2005-06-24	rib fragment Low quarry level Fair condition Easting: 997.8 Northing: 979.4
5652	Allosaurus sp.	Mygatt-Moore Quarry	tibia, left	D-2005.6	Museums of Western Colorado	2005-07-06	tibia, left High quarry level Excellent condition
5653	Apatosaurus sp.	Mygatt-Moore Quarry	caudal vert.	D-2005.6	Museums of Western Colorado	2005-07-05	caudal vert. High quarry level Good condition Easting: 997.5 Northing: 977.5
5654	Sauropoda	Mygatt-Moore Quarry	caudal vert.	D-2005.6	Museums of Western Colorado	2005-06-24	caudal vert. Duplicate field number with MWC 5655 Low quarry level Excellent condition Easting: 996.6 Northing: 979.4
5655	Dinosauria indet.	Mygatt-Moore Quarry	bone fragment	D-2005.6	Museums of Western Colorado	2005-06-24	bone fragment Duplicate field number with MWC 5654 Field ID: caudal vert, sauropod Low quarry level, Excellent condition Easting: 996.6 Northing: 979.4
5656	Sauropoda indet.	Mygatt-Moore Quarry	rib fragment	D-2005.6	Museums of Western Colorado	2004-08-17	rib fragment Duplicate field number with MWC 5544 Low quarry level, Fair/good condition Easting: 1000 Northing: 1018.5
5657	Dinosauria indet.	Mygatt-Moore Quarry	bone fragment	D-2005.6	Museums of Western Colorado	2005-06-29	"assorted bone scrap" including 1 big chunk High quarry level Fair condition Easting: 998-999 Northing: 979-980
5658	Allosaurus sp.	Mygatt-Moore Quarry	rib	D-2005.6	Museums of Western Colorado	2005-10-26	rib No field notes
5659	Apatosaurus excelsus	Mygatt-Moore Quarry	cervical rib	D-2005.6	Museums of Western Colorado	/ /	cervical rib No field notes
5660	Apatosaurus sp.	Mygatt-Moore Quarry	caudal	D-2005.6	Museums of Western Colorado	2004-08-19	caudal Field ID: cervical, apatosaurus Low quarry level Good condition Easting: 998 Northing: 1018.5
5661	Sauropoda indet.	Mygatt-Moore Quarry	rib portion	D-2004.7	Museums of Western Colorado	2004-07-01	rib, portion Field ID: ?, ?bone Medium quarry level Good condition Easting: 1000 Northing: 1017
5662	Sauropoda indet.	Mygatt-Moore Quarry	rib fragment	D-2004.7	Museums of Western Colorado	2004-08-17	rib fragment Low quarry level Poor/fair condition Easting: 999.5 Northing: 1018.5
5663	Dinosauria indet.	Mygatt-Moore Quarry	rib fragments	D-2004.7	Museums of Western Colorado	2004-08-18	rib fragments Duplicate field number with MWC 5548 Low quarry level
5664	Dinosauria indet.	Mygatt-Moore Quarry	rib fragments	D-2004.7	Museums of Western Colorado	2004-08-11	rib head and tubercle, fragment + 2 tidbits Field ID: rib, dinosauria Low quarry level Good condition Easting: 1000 Northing: 1018
5665	Dinosauria indet.	Mygatt-Moore Quarry	rib fragments	D-2005.6	Museums of Western Colorado	2005-07-14	rib fragments Easting: 993.8 Northing: 980.4
5666	Dinosauria indet.	Mygatt-Moore Quarry	bone fragments	D-2005.6	Museums of Western Colorado	2005-06-23	bone fragments ("vert. lamina?") Field ID: bone frag, dinosauria Low quarry level Fair condition Easting: 997.2 Northing: 979.3
5668	Apatosaurus sp.	Mygatt-Moore Quarry	caudal vertebra (3/4 of a centrum)	D-2005.6	Museums of Western Colorado	2002-08-20	caudal vertebra (3/4 of a centrum) Field ID: caudal centrum, sauropoda Low quarry level Poor/fair condition Easting: 999.7 Northing: 1016.2
5671	Sauropoda indet.	Mygatt-Moore Quarry	ungual, juvenile	D-2005.6	Museums of Western Colorado	2005-07-29	ungual, juvenile - sticky note in tray says hind (L) Field ID: claw core?, dinosauria High quarry level Good condition Easting: 996.3 Northing: 976.6
5672	Apatosaurus sp.	Mygatt-Moore Quarry	caudal verterbra	D-2005.6	Museums of Western Colorado	2005-07-08	caudal verterbra High quarry level Good condition Easting: 996.7 Northing: 977.3
5674	Sauropoda	Mygatt-Moore Quarry	rib	D-2005.6	Museums of Western Colorado	2003-07-10	rib High quarry level Poor condition Easting: 1006.5 Northing: 1016
5675	Sauropoda	Mygatt-Moore Quarry	distal femur fragment	D-2005.6	Museums of Western Colorado	2005-07-29	distal femur fragment Duplicate field number with MWC 7269 Field ID: Assorted bone, dinosauria Low quarry level Good condition
5676	Dinosauria indet.	Mygatt-Moore Quarry	rib fragment	D-2005.6	Museums of Western Colorado	2005-07-05	rib fragment High quarry level Fair condition Easting: 995.5 Northing: 979
5677	Sauropoda indet.	Mygatt-Moore Quarry	metatarsal	D-2005.6	Museums of Western Colorado	2005-07-14	metatarsal Field ID: caudal vert, dinosauria High quarry level Good condition
5678	Sauropoda indet.	Mygatt-Moore Quarry	chevron	D-2005.6	Museums of Western Colorado	2003-07-23	chevron? fragment Diplodocidae? Field ID: chevron? cervical rib with pathology? (noted on field bag), dinosauria High quarry level Good condition Easting: 1004.8 Northing: 1015.9
5679	Sauropoda indet.	Mygatt-Moore Quarry	rib fragments	D-2005.6	Museums of Western Colorado	2003-07-29	rib fragments Field ID: rib fragment, dinosauria->sauropoda? Low quarry level Fair condition Easting: 1003.4 Northing: 1016.7
5680	Dinosauria indet.	Mygatt-Moore Quarry	rib fragments	D-2005.6	Museums of Western Colorado	2005-06-01	rib fragments Field ID: rib and associated frags Allosaurus?
5685	Sauropoda	Mygatt-Moore Quarry	dorsal centrum	D-2005.6	Museums of Western Colorado	2005-07-22	dorsal centrum no field notes
5688	Saurischia	Mygatt-Moore Quarry	femur? fragment	D-2005.6	Museums of Western Colorado	2005-06-29	femur? fragment Field ID: bone, dinosauria High quarry level Fair condition Easting: 998 Northing: 979.5
5692	Sauropoda	Mygatt-Moore Quarry	limb? fragment, very large	D-2005.6	Museums of Western Colorado	/ /	limb? fragment, very large On pebble bed Easting: 997.4 Northing: 1006 Three sides: 13cm, 10cm, and 11cm
5693	Sauropoda	Mygatt-Moore Quarry	limb? fragment, very large	D-2005.6	Museums of Western Colorado	/ /	limb? fragment, very large No field notes
5694	Apatosaurus sp.	Mygatt-Moore Quarry	complete right humerus	D-2005.6	Museums of Western Colorado	2005-08-19	humerus High quarry level Excellent condition Easting: 999 Northing: 976 Field notes: Cool. in sections
5698	Apatosaurus sp.	Mygatt-Moore Quarry	cervical rib fragments	D-2005.6	Museums of Western Colorado	2002-08-27	cervical rib fragments Field ID: vertebral fragment?, dinosauria Low quarry level, Fair condition Easting: 1002.7 Northing: 1017.4 Field notes: drawn on map after removed from ground, so map figure may display distortion
5699	Allosaurus sp.	Mygatt-Moore Quarry	caudal vertebra	D-2005.6	Museums of Western Colorado	/ /	caudal vertebra no field notes
5700	Allosaurus sp.	Mygatt-Moore Quarry	left tibia, proximal fragment	D-2005.6	Museums of Western Colorado	/ /	left tibia, proximal fragment No field notes
5701	Actinopterygii	Mygatt-Moore Quarry	fin	D-2005.6	Museums of Western Colorado	2000-07-08	fin Good condition Field notes: from debris of fish layer
5702	Sauropoda indet.	Mygatt-Moore Quarry	claw	D-2005.6	Museums of Western Colorado	2004-06-25	claw Field ID: ungual, sauropoda Medium quarry level Fair/good condition Easting: 1005.2 Northing: 1018.2
5703	Allosaurus sp.	Mygatt-Moore Quarry	rib	D-2005.6	Museums of Western Colorado	2005-07-05	rib Field ID: rib, dinosauria High quarry level Good condition Easting: 999.8 Northing: 979
5705	Mymoorapelta maysi	Mygatt-Moore Quarry	dorsal vertebra	D-2005.6	Museums of Western Colorado	2005-08-26	dorsal vertebra Low quarry level Fair/good condition Field notes: pebble layer
5707	Theropoda indet.	Mygatt-Moore Quarry	phalanx	D-2005.6	Museums of Western Colorado	2003-06-24	phalanx High quarry level Fair condition Easting: 1005.6 Northing: 1013.15 Field notes: found while shovelling overburden, location approximated
5708	Apatosaurus sp.	Mygatt-Moore Quarry	tibia, proximal 1/2	D-2005.6	Museums of Western Colorado	2005-07-13	tibia, proximal 1/2 Field ID: prox. 1/2 fibula, apatosaurus? Medium/low quarry level Good condition Easting: 995.8 Northing: 977.5
5710	Apatosaurus sp.	Mygatt-Moore Quarry	caudal vertebra	D-2005.6	Museums of Western Colorado	/ /	caudal vertebra No field notes
5711	Sauropoda indet.	Mygatt-Moore Quarry	chevron	D-2005.6	Museums of Western Colorado	2003-07-22	chevron Low quarry Good condition Easting: 1005.3 Northing: 1015.4
5712	Sauropoda indet.	Mygatt-Moore Quarry	rib fragment	D-2005.6	Museums of Western Colorado	2003-08-05	rib fragment Low quarry level Good condition Easting: 1002.9 Northing: 1018.3 Field notes: continues under sacrum
5714	Sauropoda	Mygatt-Moore Quarry	rib fragment	D-2005.6	Museums of Western Colorado	2003-08-19	rib fragment Low quarry level Fair/good condition Easting: 1001.8 Northing: 1017.9 Field notes: under sacrum
5715	Allosaurus sp.	Mygatt-Moore Quarry	caudal vertebra	D-2005.6	Museums of Western Colorado	2003-07-17	caudal vertebra Field ID: phalanx? Maybe fragment, sauropoda? Low quarry level Good condition Easting: 1000.6 Northing: 1018
5718	Dinosauria indet.	Mygatt-Moore Quarry	skull pieces		Museums of Western Colorado	1990-08-07	skull pieces No field notes "From near MMSF 8-7-90-1"
5720	Mymoorapelta maysi	Mygatt-Moore Quarry	rib fragment	D-2005.6	Museums of Western Colorado	2003-06-30	rib fragment Low quarry level Poor/fair condition Easting: 1000.3 Northing: 1017.8 Field notes: *not on map
5721	Sauropoda indet.	Mygatt-Moore Quarry	metatarsal, 1/2	D-2005.6	Museums of Western Colorado	2003-08-07	metatarsal, 1/2 Field ID: metapodial?, sauropoda? Fair condition Easting: 1000.5 Northing: 1018.5 Field notes: 1/2 missing
5722	Allosaurus sp.	Mygatt-Moore Quarry	carpal	D-2005	Museums of Western Colorado	2003-06-30	carpal Field ID: manus phalanx?, allosaurus? Low quarry level Good condition Easting: 997.6 Northing: 1017.9 Field notes: MC?
5723	Apatosaurus sp.	Mygatt-Moore Quarry	cervical rib? fragment	D-2005.6	Museums of Western Colorado	2002-07-24	cervical rib? fragment Field ID: ?, ? Good condition Easting: 995.0 Northing: 1013.6 Field notes: fits should be good, except some frags
5724	Apatosaurus sp.	Mygatt-Moore Quarry	caudal vertebra, centrum	D-2005.6	Museums of Western Colorado	2003-08-12	caudal vertebra, centrum Low quarry level Fair condition Easting: 1005.3 Northing: 1016.1 "Apatosaurus, caudal centrum #802."
5725	Apatosaurus excelsus	Mygatt-Moore Quarry	cervical vertebra	D-2005.6	Museums of Western Colorado	2004-08-19	cervical vertebra Duplicate field number with MWC 5660 Low quarry level Good condition Easting: 998 Northing: 1018.5 Field notes: vert frags->DNC cervical->?
5728	Pterosauria indet.	Mygatt-Moore Quarry	wing bone fragment	D-2005.6	Museums of Western Colorado	2004-01-01	wing bone fragment Field ID: hollow frag (wing?), pterosauria Poor/fair condition Field notes: found by Lorin while prepping
5817	Allosaurus fragillis	Mygatt-Moore Quarry	caudal vertebra	D-1997.2.1	Dinamation International Society	1997-09-29	caudal vertebra 20 cm above pebble bed Easting: 1001.4 Northing: 1013 Length: 25cm Width: 20cm
5818	Allosaurus fragillis	Mygatt-Moore Quarry	cervical vertebra				cervical vertebra No field notes
5819	Mymoorapelta maysi	Mygatt-Moore Quarry	caudal vertebrae (2) and chevrons				2 caudal vertebrae and chevrons No field notes
5820	Mymoorapelta maysi	Mygatt-Moore Quarry	2 partial caudal vertebrae				2 partial caudal vertebrae No field notes
5821	Allosaurus sp.	Mygatt-Moore Quarry	caudal centrum	D-1997.2.1	Dinamation International Society	1997-06-23	caudal centrum 10 cm above pebble bed Easting: 996.8 Northing: 1012.3
5829	Apatosaurus sp.	Mygatt-Moore Quarry	dorsal vertebra				dorsal vertebra No field notes
5830	Mymoorapelta maysi	Mygatt-Moore Quarry	mid-caudal vertebra	D-2006.0117	Museums of Western Colorado		mid-caudal vertebra no field notes
5831	Allosaurus sp.	Mygatt-Moore Quarry	metacarpal, 2nd right	D-2006.0117	Museums of Western Colorado	2006-07-07	metacarpal, 2nd right Field ID: tooth, theropod (cerato) High quarry level Good condition Easting: 1001.1 Northing: 1019.8
5838	Mymoorapelta maysi	Mygatt-Moore Quarry	scute	D-2006.0117	Museums of Western Colorado	2006-06-15	scute High quarry level Good condition Easting: 996 Northing: 1018
5841	Saurischia indet.	Mygatt-Moore Quarry	neural spine (partial)	D-2006.0117	Museums of Western Colorado	2006-06-06	vertebra fragment: neural spine (partial) Low quarry level Easting: 998 Northing: 1018
5842	Diplodocidae indet.	Mygatt-Moore Quarry	chevron	D-2006.0117	Museums of Western Colorado	2006-06-07	Chevron Field ID: ?, Dinosauria High quarry level Good condition Easting: 1005.8 Northing: 1014.5
5893	Dinosauria indet.	Mygatt-Moore Quarry	chevron	D-2006.0117	Museums of Western Colorado	2006-06-07	chevron Medium quarry level Good condition
5894	Mymoorapelta maysi	Mygatt-Moore Quarry	scute	D-2006.0117	Museums of Western Colorado	2006-08-02	scute High quarry level Good/excellent condition Field notes: very small!
5904	Saurischia indet.	Mygatt-Moore Quarry	distal caudal	D-2005.6	Museums of Western Colorado	2005-06-10	distal caudal Field ID: distal caudal, theropoda?? Poor condition Easting: 996.75 Northing: 979.25 Field notes: worn
5905	Apatosaurus excelsus	Mygatt-Moore Quarry	posterior cervical vertebra; partial cervical rib	D-2006.0117	Museums of Western Colorado	2006-07-14	posterior cervical vertebra; partial cervical rib Low quarry level Easting: 1004 Northing: 1018
5906	Saurischia	Mygatt-Moore Quarry	rib head	D-2006.0117	Museums of Western Colorado	2006-07-21	rib head Duplicate field number with MWC 5891 and MWC 7274 Field ID: rib?, dinosauria High quarry level Good condition
5907	Sauropoda indet.	Mygatt-Moore Quarry	vertebra fragments	D-2005.6	Museums of Western Colorado	2005-08-25	vertebra fragments Field ID: Vert(?), dino Poor condition Easting: 991.8 Northing: 985.1
5908	Dinosauria indet.	Mygatt-Moore Quarry	rib (gastralia?)	D-2004.7	Museums of Western Colorado	2004-07-28	rib (gastralia?) Field ID: cervical rib?, dinosauria Low quarry level, Good condition Easting: 1006 Northing: 1018 Field notes: 1.9 m from ~1017N/~1004E, near base of bone bed dipping 40 degrees SW
5909	Apatosaurus excelsus	Mygatt-Moore Quarry	cervical vertebra	D-2005.6	Museums of Western Colorado	2005-08-03	cervical vertebra Good condition Easting: 996 Northing: 997.3
5910	Sauropoda	Mygatt-Moore Quarry	partial dorsal vertebra	D-2005.6	Museums of Western Colorado	2005-07-21	partial dorsal vertebra Medium quarry level Good condition Easting: 993.7 Northing: 982.5
5911	Sauropoda	Mygatt-Moore Quarry	mid-distal caudal vertebra	D-2005.6	Museums of Western Colorado	2005-06-17	mid-distal caudal vertebra Medium quarry level Good condition Easting: 997.8 Northing: 980.5
5912	Apatosaurus excelsus	Mygatt-Moore Quarry	caudal vertebra	D-2006.0117	Museums of Western Colorado	2006-07-12	caudal vertebra Field ID: mid-caudal vert, apatosaurus Low quarry level Good condition Easting: 1007.5 Northing: 1018.5
5914	Sauropoda	Mygatt-Moore Quarry	caudal vertebrae	D-2001.10	Museums of Western Colorado	2001-07-12	Caudal vertebrae Field notes: Diplodocid?
5915	Dinosauria indet.	Mygatt-Moore Quarry	chevron	D-2005.6	Museums of Western Colorado	2005-07-14	chevron High quarry level Good condition
5916	Apatosaurus excelsus	Mygatt-Moore Quarry	mid-caudal vertebrae	D-2006.0117	Museums of Western Colorado	2006-07-21	mid-caudal vertebrae Good condition Easting: 997.5 Northing: 1019
5917	Sauropoda	Mygatt-Moore Quarry	caudal vertebrae	D-2006.0117	Museums of Western Colorado	2006-06-05	caudal vertebrae No field notes
5918	Sauropoda	Mygatt-Moore Quarry	caudal vertebrae	D-2005.6	Museums of Western Colorado	2006-06-05	caudal vertebrae No field notes
5919	Gastropoda indet.	Mygatt-Moore Quarry	external shell	D-2004.7	Museums of Western Colorado	2004-06-16	external shell, in matrix High quarry level Good condition
5920	Mymoorapelta maysi	Mygatt-Moore Quarry	Scute?	D-2004.7	Museums of Western Colorado	2004-06-16	Scute? Field ID: scute?, dinosaur Medium quarry level Easting: 1004 Northing: 1019 Field notes: used white glue to secure!
5921	Sauropoda	Mygatt-Moore Quarry	partial rib	D-2006.0117	Museums of Western Colorado	2006-09-07	partial rib Duplicate field number with MWC 6649 Medium quarry level Good condition
5922	Sauropoda	Mygatt-Moore Quarry	Astragulus	D-2006.0117	Museums of Western Colorado	2006-07-27	Astragulus High quarry level Poor condition
5923	Sauropoda	Mygatt-Moore Quarry	rib	D-2003.11	Museums of Western Colorado	2003-08-12	rib Low quarry level Good condition Easting: 998.5 Northing: 1018
5924	Sauropoda	Mygatt-Moore Quarry	partial rib	D-2000.3	Museums of Western Colorado	2000-07-18	partial ribs Excellent condition Easting: 1007 Northing: 1013 Field notes: N end 1006.92 E and 1013.2 N. S end going into a block of bone complex measured to 1007.4 E and 1012.2N. Part in jacket, rest put in packages and put in cardboard flat
5925	Sauropoda	Mygatt-Moore Quarry	partial rib	D-2005.6	Museums of Western Colorado	2005-07-22	partial rib Field ID: rib head and partial shaft, apatosaur Medium quarry level Fair condition Easting: 994 Northing: 982
5926	Sauropoda	Mygatt-Moore Quarry	coracoid? fragment	D-2005.6	Museums of Western Colorado	2005-06-10	coracoid? fragment Poor condition Easting: 994.5 Northing: 982 Field notes: worn
5928	Mymoorapelta maysi	Mygatt-Moore Quarry	scute	D-1999.6	Museums of Western Colorado	1999-08-04	scute Medium quarry level Good condition 75% completeness Easting: 992 Northing: 1010 Length: 50mm Width: 30mm Field notes: Steve Clark found around femur but found in refuse, mapped-in but exact location unsure.
5929	Sauropoda	Mygatt-Moore Quarry	dorsal vertebrae	D-2006.0117	Museums of Western Colorado	2006-07-14	dorsal vertebrae Field ID: 2 cervical verts, apatosaurus? Low quarry level Easting: 1004 Northing: 1018
5930	Sauropoda	Mygatt-Moore Quarry		D-2006.0117	Museums of Western Colorado	2006-08-29	Field ID: dorsal? vert, sauropod Low quarry level Field notes: Partial ribs included in jacket.
5931	Diplodocidae	Mygatt-Moore Quarry	femur	D-2005.6	Museums of Western Colorado	2005-06-17	femur High quarry level Good condition Easting: 997 Northing: 979 Length: 54 inches Width: 9 inches mid-shaft Field notes: proximal end not complete
5940	Mymoorapelta maysi	Mygatt-Moore Quarry	dorsal centrum	2007.01	Museums of Western Colorado	2007-05-25	dorsal centrum Field notes: surface slope wash at ~997N and ~1004E
5941	Morrolepis schaefferi	Mygatt-Moore Quarry	skeleton		Museums of Western Colorado	2007-05-11	skeleton No field notes
5966	Othnielosaurus sp.	Mygatt-Moore Quarry	jaw fragment with 3 teeth	D-2008.0065	Museums of Western Colorado	2008-07-29	jaw fragment no field notes
5999	Testudinata	Mygatt-Moore Quarry	3 vertebra, 1 indet. limb bone, & ilium	D-2005.6	Museums of Western Colorado	2005-07-22	3 vertebra, 1 indet. limb bone, & ilium Field ID:3 verts, scapula, misc., ornithopoda? Medium/low quarry level Fair/good condition Easting: 994.2 Northing: 979.3 Field notes: very small; associated, all from small pocket of green siltstone
6002	Apatosaurus sp.	Mygatt-Moore Quarry	left? maxilla	D-2007.	Museums of Western Colorado	2007-05-23	left? maxilla Duplicate field number with MWC 6001 Field ID: diplodocidae, 3 teeth in jaw frag High quarry level, Poor/fair condition Easting: 1004.5 Northing: 1020.75 Field notes: really high
6601	Sauropoda	Mygatt-Moore Quarry	vertebra	D-2008.0065	Museums of Western Colorado	2008-10-09	vertebra (transverse process fragment?) High quarry level Poor/fair condition Easting: 1004.7 Northing: 1021.5
6602	Apatosaurus sp.	Mygatt-Moore Quarry	cervical rib and associated fragments	D-2008.0065	Museums of Western Colorado	2008-08-06	cervical rib and associated fragments Low quarry level Fair condition Easting: 996 Northing: 1019 Field notes: Apato cervical rib; Allo? femur?; several ribs
6604	Allosaurus sp.	Mygatt-Moore Quarry	tibia, right	D-2008.0065	Museums of Western Colorado	2008-08-06	tibia, right, distal Duplicate field number with MWC 6602 and MWC 6603 Field ID: several, dinosauria Low quarry level Fair condition Easting: 996 Northing: 1019 Field notes: apato cervical rib; allo? femur?; several ribs
6605	Allosaurus sp.	Mygatt-Moore Quarry	rib	D-2001.10	Museums of Western Colorado	2000-08-01	rib Low quarry level Poor/fair condition Easting: 1002.2 Northing: 1014.2
6606	Dinosauria indet.	Mygatt-Moore Quarry	rib	D-2003.11	Museums of Western Colorado	2003-08-25	rib Low quarry level Easting: 997.6 Northing: 1018.2
6607	Dinosauria indet.	Mygatt-Moore Quarry	rib fragments	D-2006.0117	Museums of Western Colorado	2005-08-17	rib fragments Field ID: ?, unidentifiable Easting: 993 Northing: 980 Field notes: I'm curious about this piece KLS
6608	Sauropoda indet.	Mygatt-Moore Quarry	rib fragments	D-2002.6	Museums of Western Colorado	2002-08-08	rib fragments Duplicate field numbers with MWC 5270 and MWC 6609 Field ID: ant. caudal vert, sauropoda (apat?) Low quarry level, Fair/good condition. Easting: 1001.5 Northing: 1017 Field notes: a-neural spine b-centrum
6609	Sauropoda indet.	Mygatt-Moore Quarry	neural spine	D-2002.6	Museums of Western Colorado	2002-08-08	neural spine Duplicate field number with MWC 5270 Low quarry level, Fair/good condition Easting: 1001.5 Northing: 1017 Field notes: a-neural spine b-centrum
6610	Allosaurus sp.	Mygatt-Moore Quarry	vertebra	D-2004.7	Museums of Western Colorado	2004-06-16	vertebra Field ID: ?, dinosauria Low quarry level
6611	Dinosauria indet.	Mygatt-Moore Quarry	rib fragment	D-2006.0117	Museums of Western Colorado	2005-08-18	rib fragment Field ID: sect of dsl rib, saur Fair condition Easting: 998 Northing: 977
6612	Dinosauria indet.	Mygatt-Moore Quarry	rib fragment	D-2004.7	Museums of Western Colorado	2004-07-07	rib fragment Low quarry level Fair condition Easting: 1004 Northing: 1017
6613	Dinosauria indet.	Mygatt-Moore Quarry	pubis fragments	D-2004.7	Museums of Western Colorado	2004-07-02	pubis, fragments Field ID: bone, dinosauria Low quarry level Fair condition Easting: 1000 Northing: 1017
6614	Apatosaurus sp.	Mygatt-Moore Quarry	rib fragments	D-2003.11	Museums of Western Colorado	2003-08-26	rib fragments Duplicate field number with MWC 5486 Field ID: rib, dinosauria Low quarry level Easting: 999 Northing: 1016
6615	Dinosauria indet.	Mygatt-Moore Quarry	rib fragment	D-2005.6	Museums of Western Colorado	2005-06-29	rib fragment Duplicate field number with MWC 5657 High quarry level Fair condition Easting: 998-999 Northing: 979-980
6616	Allosaurus sp.	Mygatt-Moore Quarry	rib fragment	D-2005.6	Museums of Western Colorado	2005-06-17	rib fragment Fair/good condition Field notes say DNC
6617	Dinosauria indet.	Mygatt-Moore Quarry	rib fragment	D-2005.6	Museums of Western Colorado	2005-06-29	rib fragment Fair condition Easting: 995.7 Northing: 979
6618	Dinosauria indet.	Mygatt-Moore Quarry	skull bone?	D-2004.7	Museums of Western Colorado	2004-07-12	skull bone? Field ID: bone frag, dinosauria High quarry level, Poor condition Easting: 999 Northing: 1019 Field notes: rounded/weathered before burial, but not as badly as it appeared at first.
6619	Dinosauria indet.	Mygatt-Moore Quarry	rib fragments	D-2005.6	Museums of Western Colorado	2005-07-14	rib fragments Field notes: ribs and misc, dinosauria
6620	Dinosauria indet.	Mygatt-Moore Quarry	vertebra fragments	D-2004.7	Museums of Western Colorado	2004-07-09	vertebra fragments Medium quarry level Fair condition Easting: 1004 Northing: 1017
6621	Dinosauria indet.	Mygatt-Moore Quarry	bone fragments	D-2005.6	Museums of Western Colorado	2004-07-08	bone fragments Field ID: bone frags, dinosauria High quarry level Poor/fair condition
6622	Dinosauria indet.	Mygatt-Moore Quarry	rib fragments	D-2005.6	Museums of Western Colorado	2005-07-05	rib fragments High quarry level Fair condition Easting: 993.6 Northing: 981.9
6623	Dinosauria indet.	Mygatt-Moore Quarry	bone fragments	D-2001.10	Museums of Western Colorado	2001-07-12	bone fragments Duplicate field number with MWC 5211 and MWC 5463 Field ID: ?(limb), dinosauria Easting: 1002.8 Northing: 1014.7 Field notes: "included fragment may be from this bone"
6624	Dinosauria indet.	Mygatt-Moore Quarry	bone fragments	D-2005.6	Museums of Western Colorado	2005-07-20	bone fragments, vertebra Field ID: assorted bone, dinosauria Medium quarry level Fair condition
6625	Dinosauria indet.	Mygatt-Moore Quarry	rib fragment	D-2004.7	Museums of Western Colorado	2004-08-13	rib fragment Low quarry level Fair condition Easting: 1006 Northing: 1015
6626	Dinosauria indet.	Mygatt-Moore Quarry	rib fragment	D-2005.6	Museums of Western Colorado	2005-07-14	rib fragment Easting: 993.7 Northing: 980.5
6627	Dinosauria indet.	Mygatt-Moore Quarry	rib fragment	D-2001.10	Museums of Western Colorado	2001-07-19	rib fragment Low quarry level Poor condition Field notes: fragment
6628	Dinosauria indet.	Mygatt-Moore Quarry	rib fragment	D-2004.7	Museums of Western Colorado	2004-08-11	rib fragment Duplicate field number with MWC 5664 Low quarry level Good condition Easting: 1000 Northing: 1018
6629	Allosaurus sp.	Mygatt-Moore Quarry	bone fragment, angular?	D-2003.11	Museums of Western Colorado	2003-07-21	bone fragment, angular? Field ID: rounded frag, dinosauria? High quarry level, Poor condition Easting: 997.5 Northing: 1019 Field notes: high and worn
6630	Dinosauria indet.	Mygatt-Moore Quarry	rib fragment	D-2005.6	Museums of Western Colorado	2005-07-05	rib fragment Duplicate field number with MWC 6622 High quarry level Fair condition Easting: 993.6 Northing: 981.9
6631	Dinosauria indet.	Mygatt-Moore Quarry	rib fragment	D-2004.7	Museums of Western Colorado	2004-08-04	rib fragments Field ID: bone. dinosauria High quarry level Good condition Easting: 1004 Northing: 1019
6632	Dinosauria indet.	Mygatt-Moore Quarry	rib fragment	D-2004.7	Museums of Western Colorado	2004-07-06	rib fragment Low quarry level Good condition Easting: 1000 Northing: 1017
6633	Sauropoda indet.	Mygatt-Moore Quarry	Cervical vertebra	D-2000.3	Museums of Western Colorado	2000-08-10	Cervical vertebra High quarry level Poor condition Easting: 1005.8 Northing: 1014.50 Field notes: smashed
6634	Allosaurus sp.	Mygatt-Moore Quarry	rib fragments	D-2005.6	Museums of Western Colorado	2005-06-29	rib fragments Duplicate field number with MWC 5657 and MWC 6615 High quarry level Fair condition Easting: 998-999 Northing: 979-980
6636	Sauropoda? indet.	Mygatt-Moore Quarry	phalanx?	D-2000.3	Museums of Western Colorado	2003-07-17	phalanx? Low quarry level Fair/good condition Easting: 1000.4 Northing: 1018.1
6637	Sauropoda? indet.	Mygatt-Moore Quarry	rib fragment	D-2003.11	Museums of Western Colorado	2003-08-19	rib fragment Low quarry level, Fair condition Easting: 1002.8 Northing: 1018.1 Field notes: under cervical and seems to continue
6638	Dinosauria indet.	Mygatt-Moore Quarry	rib fragment?	D-2001.10	Museums of Western Colorado	2001-06-05	rib fragment? Field ID: ?, dinosauria Medium quarry level Easting: 998.8 (1003.8?) Northing: 1015.9
6639	Allosaurus sp.	Mygatt-Moore Quarry	vertebra	D-2003.11	Museums of Western Colorado	2003-06-10	vertebra Field ID: ?, vertebrata Medium quarry level Excellent condition Easting: 998.8 Northing: 1017.3
6640	Dinosauria indet.	Mygatt-Moore Quarry	vertebra fragments	D-2005.6	Museums of Western Colorado	/ /	vertebra fragments No field notes
6641	Dinosauria indet.	Mygatt-Moore Quarry	limb end?	D-2004.7	Museums of Western Colorado	2004-08-17	limb end? Field ID: rib head or limb end, dinosauria Medium quarry level Good condition Easting: 1004 Northing: 1014
6642	Dinosauria indet.	Mygatt-Moore Quarry	bone fragment	D-2005.6	Museums of Western Colorado	2005-06-22	bone fragment Field ID: scraps, dinosauria Fair condition Easting: 997 Northing: 978.5
6643	Dinosauria indet.	Mygatt-Moore Quarry	rib? fragment	D-2005.6	Museums of Western Colorado	2005-07-19	rib fragment? Field ID: rib frags and asst, dinosauria High quarry level Fair condition
6644	Dinosauria indet.	Mygatt-Moore Quarry	rib	D-2005.6	Museums of Western Colorado	2005-07-19	rib fragment? Labelled DNC in field notes High quarry level Fair condition
6646	Sauropoda indet.	Mygatt-Moore Quarry	pelvic fragments	D-2008.0065	Museums of Western Colorado	2008-07-03	pelvic fragments Low quarry level Poor/fair condition Easting: 1002 Northing: 1020.3
6647	Dinosauria indet.	Mygatt-Moore Quarry	bone fragment	D2007.0018	Museums of Western Colorado	2007-06-14	bone fragment Duplicate field number with MWC 6973 High quarry level Poor/fair condition
6648	Dinosauria indet.	Mygatt-Moore Quarry	rib fragments	D-2008.0065	Museums of Western Colorado	2008-08-06	rib fragments Duplicate field number with MWC 6602, MWC 6603, MWC 6604 Low quarry level, Fair condition Easting: 996 Northing: 1019 Field notes: apato cervical rib; allo? femur?; several ribs
6649	Sauropoda indet.	Mygatt-Moore Quarry	rib fragments	D-2006.0117	Museums of Western Colorado	2006-09-07	rib fragments Duplicate field number with MWC 5921 High/medium quarry level Good condition
6650	Apatosaurus sp.	Mygatt-Moore Quarry	cervical vertebra	D-2008.0065	Museums of Western Colorado	2008-07-16	cervical vertebra fragment From "Kay's Cervical" Easting: 1001.7 Northing: 1020.6
6651	Dinosauria indet.	Mygatt-Moore Quarry	rib fragments	D-2002.6	Museums of Western Colorado	2002-07-10	rib fragments Duplicate field number with MWC 6703 and 7410 Field ID: block, dinosauria frags Fair/good condition Easting: 993.3 Northing: 1013.4
6652	Sauropoda indet.	Mygatt-Moore Quarry	chevron	D-2008.0065	Museums of Western Colorado	2008-07-31	chevron High quarry level Poor condition Easting: 1003.7 Northing: 1022
6653	Dinosauria indet.	Mygatt-Moore Quarry	rib fragment?	D2007.0018	Museums of Western Colorado	2007-06-20	rib fragment? Low quarry level, Poor/fair condition Easting: 1001.2 Northing: 1020.5 Field notes: rounded
6654	Sauropoda	Mygatt-Moore Quarry	rib fragment?	D-2004.7	Museums of Western Colorado	2004-08-17	rib fragment? Low quarry level Poor/fair condition Easting: 1002 Northing: 1019
6655	Dinosauria indet.	Mygatt-Moore Quarry	rib fragment?	D-2009.0033	Museums of Western Colorado		rib fragment? No field notes
6656	Dinosauria indet.	Mygatt-Moore Quarry	rib fragment?	D-2008.0065	Museums of Western Colorado	2009-07-18	rib fragment? Low quarry level Fair condition Easting: 998.8 Northing: 1020.5
6661	Dinosauria indet.	Mygatt-Moore Quarry	rib fragments?	D-2005.6	Museums of Western Colorado	2005-07-20	rib fragments? Medium quarry level Fair condition
6662	Dinosauria indet.	Mygatt-Moore Quarry	rib fragment?	D-2008.0065	Museums of Western Colorado	2008-08-19	rib fragment? Field notes blank save field ID, collector, and date collected
6663	Allosaurus sp.	Mygatt-Moore Quarry	rib fragment	D-2008.0065	Museums of Western Colorado	2008-07-03	rib fragment? Medium quarry level Fair/good condition Easting: 999.2 Northing: 1020.8
6664	Dinosauria indet.	Mygatt-Moore Quarry	vertebra fragment	D-2008.0065	Museums of Western Colorado	2008-08-15	Vertebra fragment Poor/fair condition Easting: 1002.5 Northing: 1021.99 Length: 4in Width: 2in Field notes: alone, oh so alone.
6666	Sauropoda indet.	Mygatt-Moore Quarry	metapodial	D-2008.0065	Museums of Western Colorado	2008-05-01	metapodial Fair condition Easting: 1008.85 Northing: 1021.25
6667	Dinosauria indet.	Mygatt-Moore Quarry	bone fragments	D-2008.0065	Museums of Western Colorado	2008-06-11	bone fragments High quarry level Poor condition Easting: 1003.25 Northing: 1021
6668	Dinosauria indet.	Mygatt-Moore Quarry	bone fragments	D-2008.0065	Museums of Western Colorado	2008-06-11	bone fragments Medium quarry level Poor condition Easting: 1000.5 Northing: 1020.5
6670	Sauropoda indet.	Mygatt-Moore Quarry	rib fragment	D-1995.1.1	Museums of Western Colorado	1995-06-28	rib fragment, flat piece Notes: Duplicate field number with MWC 4294 Good condition, 50% completeness Easting: 988 Northing: 992 Long section, no ends, easy prep. Extra piece thrown away after prep.
6673	Dinosauria indet.	Mygatt-Moore Quarry	rib fragments				rib fragments No field notes
6674	Sauropoda indet.	Mygatt-Moore Quarry	cervical? fragment	D-2008.0065	Museums of Western Colorado	2008-07-17	cervical? fragment Field notes say DNC Low quarry level, Poor/fair condition Easting: 998.5 Northing: 1020.4 Field notes: "gumby"
6677	Sauropoda indet.	Mygatt-Moore Quarry	metatarsal	D-2008.0065	Museums of Western Colorado	2008-09-10	metatarsal, very fragmented Low quarry level Fair/good condition Easting: 990.2 Northing: 980.5
6678	Dinosauria indet.	Mygatt-Moore Quarry	rib fragment	D-2009.0033	Museums of Western Colorado	2009-07-03	rib fragment Medium quarry level; From secondary pit Good condition Easting: 985 Northing: 989.5
6695	Dinosauria indet.	Mygatt-Moore Quarry	rib fragment	D2007.0018	Museums of Western Colorado	2008-07-29	rib, large fragment No field notes From Cooley Pit
6696	Theropoda indet.	Mygatt-Moore Quarry	humerus?	D-2005.6	Museums of Western Colorado	2005-08-18	humerus? Field ID: unident, theropod? Good condition Easting: 992 Northing: 981 Length: 23cm Field ID: incomplete, one end of element
6700	Sauropoda indet.	Mygatt-Moore Quarry	cervical	D-2008.0065	Museums of Western Colorado	2008-07-17	cervical Duplicate field number with MWC 6674 Field notes say DNC, Poor/fair condition, Low quarry level Easting: 998.5 Northing: 1020.4 Field notes: "Gumby"
6702	Sauropoda	Mygatt-Moore Quarry	rib	D-2008.0065	Museums of Western Colorado	2008-09-02	rib Field notes say DNC Low quarry level Good condition Easting: 1000.7 Northing: 1021.5
6703	Allosaurus sp.	Mygatt-Moore Quarry	caudal	D-2002.6	Museums of Western Colorado	2002-07-10	caudal Field ID: block, dinosauria frags Fair/good condition Easting: 993.3 Northing: 1013.4 Field notes: other isolated fragments collected from approx 993.0E, 1013.0-1013.5N, referred to as 653. A collected July 10-02, Peter Abbott and Vaia Barkas. B collected July 24/02 Suzi (AMNH). C in good condition. Main concentration of good condition fragments at given Easting/Northing of block
6704	Allosaurus sp.	Mygatt-Moore Quarry	gastralia	D-1997.2.1	Dinamation International Society	1997-08-19	gastralia Field ID: allosaurus sternal rib On Pebble bed Easting: 1001.0 Northing: 1012.3 Length: 38cm Width: 3cm
6705	Allosaurus sp.	Mygatt-Moore Quarry	gastralia	D-1997.2.1	Dinamation International Society	1997-07-22	gastralia Field number 97-93 does not exist 20cm above Pebble bed Easting: 1001.8 Northing: 1012.6
6706	Sauropoda	Mygatt-Moore Quarry	cervical vertebra	D-2008.0065	Museums of Western Colorado	2008-09-17	cervical vertebra Low quarry level Good condition Easting: 997.3 Northing: 1020.5 Field notes: DNC frag
6707	Apatosaurus sp.	Mygatt-Moore Quarry	cervical rib	D-2008.0065	Museums of Western Colorado	2008-07-31	cervical rib High quarry level Poor condition Easting: 1003.7 Northing: 1021.9
6708	Sauropoda indet.	Mygatt-Moore Quarry	metatarsal	D-2008.0065	Museums of Western Colorado	2008-09-03	metatarsal Low quarry level Poor condition Easting: 993.1 Northing: 978.8 Field notes: Pebble layer; 20, 1 degree NE
6709	Dinosauria indet.	Mygatt-Moore Quarry	rib fragment	D-2008.0065	Museums of Western Colorado	2008-08-03	rib fragment Fair condition Easting: 993 Northing: 978.5
6710	Sauropoda	Mygatt-Moore Quarry	caudal vertebra	D-2009.0033	Museums of Western Colorado	2009-08-10	caudal vertebra Low quarry level Good condition Easting: 986 Northing: 983.4 Field notes: fthere is a bag of fragments in jacket near dotted circle
6711	Allosaurus sp.	Mygatt-Moore Quarry	caudal vertebra	D-2009.0033	Museums of Western Colorado	2009-07-03	caudal vertebra Low quarry level Good condition Easting: 1001.3 Northing: 1021.3
6712	Apatosaurus sp.	Mygatt-Moore Quarry	rib fragment	D-2008.0065	Museums of Western Colorado	2008-08-20	rib fragment (gastralia?) Field ID: vertebra?, sauropod Low quarry level Fair/good condition Field notes: butterfly!
6713	Apatosaurus sp.	Mygatt-Moore Quarry	vertebra material?	D2007.0018	Museums of Western Colorado	2007-05-16	vertebra material? Low quarry level Poor/fair condition Field notes: DNC frags
6714	Dinosauria indet.	Mygatt-Moore Quarry	rib	FIC2009			Pathologic rib No field notes
6715	Sauropoda	Mygatt-Moore Quarry	Hyposphene	D-2008.0065	Museums of Western Colorado	2008-07-15	Hyposphene Field ID: small vert Low quarry level Good condition Easting: 992.7 Northing: 978.5 Field notes: sitting on ash layer
6716	Sauropoda indet.	Mygatt-Moore Quarry	metacarpal 4?	D-2008.0065	Museums of Western Colorado	2008-09-10	metacarpal, 4? Duplicate field number with MWC 6677 Low quarry level Fair/good condition Easting: 990.2 Northing: 980.5
6717	Sauropoda	Mygatt-Moore Quarry	Posterior cervical or anterior dorsal vertebra	FIC2009			Posterior cervical or anterior dorsal vertebra No field notes
6718	Sauropoda	Mygatt-Moore Quarry	skin, carbonized	D-2008.0065	Museums of Western Colorado	2008-07-03	skin, carbonized Duplicate field number with MWC 6646 Field ID: pelvic chunk, large, sauropoda Low quarry level Poor/fair condition Easting: 1002 Northing: 1020.3
6719	Apatosaurus sp.	Mygatt-Moore Quarry	pubic peduncle	D-2008.0065	Museums of Western Colorado	2008-07-03	pubic peduncle Duplicate field number with MWC 6646 and MWC 6718 Low quarry level Poor/fair condition Easting: 1002 Northing: 1020.3
6720	Dinosauria indet.	Mygatt-Moore Quarry	skull or vertebra fragments	D-2008.0065	Museums of Western Colorado	2008-09-10	Possible skull or vertebra piece (with fragments) Field ID: small?, dinosauria? Medium quarry level, Fair condition Easting: 988 Northing: 982 Field notes: 1 foot above Pebble layer, same area had possible (illegible)
6721	Allosaurus sp.	Mygatt-Moore Quarry	rib	D-2006.0117	Museums of Western Colorado	2006-07-07	rib Medium quarry level Good condition Easting: 1005.5 Northing: 1014.5
6724	Allosaurus sp.	Mygatt-Moore Quarry	rib	D-1997.2.1	Dinamation International Society	1997-08-11	rib 40cm above Pebble bed Easting: 1002.35 Northing: 1012.85 Field notes: Allo rib with head
6725	Allosaurus sp.	Mygatt-Moore Quarry	gastralia	FIC2009	Dinamation International Society	1993-08-02	gastralia 20cm above Pebble bed Easting: 996.2 Northing: 1006.9 Length: 30cm (?)
6726	Allosaurus sp.	Mygatt-Moore Quarry	rib	FIC2009	Dinamation International Society	1994-08-22	rib 10cm above Pebble bed Easting: 999.6 Northing: 1009.7 Length: 30cm
6728	Mymoorapelta maysi	Mygatt-Moore Quarry	ungual	D-2000.3	Museums of Western Colorado	2000-08-17	ungual Low quarry level Good condition Easting: 1002.3 Northing: 1014.8
6729	Mymoorapelta maysi	Mygatt-Moore Quarry	rib	D-2003.11	Museums of Western Colorado	2003-08-05	rib Low quarry level Fair condition Easting: 1004.9 Northing: 1015.3 Field notes: maybe allosaurus?; in 3 pieces needs to be glued
6730	Theropoda indet.	Mygatt-Moore Quarry	phalange	D-1997.1.1	Museums of Western Colorado	1997-07-10	phalange Field ID: phalanx, theropoda Low quarry level Good condition Easting: 988 Northing: 1003
6731	Allosaurus sp.	Mygatt-Moore Quarry	gastralia	D-1997.2.1	Dinamation International Society	1997-07-21	gastralia Field identification was as a Mymoorapelta fibula (?) 20cm above Pebble bed Easting: 1001.9 Northing: 1011.3 Length: 16cm Width: 3cm
6732	Mymoorapelta maysi	Mygatt-Moore Quarry	caudal vertebra	D-1998.1.1	Museums of Western Colorado	1997-06-23	caudal vertebra Easting: 1001.65 Length: 30cm Width: 15cm Dinamation
6733	Mymoorapelta maysi	Mygatt-Moore Quarry			Museums of Western Colorado	1992-08-05	vertebra No field notes
6734	Mymoorapelta maysi	Mygatt-Moore Quarry	dorsal vertebra	D-1996.2.1	Dinamation International Society	1996-08-18	dorsal vertebra In pebble bed Easting: 1004.0 Northing: 1011.6
6735	Mymoorapelta maysi	Mygatt-Moore Quarry	dorsal vertebra	FIC2009			dorsal vertebra No field notes
6736	Mymoorapelta maysi	Mygatt-Moore Quarry	caudal vertebra	FIC2009	Museums of Western Colorado	1998-08-13	caudal vertebra On Pebble bed Excellent condition 75-100% completeness Easting: 988 Northing: 1006 Length: 40mm Width: 130mm
6737	Mymoorapelta maysi	Mygatt-Moore Quarry	dorsal with chevron	FIC2009	Museums of Western Colorado	1995-08-23	Dorsal with chevron Pebble bed Easting: 990.0 Northing: 1005.6 Length: 15cm Dinamation
6738	Mymoorapelta maysi	Mygatt-Moore Quarry	cervical vertebra	D-1999.6	Museums of Western Colorado	1999-08-12	cervical vertebra Medium quarry level Excellent condition Easting: 997 Northing: 1013.4
6739	Mymoorapelta maysi	Mygatt-Moore Quarry	dorsal vertebra	FIC2009			dorsal vertebra No field notes
6743	Mymoorapelta maysi	Mygatt-Moore Quarry	partial scapula, preserving acromian & glenoid processes	D-2000.3	Museums of Western Colorado	2000-08-29	partial scapula, preserving acromian & glenoid processes (right) Low quarry level Poor/fair condition Easting: 1005.60 Northing: 1013 Field notes: partial scapula missing blade
6744	Mymoorapelta maysi	Mygatt-Moore Quarry	postorbital	FIC2009			postorbital No field notes
6745	Mymoorapelta maysi	Mygatt-Moore Quarry	humerus	FIC2009			left humerus No field notes
6746	Mymoorapelta maysi	Mygatt-Moore Quarry	tibia	FIC2009			tibia, right No field notes
6747	Mymoorapelta maysi	Mygatt-Moore Quarry	Spine, lower caudal	D-1997.1.1	Museums of Western Colorado	1997-06-30	spine, lower caudal Field ID: scute/spine armor, mymoorapelta Low quarry level. (Pebble bed) Excellent condition Easting: 987.05 Northing: 1002.40
6748	Mymoorapelta maysi	Mygatt-Moore Quarry	Spike	D-1998.1.1	Museums of Western Colorado	1998-08-06	spine, tip only Field ID: scute, mymoorapelta Low quarry level Good/excellent condition 75-100% completeness Length: 70mm Width: 60mm
6749	Mymoorapelta maysi	Mygatt-Moore Quarry	spine tip	D-1997.2.1	Dinamation International Society	1997-06-18	spine, tip only 30 cm above pebble bed Easting: 1000.8 Northing: 1012.25
6750	Mymoorapelta maysi	Mygatt-Moore Quarry	Spike	D-1995.2.1	Museums of Western Colorado	1995-09-07	spine, tip only Field ID: akylo spike In pebble bed Easting: 989.50 Northing: 1006.1 Length: 9cm Width: 6cm Dinamation
6751	Mymoorapelta maysi	Mygatt-Moore Quarry	sacral shield armor	D-1998.1.1	Museums of Western Colorado	1998-06-23	sacral shield armor Field ID: 4 scutes Bottom quarry level Good condition 75% completeness Easting: 986 Northing: 1005 Length: 80mm Width: 30mm
6752	Mymoorapelta maysi	Mygatt-Moore Quarry	spine, second cervical ring	D-1998.1.1	Museums of Western Colorado	1998-07-16	spine, second cervical ring Field ID: armor spine of neck, mymoorapelta Excellent condition 100% completeness Easting: 989 Northing: 1006 Length: 100mm Width: 65mm
6753	Mymoorapelta maysi	Mygatt-Moore Quarry	dorsal plate (scute)	D-1998.1.1	Museums of Western Colorado	1998-07-16	dorsal plate (scute) Field ID: armor scute, mymoorpelta Good condition 75-100% completeness Easting: 989 Northing: 1006 Length: 65mm Width: 50mm
6754	Mymoorapelta maysi	Mygatt-Moore Quarry	Dorsal plate (scute)	D-1998.1.1	Museums of Western Colorado	1998-06-29	dorsal plate (scute) Low quarry level (pebble bed) Excellent condition 100% completeness Length: 65mm Width: 30mm Field notes: found in refuse around 989-1001
6755	Mymoorapelta maysi	Mygatt-Moore Quarry	Dorsal plate (scute)	D-1998.1.1	Museums of Western Colorado	1998-06-22	dorsal plate (scute) Bottom level of quarry 100% completeness Easting: 987 Northing: 1004 Length: 70mm Width: 60mm
6756	Mymoorapelta maysi	Mygatt-Moore Quarry	Dorsal scute	D-1995.2.1	Dinamation International Society	1995-07-08	dorsal scute 30 cm above pebble bed Easting: 993.3 Northing: 1008.8
6757	Mymoorapelta maysi	Mygatt-Moore Quarry	Dorsal scute	FIC2009	Dinamation International Society	1993-06-15	dorsal scute Field ID: nodo scute 40 cm above pebble bed Easting: 997.6 Northing: 1007.8 Length: 6cm Field notes: nice
6758	Mymoorapelta maysi	Mygatt-Moore Quarry	scute	D-1995.2.1	Dinamation International Society	1995-09-17	scute 20cm above pebble bed Easting: 1000.9 Northing: 1010.75 Length: 5cm
6759	Mymoorapelta maysi	Mygatt-Moore Quarry	scute	D-1998.1.1	Museums of Western Colorado	1998-07-29	scute Good condition 100% completeness Northing: 988 Easting: 1000
6760	Mymoorapelta maysi	Mygatt-Moore Quarry	scute	FIC2009			scute No field notes. Not valid field number at this time
6761	Mymoorapelta maysi	Mygatt-Moore Quarry	scute	D-1996.2.1	Dinamation International Society	1996-08-19	scute 20 cm above pebble bed Easting: 999.0 Northing: 1011.9 Length: 2cm
6762	Mymoorapelta maysi	Mygatt-Moore Quarry	scute	D-1998.1.1	Museums of Western Colorado	1998-08-18	scute Low quarry level Excellent condition 100% completeness Easting: 984 Northing: 1002 Length: 75mm Width: 75mm
6763	Mymoorapelta maysi	Mygatt-Moore Quarry	scute	D-1998.1.1	Museums of Western Colorado	1998-08-25	scute Low quarry level Good condition 75-100% completeness Easting: 987 Northing: 1005 Length: 50mm Width: 40mm
6764	Mymoorapelta maysi	Mygatt-Moore Quarry	scute	FIC2009			scute No field notes
6765	Mymoorapelta maysi	Mygatt-Moore Quarry	scute		Dinamation International Society	1994-07-16	scute Field ID: nodo scute 50 cm above pebble bed Easting: 998.30 Northing: 1009.6 Length: 6cm Field notes: blunt end missing about 1/2 cm
6766	Mymoorapelta maysi	Mygatt-Moore Quarry	scute	D-1997.2.1	Dinamation International Society	1997-07-09	scute On pebble bed Easting: 1003.0 Northing: 1012.3
6767	Mymoorapelta maysi	Mygatt-Moore Quarry	scute	D-1997.1.1	Museums of Western Colorado	1997-08-21	scute Low quarry level Easting: 984.4 Northing: 1000.5
6768	Mymoorapelta maysi	Mygatt-Moore Quarry	scute	D-1998.1.1	Museums of Western Colorado	1998-08-11	scute Low quarry level Excellent condition 100% completeness Length: 70mm Width: 65mm
6769	Mymoorapelta maysi	Mygatt-Moore Quarry	scute	D-1995.2.1	Dinamation International Society	1995-08-22	scute Pebble bed Easting: 989.7 Northing: 1004.7 Length: 8cm Dinamation
6785	Mymoorapelta maysi	Mygatt-Moore Quarry	scute	D-1998.1.1	Museums of Western Colorado	1998-07-14	scute Low quarry level Good condition 75% completeness Easting: 987 Northing: 1002 Field notes: corner gone, found in refuse from broad area 987 E 1002 N, not mapped
6786	Mymoorapelta maysi	Mygatt-Moore Quarry	scute	D-1998.1.1	Museums of Western Colorado	1998-08-13	scute Low quarry level (pebble bed) Excellent condition 100% completeness Easting: 985 Northing: 1002 Length: 45mm Width: 40mm
6787	Mymoorapelta maysi	Mygatt-Moore Quarry	scute	D-1998.1.1	Museums of Western Colorado	1998-08-13	scute Low quarry level (pebble bed) Good condition 75-100% completeness Easting: 985 Northing: 1002 Length: 40mm Width: 30mm Field notes: thin edges gone
6788	Mymoorapelta maysi	Mygatt-Moore Quarry	scute	D-1998.1.1	Museums of Western Colorado	1998-06-23	scute Bottom quarry level Easting: 986.95 Northing: 1001.7
6789	Mymoorapelta maysi	Mygatt-Moore Quarry	scute	D-1999.6	Museums of Western Colorado	1999-07-27	scute Low quarry level Fair condition Easting: 991.2 Northing: 1009.3
6790	Mymoorapelta maysi	Mygatt-Moore Quarry	scute	D-1998.1.1	Museums of Western Colorado	1998-06-30	scute Duplicate with MWC 6951 Low quarry level (pebble bed) Excellent condition 100% completeness Easting: 985.3 Northing: 1002.25 Length: 17mm Width: 15mm Field notes: small button scute
6791	Mymoorapelta maysi	Mygatt-Moore Quarry	scute	D-1995.2.1	Dinamation International Society	1995-07-18	scute 40 cm above pebble bed Easting: 999.4 Northing: 1011.2 Width: 2cm Dinamation
6792	Mymoorapelta maysi	Mygatt-Moore Quarry	scute	D-1994.2.1	Dinamation International Society	1994-07-12	scute In pebble bed Easting: 998.3 Northing: 1009.5 Length: 1cm Field notes; very nice, nodo scute small
6793	Mymoorapelta maysi	Mygatt-Moore Quarry	scute	D-1998.1.1	Museums of Western Colorado	1998-07-28	scute Easting: 986 Northing: 1003
6794	Mymoorapelta maysi	Mygatt-Moore Quarry	scute	D-1992.1.1	Museums of Western Colorado	1992-10-05	scute No field notes
6795	Mymoorapelta maysi	Mygatt-Moore Quarry	scute	D-1995.2.1	Dinamation International Society	1995-07-18	scute 10 cm above pebble bed Easting: 992.30 Northing: 1007.70 Length: 5cm Width: 4.5cm Dinamation
6796	Mymoorapelta maysi	Mygatt-Moore Quarry	scute	D-1995.1.1	Museums of Western Colorado	1992-09-08	scute No field notes
6797	Mymoorapelta maysi	Mygatt-Moore Quarry	scute	FIC 2009			scute? No field notes
6799	Mymoorapelta maysi	Mygatt-Moore Quarry	scute	FIC2009			scute No field notes
6806	Dinosauria indet.	Mygatt-Moore Quarry	rib	D-2009.0033	Museums of Western Colorado	2009-07-01	rib Low quarry level Good condition Easting: 1001.5 Northing: 1021 Field notes: had a piece of bone lying right next to it which was included in the bag
6817	Sauropoda	Mygatt-Moore Quarry	vert?	D-2008.0065	Museums of Western Colorado	2007-08-31	VERT? Fair condition Easting: 996.6 Northing: 1018.15 Field notes: fell out of hill after backbone removed 1370. Remainder still in hillside
6824	Allosaurus sp.	Mygatt-Moore Quarry	humerus	D-1998.1.1	Museums of Western Colorado	1998-08-05	proximal half of humerus, partially crushed diaphysis found low in the quarry
6825	Allosaurus sp.	Mygatt-Moore Quarry	caudal centrum	D-1998.1.1	Museums of Western Colorado	1998-08-11	caudal centrum, partial Medium quarry level Fair condition 50% completeness Easting: 993 Northing: 1010 Field notes: partial centrum
6930	Mymoorapelta maysi	Mygatt-Moore Quarry	rib	D-1998.1.1	Museums of Western Colorado	1998-08-18	Rib fragment Low quarry level Good condition Length: 100mm
6931	Allosaurus sp.	Mygatt-Moore Quarry	vertebra	D-1999.6	Museums of Western Colorado	1999-07-06	vertebra Low quarry level, Fair/good condition Easting: 993.4 Northing: 1009.6 Field notes: in Pebble layer, bottom side good and upper exposed side eroded.
6932	Mymoorapelta maysi	Mygatt-Moore Quarry	2 fused sacral centra	D-1998.1.1	Museums of Western Colorado	1998-07-10	2 fused sacral centra Field ID: nodosaur, vertebra, sacral Low quarry level Poor condition Easting: 982 Northing: 1003 Field notes: 2 fused sacral centra
6933	Sauropoda indet.	Mygatt-Moore Quarry	ischium				ischium No field notes
6950	Sauropoda indet.	Mygatt-Moore Quarry	vertebra				Vertebra, sawed into two pieces and polished on inside only one piece present 10/19 No field notes
6951	Dinosauria indet.	Mygatt-Moore Quarry	Rib	D-1997.1.1	Museums of Western Colorado	1997-01-01	Rib fragment, long narrow Field ID: scute, mymoorapelta Field notes: small button-scute Low quarry level (Pebble bed) Excellent condition, 100% completeness Easting: 985.3 Northing: 1002.25
6957	Allosaurus fragilis	Mygatt-Moore Quarry	1st digit	FIC			ungual phalanx (manual) No field notes
6958	Allosaurus fragilis	Mygatt-Moore Quarry	1st digit	FIC			ungual phalanx (manual) No field notes
6960	Dinosauria indet.	Mygatt-Moore Quarry	chevron	FIC	Dinamation International Society	1990-07-17	small partial chevron No field notes
6962	Allosaurus fragilis	Mygatt-Moore Quarry	cervical rib?	2007.01	Museums of Western Colorado	2007-05-18	cervical rib? fragments Low quarry level Poor/fair condition Easting: 996.5 Northing: 1018.7
6963	Sauropoda indet.	Mygatt-Moore Quarry	ungual	D-2008.0065	Museums of Western Colorado	2008-09-10	ungual Low quarry level Good condition Easting: 990 Northing: 981
6964	Dinosauria indet.	Mygatt-Moore Quarry	Skull fragment	D-2007.0149	Museums of Western Colorado	2007-06-19	"skull fragment" Easting: 1002.75 Northing: 1020.75
6966	Sauropoda indet.	Mygatt-Moore Quarry	partial jaw fragment	D-2003.11	Museums of Western Colorado	2003-06-23	partial jaw fragment Medium quarry level Fair condition Easting: 1002.5 Northing: 1018
6967	Sauropoda indet.	Mygatt-Moore Quarry	distal phalanx		Museums of Western Colorado	1994-09-19	Toe bone, from a juvenile On Pebble bed Easting: 991.2 Northing: 1006.0
6968	Saurischia	Mygatt-Moore Quarry	rib	FIC2010		/ /	Rib No field notes
6971	Sauropoda indet.	Mygatt-Moore Quarry	chevron	D-2007	Museums of Western Colorado	2007-06-13	Chevron large piece, marked "2 ,/" Low quarry level
6972	Sauropoda indet.	Mygatt-Moore Quarry	chevron	D-2007	Museums of Western Colorado	2007-07-03	Chevron Low quarry level Easting: 997.8 Northing: 1019.5 Field notes: Zach has proximal end
6973	Sauropoda indet.	Mygatt-Moore Quarry	chevron	D-2007	Museums of Western Colorado	2007-06-14	Chevron High quarry level Poor/fair condition
6974	Sauropoda	Mygatt-Moore Quarry		D-1995.2.1	Dinamation International Society	1995-09-17	Field ID: Apatosaur chevron On pebble bed Easting: 1000 Northing: 1010.5
6975	Sauropoda indet.	Mygatt-Moore Quarry	chevron	D-1998.1.1	Museums of Western Colorado	1998-06-30	Chevron fragment 30cm above Pebble bed Easting: 999.1 Northing: 1012.7 Length: 30cm?
6977	Mymoorapelta maysi	Mygatt-Moore Quarry	neck armor piece; anterior ring, right side, medial element (unfused contact surface faces lateral piece)	2010	Museums of Western Colorado	2010-07-27	neck armor Field ID: fragment, dinosauria, mymoorapelta Low quarry level Fair condition Easting: 988.08 Northing: 987.1 Length: 5cm Width: 5cm Field notes: armor
6979	Reptilia indet.	Mygatt-Moore Quarry	small bone fragment	D-1999.6	Museums of Western Colorado	1999-07-20	small bone fragment Medium quarry level Fair condition Easting: 993.25 Northing: 1011.8
6987	Vertebrata indet.	Mygatt-Moore Quarry	phalanx	D-1998.1.1	Museums of Western Colorado	1998-08-04	phalanx, small distal end, in matrix Field ID: tooth crown, allosaurus Easting: 987 Northing: 1006
6997	Dinosauria indet.	Mygatt-Moore Quarry	caudal vertebra	D-1998.1.1	Museums of Western Colorado	1998-06-23	caudal vertebra Field ID: distal caudal Bottom quarry level Easting: 986.65 Northing: 1002.12 Length: 55mm Width: 15mm
7064	Mymoorapelta maysi	Mygatt-Moore Quarry	scute	D-1998.1.1	Museums of Western Colorado	1998-07-10	scute in epoxy + thin section Field ID: scute, medium ridge, mymoorapelta Excellent condition, 100% completeness Easting: 886 Northing: 1002 Length: 35mm
7257	Allosaurus sp.	Mygatt-Moore Quarry	caudal	D-1999.6	Museums of Western Colorado	1999-07-12	caudal Field ID: vertebra TP? allosaurus Low quarry level Poor condition Easting: 992.5 Northing: 1010 Field notes: part under vert 324
7258	Allosaurus sp.	Mygatt-Moore Quarry	left distal tibia	D-1999.6	Museums of Western Colorado	1999-06-17	left distal tibia Fair condition Easting: 992.8 Northing: 1009.8 Field notes: large piece sticking up on edge.
7259	Allosaurus sp.	Mygatt-Moore Quarry	ischium				ischium No field notes
7260	Dinosauria indet.	Mygatt-Moore Quarry	axis	D-1998.1.1	Museums of Western Colorado	1998-07-16	axis Field ID: vertebra, cervical? dorsal, apatosaurus Low quarry level, Fair condition, 50-75% completeness Easting: 989 Northing: 1004 Length: 300mm
7261	Allosaurus sp.	Mygatt-Moore Quarry	rib			1997-06-10	rib No field notes
7263	Allosaurus sp.	Mygatt-Moore Quarry	pes claw	D-1997.2.1	Dinamation International Society	1997-06-23	pes claw 30cm above Pebble bed Easting: 1001.75 Northing: 1012.8 Length: 10cm
7264	Sauropoda indet.	Mygatt-Moore Quarry	dorsal vertebra	D-2006.0117	Museums of Western Colorado	2006-06-07	dorsal vertebra High quarry level Fair condition Easting: 997.4 Northing: 1019.1
7265	Saurischia indet.	Mygatt-Moore Quarry	chevron?	D-2006.0117	Museums of Western Colorado	2006-07-06	chevron? Field ID: chevron and assorted, dinosauria Low quarry level Good condition Easting: 1005 Northing: 1018
7266	Allosaurus sp.	Mygatt-Moore Quarry	angular?	D-1998.2.1	Dinamation International Society	1998-08-05	angular? bone fragment Field notes missing
7267	Theropoda indet.	Mygatt-Moore Quarry	carpal?	D-2001.10	Museums of Western Colorado	2001-07-03	carpal? High quarry level Fair condition Easting: 1005 Northing: 1015 Field notes: in quarry wall
7268	Allosaurus sp.	Mygatt-Moore Quarry	caudal vertebra	D-1998.1.1	Museums of Western Colorado	1998-07-23	caudal vertebrae Field ID: vertebra, caudal, apatosaurus Low quarry level Good condition 75-100% completeness Easting: 984 Northing: 1001 Length: 250mm Width: 150mm
7269	Sauropoda indet.	Mygatt-Moore Quarry	vertebra	D-2005.6	Museums of Western Colorado	2005-07-29	vertebra Field notes have labelled this field number for MWC 5675 Field ID: assorted bone, dinosauria Low quarry level Good condition
7270	Sauropoda	Mygatt-Moore Quarry	tibia or radius distal end	D-2006.0117	Museums of Western Colorado	2006-06-22	tibia or radius distal end Field ID: long bone end, sauropod Fair condition Length: 20cm Field notes: 90cm due SE of distal end pointing S/ 980N; 990E
7271	Sauropoda	Mygatt-Moore Quarry	from bottom of large sacrum	FIC2011		1990-01-01	from bottom of large sacrum No field notes
7273	Apatosaurus sp.	Mygatt-Moore Quarry	last cervical or first dorsal vertebra	D-1997.1.1	Museums of Western Colorado	1997-07-24	last cervical or first dorsal Field ID: vertebra, cervical centrum, apatosaurus Bottom quarry level Poor condition 10% completeness Easting: 984 Northing: 1001 Field notes: crushed and beaten prior to burial
7274	Dinosauria	Mygatt-Moore Quarry	rib	D-2006.0117	Museums of Western Colorado	2006-07-21	rib Field ID: rib, dinosauria Duplicate field number with MWC 5891 and MWC 5906 High quarry level Good condition
7281	Sauropoda indet.	Mygatt-Moore Quarry	vertebral process	D-2009.0033	Museums of Western Colorado	2009-08-03	vertebral process Field ID: fragment, dinosauria High quarry level Good condition Easting: 985.8 Northing: 989.25
7282	Sauropoda	Mygatt-Moore Quarry	vertebra	FIC2011			Vertebrae No field notes
7283	Reptilia indet.	Mygatt-Moore Quarry	skin impression	FIC2011			skin or plant impression No field notes Slab marked in red, "no number (not MM787)"
7288	Sauropoda indet.	Mygatt-Moore Quarry	rib	D-2009.0033	Museums of Western Colorado	2009-07-31	rib Low quarry level Good condition Easting: 985.4 Northing: 986.25 Field notes: one of the bigger pieces from this quarry pit
7289	Sauropoda indet.	Mygatt-Moore Quarry	rib	2010	Museums of Western Colorado	2010-06-07	rib Low quarry level Fair condition Easting: 1002 Northing: 1022.5
7294	Theropoda indet.	Mygatt-Moore Quarry	distal caudal	D2007.0149	Museums of Western Colorado	2007-07-04	distal caudal Medium/low quarry level Fair/good condition Easting: 1003.75 Northing: 1020.75
7295	Dinosauria indet.	Mygatt-Moore Quarry	rib	D-2008.0065	Museums of Western Colorado	2008-06-10	rib fragment Poor/fair condition Easting: 1000.5 Northing: 1020.25
7296	Dinosauria indet.	Mygatt-Moore Quarry	rib fragment	2010	Museums of Western Colorado	2010-08-03	rib fragment Low quarry level Easting: 988.65 Northing: 990 Length: 28cm Width: 4.2cm Field notes: in ash
7297	Dinosauria indet.	Mygatt-Moore Quarry	Rib	D-2009.0033	Museums of Western Colorado	2009-08-14	rib fragment Low quarry level Good condition Easting: 989 Northing: 982.1 Field notes: It is wrapped in 2 section and there are arrows telling how they fit together.
7298	Sauropoda indet.	Mygatt-Moore Quarry	caudal	FIC2010			caudal vertebra No field notes
7299	Sauropoda indet.	Mygatt-Moore Quarry	phalanx	D-2008.0065	Museums of Western Colorado	2008-07-30	phalanx Medium quarry level Fair/good condition Easting: 1005.5 Northing: 1021.2
7300	Sauropoda indet.	Mygatt-Moore Quarry	caudal vertebra	D-2009.0033	Museums of Western Colorado	2009-08-05	caudal vertebra Low quarry level Good condition Easting: 986 Northing: 983
7301	Allosaurus sp.	Mygatt-Moore Quarry	gastralia	D-1999.6	Museums of Western Colorado	1999-08-05	gastralia Low quarry level Good condition 25% completeness Easting: 997.7 Northing: 1012.9 Length: 200mm Width: 10mm
7302	Allosaurus sp.	Mygatt-Moore Quarry	chevron	FIC2010	Museums of Western Colorado	1989-06-08	chevron No field notes
7303	Sauropoda? indet.	Mygatt-Moore Quarry	phalanx?, juvenile	D-2009.0033	Museums of Western Colorado	2009-06-12	phalanx?, small Medium quarry level Fair condition Field notes: juvenile
7304	Allosaurus sp.	Mygatt-Moore Quarry	vertebra	D-2009.0033	Museums of Western Colorado	2009-06-19	vertebra Medium quarry level Easting: 986.8 Northing: 985.6
7386	Vertebrata indet.	Mygatt-Moore Quarry	small bone	2010	Museums of Western Colorado	2010-06-23	small bone Field ID: small bone? plant, vertebrata Low quarry level, Fair condition Easting: 1003 Northing: 1021.75 Field notes: bone is really, really small and found near large vert.
7387	Vertebrata indet.	Mygatt-Moore Quarry	small vertebra	D-2009.0033	Museums of Western Colorado	2009-06-23	small vertebra High quarry level, Good condition Easting: 985 Northing: 985 Length: 1cm Width: 4mm Field notes: 1m S of 985E/985N
7392	Apatosaurus sp.	Mygatt-Moore Quarry	claw	D-2009.0033	Museums of Western Colorado	2009-07-31	claw Medium quarry level Good condition Easting: 984.9 Northing: 989.8
7393	Dinosauria indet.	Mygatt-Moore Quarry	rib	FIC2011			rib, fragment No field notes
7394	Dinosauria indet.	Mygatt-Moore Quarry	rib?	D-2009.0033	Museums of Western Colorado	2009-08-03	rib? Field ID: fragment, dinosaur Low quarry level Good condition Field notes: has a very round end, possibly a limb bone
7395	Reptilia indet.	Mygatt-Moore Quarry	proximal humerus?	2010	Museums of Western Colorado	2120-06-21	proximal humerus? Field ID: humerus, croc?, vertebrata Low quarry level Fair condition
7396	Allosaurus sp.	Mygatt-Moore Quarry	metacarpal?	D-2008.0065	Museums of Western Colorado	2008-07-31	metacarpal? High quarry level, Fair condition Easting: 1003.7 Northing: 1022 Field notes: 305, 5 degrees
7397	Sauropoda indet.	Mygatt-Moore Quarry	rib head	2010.01	Museums of Western Colorado	2010-08-13	rib head Field ID: rib (2), dinosauria Poor/fair condition Field notes: next to rotten vert (to the NE)
7398	Sauropoda indet.	Mygatt-Moore Quarry	rib	D-2009.0033	Museums of Western Colorado	2009-08-12	rib Low quarry level Easting: 987.2 Northing: 986.2 Field notes: Sauro
7399	Sauropoda	Mygatt-Moore Quarry	caudal vertebra	2010	Museums of Western Colorado	2009-09-17	caudal vertebra Low quarry level Fair/good condition Easting: 1001.9 Northing: 1022.3 Field notes: DNC fragments. Angled down NW at 10-15 degrees toward neural spine; right caudal rib squashed back and left forward.
7404	Sauropoda	Mygatt-Moore Quarry	cervical rib	D-2008.0065	Museums of Western Colorado	2008-07-22	cervical rib Medium/low quarry level Good/excellent condition Easting: 997 Northing: 1019 Field notes: has neural spine of jacket dorsal from last year
7411	Sauropoda	Mygatt-Moore Quarry	cervical vertebra	D-2008.0065	Museums of Western Colorado	2008-09-17	Cervical vertebra Low quarry level Fair condition Easting: 1000 Northing: 1020
7412	Allosaurus sp.	Mygatt-Moore Quarry	phalanx	D-1997.2.1	Dinamation International Society	1997-06-23	phalanx DIS tag: Allo. hand bone 25cm above Pebble bed Easting: 1001.75 Northing: 1012.8 Length: 10cm
7413	Allosaurus sp.	Mygatt-Moore Quarry	phalange	D-1998.1.1	Museums of Western Colorado	1998-08-06	phalange Low quarry level, Fair condition 75-100% completeness Easting: 993 Northing: 1010 Length: 9.0 Width: 2.5
7414	Allosaurus sp.	Mygatt-Moore Quarry	toe claw	D-1997.2.1	Dinamation International Society	1997-07-09	Toe claw In Pebble bed vertically Easting: 1001.7 Northing: 1012.5 Length: 10cm Width: 3cm
7415	Allosaurus sp.	Mygatt-Moore Quarry	phalanx	D-1997.2.1	Dinamation International Society	1997-07-28	phalanx Duplicate field number with MWC 7415 30cm above Pebble bed Easting: 995.2 Northing: 1012.85 Length: 5cm
7416	Allosaurus sp.	Mygatt-Moore Quarry	phalanx	D-1997.2.1	Dinamation International Society	1997-08-11	phalanx DIS tag: Allo toe bone Duplicate field number with MWC 7415 40cm above Pebble bed Easting: 995.2 Northing: 1012.85 Length: 5cm (width of specimen is greater that this 09/19)
7734	Allosaurus fragilis	Mygatt-Moore Quarry	right metatarsal 1	FIC2012			right metatarsal 1 No field notes
7735	Allosaurus sp.	Mygatt-Moore Quarry	metatarsal	D-1996.2.1	Dinamation International Society	1996-07-16	metatarsal Easting: 999.10 Northing: 1009.5 Field notes: bad shape
7984	Mymoorapelta maysi	Mygatt-Moore Quarry	Chevron	FIC2009	Museums of Western Colorado	1995-08-23	chevron Pebble bed Easting: 990.0 Northing: 1005.6
7985	Mymoorapelta maysi	Mygatt-Moore Quarry	rib	FIC2012			rib No field notes
8041	Apatosaurus sp.	Mygatt-Moore Quarry	tibia	2010	Museums of Western Colorado	2010-07-08	tibia, scores and other surface marks on condyles, with fragments "Tom's Tibia" Low quarry level Fair/good condition Easting: 988.5 Northing: 989.2
8042	Sauropoda indet.	Mygatt-Moore Quarry	ungual	2012	Museums of Western Colorado	2012-06-14	ungual Low quarry level Good condition Easting: 995.9 Northing: 1019.4 Field notes: stubby
8043	Sauropoda indet.	Mygatt-Moore Quarry	chevron	2012	Museums of Western Colorado	2011-08-26	chevron Medium/low quarry level Easting: 1002 Northing: 1023 Field notes: rib pieces found under chevron
8044	Mymoorapelta maysi	Mygatt-Moore Quarry	centrum	2010	Museums of Western Colorado	2010-08-19	centrum Poor condition Field notes: eroding out of back dirt pile
8046	Apatosaurus sp.	Mygatt-Moore Quarry	caudal vertebra	D-2008.0065	Museums of Western Colorado	2008-07-22	caudal vertebra Duplicate field number with MWC 7404 Field ID: caudal, cervical, spine, apatosaurus Medium/low quarry level Good/excellent condition Easting: 997 Northing: 1019
8047	Apatosaurus sp.	Mygatt-Moore Quarry	vertebra	2011	Museums of Western Colorado	2011-08-29	vertebra Field ID: caudal vert?, sauropoda Medium quarry level Fair condition Easting: 997.3 Northing: 1021.3
8048	Allosaurus sp.	Mygatt-Moore Quarry	phalange	2010	Museums of Western Colorado	2010-07-01	phalange Field ID: phalange?, dinosauria Low quarry level, Fair condition Easting: 1001.3 Northing: 1022.7 Field notes: on one end there are two clear articulation points for other bones but not sure what it is
8049	Apatosaurus sp.	Mygatt-Moore Quarry	caudal vertebra	D-2009.0033	Museums of Western Colorado	2009-08-03	caudal vertebra Low quarry level Good condition Easting: 989 Northing: 983.6
8053	Allosaurus sp.	Mygatt-Moore Quarry	phalanx?	2010	Museums of Western Colorado	2010-07-16	phalanx? Poor condition Field notes: weird shape
8054	Allosaurus sp.	Mygatt-Moore Quarry	phalanx?				distal end of a phalanx? or metacarpal? No field notes has neat red and white center on broken end 09/19
8055	Dinosauria indet.	Mygatt-Moore Quarry	bone fragment	2011	Museums of Western Colorado	2011-07-18	unknown bone fragment Field ID: fragment, dinosauria Easting: 1000 Northing: 1023 Field notes: interesting surfaces
8056	Sauropoda indet.	Mygatt-Moore Quarry	rib	D-2006.0117	Museums of Western Colorado	2006-06-21	rib Field ID: ?, dinosauria Low quarry level Poor condition Easting: 1005.3 Northing: 1013.8
8057	Dinosauria indet.	Mygatt-Moore Quarry	skull bone?	D-2006.0117	Museums of Western Colorado	2006-08-10	skull bone?, fragments No field notes Found low in the quarry N 1013.0 E 1005.0
8063	Sauropoda indet.	Mygatt-Moore Quarry	rib	2010	Museums of Western Colorado	2010-08-30	partial rib, large piece plus tray with fairly large piece and fragments Low quarry level Field notes: rib in trench around apato vert still being collected Notes are written on tray bottom with a diagram showing how and when collected. 12/19
8134	Dinosauria indet.	Mygatt-Moore Quarry	rib fragment	2011	Museums of Western Colorado	2011-08-26	rib fragment with two shallow but large tooth marks, worn Poor condition Easting: 996 Northing: 1021.9 Field notes: tooth marks (2); pre dep rounding.
8229	Dinosauria? indet.	Mygatt-Moore Quarry	skin impressions?	2011	Museums of Western Colorado	2011-08-24	skin impressions? Medium quarry level Poor/fair condition Easting: 1000.2 Northing: 1022.25
8231	Mymoorapelta maysi	Mygatt-Moore Quarry	osteoderm	2012	Museums of Western Colorado	2012-06-14	osteoderm High quarry level Excellent condition Easting: 998.2 Northing: 1023.1
8234	Apatosaurus sp.	Mygatt-Moore Quarry	cervical vertebra (tall neural spine)	D-2008.0065	Museums of Western Colorado	2008-01-01	cervical vertebra (tall neural spine) No field notes
8237	Mymoorapelta maysi	Mygatt-Moore Quarry	ungual				ungual No field notes
8264	Sauropoda indet.	Mygatt-Moore Quarry	neural spine	2015	Museums of Western Colorado	2015-07-08	partial neural spine of a sauropod (?Camarasaurus) in seven pieces Largest piece has a linear depressed fracture that likely originated post-mortem and fossilized in place.
8270	Allosaurus sp.	Mygatt-Moore Quarry	vertebra	2019	Museums of Western Colorado	2019-08-09	distal caudal vertebra with intact neural arch. Prezygopotheses are fragmented, but clearly show the tetanuran condition.
8286	Sauropoda	Mygatt-Moore Quarry	partial vertebral centrum, dorsal?		Museums of Western Colorado		partial vertebral centrum, dorsal? No field notes
8287	Dinosauria indet.	Mygatt-Moore Quarry	rib fragments		Museums of Western Colorado		rib fragments No field notes
8288	Dinosauria indet.	Mygatt-Moore Quarry	partially digested bone	2013	Museums of Western Colorado	2013-06-13	partially digested bone Field ID: conifer??, wood?? Low quarry level Poor condition Field notes: digested bone?
8289	Testudines indet.	Mygatt-Moore Quarry	metatarsal I, proximal fragment	2013	Museums of Western Colorado	2013-08-05	metatarsal I, proximal fragment Field ID: limb?, dinosaur Low quarry level Fair condition Easting: 983 Northing: 993
8290	Sauropoda indet.	Mygatt-Moore Quarry	vertebra fragment	2013	Museums of Western Colorado	2013-07-26	vertebra fragment Duplicate field number with MWC 8295 Field ID: ? vert frag, dinosauria Poor condition Easting: 981.5 Northing: 990.5
8291	Sauropoda	Mygatt-Moore Quarry	partial caudal vertebra	2012	Museums of Western Colorado	2014-06-14	partial caudal vertebra in jacket Duplicate field number with MWC 8312 Medium quarry level Good condition Easting: 995.9 Northing: 1019.6
8292	Dinosauria indet.	Mygatt-Moore Quarry	rib fragment	2014.01	Museums of Western Colorado	2014-07-11	rib fragment Medium quarry level Easting: 1003 Northing: 1024
8293	Sauropoda indet.	Mygatt-Moore Quarry	bone fragment	2012	Museums of Western Colorado	2012-07-13	bone fragment, found on clay layer Field ID: fragement, dinosauria Low quarry level, Good condition Easting: 985.4 Northing: 990.3 Field notes: right on the clay layer
8294	Dinosauria indet.	Mygatt-Moore Quarry	neural arch from vertebra	2013	Museums of Western Colorado	2013-08-05	neural arch fragment from vertebra - found on Pebble layer Low quarry level Poor condition Easting: 982.8 Northing: 988 Field notes: near other large bone element at Pebble layer
8295	Sauropoda indet.	Mygatt-Moore Quarry	vertebral fragment	2013	Museums of Western Colorado	2013-07-26	vertebral fragment - found on Pebble layer Duplicate field number with MWC 8290 Field ID: ? vert frag?, dinosaur. Poor condition. Easting: 981.5 Northing: 990.5 Field notes: on Pebble layer
8296	Theropoda indet.	Mygatt-Moore Quarry	terminal phalax of pes		Museums of Western Colorado		terminal phalax of pes (specimen tag says pedal ungual) No field notes
8297	Sauropoda indet.	Mygatt-Moore Quarry	rib fragment, ?cervical	2013	Museums of Western Colorado	2013-07-24	rib fragment, ?cervical - found in femur jacket trench (Specimen tag says "?vertebral arch fragment") Low quarry level Easting: 997.5 Northing: 1020.3 Field notes: in femur jacket trench
8302	Sauropoda indet.	Mygatt-Moore Quarry	partial rib	2014.01	Museums of Western Colorado	2014-06-11	partial rib Medium quarry level Poor condition Easting: 1000 Northing: 1024 Length: 30cm Width: 10cm
8303	Sauropoda indet.	Mygatt-Moore Quarry	partial chevron	2012	Museums of Western Colorado	2012-07-06	chevron, partial Low quarry level, Poor condition Easting: 984 Northing: 990 Field notes: partial (sketch)
8305	Dinosauria indet.	Mygatt-Moore Quarry	chevron	2013	Museums of Western Colorado	2013-07-22	chevron, worn, small fragment. Probably belongs to either Allosaurus or a large ornithischian, like Camptosaurus. Field ID: chevron, dinosaur Low quarry level, Poor condition Easting: 982 Northing: 988.5 Length: 8cm Width: 4cm Field notes: on Pebble layer
8306	Dinosauria indet.	Mygatt-Moore Quarry	bone fragments	2013	Museums of Western Colorado	2013-06-19	Bone fragments. Possible feeding traces on sufrace. Duplicate field number with MWC 8307 Low quarry level, Poor condition Easting: 982.5 Northing: 992.25 Field notes: possible tooth gouges
8307	Sauropoda indet.	Mygatt-Moore Quarry	cervical rib fragment (cervical vertebra fragment)	2013	Museums of Western Colorado	2013-07-26	cervical rib fragment (cervical vertebra fragment) Duplicate field number with MWC 8306. Field ID: flat bone elements, dinosaur. Low quarry level, Poor condition Easting: 982.5 Northing: 992.25 Field notes: possible tooth gouges
8308	Dinosauria indet.	Mygatt-Moore Quarry	small bone fragment	2013	Museums of Western Colorado	2013-06-19	small bone fragment with articulation surface present - vertebra? skull? jaw? Field ID: small vert frag, reptile Low quarry level Poor condition Easting: 982.2 Northing: 989.7
8309	Sauropoda indet.	Mygatt-Moore Quarry	partial neural spine	2014.01	Museums of Western Colorado	2014-07-11	partial neural spine Medium quarry level Fair condition Easting: 996 Northing: 1022 Field notes: broken upon removal
8310	Sauropoda indet.	Mygatt-Moore Quarry	cervical rib fragment	2013	Museums of Western Colorado	2013-06-27	cervical rib fragment Low quarry level Poor condition Length: 15cm Width: 7cm
8315	Sauropoda indet.	Mygatt-Moore Quarry	vertebral fragment (hyposphere)	2013	Museums of Western Colorado	2013-07-12	vertebral fragment (hyposphere) Low quarry level Easting: 982.75 Northing: 988.25 Field notes: in Pebble layer
8319	Theropoda indet.	Mygatt-Moore Quarry	distal caudal vertebrae, fused	2013	Museums of Western Colorado	2013-08-21	two fused caudals from the distal tail Low quarry level Fair condition Easting: 994.4 Northing: 990.5 Field notes: lying on clay layer
8320	Dinosauria indet.	Mygatt-Moore Quarry	skull fragment	2013	Museums of Western Colorado	2013-07-24	skull fragment, ?premaxilla Found above the Pebble layer. Low quarry level Fair condition Easting: 983 Northing: 988 Field notes: above pebble layer
8321	Sauropoda indet.	Mygatt-Moore Quarry	metatarsal	2013	Museums of Western Colorado	2013-06-03	metatarsal, small - possibly juvenile? Fair condition Easting: 981.6 Northing: 91.4 (?)
8329	Apatosaurus sp.	Mygatt-Moore Quarry	partial cervical rib	2014.01	Museums of Western Colorado	2014-08-04	partial cervical rib Medium quarry level Fair condition Easting: 995 Northing: 1019
8331	Sauropoda indet.	Mygatt-Moore Quarry	distal neural spine fragment	2012	Museums of Western Colorado	2012-08-21	distal neural spine fragment Medium quarry level Poor condition Easting: 1001.75 Northing: 1023.6
8333	Dinosauria indet.	Mygatt-Moore Quarry	?digested bone	2012	Museums of Western Colorado	2012-08-23	?digested bone Field ID: rib fragment or wood?, dinosauria or wood? High quarry level, Poor condition Easting: 998.1 Northing: 1023.75 Field notes: pre-burial break and wear; on thin edge (sketch)
8337	Allosaurus sp.	Mygatt-Moore Quarry	small lateral tooth	2013	Museums of Western Colorado		small lateral tooth No field notes
8345	Theropoda indet.	Mygatt-Moore Quarry	anterior dorsal vertebral centrum				anterior dorsal vertebral centrum, possibly Allosaurus or Ceratosaurus, prep label with field number was missing No field notes
8347	Dinosauria indet.	Mygatt-Moore Quarry	bone fragment	2013	Museums of Western Colorado	2013-06-21	bone fragment, probably from a vertebra, with potential bite marks Collected on the clay layer of the quarry floor. Low quarry level, Poor condition Easting: 981.75 Northing: 990 Field notes: on clay in quarry layer
8355	Apatosaurus sp.	Mygatt-Moore Quarry	right metacarpal I	2014.01	Museums of Western Colorado	2014-07-28	right metacarpal I Medium quarry level Good condition Easting: 995 Northing: 1020
8356	Apatosaurus sp.	Mygatt-Moore Quarry	metatarsal III	2014.01	Museums of Western Colorado	2014-07-25	metatarsal III High quarry level Good condition Easting: 997 Northing: 1023 Length: 10cm Width: 7cm
8362	Mymoorapelta maysi	Mygatt-Moore Quarry	osteoderm	2014.01	Museums of Western Colorado	2014-08-13	small oval osteoderm, slightly worn Medium quarry level Good condition Easting: 999 Northing: 1023 Length: 4cm Width: 4cm Field notes: vertical in quarry wall
8391	Apatosaurus	Mygatt-Moore Quarry	Metatarsal I and bone fragments (associated)	2012	Museums of Western Colorado	2012-08-16	Metatarsal I and bone fragments (associated) Medium quarry levell Good condition Easting: 1000 Northing: 1023.6
8392	Apatosaurus sp.	Mygatt-Moore Quarry	astragalus and vertebral fragment	2014.01	Museums of Western Colorado	2014-07-23	astragalus and vertebral fragment Field ID: astragulus?, vert process?, dinosauria, ?Camarasaurus Found under distal end of femur after removal. Low quarry level Good condition Easting: 996 Northing: 1021 Length: 18cm Width: 18cm Field notes: Under distal end of femur after removal. Possible extra seperate bone?
8399	Sauropoda indet.	Mygatt-Moore Quarry	Rib or limb	2013	Museums of Western Colorado	2013-08-21	Rib or limb fragment, found on the clay layer at the quarry floor. Low quarry level Poor condition Easting: 983.7 Northing: 990.2 Field notes: on clay layer
8403	Sauropoda indet.	Mygatt-Moore Quarry	cervical rib	2013	Museums of Western Colorado	2013-08-15	cervical rib fragment, poorly preserved Medium quarry level Fair condition Easting: 998 Northing: 1022.2
8404	Dinosauria indet.	Mygatt-Moore Quarry	zygaphophysis	2013	Museums of Western Colorado	2013-07-24	zygapophysis Medium quarry level Fair condition Easting: 983 Northing: 988 Field notes: above
8428	Apatosaurus sp.	Mygatt-Moore Quarry	scapho-lunar	2015	Museums of Western Colorado	2015-07-31	scapho-lunar, found near proximal ulna fragment Medium quarry level, Good condition Easting: 991.7 Northing: 1016.4 Length: 10cm Width: 7cm Field notes: found next to 2015 ulna on west wall
8429	Sauropoda indet.	Mygatt-Moore Quarry	rib fragment	2015	Museums of Western Colorado	2015-08-05	rib fragment Low quarry level, Excellent condition Easting: 1000.5 Northing: 1020.5 Width: 3cm Field notes: 2 pieces removed between field jacket 080315 and field jacket 081015
8432	Dinosauria indet.	Mygatt-Moore Quarry	rib or limb element				rib or limb bone fragment preserving bone surface modifications. Found in lab with no field number but it had a tag reading MMQ.
8448	Sauropoda	Mygatt-Moore Quarry	rib	2015	Museums of Western Colorado		rib Low quarry level Field notes: in eastern part of 2015 pit
8459	Sauropoda indet.	Mygatt-Moore Quarry	vertebra, partial neural spine	2015	Museums of Western Colorado	2015-07-31	partial neural spine, found in association with MWC 8430 Medium quarry level, Poor/fair condition Easting: 996.5 Northing: 1023.6 Length: 16cm Width: 8cm Field notes: found next to MMQ 1888- seed pod/weird, cool thing
8460	Sauropoda indet.	Mygatt-Moore Quarry	vertebra				vertebral fragment No field notes
8466	Sauropoda indet.	Mygatt-Moore Quarry	vertebral spine fragments	D-1995.1.1	Museums of Western Colorado	1991-06-06	vertebral spine fragments No field notes
8468	Sauropoda	Mygatt-Moore Quarry	rib	2015	Museums of Western Colorado	2015-08-05	dorsal rib, large removed from Large Bone Complex - part of Jacket 080315 No field number Field notes: contains multiple ribs
8498	Sauropoda indet.	Mygatt-Moore Quarry	caudal vertebra	2016	Museums of Western Colorado	2016-07-15	distal caudal vertebra with unfused neural arch and several punctures, fractures, and grooves indicating feeding by a predator on a juvenile
8500	Sauropoda indet.	Mygatt-Moore Quarry	vertebra	2016	Museums of Western Colorado	2016-08-12	vertebral arch fragment with scalloped breaks - teeth marks? - and fragment with surface marks
8501	Vertebrata indet.	Mygatt-Moore Quarry	bone fragments	2015	Museums of Western Colorado	2015-08-07	bone fragments with punctures and grooves (bite marks) and associated fragments Northing 1016.8 Easting 991.4
8502	Theropoda indet.	Mygatt-Moore Quarry	caudal vertebra	2015	Museums of Western Colorado	2015-08-10	Caudal vertebra with arch Northing 1012 Easting 990
8519	Diplodocidae	Mygatt-Moore Quarry	astragalus	2016	Museums of Western Colorado	2016-08-15	subadult astragalus
8520	Sauropoda indet.	Mygatt-Moore Quarry	metatarsal	2016	Museums of Western Colorado	2016-07-15	metatarsal, with pre-d. (?) fracture
8521	Sauropoda	Mygatt-Moore Quarry	dorsal rib	2016	Museums of Western Colorado	2016-07-11	rib fragment
8522	Sauropoda	Mygatt-Moore Quarry	limb fragment				limb fragment with bone surface modifications
8523	Dinosauria	Mygatt-Moore Quarry	rib				rib fragments
8524	Sauropoda	Mygatt-Moore Quarry	caudal vertebra	2015	Museums of Western Colorado	2015-02-24	caudal vertebra
8525	Sauropoda	Mygatt-Moore Quarry	cervical vertebra	2012	Museums of Western Colorado	2012-08-10	cervical vertebra
8543	Allosaurus sp.	Mygatt-Moore Quarry	metacarpal	2015	Museums of Western Colorado	2015-08-14	right first metacarpal, wonderful articular surfaces Northing: 1014.9 Easting: 991.7 Length: 6 cm Width: 6 cm
8545	Allosaurus sp.	Mygatt-Moore Quarry	caudal vertebra	D-2005.6	Museums of Western Colorado		distal caudal vertebra, neural arch is broken off
8546	Sauropoda indet.	Mygatt-Moore Quarry	vertebra	2016	Museums of Western Colorado	2016-06-06	vertebral process fragment - transverse process? Found by Rob Gay while excavating an Allosaur femur in the Pebble layer on the central wall. Northing: 1016-1015 Easting: 991-990
8557	Dinosauria indet.	Mygatt-Moore Quarry	vertebral fragment	2015	Museums of Western Colorado	2015-07-31	Vertebral fragment with possible surface marks Northing 1014 Easting 991
8558	Dinosauria indet.	Mygatt-Moore Quarry	rib fragment	2016	Museums of Western Colorado	2016-06-24	Rib fragment with scored groove Northing 1012-1013 Easting 989-990
8559	Sauropoda indet.	Mygatt-Moore Quarry	vertebral fragment	2014.01	Museums of Western Colorado	2014-06-27	vertebral fragment Northing 1021 Easting 996
8576	Dinosauria indet.	Mygatt-Moore Quarry	palate fragment	2014.01	Museums of Western Colorado	2014-08-13	palatal bone fragment (palatine or pterygoid?), found next to MMQ 1831 (Mymoorapelta scute) Northing 1023 Easting 999
8578	Sauropoda indet.	Mygatt-Moore Quarry	Vertebral process	2015	Museums of Western Colorado	2015-08-06	vertebral process fragments with pleurocoels and bone surface modifications - a series of grooves inset in broken bone fossilized in place Found near MMQ 1897 Northing 1012 Easting 990
8583	Thyreophora	Mygatt-Moore Quarry	osteoderm	D-2005.6	Museums of Western Colorado	2005-06-30	small osteoderm spine possibly from a juvenile Northing 977.9 Easting 997.5
8584	Apatosaurus sp.	Mygatt-Moore Quarry	femur	2014.01	Museums of Western Colorado	2014-07-17	Large Apatosaurus left femur, with fragments. Several punctures and grooves on posterior side of head, and many punctures near the adductor crest. Several other bones found in the jacket. Northing 1023-1021 Easting 995-997
8585	Camarasaurus sp.	Mygatt-Moore Quarry	caudal vertebra	D-2008.0065	Museums of Western Colorado	2008-09-23	Caudal vertebra neural spine and fragments. Found in pebble layer while trenching. Some surrounding matrix saved. Northing 1020.3 Easting 996.5
8586	Sauropoda indet.	Mygatt-Moore Quarry	bone fragment	2015	Museums of Western Colorado	2015-07-29	bone fragment with surface marks. Found associated with MMQ 1885 & 1887 Northing 1013 Easting 991
8587	Sauropoda indet.	Mygatt-Moore Quarry	sternal plate	2014.01	Museums of Western Colorado	2014-06-06	intersternal plate - edges are badly weathered It was found in a jacket with two cervical vertebrae. Northing 1022 Easting 1000
8590	Sauropoda indet.	Mygatt-Moore Quarry	vertebra	2015	Museums of Western Colorado	2015-07-29	?cervical vertebra fragments - excellent pleurocoels on one large fragment, would make an excellent teaching specimen
8591	Sauropoda indet.	Mygatt-Moore Quarry	vertebra	2016	Museums of Western Colorado	2013-06-06	vertebral fragments with multiple surface grooves Northing 1020-1021 Easting 990-991
8592	Sauropoda indet.	Mygatt-Moore Quarry	bone fragments	2015	Museums of Western Colorado	2015-07-29	Bone fragments with surface traces including a prominent hook score Associated with 1885 & 1886 Northing 1013 Easting 991
8600	Sauropoda indet.	Mygatt-Moore Quarry	vertebral process	2015	Museums of Western Colorado	2015-08-06	vertebral process in fragments - largest fragment has bone surface modifications Northing 1010 Easting 990
8625	Theropoda indet.	Mygatt-Moore Quarry	caudal vertebra	2016	Museums of Western Colorado	2016-06-06	partial caudal vertebral centrum, no neural arch preserved Northing 1017-1018 Easting 992-991
8627	Ornithischia? indet.	Mygatt-Moore Quarry	vertebra	2016	Museums of Western Colorado	2016-08-15	sacral vertebra with odd articulation facets Northing 1020-1021 Easting 990-991
8649	Caudata indet.	Mygatt-Moore Quarry	distal limb element	2017.01	Museums of Western Colorado	2017-06-12	Distal limb element preserved as part and counterpart, found approximately 2 feet above the diplodocid skull and neck. Element is complete, showing a pronounced concavity on the surface medial within the limb. Condyles are not ossified as is typical of aquatic and semiaquatic amphibians.
8671	cf. Opisthias sp.	Mygatt-Moore Quarry	dentary with five teeth	2017.01	Museums of Western Colorado	2017-06-26	very small, fragmentary dentary with five teeth in situ - no preservation of mesial or distal ends Found high in the horizon, approximately 1 meter above the Pebble layer. Resembles Opisthias and juvenile Eilenodon (with unworn teeth)
8672	Sauropoda	Mygatt-Moore Quarry	fibula	D-2000.3	Museums of Western Colorado	2000-06-15	Fibula good condition Easting: 1002.75 Northing: 1014.6 Field notes: triangular bone, fairly thin, maybe poart of very large rib head?
8675	Allosaurus sp.	Mygatt-Moore Quarry	dorsal vertebral centrum	2016	Museums of Western Colorado	2016-08-17	dorsal vertebral centrum, no neural arch or processes preserved striated tooth marks Northing 1017-1018 Easting 990-991
8680	Mymoorapelta maysi	Mygatt-Moore Quarry	osteoderm	2016	Museums of Western Colorado	2016-07-13	oval body osteroderm with series of punctures on the dorsal surface- theropod bite? Northing 1020-1021 Easting 990-991
8681	Sauropoda indet.	Mygatt-Moore Quarry	cervical rib	2015	Museums of Western Colorado	2015-08-14	anterior cervical rib, with surface marks? Found near MMQ 1907 Northing 1016.8 Easting 991.2
8689	Dinosauria indet.	Mygatt-Moore Quarry	vertebra	2016	Museums of Western Colorado	2016-06-03	Vertebral process fragment, with punctures and scores Northing 1012-1013 Easting 988-989
8691	Diplodocidae indet.	Mygatt-Moore Quarry	skull fragment with teeth				Skull fragment, worn and etched, tooth-bearing, from a diplodocid - possibly either a maxilla or premaxilla fragment, not dentary. No field number attached to specimen - originally described as a conifer cone. Clearly not a conifer cone, spongy bone tissue and diplodocid teeth are visible on the surface.
8692	Sauropoda indet.	Mygatt-Moore Quarry	bone fragment	2017.01	Museums of Western Colorado	2017-07-21	Bone fragment, with scores and other surface marks Northing 1015-1016 Easting 992-993
8693	Othnielia sp.	Mygatt-Moore Quarry	cervical rib	2017.01	Museums of Western Colorado	2017-06-12	small cervical rib Northing 1014-1015 Easting 992-993
8695	Sauropoda indet.	Mygatt-Moore Quarry	vertebra	2016	Museums of Western Colorado	2017-06-15	Vertebral process fragment, with multiple scores Northing 1016-1017 Easting 990-991
8696	Sauropoda indet.	Mygatt-Moore Quarry	rib	2016	Museums of Western Colorado	2016-08-17	dorsal rib head, proximal rib, fragments, with scores Northing 1018-1019 Easting 991-992
8697	Theropoda indet.	Mygatt-Moore Quarry	phalanx	2016	Museums of Western Colorado	2016-06-13	proximal phalanx, small - manus? Found next to coracoid jacket near Allosaur femora (1962 & 1964) Northing 1013-1014 Easting 990-989
8698	Allosaurus sp.	Mygatt-Moore Quarry	carpal	2016	Museums of Western Colorado	2016-06-27	Carpal 1 Found in wall above the skull jacket (1934) Northing 1017-1018 Easting 990-991
8699	Dinosauria indet.	Mygatt-Moore Quarry	bone fragment	2017.01	Museums of Western Colorado	2017-07-14	Bone fragment, with surface marks Northing 1017-1018 Easting 992-993
8700	Dinosauria indet.	Mygatt-Moore Quarry	bone fragment	2017.01	Museums of Western Colorado	2017-06-28	Bone fragment, with many surface marks (scores) Northing 1020-1021 Easting 992-993
8701	Dinosauria indet.	Mygatt-Moore Quarry	bone fragment	2017.01	Museums of Western Colorado	2017-08-14	Bone fragment, with numerous parallel grooves and surface marks Found near MMQ 2043 Northing 1019-1020 Easting 992-993
8702	Dinosauria indet.	Mygatt-Moore Quarry	bone fragment	2015	Museums of Western Colorado	2015-08-14	Bone fragment with numerous parallel grooves & surface marks Northing 1024.1 Easting 1000.1
8703	Sauropoda indet.	Mygatt-Moore Quarry	bone fragment	D-2002.6	Museums of Western Colorado	2002-07-11	Bone fragment with numerous parallel grooves & surface marks Northing 1016.2 Easting 1000.4
8705	Sauropoda	Mygatt-Moore Quarry	caudal vertebra		Museums of Western Colorado	2007-06-19	distal caudal vertebra. left side appears to have some surface marks along breakage lines - feeding? trampling? Northing: 1019.5 Easting: 997.25
8707	Theropoda indet.	Mygatt-Moore Quarry	dorsal rib	2017.01	Museums of Western Colorado	2017-06-21	proximal rib fragment with sufrace mark (groove) along shaft. Found near distal end of theropod femur and near MMQ 1997 & 1998 (teeth) Northing 1015-1016 Easting: 993-994
8708	Allosaurus sp.	Mygatt-Moore Quarry	metatarsal II	2017.01	Museums of Western Colorado	2017-06-12	Right Metatarsal II with excellent articulation facets. Found in concretion ~15cm from the distal end of a Allosaur femur along the central wall, between it and the coracoid jacket. Same individual? (originally Field IDed as a sauropod chevron) Northing 1014-1015 Easting: 993-994
8709	Dinosauria	Mygatt-Moore Quarry	dorsal rib	2015	Museums of Western Colorado	2015-06-10	dorsal rib fragment, no head or distal ends - could be any large dinosaur. Found in east big pit in the SW corner near jacket Northing 1022 Easting: 998
8712	Sauropoda indet.	Mygatt-Moore Quarry	rib	2016	Museums of Western Colorado	2016-06-03	Rib fragment, with puncture mark, not found in situ Northing 1012-1013 Easting 988-989
8713	Dinosauria indet.	Mygatt-Moore Quarry	rib	2016	Museums of Western Colorado		Rib fragment with numerous grooves and a row grooves inside of a row of breaks Unknown field number
8714	Theropoda indet.	Mygatt-Moore Quarry	phalanx	2017.01	Museums of Western Colorado	2017-08-11	partial small phalanx found next to MMQ 2044 (theropod vertebra) Northing 1016-1017 Easting: 992-993
8717	Allosaurus sp.	Mygatt-Moore Quarry	chevron	2017.01	Museums of Western Colorado	2017-07-28	chevron in fragments Northing 1015-1016 Easting: 992-993
8718	Sauropoda indet.	Mygatt-Moore Quarry	vertebral neural arch	2017.01	Museums of Western Colorado	2017-06-12	dorsal tip of neural spine from a vertebra Northing 1018-1019 Easting 992-993
8719	Sauropoda	Mygatt-Moore Quarry	limb fragment	2017.01	Museums of Western Colorado	2017-08-14	large limb fragment containing multiple grooves Northing 1019-1020 Easting 992-993
8720	Sauropoda	Mygatt-Moore Quarry	rib	2015	Museums of Western Colorado	2015-08-05	large rib head Northing 1017.3 Easting 991.2
8722	Allosaurus sp.	Mygatt-Moore Quarry	chevron	2017.01	Museums of Western Colorado	2017-07-21	chevron Northing 1017 Easting 1018
8723	Sauropoda indet.	Mygatt-Moore Quarry	vertebral processes	2017.01	Museums of Western Colorado		Vertebral processes, in 3 pieces with grooves on a smaller piece. Found between 2043 and 2044.
8725	Sauropoda indet.	Mygatt-Moore Quarry	rib	2015	Museums of Western Colorado	2015-08-05	Proximal dorsal rib fragment in 3 large pieces plus 70+ fragments. One piece with groves. Found in east pit (="Big Pit"). Northing: 1020.5 Easting: 1000.4
8757	Sauropoda indet.	Mygatt-Moore Quarry	vertebral centrum				partial vertebral centrum found in collections - great presentation of honeycomb internal structure - probably from MMQ, moved to Teaching Collections cabinet.
8769	Sauropoda indet.	Mygatt-Moore Quarry	vertebral fragments	2015	Museums of Western Colorado	2015-07-31	vertebral fragments with several fragments containing bone surface modifications - grooves in particular Northing 1011.2 Easting: 990.2
8773	Allosaurus sp.	Mygatt-Moore Quarry	vertebra	2017.01	Museums of Western Colorado	2017-07-17	Dorsal or proximal caudal vertebra in fragments. Found immediately beside the anterior end of the Allosaurus femur (MMQ 1962) along the back wall of the pit. Northing: 1014-1015 Easting: 992-993
8774	Sauropoda indet.	Mygatt-Moore Quarry	vertebra	2015	Museums of Western Colorado	2015-07-22	Vertebral process fragment with several punctures in a row on the largest fragment Northing: 1013 Easting: 990
8775	Sauropoda indet.	Mygatt-Moore Quarry	rib	2016	Museums of Western Colorado	2016-08-12	Rib fragments with possible surface marks. Found below MMQ 1957 and next to MMQ 1956. Northing: 1020-1021 Easting: 990-991
8782	Sauropoda indet.	Mygatt-Moore Quarry	vertebral fragment	2014.01	Museums of Western Colorado	2014-08-15	vertebral fragment - ?transverse process - preserves a large, triangular puncture
8783	Dinosauria indet.	Mygatt-Moore Quarry	bone fragment	2014.01	Museums of Western Colorado	2014-08-11	flat bone fragment with scores on convex surface
8784	Dinosauria indet.	Mygatt-Moore Quarry	rib fragments				rib fragments - with scores
8785	Sauropoda indet.	Mygatt-Moore Quarry	rib fragment	2015	Museums of Western Colorado	2015-08-05	Large sauropod dorsal rib, distal fragment Rib was removed prior to the collection of the large jacket (080315 - Big Pit main jacket) containing its remaining fragments. Rib was divided during collection in order to create breaks between jackets within the pit.
8786	Allosaurus sp.	Mygatt-Moore Quarry	caudal vertebra	2017.01	Museums of Western Colorado	2017-08-11	large proximal caudal centrum, neural arch is not preserved. Insect damage is present at base of arch. Found in concretion layer next to MMQ 2019, an allosaurus femur - ?associated
8792	Theropoda indet.	Mygatt-Moore Quarry	phalanx	2017.01	Museums of Western Colorado	2017-08-11	dorsoventrally compressed distal phalanx Found in jacket MMQ 2019, an allosaurus femur
8798	Crocodylomorpha indet.	Mygatt-Moore Quarry	bone fragment	2018	Museums of Western Colorado	2018-06-08	fragment of sculptured bone
8800	Sauropoda indet.	Mygatt-Moore Quarry	tarsal, calcaneum	2016	Museums of Western Colorado	2016-08-08	calcaneum, weathered, in multiple pieces Found by visiting Road Scholar, removed from quarry before mapped... exact location is estimated.
8801	Vertebrata indet.	Mygatt-Moore Quarry	bone fragment	2018	Museums of Western Colorado	2018-06-20	worn bone fragment with BSM (groove)
8802	Vertebrata indet.	Mygatt-Moore Quarry	bone fragments	2016	Museums of Western Colorado		Bone fragments, collected in 2016 from the "eastern big pit" (Nugget Bucket bone) See annual BLM reports for description on the "eastern big pit"
8803	Vertebrata indet.	Mygatt-Moore Quarry	bone fragments	2017.01	Museums of Western Colorado		Bone fragments, collected in 2017 from the eastern wall (Nugget Bucket bone)
8804	Vertebrata indet.	Mygatt-Moore Quarry	bone fragments	2016	Museums of Western Colorado		Bone fragments, collected in 2016 from the central wall (Nugget Bucket bone)
8805	Vertebrata indet.	Mygatt-Moore Quarry	bone fragments	2017.01	Museums of Western Colorado		Bone fragments with surface marks, collected in 2017 from the eastern wall (Nugget Bucket bone) "Box 2, Rock 1"
8806	Vertebrata indet.	Mygatt-Moore Quarry	bone fragment	2017.01	Museums of Western Colorado		Bone fragment with surface marks, collected in 2017 from the eastern wall (Nugget Bucket bone) "Box 2, Rock 2"
8807	Vertebrata indet.	Mygatt-Moore Quarry	bone fragments	2017.01	Museums of Western Colorado		Bone fragments, collected in 2017 from the central wall (Nugget Bucket bone) some printed tags indicated surface marks (?) (fragments in 7 trays plus one large piece of matrix with bone fragments)
8808	Vertebrata indet.	Mygatt-Moore Quarry	bone fragment	2016	Museums of Western Colorado		Bone fragment with surface marks, collected in 2016 from the "eastern big pit" (Nugget Bucket bone) See annual BLM reports for description on the "eastern big pit" "Box 1, Rock 1"
8809	Vertebrata indet.	Mygatt-Moore Quarry	bone fragment	2016	Museums of Western Colorado		Bone fragment with surface marks, collected in 2016 from the "eastern big pit" (Nugget Bucket bone) See annual BLM reports for description on the "eastern big pit" "Box 1, Rock 3"
8810	Vertebrata indet.	Mygatt-Moore Quarry	bone fragment	2016	Museums of Western Colorado		Bone fragment with surface marks, collected in 2016 from the "eastern big pit" (Nugget Bucket bone) See annual BLM reports for description on the "eastern big pit" "Box 1, Rock 4"
8811	Vertebrata indet.	Mygatt-Moore Quarry	bone fragment	2016	Museums of Western Colorado		Bone fragment with surface marks, collected in 2016 from the central wall (Nugget Bucket bone) "Box 3, Rock 1"
8812	Vertebrata indet.	Mygatt-Moore Quarry	bone fragment	2016	Museums of Western Colorado		Bone fragment with surface marks, collected in 2016 from the central wall (Nugget Bucket bone) "Box 3, Rock 2"
8813	Vertebrata indet.	Mygatt-Moore Quarry	bone fragment	2016	Museums of Western Colorado		Bone fragment with surface marks, collected in 2016 from the central wall (Nugget Bucket bone) "Box 3, Rock 3"
8814	Vertebrata indet.	Mygatt-Moore Quarry	bone fragment	2016	Museums of Western Colorado		Bone fragment with surface marks, collected in 2016 from the central wall (Nugget Bucket bone) "Box 3, Rock 4"
8815	Vertebrata indet.	Mygatt-Moore Quarry	bone fragment	2016	Museums of Western Colorado		Bone fragment with surface marks, collected in 2016 from the central wall (Nugget Bucket bone) "Box 3, Rock 6"
8816	Vertebrata indet.	Mygatt-Moore Quarry	bone fragment	2016	Museums of Western Colorado		Bone fragment with surface marks, collected in 2016 from the central wall (Nugget Bucket bone) "Box 3, Rock 7"
8817	Vertebrata indet.	Mygatt-Moore Quarry	bone fragment	2016	Museums of Western Colorado		Bone fragment with surface marks, collected in 2016 from the central wall (Nugget Bucket bone) "Box 3, Rock 8"
8818	Vertebrata indet.	Mygatt-Moore Quarry	bone fragment	2017.01	Museums of Western Colorado		Bone fragment with surface marks, collected in 2017 from the central wall (Nugget Bucket bone) "Box 4, Rock 1"
8819	Vertebrata indet.	Mygatt-Moore Quarry	bone fragment	2017.01	Museums of Western Colorado		Bone fragment with surface marks, collected in 2017 from the central wall (Nugget Bucket bone) "Box 4, Rock 2"
8820	Vertebrata indet.	Mygatt-Moore Quarry	bone fragment	2017.01	Museums of Western Colorado		Bone fragment with surface marks, collected in 2017 from the central wall (Nugget Bucket bone) "Box 4, Rock 3"
8821	Vertebrata indet.	Mygatt-Moore Quarry	bone fragment	2017.01	Museums of Western Colorado		Bone fragment with surface marks, collected in 2017 from the central wall (Nugget Bucket bone) "Box 4, Rock 4"
8822	Vertebrata indet.	Mygatt-Moore Quarry	bone fragment	2017.01	Museums of Western Colorado		Bone fragment with surface marks, collected in 2017 from the central wall (Nugget Bucket bone) "Box 4, Rock 5"
8823	Vertebrata indet.	Mygatt-Moore Quarry	bone fragment	2017.01	Museums of Western Colorado		Bone fragment with surface marks, collected in 2017 from the central wall (Nugget Bucket bone) "Box 4, Rock 6"
8824	Vertebrata indet.	Mygatt-Moore Quarry	bone fragment	2017.01	Museums of Western Colorado		Bone fragment with surface marks, collected in 2017 from the central wall (Nugget Bucket bone) "Box 4, Rock 7"
8825	Vertebrata indet.	Mygatt-Moore Quarry	bone fragment	2017.01	Museums of Western Colorado		Bone fragment with surface marks, collected in 2017 from the central wall (Nugget Bucket bone) "Box 4, Rock 8"
8826	Vertebrata indet.	Mygatt-Moore Quarry	bone fragment	2017.01	Museums of Western Colorado		Bone fragment with surface marks, collected in 2017 from the central wall (Nugget Bucket bone) "Box 4, Rock 9"
8827	Vertebrata indet.	Mygatt-Moore Quarry	bone fragment	2017.01	Museums of Western Colorado		Bone fragment with surface marks, collected in 2017 from the central wall (Nugget Bucket bone) "Box 5"
8828	Vertebrata indet.	Mygatt-Moore Quarry	bone fragment	2017.01	Museums of Western Colorado		Bone fragment with surface marks, collected in 2017 from the central wall (Nugget Bucket bone) "Box 6"
8897	Vertebrata indet.	Mygatt-Moore Quarry	bone fragment	2018	Museums of Western Colorado		Bone fragment with curved score - collected in 2018 from the eastern wall (nugget bucket) "Box 3, Rock 1"
8898	Vertebrata indet.	Mygatt-Moore Quarry	bone fragment	2018	Museums of Western Colorado		Bone fragment with score - collected in 2018 from the central wall (nugget bucket) "Box 1, Rock 1"
8899	Vertebrata indet.	Mygatt-Moore Quarry	bone fragment	2018	Museums of Western Colorado		Bone fragment with multiple scores - collected in 2018 from the central wall (nugget bucket) "Box 1, Rock 2"
8900	Vertebrata indet.	Mygatt-Moore Quarry	bone fragment	2018	Museums of Western Colorado		Bone fragment with score - collected in 2018 from the central wall (nugget bucket) "Box 1, Rock 3"
8901	Vertebrata indet.	Mygatt-Moore Quarry	bone fragment	2018	Museums of Western Colorado		Bone fragment with multiple scores - collected in 2018 from the central wall (nugget bucket) "Box 1, Rock 4"
8902	Vertebrata indet.	Mygatt-Moore Quarry	bone fragment	2018	Museums of Western Colorado		Bone fragment with serial scores - collected in 2018 from the central wall (nugget bucket) "Box 1, Rock 5"
8903	Vertebrata indet.	Mygatt-Moore Quarry	bone fragment	2018	Museums of Western Colorado		Bone fragment with score - collected in 2018 from the central wall (nugget bucket) "Box 1, Rock 7"
8904	Vertebrata indet.	Mygatt-Moore Quarry	bone fragment	2018	Museums of Western Colorado		Bone fragment with serial scores - collected in 2018 from the central wall (nugget bucket) "Box 1, Rock 8"
8905	Vertebrata indet.	Mygatt-Moore Quarry	bone fragment	2018	Museums of Western Colorado		Bone fragment with serial scores - collected in 2018 from the central wall (nugget bucket) "Box 1, Rock 9"
8906	Vertebrata indet.	Mygatt-Moore Quarry	bone fragment	2018	Museums of Western Colorado		Bone fragment with scores - collected in 2018 from the central wall (nugget bucket) "Box 1, Rock 10"
8907	Vertebrata indet.	Mygatt-Moore Quarry	bone fragment	2018	Museums of Western Colorado		Bone fragment with score - collected in 2018 from the central wall (nugget bucket) "Box 1, Rock 11"
8908	Vertebrata indet.	Mygatt-Moore Quarry	bone fragment	2018	Museums of Western Colorado		Bone fragment with score - collected in 2018 from the central wall (nugget bucket) "Box 1, Rock 12"
8909	Vertebrata indet.	Mygatt-Moore Quarry	bone fragment	2018	Museums of Western Colorado		Bone fragment with pitting (insect traces) - collected in 2018 from the central wall (nugget bucket) "Box 1, Rock 13"
8910	Vertebrata indet.	Mygatt-Moore Quarry	bone fragment	2018	Museums of Western Colorado		Bone fragment with score - collected in 2018 from the central wall (nugget bucket) "Box 2, Rock 1"
8911	Vertebrata indet.	Mygatt-Moore Quarry	bone fragment	2018	Museums of Western Colorado		Bone fragment with scores - collected in 2018 from the central wall (nugget bucket) "Box 2, Rock 2"
8912	Vertebrata indet.	Mygatt-Moore Quarry	bone fragment	2018	Museums of Western Colorado		Bone fragment with serial scores - collected in 2018 from the central wall (nugget bucket) "Box 2, Rock 3"
8913	Vertebrata indet.	Mygatt-Moore Quarry	bone fragment	2018	Museums of Western Colorado		Bone fragment with score - collected in 2018 from the central wall (nugget bucket) "Box 2, Rock 5"
8914	Vertebrata indet.	Mygatt-Moore Quarry	bone fragment	2018	Museums of Western Colorado		Bone fragment with faint score - collected in 2018 from the central wall (nugget bucket) "Box 2, Rock 6"
8915	Vertebrata indet.	Mygatt-Moore Quarry	bone fragment	2018	Museums of Western Colorado		Bone fragment with curved score - collected in 2018 from the central wall (nugget bucket) "Box 2, Rock 7"
8916	Vertebrata indet.	Mygatt-Moore Quarry	bone fragment	2018	Museums of Western Colorado		Bone fragment with narrow score - collected in 2018 from the central wall (nugget bucket) "Box 2, Rock 8"
8917	Vertebrata indet.	Mygatt-Moore Quarry	bone fragment	2018	Museums of Western Colorado		Bone fragment with scores - collected in 2018 from the central wall (nugget bucket) "Box 2, Rock 9"
8918	Vertebrata indet.	Mygatt-Moore Quarry	bone fragment	2018	Museums of Western Colorado		Bone fragment with score - collected in 2018 from the central wall (nugget bucket) "Box 2, Rock 11"
8919	Vertebrata indet.	Mygatt-Moore Quarry	bone fragment	2018	Museums of Western Colorado		Bone fragment with score - collected in 2018 from the central wall (nugget bucket) "Box 2, Rock 12" in matrix
8920	Vertebrata indet.	Mygatt-Moore Quarry	bone fragment	2018	Museums of Western Colorado		Bone fragment with score - collected in 2018 from the central wall (nugget bucket) "Box 2, Rock 13"
8921	Vertebrata indet.	Mygatt-Moore Quarry	bone fragment	2018	Museums of Western Colorado		Bone fragment with score - collected in 2018 from the central wall (nugget bucket) "Box 2, Rock 14"
8922	Vertebrata indet.	Mygatt-Moore Quarry	bone fragment	2018	Museums of Western Colorado		Bone fragment with curved score - collected in 2018 from the central wall (nugget bucket) "Box 2, Rock 15" in matrix
8923	Vertebrata indet.	Mygatt-Moore Quarry	bone fragment	2018	Museums of Western Colorado		Bone fragment with score - collected in 2018 from the central wall (nugget bucket) "Box 2, Rock 16"
8924	Vertebrata indet.	Mygatt-Moore Quarry	bone fragment	2018	Museums of Western Colorado		Bone fragment with multiple overlapping scores - collected in 2018 from the central wall (nugget bucket) "Box 2, Rock 17"
8925	Vertebrata indet.	Mygatt-Moore Quarry	bone fragment	2018	Museums of Western Colorado		Bone fragment with pits - collected in 2018 from the central wall (nugget bucket) "Box 2, Rock 18"
8926	Vertebrata indet.	Mygatt-Moore Quarry	bone fragment	2018	Museums of Western Colorado		Bone fragment with scores - collected in 2018 from the central wall (nugget bucket) "Box 2, Rock 19"
8927	Vertebrata indet.	Mygatt-Moore Quarry	bone fragments	2018	Museums of Western Colorado		Bone fragments collected in 2018 from the central wall (nugget bucket) 135+ fragments in 3 trays (one tray contains 5 gastropods HES 12/19)
8945	Dinosauria indet.	Mygatt-Moore Quarry	ribs, vertebrae				Rib and vertebra fragments in concretion
8947	Dinosauria indet.	Mygatt-Moore Quarry	rib		Museums of Western Colorado		rib fragment, collected by J.D. Moore in 1985
8948	Sauropoda indet.	Mygatt-Moore Quarry	vertebra	2018	Museums of Western Colorado	2018-07-30	Vertebral fragment (transverse process?) preserving multiple bone surface modifications, including multiple punctures and serial scores
8949	Sauropoda indet.	Mygatt-Moore Quarry	bone fragment	2017.01	Museums of Western Colorado	2017-07-31	bone fragment (vertebra?) preserving striated scores
8950	Dinosauria indet.	Mygatt-Moore Quarry		2018	Museums of Western Colorado		flat bone fragment with several scores
8952	Sauropoda indet.	Mygatt-Moore Quarry	rib	2017.01	Museums of Western Colorado	2017-08-16	Distal rib fragment, with scores on shaft near proximal break, and a puncture on the distal edge, where the cortical bone stops.
8962	Allosaurus fragilis	Mygatt-Moore Quarry	pubis	2018	Museums of Western Colorado	2018-06-18	near complete left pubis, found in contact with MWC 8963 (right pubis). Identified in the field as two limb bones, but after prepared in the lab, it was obvious these "limbs" were the partial pelvis of an Allosaur. While separating the 2075 block in the field, some chunks of one of the pubes were incoporated into another jacket. They have been reunited in the lab. There is pitted insect damage ne…
8963	Allosaurus fragilis	Mygatt-Moore Quarry	pubis	2018	Museums of Western Colorado	2018-06-18	near complete right pubis, found in contact with MWC 8962 (left pubis). Identified in the field as two limb bones, but after prepared in the lab, it was obvious these "limbs" were the partial pelvis of an Allosaur. While separating the 2075 block in the field, some chunks of one of the pubes were incoporated into another jacket (MMQ 2041). They have been reunited in the lab.
8964	Dinosauria indet.	Mygatt-Moore Quarry	Rib	2014.01	Museums of Western Colorado	2014-07-02	rib fragment with groove
8966	Dinosauria indet.	Mygatt-Moore Quarry	Rib	2014.01	Museums of Western Colorado	2014-08-08	rib fragment with groove (oriented longitudinally)
8968	Sauropoda indet.	Mygatt-Moore Quarry	vertebral fragment, possible condyle	2018	Museums of Western Colorado	2018-07-16	Vertebral fragment or possible condyle with 11 subcircular, shallow bore holes that are clustered on two concave surfaces of the fragment.
8969	Reptilia indet.	Mygatt-Moore Quarry	rib fragments	D-2006.0117	Museums of Western Colorado	2006-07-14	rib fragments, very small, rhynchocephalian? baby dino? Found in jacket with Apato vertebrae
8972	Dinosauria indet.	Mygatt-Moore Quarry	bone fragments		Museums of Western Colorado		bone fragments, collected by J.D. Moore in 1982 (including a small piece of a Glyptops costal, MWC 8973)
8973	Glyptops sp.	Mygatt-Moore Quarry	costal fragment		Museums of Western Colorado		small piece of a Glyptops costal, collected by J.D. Moore in 1982, along with miscellaneous bone fragments (MWC 8972)
8975	Sauropoda indet.	Mygatt-Moore Quarry	vertebra	2018	Museums of Western Colorado	2018-07-25	Vertebral fragment, with rectangular shaped insect bore hole
8999	Dinosauria indet.	Mygatt-Moore Quarry	gastralia				Gastralia rib fragments (5 pieces), from "old water works 11/04"
9000	Sauropoda indet.	Mygatt-Moore Quarry	Cervical vertebra		Dinamation International Society	1988-09-22	Tip of cervical vertbra - collected from near FS-MSQ-31 (FS-MSQ-33) in numerous pieces
9001	Sauropoda indet.	Mygatt-Moore Quarry	vertebral fragments				vertebral fragments Kay's cervical? Pebble layer in numerous pieces
9002	Theropoda indet.	Mygatt-Moore Quarry	gastralia		Dinamation International Society	1990-07-31	gastralia with score "Jacket 4"
9003	Sauropoda indet.	Mygatt-Moore Quarry	rib fragments				rib fragments - scores on flat piece
9004	Sauropoda indet.	Mygatt-Moore Quarry	bone fragments				bone fragments - some insect damage "surface scrap from backhoe"
9005	Dinosauria indet.	Mygatt-Moore Quarry	bone fragments				bone fragments -scores on largest fragment
9006	Sauropoda indet.	Mygatt-Moore Quarry	chevron				chevron
9007	Sauropoda indet.	Mygatt-Moore Quarry	rib fragment				rib fragment - scores near center
9008	Dinosauria indet.	Mygatt-Moore Quarry	bone fragments				bone fragments - serrations on largest piece "scute? Morrison/pond M + M Roger 7-7-91"
9009	Sauropoda indet.	Mygatt-Moore Quarry	vertebral fragments				vertebral fragments, with scores
9010	Sauropoda indet.	Mygatt-Moore Quarry	rib fragment				rib fragment, with scores on convex surface
9011	Dinosauria indet.	Mygatt-Moore Quarry	gastralia fragments				gastralia fragments "small rib pieces, near Field Number 694"
9012	Dinosauria indet.	Mygatt-Moore Quarry	bone fragment				bone fragment "Saur. Tooth"
9013	Sauropoda indet.	Mygatt-Moore Quarry	rib fragment				rib fragment
9014	Sauropoda indet.	Mygatt-Moore Quarry	vertebral fragments				vertebral fragments with deep furrows "MMQ 30"
9015	Sauropoda indet.	Mygatt-Moore Quarry	bone fragments				bone fragments
9016	Sauropoda indet.	Mygatt-Moore Quarry	bone and rib fragments				bone and rib fragments "rib head, anterior dorsal" "incl. MWC 7274" "this frag may belong...vert found just N of 1225"
9017	Dinosauria indet.	Mygatt-Moore Quarry	distal rib				distal rib- possilble furrows "Britt girls"
9018	Sauropoda indet.	Mygatt-Moore Quarry	veterbral fragments		Dinamation International Society		vertebral fragments-scores "pit 2" "Right Radius 755 mm" "Right Humerus 1120 mm" Collected in 1990 "Coracoid 9-21-88" "FS-MSQ-21" "Adjacent to SE-Side of FS-MSQ3"
9019	Sauropoda indet.	Mygatt-Moore Quarry					Neural spine tip- insect damage inside pleurocoel Spine frag (Species unknown) Femur 994E-978N Vert 985E-1000N
9020	Sauropoda indet.	Mygatt-Moore Quarry	Neural spine pieces				Neural spine pieces with puncture and neural spine "in pieces" with scores Spine frag - species unknown Femur 994E - 978N Vert 985E - 1000N
9021	Sauropoda indet.	Mygatt-Moore Quarry	Veterbral fragments		Dinamation International Society	1990-07-11	Vetebral fragments with scores "Below pubis" "From caped (sic) rock along side rock still in quarry" "Palmisand (sic) FNW 9-11-91-1" "FS MMQ 9/25/92/5" Could be related to 2824
9022	Sauropoda indet.	Mygatt-Moore Quarry	Bone fragments		Museums of Western Colorado		Bone fragments
9023	Sauropoda indet.	Mygatt-Moore Quarry	Vertebral fragment				Vertebral fragment "Dinosaur on clay layer" "Bone-taphonomically important"
9024	Dinosauria indet.	Mygatt-Moore Quarry	Bone fragments				Bone fragments-parallel pits & grooves- abrasion?
9025	Dinosauria indet.	Mygatt-Moore Quarry	Bone fragments				Bone fragments
9026	Dinosauria indet.	Mygatt-Moore Quarry	Bone fragments				Bone fragments
9027	Sauropoda indet.	Mygatt-Moore Quarry	Vertebral Fragments				Veterbral fragments- grooves(only in one of the boxes)
9028	Sauropoda indet.	Mygatt-Moore Quarry	Vertebral Fragments				Veterbral fragments
9029	Sauropoda indet.	Mygatt-Moore Quarry	Vertebral Fragments & limb bone fragments				Veterbral fragments & limb bone fragments
9030	Dinosauria indet.	Mygatt-Moore Quarry	Bone Fragment				Bone fragment
9031	Sauropoda indet.	Mygatt-Moore Quarry	Vertebral fragment				Vertebral fragment - insect damage "Jay Woods 8-26-11" Associated with MWC 7410
9032	Sauropoda indet.	Mygatt-Moore Quarry	Proximal rib				Proximal rib - massive insect damage
9033	Sauropoda indet.	Mygatt-Moore Quarry	Chevron				Chevron
9034	Sauropoda indet.	Mygatt-Moore Quarry	Rib fragment				Rib fragment
9035	Sauropoda indet.	Mygatt-Moore Quarry	Bone fragment				Bone fragment
9036	Sauropoda indet.	Mygatt-Moore Quarry	Vertebral fragments				Vertebral fragments
9037	Sauropoda indet.	Mygatt-Moore Quarry	Vertebral fragment				Vertebral fragment
9038	Sauropoda indet.	Mygatt-Moore Quarry	Vertebral fragment				Vertebral fragment
9039	Sauropoda indet.	Mygatt-Moore Quarry	Rib fragments				Rib fragments
9041	Sauropoda indet.	Mygatt-Moore Quarry	Cervical vertebra fragment				Cervical vertebra fragment - insect damage
9042	Sauropoda indet.	Mygatt-Moore Quarry	Partial chevron				Partial chevron
9043	Sauropoda indet.	Mygatt-Moore Quarry	Vertebral fragment				Vertebral fragment "Found right under weathered surface"
9045	Dinosauria indet.	Mygatt-Moore Quarry	Bone fragments				Bone fragments with score
9046	Dinosauria indet.	Mygatt-Moore Quarry	Bone fragments		Museums of Western Colorado		Bone fragments
9047	Sauropoda indet.	Mygatt-Moore Quarry	Bone fragments				Bone fragments, with scores
9048	Sauropoda indet.	Mygatt-Moore Quarry	Bone fragment				Bone fragment with scores Tag says "fragments but only one piece is present"
9049	Sauropoda indet.	Mygatt-Moore Quarry	Bone fragments				Bone fragments, with scores
9050	Sauropoda indet.	Mygatt-Moore Quarry	Rib fragment				Rib fragment
9051	Sauropoda indet.	Mygatt-Moore Quarry	Bone fragment				Bone fragment with score "Right on top of the clay layer"
9052	Sauropoda indet.	Mygatt-Moore Quarry	Bone fragment				Bone fragment with scores
9053	Sauropoda indet.	Mygatt-Moore Quarry	Rib fragment				Rib fragment with scores
9054	Sauropoda indet.	Mygatt-Moore Quarry	Rib fragment				Rib fragment with scores
9055	Sauropoda indet.	Mygatt-Moore Quarry	Partial centrum				Partial centrum "Bone vertebral fragments from vandalized vertebra uncovered at MWC Mudstone Quarry at Rabbit Valley by University of Utah docent. May attach to vertebra on NW side of drainage. Vertebra is covered by plastic or cardboard. 30 Sept. 1986. HJA."
9056	Sauropoda indet.	Mygatt-Moore Quarry	Rib fragments				Rib fragments Small fragments are in film canister labeled MM 592 on cap.
9057	Sauropoda indet.	Mygatt-Moore Quarry	Rib fragments				Bone fragments, with insect damage and puncture "In Pebble layer very close to clay layer."
9058	Sauropoda indet.	Mygatt-Moore Quarry	Limb bone & rib fragments				Limb bone fragments with scores & rib fragment
9059	Sauropoda indet.	Mygatt-Moore Quarry	Bone fragments				Bone fragments
9060	Sauropoda indet.	Mygatt-Moore Quarry	Sternal plate				Sternal plate with score
9061	Sauropoda indet.	Mygatt-Moore Quarry	Vertebral fragment				Vertebral fragment
9062	Sauropoda indet.	Mygatt-Moore Quarry	Vertebral fragments				Veterbral fragments
9063	Sauropoda indet.	Mygatt-Moore Quarry	Rib fragment				Rib fragment
9064	Sauropoda indet.	Mygatt-Moore Quarry	Vertebral fragment				Vertebral fragment
9065	Sauropoda indet.	Mygatt-Moore Quarry	Vertebra				Vertebra in pieces
9066	Sauropoda indet.	Mygatt-Moore Quarry	Rib				Rib in pieces
9067	Sauropoda indet.	Mygatt-Moore Quarry	Bone fragments				Bone fragment with scores
9068	Dinosauria indet.	Mygatt-Moore Quarry	Bone fragments				Bone fragment with scores
9069	Sauropoda indet.	Mygatt-Moore Quarry	Bone fragments				Bone fragments with insect damage
9070	Sauropoda indet.	Mygatt-Moore Quarry	Vertebra				Vertebra
9071	Sauropoda indet.	Mygatt-Moore Quarry	Cervical vertebral fragment				Cervial vertebral fragment - with scores
9072	Sauropoda indet.	Mygatt-Moore Quarry	Bone fragments				Bone fragments - with score flat
9073	Sauropoda indet.	Mygatt-Moore Quarry	rib fragment				rib fragment with score
9074	Sauropoda indet.	Mygatt-Moore Quarry	Bone fragment				Bone fragment - with scores
9075	Dinosauria indet.	Mygatt-Moore Quarry	rib fragment				Rib fragment with serrations
9076	Dinosauria indet.	Mygatt-Moore Quarry	bone fragments				Bone fragments with scores "Field No. 653B Notes: Two other bags (A, C)"
9077	Sauropoda indet.	Mygatt-Moore Quarry	dorsal rib fragment				Dorsal rib fragment, minor insect damage
9078	Sauropoda indet.	Mygatt-Moore Quarry	vertebral fragment				Vertebral fragment with scores
9079	Sauropoda indet.	Mygatt-Moore Quarry	rib fragment				Rib fragment with score
9080	Sauropoda indet.	Mygatt-Moore Quarry	vertebra				Vertebra in pieces many pieces, in four trays Prep tag says "Apato vert", and also other #1247B'
9081	Dinosauria indet.	Mygatt-Moore Quarry	bone fragment				Bone fragment with scores
9082	Sauropoda indet.	Mygatt-Moore Quarry	cervical vertebra				Cervical vertebra - insect damage
9083	Dinosauria indet.	Mygatt-Moore Quarry	bone fragments				Bone fragments with scores
9084	Sauropoda indet.	Mygatt-Moore Quarry	vertebra				Vertebra
9085	Sauropoda indet.	Mygatt-Moore Quarry	vertebra				Vertebra "From 2009 specimens"
9086	Sauropoda indet.	Mygatt-Moore Quarry	vertebral fragment				Vertebral fragment
9087	Sauropoda indet.	Mygatt-Moore Quarry	rib fragment				Rib fragment
9088	Sauropoda indet.	Mygatt-Moore Quarry	rib fragment				rib fragment with insect damage
9089	Sauropoda indet.	Mygatt-Moore Quarry	bone fragment				bone fragment
9090	Dinosauria indet.	Mygatt-Moore Quarry	rib fragments				rib fragments
9091	Dinosauria indet.	Mygatt-Moore Quarry	rib fragments				rib fragments
9092	Sauropoda indet.	Mygatt-Moore Quarry	bone fragments				Bone fragments
9093	Sauropoda indet.	Mygatt-Moore Quarry	vertebral fragment				Vertebral fragment
9094	Sauropoda indet.	Mygatt-Moore Quarry	bone fragments				Bone fragments
9095	Sauropoda indet.	Mygatt-Moore Quarry	rib fragments				rib fragments
9096	Theropoda indet.	Mygatt-Moore Quarry	dorsal rib				dorsal rib - insect damage long, thin, curved
9097	Dinosauria indet.	Mygatt-Moore Quarry	bone fragments				Bone fragments
9098	Sauropoda indet.	Mygatt-Moore Quarry	rib fragment				rib fragment - serrations
9099	Sauropoda indet.	Mygatt-Moore Quarry	vertebral fragments				vertebral fragments - insect damage
9100	Dinosauria indet.	Mygatt-Moore Quarry	Bone fragments				Bone fragments
9101	Sauropoda indet.	Mygatt-Moore Quarry	Dorsal rib fragment				Dorsal rib fragment "Rib 2 of 5, MMQ 99 (likely), other pkg missing"
9102	Sauropoda indet.	Mygatt-Moore Quarry	rib fragments				rib fragments
9103	Sauropoda indet.	Mygatt-Moore Quarry	rib fragment				rib fragment
9104	Sauropoda indet.	Mygatt-Moore Quarry	rib fragments				rib fragments with scores
9105	Dinosauria indet.	Mygatt-Moore Quarry	bone fragments				bone fragments (two pieces fit and need to be cemented together)
9106	Vertebrata indet.	Mygatt-Moore Quarry	bone fragments				bone fragments - tiny, in matrix
9107	Dinosauria indet.	Mygatt-Moore Quarry	bone fragments				bone fragments, in matrix
9108	Dinosauria indet.	Mygatt-Moore Quarry	bone fragments				bone fragments "MMQ 99"
9109	Dinosauria indet.	Mygatt-Moore Quarry	bone fragments				Bone fragments one piece has cut and polished end
9110	Vertebrata indet.	Mygatt-Moore Quarry	bone fragments				Bone fragments - small
9111	Sauropoda indet.	Mygatt-Moore Quarry	rib fragments				Rib fragments
9112	Sauropoda indet.	Mygatt-Moore Quarry	vertebral centrum				Vertebral centrum
9113	Sauropoda indet.	Mygatt-Moore Quarry	bone fragment				Bone fragment
9114	Sauropoda indet.	Mygatt-Moore Quarry	bone fragment				Bone fragment
9115	Sauropoda indet.	Mygatt-Moore Quarry	bone fragments				Bone fragment - score tray also contains 20+ small pieces and sediment, and vial labeled "croc tooth"
9116	Sauropoda indet.	Mygatt-Moore Quarry	bone fragments				Bone fragments "Tina's bones from the edge 7/22/04" "2 lg. pieces - goes w/box of frags."
9117	Dinosauria indet.	Mygatt-Moore Quarry	bone fragments				Bone fragments "Tina's bones from the edge 7/22/04" "Goes w/2 lg. pieces"
9118	Saurischia indet.	Mygatt-Moore Quarry	rib fragments		Museums of Western Colorado	1992-09-22	rib fragments "FS MMQ 9/22/92-2 1.05.86 2 ribs adjoining (or cervical wing?)... -see map- above metatarsal + above sauropod caudal. Found by Marty Doyle + Pete Mygatt 9-22-92"
9119	Dinosauria indet.	Mygatt-Moore Quarry	bone fragments				bone fragments
9120	Dinosauria indet.	Mygatt-Moore Quarry	bone fragments				Bone fragments "Sauropod cerv. vert."
9121	Saurischia indet.	Mygatt-Moore Quarry	rib				rib
9122	Dinosauria indet.	Mygatt-Moore Quarry	bone fragments				Bone fragments
9123	Dinosauria indet.	Mygatt-Moore Quarry	bone fragments				Bone fragments
9124	Sauropoda indet.	Mygatt-Moore Quarry	vertebra pieces				vertebra in pieces with scores (two very large trays full of pieces and two very large pieces without trays in drawer)
9125	Sauropoda indet.	Mygatt-Moore Quarry	rib fragment				Rib fragment with scores
9126	Sauropoda indet.	Mygatt-Moore Quarry	bone fragment				Bone fragment with scores
9127	Sauropoda indet.	Mygatt-Moore Quarry	bone fragments				Bone fragments
9128	Sauropoda indet.	Mygatt-Moore Quarry	vertebral fragments				Vertebral fragments with scores
9129	Dinosauria indet.	Mygatt-Moore Quarry	bone fragment				Bone fragment
9130	Dinosauria indet.	Mygatt-Moore Quarry	bone fragments				Bone fragments
9131	Dinosauria indet.	Mygatt-Moore Quarry	bone fragments				Bone fragments "Bones in one box labled wih sharpie 2, bones in other box labeled with sharpie 3"
9132	Sauropoda indet.	Mygatt-Moore Quarry	bone fragments				Bone fragments with scores "From SW area opened up in 5/2005"
9133	Sauropoda indet.	Mygatt-Moore Quarry	bone fragments				Bone fragments
9134	Sauropoda indet.	Mygatt-Moore Quarry	Vertebral fragments				Vertebral fragments "1 jacket, 3 pieces." "2 Vets: 1 dorsal/ 1 cerv." "Couldn't see cerv. in jacket."
9135	Sauropoda indet.	Mygatt-Moore Quarry	Cervical vertebra				Cervical vertebra in pieces 392, 361, 324 written on bones.
9136	Sauropoda indet.	Mygatt-Moore Quarry	Vertebral fragments				Vertebral fragments "Caudal frags."
9137	Sauropoda indet.	Mygatt-Moore Quarry	Bone fragments				Bone fragments "1/2 No2 pkg missing." "MM99"
9138	Sauropoda indet.	Mygatt-Moore Quarry	Vertebral fragments				Vertebral fragments "Apat. Vert."
9139	Dinosauria indet.	Mygatt-Moore Quarry	Bone fragments				Bone fragments "Apat. Vert."
9140	Dinosauria indet.	Mygatt-Moore Quarry	Bone fragments				Bone fragments "MMQ/ Bone frags."
9141	Dinosauria indet.	Mygatt-Moore Quarry	Bone fragments				Bone fragments "MM - Pit 2, MLD #4 Kirkland, 1990"
9142	Sauropoda indet.	Mygatt-Moore Quarry	vertebral fragments				Vertebral fragments "#1927?/MMQ 95/ Apato. cerv. vert."
9143	Sauropoda indet.	Mygatt-Moore Quarry	dorsal rib fragment		Museums of Western Colorado	1990-07-23	Dorsal rib fragment with scores "Assoc w/ rib 9.4 under sacrum, DW coll. 7-23-90"
9144	Sauropoda indet.	Mygatt-Moore Quarry	vertebral fragments				Vertebral fragments Prep. tag says "vert + rib frag"
9145	Sauropoda indet.	Mygatt-Moore Quarry	vertebral fragments				Vertebral fragments
9146	Reptilia indet.	Mygatt-Moore Quarry	rib				rib fragment in matrix
9147	Dinosauria indet.	Mygatt-Moore Quarry	gastralia/rib				gastralia/rib fragment
9148	Sauropoda indet.	Mygatt-Moore Quarry	vertebral fragment				vertebral fragment
9149	Dinosauria indet.	Mygatt-Moore Quarry	bone fragment				bone fragment, flat
9150	Sauropoda indet.	Mygatt-Moore Quarry	vertebral fragment				vertebral fragment with insect damage
9151	Sauropoda indet.	Mygatt-Moore Quarry	vertebral fragment				vertebral fragment
9152	Dinosauria indet.	Mygatt-Moore Quarry	rib fragments				rib in 3 pieces
9153	Sauropoda indet.	Mygatt-Moore Quarry	bone fragments				bone fragments Prep. tag says "1 piece of wood plus various bone fragments"
9154	Sauropoda indet.	Mygatt-Moore Quarry	vertebral fragment				vertebral fragment
9155	Sauropoda indet.	Mygatt-Moore Quarry	vertebral fragments				vertebral fragments (with scores?)
9156	Sauropoda indet.	Mygatt-Moore Quarry	rib fragment				rib fragment
9157	Sauropoda indet.	Mygatt-Moore Quarry	vertebral fragment				vertebral fragment
9158	Dinosauria indet.	Mygatt-Moore Quarry	bone fragments				Bone fragments
9159	Dinosauria indet.	Mygatt-Moore Quarry	bone fragments				Bone fragments Prep. tag says "rib frag"
9160	Dinosauria indet.	Mygatt-Moore Quarry	bone fragment				Bone fragment
9161	Dinosauria indet.	Mygatt-Moore Quarry	bone fragment				Bone fragment
9162	Dinosauria indet.	Mygatt-Moore Quarry	bone fragments				Bone fragments Prep. tag says "rib head"
9163	Sauropoda indet.	Mygatt-Moore Quarry	neural spine fragment				Neural spine fragment
9164	Sauropoda indet.	Mygatt-Moore Quarry	vertebral fragments				Vertebral fragments
9165	Sauropoda indet.	Mygatt-Moore Quarry	bone fragments				Bone fragments Prep. tag says "Sauro Rib Frags"
9166	Sauropoda indet.	Mygatt-Moore Quarry	bone fragment				Bone fragment with scores
9167	Sauropoda indet.	Mygatt-Moore Quarry	bone fragment				Bone fragment
9168	Sauropoda indet.	Mygatt-Moore Quarry	bone fragment				Bone fragment with shallow scores
9169	Sauropoda indet.	Mygatt-Moore Quarry	Rib fragment				Rib fragment
9170	Sauropoda indet.	Mygatt-Moore Quarry	distal rib fragment				distal rib fragment
9172	Sauropoda indet.	Mygatt-Moore Quarry	dorsal rib fragment				dorsal rib fragment with score
9173	Sauropoda indet.	Mygatt-Moore Quarry	rib pieces			1991-04-25	rib in 2 pieces with serrations
9174	Sauropoda indet.	Mygatt-Moore Quarry	chevron				chevron - partial
9175	Sauropoda indet.	Mygatt-Moore Quarry	bone fragments				bone fragments
9176	Dinosauria indet.	Mygatt-Moore Quarry	bone fragments		Dinamation International Society	1996-07-02	bone fragments Old DIS spec. tag says "Z bone, Sauropod, 30 cm above P Beds"
9177	Sauropoda indet.	Mygatt-Moore Quarry	rib fragment				rib fragment
9178	Sauropoda indet.	Mygatt-Moore Quarry	vertebral fragment		Dinamation International Society	2014-06-30	vertebral fragment - insect damage per DIS tag: from Morrison Fm., Brushy Basin Mem., Pebble beds
9179	Sauropoda indet.	Mygatt-Moore Quarry	bone fragment				Bone fragment
9180	Dinosauria indet.	Mygatt-Moore Quarry	Rib fragment				Rib fragment
9181	Dinosauria indet.	Mygatt-Moore Quarry	Rib fragment		Dinamation International Society	1995-07-18	Rib fragment with scores per DIS tag: "On P. bed"
9182	Sauropoda indet.	Mygatt-Moore Quarry	vertebral fragment		Museums of Western Colorado	2006-07-20	vertebral fragment per MWC prep. tag: "several packages"
9183	Sauropoda indet.	Mygatt-Moore Quarry	carpal?				? carpal
9184	Sauropoda indet.	Mygatt-Moore Quarry	posterior dorsal rib		Museums of Western Colorado	2006-07-20	posterior dorsal rib also marked in blue on rib: "1219 1220"
9185	Sauropoda indet.	Mygatt-Moore Quarry	vertebral fragment				vertebral fragment, with scores
9186	Sauropoda indet.	Mygatt-Moore Quarry	dorsal rib fragment				dorsal rib fragment, with scores
9187	Sauropoda indet.	Mygatt-Moore Quarry	bone fragments				Bone fragments with scores MWC Prep. tag: "Flat bones - tooth marks Locality: MM96"
9188	Sauropoda indet.	Mygatt-Moore Quarry	chevron				partial chevron
9190	Sauropoda indet.	Mygatt-Moore Quarry	vertebral fragments				vertebral fragments
9191	Sauropoda indet.	Mygatt-Moore Quarry	vertebral fragments				vertebral fragments MWC Prep Tag: "Allo? Vrt?; Locality: MM/00"
9192	Sauropoda indet.	Mygatt-Moore Quarry	rib or chevron fragments				rib or chevron fragments
9193	Dinosauria indet.	Mygatt-Moore Quarry	bone fragment				bone fragment
9195	Dinosauria indet.	Mygatt-Moore Quarry	rib				rib fragment
9196	Dinosauria indet.	Mygatt-Moore Quarry	rib				Rib fragment
9197	Dinosauria indet.	Mygatt-Moore Quarry	rib				Rib fragment
9198	Sauropoda indet.	Mygatt-Moore Quarry	vertebral fragments		Museums of Western Colorado	1990-07-07	Vertebral fragments with scores MWC tag: "Part of vert (?) from N wall in Pit #2, # 1.05.86 loc."
9199	Sauropoda indet.	Mygatt-Moore Quarry	rib fragment				rib fragment
9200	Sauropoda indet.	Mygatt-Moore Quarry	rib fragment				rib fragment marked "K" with down arrow
9201	Sauropoda indet.	Mygatt-Moore Quarry	bone fragments				Bone fragments
9202	Sauropoda indet.	Mygatt-Moore Quarry	bone fragments				Bone fragments
9203	Sauropoda indet.	Mygatt-Moore Quarry	vertebral fragment				vertebral fragment per MWC Prep. tag: "rib fragment"
9205	Sauropoda indet.	Mygatt-Moore Quarry	vertebral fragments				Vertebral fragments
9206	Dinosauria indet.	Mygatt-Moore Quarry	rib fragment				rib fragment
9207	Dinosauria indet.	Mygatt-Moore Quarry	rib fragment				rib fragment
9208	Dinosauria indet.	Mygatt-Moore Quarry	rib fragment				rib fragment
9209	Sauropoda indet.	Mygatt-Moore Quarry	rib fragments				rib fragments
9210	Sauropoda indet.	Mygatt-Moore Quarry	rib fragment				rib fragment "Aug. 15, 2000."
9211	Sauropoda indet.	Mygatt-Moore Quarry	proximal rib fragment				proximal rib fragment "Broken Allo. rib."
9212	Sauropoda indet.	Mygatt-Moore Quarry	proximal rib				proximal rib with striated grooves
9213	Sauropoda indet.	Mygatt-Moore Quarry	bone fragment				large bone fragment, with insect damage
9214	Sauropoda indet.	Mygatt-Moore Quarry	vertebral process				vertebral process
9215	Dinosauria indet.	Mygatt-Moore Quarry	rib fragments				rib fragments
9216	Dinosauria indet.	Mygatt-Moore Quarry	bone fragments				bone fragments "many."
9217	Sauropoda indet.	Mygatt-Moore Quarry	dorsal rib				dorsal rib in 3 pieces
9218	Dinosauria indet.	Mygatt-Moore Quarry	bone fragments				2 bone fragments-etching? "2 frags. skull?"
9219	Sauropoda indet.	Mygatt-Moore Quarry	rib fragment				rib fragment
9220	Sauropoda indet.	Mygatt-Moore Quarry	bone fragment				bone fragment, with groove
9221	Sauropoda indet.	Mygatt-Moore Quarry	vertebral fragment				vertebral fragment (with punctures?)
9222	Sauropoda indet.	Mygatt-Moore Quarry	bone fragment				large bone fragment "from 1993 or 94."
9223	Sauropoda indet.	Mygatt-Moore Quarry	limb bone fragment				limb bone fragment
9224	Sauropoda indet.	Mygatt-Moore Quarry	vertebral fragments				vertebral fragments "from MM 2002"
9225	Sauropoda indet.	Mygatt-Moore Quarry	vertebral fragments				vertebral fragments-scores on many pieces "MMQ 1141 mislabelled 1041." "some of both ends, 85% gone."
9226	Sauropoda indet.	Mygatt-Moore Quarry	vertebral fragments				vertebral fragment "neural arch frag. Possibly associated with 912/5649." "R. Peirce."
9228	Sauropoda indet.	Mygatt-Moore Quarry	bone fragment				bone fragment with insect bore hole "Dinosaur frag." "1 of 5 wrapped pieces?"
9229	Dinosauria indet.	Mygatt-Moore Quarry	bone fragment				flat bone fragment with scores "turtle shell?" MM 98
9230	Sauropoda indet.	Mygatt-Moore Quarry	rib fragment				rib fragment
9231	Dinosauria indet.	Mygatt-Moore Quarry	bone fragments				bone fragments- scores on largest piece
9232	Sauropoda indet.	Mygatt-Moore Quarry	scapular fragment				scapular fragment "1g flat bone." "(scap/pelvis)?"
9233	Sauropoda indet.	Mygatt-Moore Quarry	bone fragment				large bone fragment "1999."
9234	Sauropoda indet.	Mygatt-Moore Quarry	bone fragments				large bone fragments "in same jacket as 5685."
9235	Sauropoda indet.	Mygatt-Moore Quarry	vertebral fragments				vertebral fragments
9236	Dinosauria indet.	Mygatt-Moore Quarry	vertebral fragments				vertebral fragments with scores
9237	Dinosauria indet.	Mygatt-Moore Quarry	vertebral fragments				vertebral fragments
9238	Sauropoda indet.	Mygatt-Moore Quarry	rib fragments				rib fragments
9239	Sauropoda indet.	Mygatt-Moore Quarry	vertebral fragment				vertebral fragment
9240	Sauropoda indet.	Mygatt-Moore Quarry	rib fragments				rib fragments "VERB - FRAGMENT" (sic) "MMQ 1016, 1026, 1070, 1071, 1073, 1084, 1082, 1086"
9241	Dinosauria indet.	Mygatt-Moore Quarry	bone fragments				Bone fragments with insect damage "scutes?"
9242	Sauropoda indet.	Mygatt-Moore Quarry	vertebral fragment				vertebral fragment
9243	Sauropoda indet.	Mygatt-Moore Quarry	vertebral fragment				vertebral fragment
9244	Dinosauria indet.	Mygatt-Moore Quarry	bone fragments				Bone fragments "F.N. MM669 Lotte Jensen"
9245	Sauropoda indet.	Mygatt-Moore Quarry	vertebral fragments				vertebral fragments with puncture "Apatosaurus"
9246	Dinosauria indet.	Mygatt-Moore Quarry	bone fragment				Bone fragment with insect damage
9247	Dinosauria indet.	Mygatt-Moore Quarry	bone fragments		Museums of Western Colorado	2008-08-01	Bone fragments with score
9248	Sauropoda indet.	Mygatt-Moore Quarry	partial sternal plate				partial sternal plate
9249	Sauropoda indet.	Mygatt-Moore Quarry	bone fragment				Bone fragment
9250	Sauropoda indet.	Mygatt-Moore Quarry	rib fragment				rib fragment in 2 pieces
9251	Sauropoda indet.	Mygatt-Moore Quarry	vertebral fragments				vertebral fragments with scores
9252	Sauropoda indet.	Mygatt-Moore Quarry	bone fragments				Bone fragments with scores "No Field # Collected in 2009"
9253	Sauropoda indet.	Mygatt-Moore Quarry	rib				rib
9254	Sauropoda indet.	Mygatt-Moore Quarry	limb fragments				limb fragments "Femur scrap"
9255	Sauropoda indet.	Mygatt-Moore Quarry	scapula fragment				Scapula fragment
9256	Sauropoda indet.	Mygatt-Moore Quarry	bone fragments				Bone fragments "float" "Collected in 2007"
9257	Dinosauria indet.	Mygatt-Moore Quarry	bone fragment				Bone fragment
9258	Dinosauria indet.	Mygatt-Moore Quarry	bone fragments				Bone fragments
9259	Sauropoda indet.	Mygatt-Moore Quarry	vertebral fragments				vertebral fragments
9261	Dinosauria indet.	Mygatt-Moore Quarry	rib fragment				rib fragment
9262	Sauropoda indet.	Mygatt-Moore Quarry	vertebral fragments				vertebral fragments
9263	Dinosauria indet.	Mygatt-Moore Quarry	bone fragment				bone fragment
9264	Sauropoda indet.	Mygatt-Moore Quarry	bone fragments				Bone fragments
9265	Sauropoda indet.	Mygatt-Moore Quarry	vertebral fragment		Museums of Western Colorado	1993-09-28	vertebral fragment - furrow "On Pebble bed, Field ID: cervical rib N 1008.8 E 998.3"
9266	Sauropoda indet.	Mygatt-Moore Quarry	rib fragments		Museums of Western Colorado	2009-06-24	rib fragments
9267	Dinosauria indet.	Mygatt-Moore Quarry	rib				rib fragment, in 2 pieces
9268	Sauropoda indet.	Mygatt-Moore Quarry	bone fragment		Museums of Western Colorado	2009-08-05	Bone fragment
9269	Dinosauria indet.	Mygatt-Moore Quarry	bone fragments		Museums of Western Colorado	1994-06-07	Bone fragments, with scores "Chevron, N 1007 E 994.1"
9270	Dinosauria indet.	Mygatt-Moore Quarry	rib fragments		Dinamation International Society	1995-07-17	rib fragments, with score "On Pebble bed, N 1008.5 E 995"
9271	Sauropoda indet.	Mygatt-Moore Quarry	vertebral fragments				vertebral fragments
9272	Dinosauria indet.	Mygatt-Moore Quarry	vertebral fragment				vertebral fragment
9273	Sauropoda indet.	Mygatt-Moore Quarry	bone fragment				Bone fragment, with depression
9274	Saurischia indet.	Mygatt-Moore Quarry	vertebral fragment				vertebral fragment specimen marked 330 MM 99
9275	Sauropoda indet.	Mygatt-Moore Quarry	bone fragment				Bone fragment, with furrow
9276	Dinosauria indet.	Mygatt-Moore Quarry	rib fragment		Dinamation International Society	1993-08-03	Rib fragment, with score "chevron" N 1005.7 E 996.4
9277	Theropoda indet.	Mygatt-Moore Quarry	gastralia				gastralia
9278	Sauropoda indet.	Mygatt-Moore Quarry	vertebral fragments				vertebral fragments "Dinosauria"
9279	Sauropoda indet.	Mygatt-Moore Quarry	vertebral fragments				vertebral fragments "caudal vert"
9280	Sauropoda indet.	Mygatt-Moore Quarry	rib + vertebral fragments		Museums of Western Colorado	1992-09-25	rib + vertebral fragments - scores "92-11: Bone fragments from near tibia HJA 9/25/92-11" "FS MMQ 9-25-92-8: Rib? frag from W wall, taken to make trenching room. Rest of bone is heading W. into wall of Rt. 1. HJA 9/25/92" Three bone fragments in this tray are already marked with gesso and black pen: 1026-1, 1026-2, 1026-3. These three pieces put in separate tray, labeled FIC.
9281	Sauropoda indet.	Mygatt-Moore Quarry	bone fragment		Museums of Western Colorado	2009-07-15	bone fragment, with scores "fragment (7-15-09)", collected on that date?
9282	Sauropoda indet.	Mygatt-Moore Quarry	bone fragment		Museums of Western Colorado	2009-06-22	bone fragment "Ray's rib near cervical"
9283	Dinosauria indet.	Mygatt-Moore Quarry	proximal rib		Dinamation International Society	1993-07-27	proximal rib, in 2 pieces
9284	Dinosauria indet.	Mygatt-Moore Quarry	rib fragments				rib fragments
9285	Sauropoda indet.	Mygatt-Moore Quarry	bone fragment				bone fragment, with scores
9286	Dinosauria indet.	Mygatt-Moore Quarry	rib fragments				rib fragments
9287	Sauropoda indet.	Mygatt-Moore Quarry	vertebral process				vertebral process, with pitting
9288	Sauropoda indet.	Mygatt-Moore Quarry	vertebral fragment		Dinamation International Society		flat vertebral fragment, with score "On Pebble bed. N 100.7. E 991.45"
9289	Dinosauria indet.	Mygatt-Moore Quarry	bone fragments				bone fragments
9290	Sauropoda indet.	Mygatt-Moore Quarry	bone fragment				bone fragment, with ?puncture
9291	Sauropoda indet.	Mygatt-Moore Quarry	rib fragment		Dinamation International Society	1993-06-16	rib fragment
9292	Sauropoda indet.	Mygatt-Moore Quarry	rib fragment				dorsal rib fragment, with scores and furrows
9293	Dinosauria indet.	Mygatt-Moore Quarry	rib fragment				rib fragment
9294	Dinosauria indet.	Mygatt-Moore Quarry	bone fragment		Dinamation International Society	1993-09-21	bone fragment "interesting bone on Pebble bed" N 1007.6, E 996.1
9295	Sauropoda indet.	Mygatt-Moore Quarry	rib fragments				rib fragments "single fragment"
9296	Sauropoda indet.	Mygatt-Moore Quarry	vertebral fragments				vertebral fragments, with scores "1.05.86"
9297	Sauropoda indet.	Mygatt-Moore Quarry	transverse process				transverse process, with striated grooves
9298	Sauropoda indet.	Mygatt-Moore Quarry	rib fragment				rib fragment
9299	Dinosauria indet.	Mygatt-Moore Quarry	rib fragments				rib fragments
9300	Sauropoda indet.	Mygatt-Moore Quarry	vertebral fragment				vertebral fragment
9301	Dinosauria indet.	Mygatt-Moore Quarry	bone fragment				bone fragment, with striated groove
9302	Dinosauria indet.	Mygatt-Moore Quarry	rib fragment				rib fragment
9303	Sauropoda indet.	Mygatt-Moore Quarry	rib fragment				dorsal rib fragment
9304	Sauropoda indet.	Mygatt-Moore Quarry	vertebra fragments		Dinamation International Society		cervical vertebra fragments
9305	Sauropoda indet.	Mygatt-Moore Quarry	tarsal			1996-08-08	tarsal?
9306	Sauropoda indet.	Mygatt-Moore Quarry	vertebral process			1992-06-30	vertebral process fragments "6-30-92-2" 2 pieces marked with gesso and pigment pen "MWC 9036" but corrected to 9306 02/20 HES
9307	Sauropoda indet.	Mygatt-Moore Quarry	rib fragments				two rib fragments
9308	Sauropoda indet.	Mygatt-Moore Quarry	vertebral fragments			1999-02-22	vertebral fragments (problem: four pieces look like teeth) "vandalized pit in west corner." "Found 2/22/99"
9309	Sauropoda indet.	Mygatt-Moore Quarry	pectoral girdle			1999-02-23	pectoral girdle fragment, with insect damage
9310	Sauropoda indet.	Mygatt-Moore Quarry	vertebral fragments				vertebral fragments, with scores
9311	Sauropoda indet.	Mygatt-Moore Quarry	vertebral fragments				vertebral fragments, with scores
9312	Dinosauria indet.	Mygatt-Moore Quarry	gastralia		Dinamation International Society	1997-09-18	gastralia fragments "B 1000.0, H 1012.5"
9313	Sauropoda indet.	Mygatt-Moore Quarry	rib fragments				two rib fragments "May fit to MM 713"
9314	Sauropoda indet.	Mygatt-Moore Quarry	limb fragment		Museums of Western Colorado	2005-06-12	limb fragment, with many scores
9315	Allosaurus sp.	Mygatt-Moore Quarry	prezygapophysis				prezygapophysis
9316	Dinosauria indet.	Mygatt-Moore Quarry	rib fragment				rib fragment "Allosaurus rib head"
9317	Sauropoda indet.	Mygatt-Moore Quarry	dorsal rib				dorsal rib
9318	Theropoda indet.	Mygatt-Moore Quarry	cervical rib & bone fragments				cervical rib & bone fragments "May be part of 4088"
9319	Saurischia indet.	Mygatt-Moore Quarry	rib fragments				rib fragments
9320	Theropoda indet.	Mygatt-Moore Quarry	rib		Dinamation International Society	1997-06-23	rib "40cm B 999.6, H 1011.9"
9321	Sauropoda indet.	Mygatt-Moore Quarry	proximal chevron				proximal chevron, in 2 pieces
9322	Dinosauria indet.	Mygatt-Moore Quarry	rib				rib Field #'s: 915,955,963,982,1080
9323	Dinosauria indet.	Mygatt-Moore Quarry	rib				rib
9324	Apatosaurus sp.	Mygatt-Moore Quarry	neural spine fragments				neural spine fragments
9325	Apatosaurus sp.	Mygatt-Moore Quarry	cervical vertebra fragment				cervical vertebra fragment "in jacket with unknown piece"
9326	Sauropoda indet.	Mygatt-Moore Quarry	vertebral fragment				vertebral fragment
9327	Apatosaurus sp.	Mygatt-Moore Quarry	proximal cervical verebra				proximal cervical vertebra, in pieces
9328	Sauropoda indet.	Mygatt-Moore Quarry	vertebral fragment				vertebral fragment "single piece"
9329	Sauropoda indet.	Mygatt-Moore Quarry	vertebral process				vertebral process, with score
9330	Sauropoda indet.	Mygatt-Moore Quarry	dorsal rib fragment				dorsal rib fragment
9331	Sauropoda indet.	Mygatt-Moore Quarry	vertebral fragment				vertebral fragment
9332	Sauropoda indet.	Mygatt-Moore Quarry	scapular fragment				scapular fragment, with score and insect damage "found with MWC 6712"
9333	Sauropoda indet.	Mygatt-Moore Quarry	caudal vertebra		Dinamation International Society	1993-07-06	caudal vertebra, in pieces "from Pebble bed"
9339	Sauropoda indet.	Mygatt-Moore Quarry	rib	2018	Museums of Western Colorado	2018-06-08	proximal rib fragment with many shallow scores
9340	Mymoorapelta maysi	Mygatt-Moore Quarry	dorsal vertebra	2018	Museums of Western Colorado	2018-06-08	partial dorsal vertebra, neural arch is mostly missing
9349	Sauropoda indet.	Mygatt-Moore Quarry	caudal vertebra	2015	Museums of Western Colorado		distal caudal vertebra found in jacket with coracoid found 2015 or earlier, collected 2016 or later
9350	Theropoda indet.	Mygatt-Moore Quarry	ungual	2018	Museums of Western Colorado	2019-06-29	pes claw Found as float near 1876 jacket trench. Possibly came from concretion layer.
9351	Sauropoda indet.	Mygatt-Moore Quarry	Vertebral process	2018	Museums of Western Colorado	2018-06-20	Transverse process (partial) of ?dorsal vertebra Found just north of MMQ 2075
9352	Sauropoda indet.	Mygatt-Moore Quarry	neural spine				Neural spine (partial) of ?dorsal vertebra no field number on prep tag, just "MMQ"
9353	Dinosauria indet.	Mygatt-Moore Quarry	bone fragment		Museums of Western Colorado		Vertebral fragment with shallow scores and odd depressions. found in "Big Pit" as an expeditioner project
9354	Theropoda indet.	Mygatt-Moore Quarry	limb shaft fragment	2018	Museums of Western Colorado	2018-06-04	limb fragment - shaft only, no epiphyses several scores present on shaft 1st bone collected and mapped in 2018 (originally marked 2XXX) - collected via plaster bandages
9355	Theropoda indet.	Mygatt-Moore Quarry	caudal vertebra	2018	Museums of Western Colorado	2018-07-16	partial centrum of caudal vertebra Found in the large concretion collected near the "Millenium Coracoid" jacket (MMQ 1875) after it was removed. The concretion was not given a field number. Possibly associated material with the other Allosaurus postcrania found atop the concretion layer in this part of the quarry.
9356	Allosaurus sp.	Mygatt-Moore Quarry	left phalanx I of manus digit III	2018	Museums of Western Colorado	2018-07-16	complete left phalanx I of manus digit III Found in the large concretion collected near the "Millenium Coracoid" jacket (MMQ 1875) after it was removed. The concretion was not given a field number. Possibly associated material with the other Allosaurus postcrania found atop the concretion layer in this part of the quarry.
9357	Allosaurus sp.	Mygatt-Moore Quarry	left metatarsal IV	2018	Museums of Western Colorado	2018-07-16	partial left metatarsal IV Found in the large concretion collected near the "Millenium Coracoid" jacket (MMQ 1875) after it was removed. The concretion was not given a field number. Possibly associated material with the other Allosaurus postcrania found atop the concretion layer in this part of the quarry.
9358	Actinopterygii indet.	Mygatt-Moore Quarry	partial skeleton	2019	Museums of Western Colorado	2019-06-05	Partial articulated skeleton of an actinopterygiian. Vertebrae, fins and ribs are clearly visible, but no head or tail, making identification impossible. Collected with a second specimen (MWC 9359). Found in a distinct gray layer, under the white/purple banded "main fish layer"
9359	Actinopterygii indet.	Mygatt-Moore Quarry	partial skeleton	2019	Museums of Western Colorado	2019-06-05	Partial articulated skeleton of an actinopterygiian. Vertebrae, fins and ribs are clearly visible, but no head or tail, making identification impossible. Collected with a second specimen (MWC 9358). Found in a distinct gray layer, under the white/purple banded "main fish layer"
9360	Dinosauria indet.	Mygatt-Moore Quarry	Chevron	2018	Museums of Western Colorado	2018-06-11	Partial head of a chevron, size is consitent with either Mymoorapelta or theropod. Not enough to identify taxon.
9361	Allosaurus sp.	Mygatt-Moore Quarry	tibia	2017.01	Museums of Western Colorado	2017-07-17	partial tibia, including all but distal 1/4. Surface is fairly flaky and bone surface marks could not be determined. Found low in quarry and next to the proximal end of a theropod femur.
9362	Dinosauria indet.	Mygatt-Moore Quarry	bone fragment	2019	Museums of Western Colorado		bone fragment with branching grooves - root etching - that is not from modern plant activity Collected in 2019 Central Wall Nugget Bucket
9363	Dinosauria indet.	Mygatt-Moore Quarry	vertebral fragment	2019	Museums of Western Colorado		vertebral fragment with deep score on convex margin Collected in 2019 Central Wall Nugget Bucket
9364	Sauropoda indet.	Mygatt-Moore Quarry	rib	2019	Museums of Western Colorado		rib fragment with shallow score Collected in 2019 Central Wall Nugget Bucket
9365	Dinosauria indet.	Mygatt-Moore Quarry	bone fragment	2019	Museums of Western Colorado		bone fragment with shallow score Collected in 2019 Central Wall Nugget Bucket
9366	Dinosauria indet.	Mygatt-Moore Quarry	bone fragment	2019	Museums of Western Colorado		bone fragment in four pieces with shallow score on largest piece Collected in 2019 Central Wall Nugget Bucket
9367	Dinosauria indet.	Mygatt-Moore Quarry	bone fragment	2019	Museums of Western Colorado		flat bone fragment in two pieces with shallow score on larger piece Collected in 2019 Central Wall Nugget Bucket
9368	Allosaurus sp.	Mygatt-Moore Quarry	phalanx	2018	Museums of Western Colorado	2018-07-11	Left pedal phalanx I of digit II Preserved in excellent condition, complete element
9372	Saurischia indet.	Mygatt-Moore Quarry	thin flat bone fragments, poss. cranial element or vertebral lamina	2017.01	Museums of Western Colorado	2017-07-14	Thin flat bone fragment. Possibly cranial element (sauropod or thereopod) or sauropod vertebral lamina. Largest fragment has shallow scores.
9373	Theropoda indet.	Mygatt-Moore Quarry	Phalanx, distal portion, with condyles	2015	Museums of Western Colorado	2015-08-10	Partial phalanx, distal portion, poorly preserved. Condyles are clearly visible. Small. Collected with vertebral fragments from a Sauropod - not catalogued (DNC)
9407	Allosaurus sp.	Mygatt-Moore Quarry	caudal vertebra		Dinamation International Society	1993-08-14	Proximal caudal vertebral centrum, no neural arch preserved. Collected from low in the quarry, on top of the pebble layer. Centrum has several striated marks - bite marks from other theropods. Old tag gave a field number of "MM 170?" which is incorrect. MM 170 is Mymoorapelta material. Original correct field number is unknown.
9408	Allosaurus sp.	Mygatt-Moore Quarry	pubic boot (pubis)	D-1997.2.1	Dinamation International Society	1997-09-21	Partial pubis - pubic boot
9409	Allosaurus sp.	Mygatt-Moore Quarry	fibula		Museums of Western Colorado	2007-06-05	right fibula Found in three pieces, distal end broken in situ when found
9410	Allosaurus fragilis	Mygatt-Moore Quarry	cervical vertebra	D-2005.6	Museums of Western Colorado	2005-06-22	Cervical vertebra
9411	Allosaurus sp.	Mygatt-Moore Quarry	rib	D-1997.2.1	Dinamation International Society		Partial dorsal rib - distal end is missing
9412	Allosaurus sp.	Mygatt-Moore Quarry	scapula	D-1996.2.1	Dinamation International Society		juvenile scapula, dorsal tip is missing.
9413	Allosaurus sp.	Mygatt-Moore Quarry	tibia				Tibia fragment (proxmial) with depressed fracture
9414	Theropoda indet.	Mygatt-Moore Quarry	vertebra				partial centrum with prep damage.
9446	Dinosauria indet.	Mygatt-Moore Quarry	rib				narrow rib in fragments. Largest fragment has a short, slightly curved score.
9453	Sauropoda indet.	Mygatt-Moore Quarry	rib		Museums of Western Colorado		Sauropod rib fragment in eight pieces. Second largest pices has a few scores. One striated score is present next to an area of flaked surface bone, indicating that a tooth pierced through dried-out bone and scored the layer beneath. Found in lab with no field number.
9490	Apatosaurus sp.	Mygatt-Moore Quarry	coracoid	2015	Museums of Western Colorado	2018-07-16	near complete coracoid, with numerous scores covering the superficial surface. Found by Brian Studebaker in 2015 on the central wall Field jacket nicknamed the "Millenium Coracoid", because the shape was simiar to the Millenium Falcon - contained numerous other bones
9519	Theropoda indet.	Mygatt-Moore Quarry	vertebra	2019	Museums of Western Colorado	2019-08-05	Vertebral centrum and fragment, very exfoliated, almost no surface bone left. Deep and well visible pleurocoels on dorsal surface. Probably a cervical vertebra.
9520	Sauropoda indet.	Mygatt-Moore Quarry	vertebra	2018	Museums of Western Colorado	2018-06-27	Vertebral spine fragment with two intersecting scores. No field number, was collected as an expeditioner project.
9521	Sauropoda indet.	Mygatt-Moore Quarry	rib	2015	Museums of Western Colorado		dorsal rib fragment with several shallow scores found in jacket with coracoid found 2015, collected 2016 or later
9522	Sauropoda indet.	Mygatt-Moore Quarry	vertebra	2018	Museums of Western Colorado		vertebral fragment with scores
9523	Dinosauria indet.	Mygatt-Moore Quarry	rib	2018	Museums of Western Colorado	2018-06-22	Rib fragment with four, in-line deep scores
9524	Sauropoda indet.	Mygatt-Moore Quarry	vertebra				Vertebral lamina fragment with two pairs of depressions on opposite sides of the lamina. One of which is a full depressed fracture. No field number, was collected as an expeditioner project.
9525	Apatosaurus sp.	Mygatt-Moore Quarry	caudal vertebra	D-1998.1.1	Museums of Western Colorado	1998-07-23	near complete caudal vertebra insect damage present as well as a curved score on the left lateral side
9526	Sauropoda indet.	Mygatt-Moore Quarry	vertebra	D-1995.1.1	Museums of Western Colorado		partial large vertebra with numerous bone surface modifications - scores, striations, and insect pitting
9527	Apatosaurus sp.	Mygatt-Moore Quarry	dorsal vertebrae	D-2006.0117	Museums of Western Colorado	2006-08-11	pair of fused dorsal vertebra with several bone surface modifications, including scores, insect pitting and root marks Field notes: trending 219 degrees and plunging 17 degrees
9528	Apatosaurus sp.	Mygatt-Moore Quarry	dorsal vertebrae	D-2006.0117	Museums of Western Colorado	2006-07-27	Jacketed together wiht MWC 9529 (MM 1232), subadult dorsal vertebrae in articulation Contains bone surface modifications - scores and insect pitting
9529	Apatosaurus sp.	Mygatt-Moore Quarry	dorsal vertebrae	D-2006.0117	Museums of Western Colorado	2006-07-27	Jacketed together wiht MWC 9528 (MM 1231), subadult dorsal vertebrae in articulation Contains bone surface modifications - scores and root marks
9530	Apatosaurus sp.	Mygatt-Moore Quarry	cervical vertebra	D-2002.6	Museums of Western Colorado		large cervical vertebra Contains bone surface modifications - scores and root marks Field ID of 697, but is incorrect - that is an allosaur tooth
9531	Sauropoda indet.	Mygatt-Moore Quarry	caudal vertebra		Museums of Western Colorado		distal caudal vertebra. Was located directly beneath Allosaur fibula (MM 1295) Contains bone surface modifications - insect pitting and root marks
9539	Allosaurus fragilis	Mygatt-Moore Quarry	humerus	2018	Museums of Western Colorado	2018-07-20	Complete humerus
9541	Sauropoda indet.	Mygatt-Moore Quarry	chevron	2017.01	Museums of Western Colorado	2017-08-11	proximal fragment of an anterior chevron
9542	Allosaurus sp.	Mygatt-Moore Quarry	ulna	2018	Museums of Western Colorado	2017-08-11	complete right ulna Found in Jacket MMQ 2075 - which contained right and left Allosaur pubes and a tooth (MWC 8962, 8963, and 9345)
9543	Sauropoda indet.	Mygatt-Moore Quarry	bone fragment	D-2005.6	Museums of Western Colorado	2005-08-18	large bone fragment (?vertebra) with six shallow, criss crossing scores and one deep score
9557	Sauropoda indet.	Mygatt-Moore Quarry	dorsal rib				dorsal rib in three pieces with scores, striations, and insect damage present
9558	Sauropoda indet.	Mygatt-Moore Quarry	cervical vertebra	D-2005.6	Museums of Western Colorado	2005-07-21	Cervical vertebra fragment with insect pitting inside pleurocoels
9559	Sauropoda indet.	Mygatt-Moore Quarry	pubis	D-1998.1.1	Museums of Western Colorado	1998-08-13	pubis peduncle with massive ammounts of insect damage
9560	Sauropoda indet.	Mygatt-Moore Quarry	pubis	D-1999.6	Museums of Western Colorado	1999-06-17	pubis fragment with a very flaky surface, ?scores present
9561	Sauropoda indet.	Mygatt-Moore Quarry	rib	D-2006.0117	Museums of Western Colorado	2006-09-07	large dorsal rib with splintered fracture Duplicate field number with MWC 5921 and MWC 6649 High/medium quarry level
9562	Sauropoda indet.	Mygatt-Moore Quarry	Chevron	D-2008.0065	Museums of Western Colorado	2008-07-31	nice sauropod chevron medium quarry level
9563	Sauropoda indet.	Mygatt-Moore Quarry	rib	D-2003.11	Museums of Western Colorado	2003-06-10	large dorsal rib, near complete, with scores, insect pitting and possible serrations "Walt's Rib" low quarry level
9565	Sauropoda indet.	Mygatt-Moore Quarry	cervical vertebra	D-1999.6	Museums of Western Colorado	1999-06-22	cervical vertebra in pieces, eroded. second largest pieces has a small depression and a deep score. Found in Pebble layer.
9566	Sauropoda indet.	Mygatt-Moore Quarry	vertebral fragments	2018	Museums of Western Colorado	2019-08-10	partial vertebral laminae and neural spine On long fragment with spongiosa showing, two parallel grooves are present. Larger pieces have possible scores, but hard to tell.
9568	Dinosauria indet.	Mygatt-Moore Quarry	bone fragments	2010	Museums of Western Colorado	2010-07-12	Bone fragments - largest fragment has a long shallow score and a weak draw of serrations
9571	Dinosauria indet.	Mygatt-Moore Quarry	bone fragment				Bone fragment with oblong depressed fracture No field number. Found in lab.
9572	Apatosaurus louisae	Mygatt-Moore Quarry	cervical vertebra #4	2014.01	Museums of Western Colorado	2014-06-06	Anterior cervical vertebra (#4) in fragments. No cervical rib preserved with specimen. Same field number and jacket as MWC 8587. Found low in the quarry.
9573	Sauropoda indet.	Mygatt-Moore Quarry	rib	2018	Museums of Western Colorado	2018-06-22	Large dorsal rib fragment with numerous, long striated scores criss crossing over the surface. Scores are shallow on the bone surface. Found low in the quarry.
9574	Allosaurus sp.	Mygatt-Moore Quarry	phalanx	2018	Museums of Western Colorado	2018-06-04	Phalanx I from digit I on the left manus, plus an associated bone fragment. Found low in the quarry.
9575	Sauropoda indet.	Mygatt-Moore Quarry	vertebral bone fragments including ?pleurocoel	2015	Museums of Western Colorado	2015-07-27	vertebral bone fragments. Y-shaped fragment (? part of pleurocoel) contains branching root etch marks.
9603	Allosaurus sp.	Mygatt-Moore Quarry	caudal vertebra	2018	Museums of Western Colorado	2018-06-08	Distal caudal vertebra with neural arch. Pre- and Post-zygopotheses are not complete. Found low in main quarry horizon.
9604	Allosaurus sp.	Mygatt-Moore Quarry	caudal vertebra	2018	Museums of Western Colorado	2018-06-04	Distal caudal vertebra with neural arch. Pre- and Post-zygapotheses are not complete. Found low in main quarry horizon.
9606	Sauropoda indet.	Mygatt-Moore Quarry	vertebra	2017.01	Museums of Western Colorado	2017-08-16	Vertebral centrum in fragments, with many pneumatic cavities exposed. The smaller of the two largest fragments has a large, ovoid puncture with bone crushed into the puncture.
9609	Sauropoda	Mygatt-Moore Quarry	rib		Dinamation International Society	1990-07-17	dorsal rib in two pieces Insect pits/furrows along main spine and rib head
9610	Sauropoda	Mygatt-Moore Quarry	bone fragment				bone fragment (vertebra lamina?) Insect pits/furrows near narrow end
9611	Sauropoda	Mygatt-Moore Quarry	bone fragment		Museums of Western Colorado	2002-07-24	? Pelvic Fragment lots of surface wear with possible insect pitting "Zach's Funky Bone"
9612	Sauropoda	Mygatt-Moore Quarry	rib				proximal rib fragment abundant insect pits/furrows and possible scores
9613	Sauropoda	Mygatt-Moore Quarry	rib		Museums of Western Colorado	1998-08-18	proximal rib fragment Found on top of MM 294 abundant insect pits/furrows on anterior surface
9614	Sauropoda	Mygatt-Moore Quarry	bone fragment				flat bone, possibly a partial sternal plate striations present on superficial surface
9615	Sauropoda	Mygatt-Moore Quarry	rib				dorsal rib fragment many scores and striations, some criss-crossing each other. Scores are present on both surfaces. One very long striation runs almost the length of the bone
9616	Sauropoda	Mygatt-Moore Quarry	rib	D-1997.2.1	Dinamation International Society		dorsal rib fragment - distal section ovoid cluster of insect pits/furrows on concave surface
9617	Sauropoda	Mygatt-Moore Quarry	rib				dorsal rib in two pieces insect pits/furrows present on distal fragmnet, two pleurocoels present on proximal fragment
9618	Sauropoda	Mygatt-Moore Quarry		D-1999.6	Museums of Western Colorado	1999-06-16	Vertebral or pelvic fragment numerous scores present located low in the quarry
9619	Sauropoda	Mygatt-Moore Quarry	rib				dorsal rib linear insect pits leading into a large pit cluster
9620	Sauropoda	Mygatt-Moore Quarry					cervical rib and bone fragments all from same field jacket score present on cervical rib
9621	Apatosaurus sp.	Mygatt-Moore Quarry	Dorsal Vertebra		Museums of Western Colorado	2007-08-31	Collected in a field jacket (MM 1370) with a cervical vertebra. Located medium to low in the quarry. Preserves scores, insect pitting and root marks.
9622	Camarasaurus sp.	Mygatt-Moore Quarry	Dorsal Vertebra				Collected in October 1991 by MWC Dorsal vertebra #9. "Master Map Index 131, Pit #2" Preserves insect pits/furrows.
9623	Sauropoda indet.	Mygatt-Moore Quarry					bone fragments Preserves insect pits/furrows and root marks.
9624	Sauropoda indet.	Mygatt-Moore Quarry					bone fragments Preserves insect pits/furrows and root marks.
9625	Sauropoda indet.	Mygatt-Moore Quarry			Museums of Western Colorado	2007-05-16	vertebral fragments Preserves insect pits/furrows and root marks.
9626	Sauropoda indet.	Mygatt-Moore Quarry	coracoid				partial coracoid Preserves insect pits/furrows
9627	Sauropoda indet.	Mygatt-Moore Quarry		D-1999.6	Museums of Western Colorado	1999-07-08	bone fragments (?transverse process). Preserves insect pits/furrows.
9628	Camarasaurus sp.	Mygatt-Moore Quarry	cervical vertebra	D-2003.11	Museums of Western Colorado	2003-08-26	cervical vertebra found in pebble layer Preserves insect pits/furrows and root traces.
9629	Sauropoda indet.	Mygatt-Moore Quarry	vertebra		Dinamation International Society	1992-09-25	vertebra Preserves insect pits/furrows and scores.
9630	Sauropoda indet.	Mygatt-Moore Quarry					bone fragment Preserves insect pits/furrows
9631	Sauropoda indet.	Mygatt-Moore Quarry	caudal vertebra	D-1995.2.1	Dinamation International Society		caudal vertebra (distal) Preserves insect pits/furrows, a score, and root marks
9632	Diplodocidae	Mygatt-Moore Quarry	caudal vertebra		Museums of Western Colorado	1989-06-01	caudal vertebra (proximal) "Fran Clodt's Bone" Preserves insect pits/furrows, a score, and root marks
9633	Camarasaurus sp.	Mygatt-Moore Quarry	dorsal vertebra neural spine				neural spine from a dorsal vertebra Preserves punctures and associated fracturing.
9634	Diplodocidae indet.	Mygatt-Moore Quarry	distal caudal vertebra		Museums of Western Colorado	2007-08-07	Distal caudal vertebra, found in the south end of the quarry. Preserves scores.
9635	Diplodocidae indet.	Mygatt-Moore Quarry	caudal vertebra				distal caudal vertebra. Preserves scores.
[truncated: 61 more rows]
